# Supplementary material for: Genome-wide identification and characterization of InDels and SNPs in Glycine max and Glycine soja for contrasting seed permeability traits
Source: BMC Plant Biol. 2018 Jul 9;18:141. doi: 10.1186/s12870-018-1341-2 (PMC6038289; doi:10.1186/s12870-018-1341-2)
Supplement: Supplementary file 4 — Identification of total InDels in G. soja with respect to reference genome. (CSV 97568 kb) [file 12870_2018_1341_MOESM4_ESM.csv]

Gene	Location	Allele	Consequence	Impact	Transcript	Biotype	HGVSc	HGVSp	cDNA_position	CDS_position	Protein_position	Amino_acids	Codons	Strand	SWISSPROT	TREMBL	UNIPARC	DOMAINS
GLYMA0010S50	10:14569-14569	T	upstream_gene_variant	MODIFIER	GLYMA0010S50.1	protein_coding	-	-	-	-	-	-	-	-1	-	K7K0Q3_SOYBN	UPI000295A727	-
GLYMA10G00210	10:14569-14569	T	downstream_gene_variant	MODIFIER	GLYMA10G00210.1	protein_coding	-	-	-	-	-	-	-	-1	-	I1L7B1_SOYBN	UPI000233C209	-
GLYMA10G00210	10:29884-29884	A	upstream_gene_variant	MODIFIER	GLYMA10G00210.1	protein_coding	-	-	-	-	-	-	-	-1	-	I1L7B1_SOYBN	UPI000233C209	-
GLYMA10G00220	10:39666-39668	-	intron_variant	MODIFIER	GLYMA10G00220.1	protein_coding	GLYMA10G00220.1:c.442-572_442-571delAA	-	-	-	-	-	-	-1	-	I1L7B2_SOYBN	UPI000233D239	-
GLYMA10G00230	10:39666-39668	-	frameshift_variant	HIGH	GLYMA10G00230.1	protein_coding	GLYMA10G00230.1:c.88_89delTT	GLYMA10G00230.1:p.Phe30LeufsTer11	184-185	70-71	24	F/X	TTt/t	1	-	K7LGN5_SOYBN	UPI000295C5FF	Low_complexity_(Seg):seg,Transmembrane_helices:TMhelix
GLYMA10G00220	10:44826-44826	T	upstream_gene_variant	MODIFIER	GLYMA10G00220.1	protein_coding	-	-	-	-	-	-	-	-1	-	I1L7B2_SOYBN	UPI000233D239	-
GLYMA10G00230	10:44826-44826	T	downstream_gene_variant	MODIFIER	GLYMA10G00230.1	protein_coding	-	-	-	-	-	-	-	1	-	K7LGN5_SOYBN	UPI000295C5FF	-
-	10:52819-52820	-	intergenic_variant	MODIFIER	-	-	-	-	-	-	-	-	-	-	-	-	-	-
-	10:54729-54730	-	intergenic_variant	MODIFIER	-	-	-	-	-	-	-	-	-	-	-	-	-	-
-	10:55506-55517	-	intergenic_variant	MODIFIER	-	-	-	-	-	-	-	-	-	-	-	-	-	-
GLYMA10G00250	10:71392-71392	T	upstream_gene_variant	MODIFIER	GLYMA10G00250.1	protein_coding	-	-	-	-	-	-	-	-1	-	E2FKH6_SOYBN	UPI0001E40FA2	-
GLYMA10G00260	10:71392-71392	T	downstream_gene_variant	MODIFIER	GLYMA10G00260.1	protein_coding	-	-	-	-	-	-	-	-1	-	E2FKH7_SOYBN	UPI0001E40FA3	-
GLYMA10G00280	10:93168-93168	TT	upstream_gene_variant	MODIFIER	GLYMA10G00280.1	protein_coding	-	-	-	-	-	-	-	-1	-	I1L7B5_SOYBN	UPI000233D665	-
GLYMA10G00291	10:93168-93168	TT	upstream_gene_variant	MODIFIER	GLYMA10G00291.1	protein_coding	-	-	-	-	-	-	-	1	-	K7LGN6_SOYBN	UPI00029565B0	-
GLYMA10G00300	10:93168-93168	TT	downstream_gene_variant	MODIFIER	GLYMA10G00300.1	protein_coding	-	-	-	-	-	-	-	-1	-	I1L7B7_SOYBN	UPI000233C1D4	-
GLYMA10G00280	10:93255-93255	TTTCAAA	upstream_gene_variant	MODIFIER	GLYMA10G00280.1	protein_coding	-	-	-	-	-	-	-	-1	-	I1L7B5_SOYBN	UPI000233D665	-
GLYMA10G00291	10:93255-93255	TTTCAAA	upstream_gene_variant	MODIFIER	GLYMA10G00291.1	protein_coding	-	-	-	-	-	-	-	1	-	K7LGN6_SOYBN	UPI00029565B0	-
GLYMA10G00300	10:93255-93255	TTTCAAA	downstream_gene_variant	MODIFIER	GLYMA10G00300.1	protein_coding	-	-	-	-	-	-	-	-1	-	I1L7B7_SOYBN	UPI000233C1D4	-
GLYMA10G00300	10:104754-104754	TCTTGAGTTAA	upstream_gene_variant	MODIFIER	GLYMA10G00300.1	protein_coding	-	-	-	-	-	-	-	-1	-	I1L7B7_SOYBN	UPI000233C1D4	-
GLYMA10G00310	10:104754-104754	TCTTGAGTTAA	downstream_gene_variant	MODIFIER	GLYMA10G00310.1	protein_coding	-	-	-	-	-	-	-	-1	-	I1L7B8_SOYBN	UPI00023C9D2E	-
GLYMA10G00310	10:104754-104754	TCTTGAGTTAA	downstream_gene_variant	MODIFIER	GLYMA10G00310.2	protein_coding	-	-	-	-	-	-	-	-1	-	I1L7B9_SOYBN	UPI00023C9D2F	-
GLYMA10G00320	10:104754-104754	TCTTGAGTTAA	upstream_gene_variant	MODIFIER	GLYMA10G00320.1	protein_coding	-	-	-	-	-	-	-	1	-	I1L7C0_SOYBN	UPI000233C345	-
GLYMA10G00390	10:160093-160093	CATATTAGG	downstream_gene_variant	MODIFIER	GLYMA10G00390.2	protein_coding	-	-	-	-	-	-	-	1	-	K7LGP1_SOYBN	UPI000233C211	-
GLYMA10G00420	10:160093-160093	CATATTAGG	upstream_gene_variant	MODIFIER	GLYMA10G00420.1	protein_coding	-	-	-	-	-	-	-	1	-	I1L7C6_SOYBN	UPI000233D685	-
GLYMA10G00390	10:162203-162203	A	downstream_gene_variant	MODIFIER	GLYMA10G00390.2	protein_coding	-	-	-	-	-	-	-	1	-	K7LGP1_SOYBN	UPI000233C211	-
GLYMA10G00420	10:162203-162203	A	intron_variant	MODIFIER	GLYMA10G00420.1	protein_coding	GLYMA10G00420.1:c.-216+840dupA	-	-	-	-	-	-	1	-	I1L7C6_SOYBN	UPI000233D685	-
GLYMA10G00390	10:163425-163426	-	downstream_gene_variant	MODIFIER	GLYMA10G00390.2	protein_coding	-	-	-	-	-	-	-	1	-	K7LGP1_SOYBN	UPI000233C211	-
GLYMA10G00420	10:163425-163426	-	intron_variant	MODIFIER	GLYMA10G00420.1	protein_coding	GLYMA10G00420.1:c.-215-1370delC	-	-	-	-	-	-	1	-	I1L7C6_SOYBN	UPI000233D685	-
GLYMA10G00430	10:173343-173343	G	upstream_gene_variant	MODIFIER	GLYMA10G00430.1	protein_coding	-	-	-	-	-	-	-	-1	-	I1L7C7_SOYBN	UPI00023C9D39	-
GLYMA10G00430	10:174002-174002	ATAATA	upstream_gene_variant	MODIFIER	GLYMA10G00430.1	protein_coding	-	-	-	-	-	-	-	-1	-	I1L7C7_SOYBN	UPI00023C9D39	-
GLYMA10G00430	10:175173-175173	A	upstream_gene_variant	MODIFIER	GLYMA10G00430.1	protein_coding	-	-	-	-	-	-	-	-1	-	I1L7C7_SOYBN	UPI00023C9D39	-
GLYMA10G00430	10:176640-176640	C	upstream_gene_variant	MODIFIER	GLYMA10G00430.1	protein_coding	-	-	-	-	-	-	-	-1	-	I1L7C7_SOYBN	UPI00023C9D39	-
-	10:178019-178019	AAG	intergenic_variant	MODIFIER	-	-	-	-	-	-	-	-	-	-	-	-	-	-
-	10:178137-178138	-	intergenic_variant	MODIFIER	-	-	-	-	-	-	-	-	-	-	-	-	-	-
-	10:178174-178175	-	intergenic_variant	MODIFIER	-	-	-	-	-	-	-	-	-	-	-	-	-	-
-	10:179335-179335	A	intergenic_variant	MODIFIER	-	-	-	-	-	-	-	-	-	-	-	-	-	-
-	10:180011-180011	T	intergenic_variant	MODIFIER	-	-	-	-	-	-	-	-	-	-	-	-	-	-
-	10:180588-180612	-	intergenic_variant	MODIFIER	-	-	-	-	-	-	-	-	-	-	-	-	-	-
-	10:180914-180914	TT	intergenic_variant	MODIFIER	-	-	-	-	-	-	-	-	-	-	-	-	-	-
-	10:182666-182666	TAAAAATATATCA	intergenic_variant	MODIFIER	-	-	-	-	-	-	-	-	-	-	-	-	-	-
-	10:183307-183307	A	intergenic_variant	MODIFIER	-	-	-	-	-	-	-	-	-	-	-	-	-	-
-	10:183461-183462	-	intergenic_variant	MODIFIER	-	-	-	-	-	-	-	-	-	-	-	-	-	-
-	10:183736-183736	A	intergenic_variant	MODIFIER	-	-	-	-	-	-	-	-	-	-	-	-	-	-
-	10:184949-184950	-	intergenic_variant	MODIFIER	-	-	-	-	-	-	-	-	-	-	-	-	-	-
-	10:186580-186580	T	intergenic_variant	MODIFIER	-	-	-	-	-	-	-	-	-	-	-	-	-	-
-	10:189542-189543	-	intergenic_variant	MODIFIER	-	-	-	-	-	-	-	-	-	-	-	-	-	-
-	10:194439-194443	-	intergenic_variant	MODIFIER	-	-	-	-	-	-	-	-	-	-	-	-	-	-
-	10:195323-195335	-	intergenic_variant	MODIFIER	-	-	-	-	-	-	-	-	-	-	-	-	-	-
-	10:195519-195519	GC	intergenic_variant	MODIFIER	-	-	-	-	-	-	-	-	-	-	-	-	-	-
-	10:195522-195523	-	intergenic_variant	MODIFIER	-	-	-	-	-	-	-	-	-	-	-	-	-	-
GLYMA10G00440	10:198760-198760	TACA	upstream_gene_variant	MODIFIER	GLYMA10G00440.1	protein_coding	-	-	-	-	-	-	-	1	-	I1L7C8_SOYBN	UPI000233C7E7	-
GLYMA10G00440	10:200428-200428	A	upstream_gene_variant	MODIFIER	GLYMA10G00440.1	protein_coding	-	-	-	-	-	-	-	1	-	I1L7C8_SOYBN	UPI000233C7E7	-
GLYMA10G00440	10:200439-200439	A	upstream_gene_variant	MODIFIER	GLYMA10G00440.1	protein_coding	-	-	-	-	-	-	-	1	-	I1L7C8_SOYBN	UPI000233C7E7	-
GLYMA10G00440	10:200830-200830	T	upstream_gene_variant	MODIFIER	GLYMA10G00440.1	protein_coding	-	-	-	-	-	-	-	1	-	I1L7C8_SOYBN	UPI000233C7E7	-
GLYMA10G00440	10:207877-207877	T	downstream_gene_variant	MODIFIER	GLYMA10G00440.1	protein_coding	-	-	-	-	-	-	-	1	-	I1L7C8_SOYBN	UPI000233C7E7	-
GLYMA10G00450	10:207877-207877	T	3_prime_UTR_variant	MODIFIER	GLYMA10G00450.1	protein_coding	GLYMA10G00450.1:c.*307dupA	-	2118-2119	-	-	-	-	-1	-	I1L7C9_SOYBN	UPI00023C85A9	-
GLYMA10G00450	10:207877-207877	T	3_prime_UTR_variant	MODIFIER	GLYMA10G00450.2	protein_coding	GLYMA10G00450.2:c.*673dupA	-	2232-2233	-	-	-	-	-1	-	I1L7D0_SOYBN	UPI00023C85AA	-
GLYMA10G00450	10:211258-211258	A	splice_region_variant,intron_variant	LOW	GLYMA10G00450.1	protein_coding	GLYMA10G00450.1:c.278-5dupT	-	-	-	-	-	-	-1	-	I1L7C9_SOYBN	UPI00023C85A9	-
GLYMA10G00450	10:211258-211258	A	splice_region_variant,intron_variant	LOW	GLYMA10G00450.2	protein_coding	GLYMA10G00450.2:c.278-5dupT	-	-	-	-	-	-	-1	-	I1L7D0_SOYBN	UPI00023C85AA	-
GLYMA10G00450	10:213141-213141	T	upstream_gene_variant	MODIFIER	GLYMA10G00450.1	protein_coding	-	-	-	-	-	-	-	-1	-	I1L7C9_SOYBN	UPI00023C85A9	-
GLYMA10G00450	10:213141-213141	T	upstream_gene_variant	MODIFIER	GLYMA10G00450.2	protein_coding	-	-	-	-	-	-	-	-1	-	I1L7D0_SOYBN	UPI00023C85AA	-
GLYMA10G00455	10:213141-213141	T	downstream_gene_variant	MODIFIER	GLYMA10G00455.1	protein_coding	-	-	-	-	-	-	-	-1	-	K7LGP2_SOYBN	UPI0002960234	-
GLYMA10G00455	10:218525-218527	-	upstream_gene_variant	MODIFIER	GLYMA10G00455.1	protein_coding	-	-	-	-	-	-	-	-1	-	K7LGP2_SOYBN	UPI0002960234	-
GLYMA10G00455	10:219908-219908	AA	upstream_gene_variant	MODIFIER	GLYMA10G00455.1	protein_coding	-	-	-	-	-	-	-	-1	-	K7LGP2_SOYBN	UPI0002960234	-
GLYMA10G00455	10:221708-221708	ATAT	upstream_gene_variant	MODIFIER	GLYMA10G00455.1	protein_coding	-	-	-	-	-	-	-	-1	-	K7LGP2_SOYBN	UPI0002960234	-
GLYMA10G00455	10:222664-222664	A	upstream_gene_variant	MODIFIER	GLYMA10G00455.1	protein_coding	-	-	-	-	-	-	-	-1	-	K7LGP2_SOYBN	UPI0002960234	-
GLYMA10G00460	10:222664-222664	A	downstream_gene_variant	MODIFIER	GLYMA10G00460.1	protein_coding	-	-	-	-	-	-	-	-1	-	I1L7D1_SOYBN	UPI000233CDEC	-
GLYMA10G00460	10:223728-223743	-	downstream_gene_variant	MODIFIER	GLYMA10G00460.1	protein_coding	-	-	-	-	-	-	-	-1	-	I1L7D1_SOYBN	UPI000233CDEC	-
GLYMA10G00460	10:225821-225839	-	downstream_gene_variant	MODIFIER	GLYMA10G00460.1	protein_coding	-	-	-	-	-	-	-	-1	-	I1L7D1_SOYBN	UPI000233CDEC	-
GLYMA10G00460	10:225899-225900	-	downstream_gene_variant	MODIFIER	GLYMA10G00460.1	protein_coding	-	-	-	-	-	-	-	-1	-	I1L7D1_SOYBN	UPI000233CDEC	-
GLYMA10G00460	10:227525-227525	A	3_prime_UTR_variant	MODIFIER	GLYMA10G00460.1	protein_coding	GLYMA10G00460.1:c.*32dupT	-	1666-1667	-	-	-	-	-1	-	I1L7D1_SOYBN	UPI000233CDEC	-
GLYMA10G00460	10:229667-229667	T	upstream_gene_variant	MODIFIER	GLYMA10G00460.1	protein_coding	-	-	-	-	-	-	-	-1	-	I1L7D1_SOYBN	UPI000233CDEC	-
GLYMA10G00460	10:231825-231825	A	upstream_gene_variant	MODIFIER	GLYMA10G00460.1	protein_coding	-	-	-	-	-	-	-	-1	-	I1L7D1_SOYBN	UPI000233CDEC	-
GLYMA10G00460	10:232243-232243	T	upstream_gene_variant	MODIFIER	GLYMA10G00460.1	protein_coding	-	-	-	-	-	-	-	-1	-	I1L7D1_SOYBN	UPI000233CDEC	-
GLYMA10G00460	10:233375-233375	A	upstream_gene_variant	MODIFIER	GLYMA10G00460.1	protein_coding	-	-	-	-	-	-	-	-1	-	I1L7D1_SOYBN	UPI000233CDEC	-
-	10:236715-236715	A	intergenic_variant	MODIFIER	-	-	-	-	-	-	-	-	-	-	-	-	-	-
-	10:237642-237642	A	intergenic_variant	MODIFIER	-	-	-	-	-	-	-	-	-	-	-	-	-	-
-	10:240597-240597	A	intergenic_variant	MODIFIER	-	-	-	-	-	-	-	-	-	-	-	-	-	-
-	10:241880-241880	A	intergenic_variant	MODIFIER	-	-	-	-	-	-	-	-	-	-	-	-	-	-
-	10:241980-241980	TTTT	intergenic_variant	MODIFIER	-	-	-	-	-	-	-	-	-	-	-	-	-	-
-	10:242372-242372	G	intergenic_variant	MODIFIER	-	-	-	-	-	-	-	-	-	-	-	-	-	-
GLYMA10G00470	10:243391-243391	AAGTGAA	upstream_gene_variant	MODIFIER	GLYMA10G00470.1	protein_coding	-	-	-	-	-	-	-	1	-	C6T2Y6_SOYBN	UPI0001B15273	-
GLYMA10G00470	10:247502-247502	A	upstream_gene_variant	MODIFIER	GLYMA10G00470.1	protein_coding	-	-	-	-	-	-	-	1	-	C6T2Y6_SOYBN	UPI0001B15273	-
GLYMA10G00470	10:249160-249160	T	intron_variant	MODIFIER	GLYMA10G00470.1	protein_coding	GLYMA10G00470.1:c.315+210dupT	-	-	-	-	-	-	1	-	C6T2Y6_SOYBN	UPI0001B15273	-
GLYMA10G00490	10:249160-249160	T	upstream_gene_variant	MODIFIER	GLYMA10G00490.1	protein_coding	-	-	-	-	-	-	-	1	-	C6TNW3_SOYBN	UPI0001B17124	-
GLYMA10G00470	10:251682-251693	-	downstream_gene_variant	MODIFIER	GLYMA10G00470.1	protein_coding	-	-	-	-	-	-	-	1	-	C6T2Y6_SOYBN	UPI0001B15273	-
GLYMA10G00490	10:251682-251693	-	upstream_gene_variant	MODIFIER	GLYMA10G00490.1	protein_coding	-	-	-	-	-	-	-	1	-	C6TNW3_SOYBN	UPI0001B17124	-
GLYMA10G00470	10:251924-251924	TTT	downstream_gene_variant	MODIFIER	GLYMA10G00470.1	protein_coding	-	-	-	-	-	-	-	1	-	C6T2Y6_SOYBN	UPI0001B15273	-
GLYMA10G00490	10:251924-251924	TTT	upstream_gene_variant	MODIFIER	GLYMA10G00490.1	protein_coding	-	-	-	-	-	-	-	1	-	C6TNW3_SOYBN	UPI0001B17124	-
GLYMA10G00470	10:251978-251980	-	downstream_gene_variant	MODIFIER	GLYMA10G00470.1	protein_coding	-	-	-	-	-	-	-	1	-	C6T2Y6_SOYBN	UPI0001B15273	-
GLYMA10G00490	10:251978-251980	-	upstream_gene_variant	MODIFIER	GLYMA10G00490.1	protein_coding	-	-	-	-	-	-	-	1	-	C6TNW3_SOYBN	UPI0001B17124	-
GLYMA10G00470	10:252599-252599	A	downstream_gene_variant	MODIFIER	GLYMA10G00470.1	protein_coding	-	-	-	-	-	-	-	1	-	C6T2Y6_SOYBN	UPI0001B15273	-
GLYMA10G00490	10:252599-252599	A	upstream_gene_variant	MODIFIER	GLYMA10G00490.1	protein_coding	-	-	-	-	-	-	-	1	-	C6TNW3_SOYBN	UPI0001B17124	-
GLYMA10G00500	10:252599-252599	A	upstream_gene_variant	MODIFIER	GLYMA10G00500.1	protein_coding	-	-	-	-	-	-	-	1	-	I1L7D4_SOYBN	UPI000233D7FF	-
GLYMA10G00470	10:253035-253037	-	downstream_gene_variant	MODIFIER	GLYMA10G00470.1	protein_coding	-	-	-	-	-	-	-	1	-	C6T2Y6_SOYBN	UPI0001B15273	-
GLYMA10G00490	10:253035-253037	-	upstream_gene_variant	MODIFIER	GLYMA10G00490.1	protein_coding	-	-	-	-	-	-	-	1	-	C6TNW3_SOYBN	UPI0001B17124	-
GLYMA10G00500	10:253035-253037	-	upstream_gene_variant	MODIFIER	GLYMA10G00500.1	protein_coding	-	-	-	-	-	-	-	1	-	I1L7D4_SOYBN	UPI000233D7FF	-
GLYMA10G00470	10:253038-253048	-	downstream_gene_variant	MODIFIER	GLYMA10G00470.1	protein_coding	-	-	-	-	-	-	-	1	-	C6T2Y6_SOYBN	UPI0001B15273	-
GLYMA10G00490	10:253038-253048	-	upstream_gene_variant	MODIFIER	GLYMA10G00490.1	protein_coding	-	-	-	-	-	-	-	1	-	C6TNW3_SOYBN	UPI0001B17124	-
GLYMA10G00500	10:253038-253048	-	upstream_gene_variant	MODIFIER	GLYMA10G00500.1	protein_coding	-	-	-	-	-	-	-	1	-	I1L7D4_SOYBN	UPI000233D7FF	-
GLYMA10G00490	10:256463-256463	A	downstream_gene_variant	MODIFIER	GLYMA10G00490.1	protein_coding	-	-	-	-	-	-	-	1	-	C6TNW3_SOYBN	UPI0001B17124	-
GLYMA10G00500	10:256463-256463	A	upstream_gene_variant	MODIFIER	GLYMA10G00500.1	protein_coding	-	-	-	-	-	-	-	1	-	I1L7D4_SOYBN	UPI000233D7FF	-
GLYMA10G00490	10:259041-259041	A	downstream_gene_variant	MODIFIER	GLYMA10G00490.1	protein_coding	-	-	-	-	-	-	-	1	-	C6TNW3_SOYBN	UPI0001B17124	-
GLYMA10G00500	10:259041-259041	A	downstream_gene_variant	MODIFIER	GLYMA10G00500.1	protein_coding	-	-	-	-	-	-	-	1	-	I1L7D4_SOYBN	UPI000233D7FF	-
GLYMA10G00510	10:259041-259041	A	downstream_gene_variant	MODIFIER	GLYMA10G00510.1	protein_coding	-	-	-	-	-	-	-	-1	-	C6TAB5_SOYBN	UPI0001B160B2	-
GLYMA10G00510	10:259041-259041	A	downstream_gene_variant	MODIFIER	GLYMA10G00510.2	protein_coding	-	-	-	-	-	-	-	-1	-	C6TAB5_SOYBN	UPI0001B160B2	-
GLYMA10G00490	10:259123-259123	T	downstream_gene_variant	MODIFIER	GLYMA10G00490.1	protein_coding	-	-	-	-	-	-	-	1	-	C6TNW3_SOYBN	UPI0001B17124	-
GLYMA10G00500	10:259123-259123	T	downstream_gene_variant	MODIFIER	GLYMA10G00500.1	protein_coding	-	-	-	-	-	-	-	1	-	I1L7D4_SOYBN	UPI000233D7FF	-
GLYMA10G00510	10:259123-259123	T	downstream_gene_variant	MODIFIER	GLYMA10G00510.1	protein_coding	-	-	-	-	-	-	-	-1	-	C6TAB5_SOYBN	UPI0001B160B2	-
GLYMA10G00510	10:259123-259123	T	downstream_gene_variant	MODIFIER	GLYMA10G00510.2	protein_coding	-	-	-	-	-	-	-	-1	-	C6TAB5_SOYBN	UPI0001B160B2	-
GLYMA10G00520	10:274327-274329	-	intron_variant	MODIFIER	GLYMA10G00520.3	protein_coding	GLYMA10G00520.3:c.245-241_245-240delGC	-	-	-	-	-	-	1	-	K7LGP4_SOYBN	UPI00023C85AE	-
GLYMA10G00520	10:274327-274329	-	intron_variant	MODIFIER	GLYMA10G00520.4	protein_coding	GLYMA10G00520.4:c.183-245_183-244delGC	-	-	-	-	-	-	1	-	C6THQ5_SOYBN	UPI0001B167AA	-
GLYMA10G00520	10:274555-274556	-	intron_variant	MODIFIER	GLYMA10G00520.3	protein_coding	GLYMA10G00520.3:c.245-13delA	-	-	-	-	-	-	1	-	K7LGP4_SOYBN	UPI00023C85AE	-
GLYMA10G00520	10:274555-274556	-	intron_variant	MODIFIER	GLYMA10G00520.4	protein_coding	GLYMA10G00520.4:c.183-17delA	-	-	-	-	-	-	1	-	C6THQ5_SOYBN	UPI0001B167AA	-
GLYMA10G00520	10:276653-276653	T	downstream_gene_variant	MODIFIER	GLYMA10G00520.3	protein_coding	-	-	-	-	-	-	-	1	-	K7LGP4_SOYBN	UPI00023C85AE	-
GLYMA10G00520	10:276653-276653	T	downstream_gene_variant	MODIFIER	GLYMA10G00520.4	protein_coding	-	-	-	-	-	-	-	1	-	C6THQ5_SOYBN	UPI0001B167AA	-
GLYMA10G00520	10:276682-276685	-	downstream_gene_variant	MODIFIER	GLYMA10G00520.3	protein_coding	-	-	-	-	-	-	-	1	-	K7LGP4_SOYBN	UPI00023C85AE	-
GLYMA10G00520	10:276682-276685	-	downstream_gene_variant	MODIFIER	GLYMA10G00520.4	protein_coding	-	-	-	-	-	-	-	1	-	C6THQ5_SOYBN	UPI0001B167AA	-
GLYMA10G00520	10:276694-276694	TGTTTTTT	downstream_gene_variant	MODIFIER	GLYMA10G00520.3	protein_coding	-	-	-	-	-	-	-	1	-	K7LGP4_SOYBN	UPI00023C85AE	-
GLYMA10G00520	10:276694-276694	TGTTTTTT	downstream_gene_variant	MODIFIER	GLYMA10G00520.4	protein_coding	-	-	-	-	-	-	-	1	-	C6THQ5_SOYBN	UPI0001B167AA	-
GLYMA10G00520	10:277797-277798	-	downstream_gene_variant	MODIFIER	GLYMA10G00520.3	protein_coding	-	-	-	-	-	-	-	1	-	K7LGP4_SOYBN	UPI00023C85AE	-
GLYMA10G00520	10:277797-277798	-	downstream_gene_variant	MODIFIER	GLYMA10G00520.4	protein_coding	-	-	-	-	-	-	-	1	-	C6THQ5_SOYBN	UPI0001B167AA	-
GLYMA10G00520	10:277878-277879	-	downstream_gene_variant	MODIFIER	GLYMA10G00520.3	protein_coding	-	-	-	-	-	-	-	1	-	K7LGP4_SOYBN	UPI00023C85AE	-
GLYMA10G00520	10:277878-277879	-	downstream_gene_variant	MODIFIER	GLYMA10G00520.4	protein_coding	-	-	-	-	-	-	-	1	-	C6THQ5_SOYBN	UPI0001B167AA	-
GLYMA10G00520	10:279079-279079	A	downstream_gene_variant	MODIFIER	GLYMA10G00520.3	protein_coding	-	-	-	-	-	-	-	1	-	K7LGP4_SOYBN	UPI00023C85AE	-
GLYMA10G00520	10:279079-279079	A	downstream_gene_variant	MODIFIER	GLYMA10G00520.4	protein_coding	-	-	-	-	-	-	-	1	-	C6THQ5_SOYBN	UPI0001B167AA	-
GLYMA10G00520	10:279098-279099	-	downstream_gene_variant	MODIFIER	GLYMA10G00520.3	protein_coding	-	-	-	-	-	-	-	1	-	K7LGP4_SOYBN	UPI00023C85AE	-
GLYMA10G00520	10:279098-279099	-	downstream_gene_variant	MODIFIER	GLYMA10G00520.4	protein_coding	-	-	-	-	-	-	-	1	-	C6THQ5_SOYBN	UPI0001B167AA	-
GLYMA10G00520	10:279101-279102	-	downstream_gene_variant	MODIFIER	GLYMA10G00520.3	protein_coding	-	-	-	-	-	-	-	1	-	K7LGP4_SOYBN	UPI00023C85AE	-
GLYMA10G00520	10:279101-279102	-	downstream_gene_variant	MODIFIER	GLYMA10G00520.4	protein_coding	-	-	-	-	-	-	-	1	-	C6THQ5_SOYBN	UPI0001B167AA	-
GLYMA10G00520	10:279893-279893	CC	downstream_gene_variant	MODIFIER	GLYMA10G00520.3	protein_coding	-	-	-	-	-	-	-	1	-	K7LGP4_SOYBN	UPI00023C85AE	-
GLYMA10G00520	10:279893-279893	CC	downstream_gene_variant	MODIFIER	GLYMA10G00520.4	protein_coding	-	-	-	-	-	-	-	1	-	C6THQ5_SOYBN	UPI0001B167AA	-
-	10:280912-280912	A	intergenic_variant	MODIFIER	-	-	-	-	-	-	-	-	-	-	-	-	-	-
-	10:281538-281552	-	intergenic_variant	MODIFIER	-	-	-	-	-	-	-	-	-	-	-	-	-	-
-	10:282117-282117	AA	intergenic_variant	MODIFIER	-	-	-	-	-	-	-	-	-	-	-	-	-	-
-	10:283646-283646	ATATATATATAT	intergenic_variant	MODIFIER	-	-	-	-	-	-	-	-	-	-	-	-	-	-
-	10:283658-283658	ATAT	intergenic_variant	MODIFIER	-	-	-	-	-	-	-	-	-	-	-	-	-	-
-	10:285560-285560	T	intergenic_variant	MODIFIER	-	-	-	-	-	-	-	-	-	-	-	-	-	-
GLYMA10G00527	10:287001-287002	-	upstream_gene_variant	MODIFIER	GLYMA10G00527.1	protein_coding	-	-	-	-	-	-	-	1	-	K7LGP6_SOYBN	UPI00029660E5	-
GLYMA10G00527	10:287003-287006	-	upstream_gene_variant	MODIFIER	GLYMA10G00527.1	protein_coding	-	-	-	-	-	-	-	1	-	K7LGP6_SOYBN	UPI00029660E5	-
GLYMA10G00527	10:288648-288648	A	upstream_gene_variant	MODIFIER	GLYMA10G00527.1	protein_coding	-	-	-	-	-	-	-	1	-	K7LGP6_SOYBN	UPI00029660E5	-
GLYMA10G00527	10:289926-289929	-	upstream_gene_variant	MODIFIER	GLYMA10G00527.1	protein_coding	-	-	-	-	-	-	-	1	-	K7LGP6_SOYBN	UPI00029660E5	-
GLYMA10G00527	10:290095-290095	TCTTC	upstream_gene_variant	MODIFIER	GLYMA10G00527.1	protein_coding	-	-	-	-	-	-	-	1	-	K7LGP6_SOYBN	UPI00029660E5	-
GLYMA10G00527	10:292257-292257	A	intron_variant	MODIFIER	GLYMA10G00527.1	protein_coding	GLYMA10G00527.1:c.644+49dupA	-	-	-	-	-	-	1	-	K7LGP6_SOYBN	UPI00029660E5	-
GLYMA10G00527	10:292284-292284	TG	intron_variant	MODIFIER	GLYMA10G00527.1	protein_coding	GLYMA10G00527.1:c.645-58_645-57dupGT	-	-	-	-	-	-	1	-	K7LGP6_SOYBN	UPI00029660E5	-
GLYMA10G00527	10:294014-294014	TATATGACTATA	stop_gained,inframe_insertion	HIGH	GLYMA10G00527.1	protein_coding	GLYMA10G00527.1:c.1415_1416insTATATGACTATA	GLYMA10G00527.1:p.Leu472_Ala473insIleTerLeuTer	1415-1416	1415-1416	472	L/LI*L*	cta/ctTATATGACTATAa	1	-	K7LGP6_SOYBN	UPI00029660E5	PANTHER:PTHR22891,PANTHER:PTHR22891:SF45
GLYMA10G00527	10:297408-297408	TA	intron_variant	MODIFIER	GLYMA10G00527.1	protein_coding	GLYMA10G00527.1:c.2547+241_2547+242dupTA	-	-	-	-	-	-	1	-	K7LGP6_SOYBN	UPI00029660E5	-
GLYMA10G00534	10:297408-297408	TA	upstream_gene_variant	MODIFIER	GLYMA10G00534.1	protein_coding	-	-	-	-	-	-	-	1	-	K7LGP7_SOYBN	UPI000233C212	-
GLYMA10G00527	10:298972-298973	-	downstream_gene_variant	MODIFIER	GLYMA10G00527.1	protein_coding	-	-	-	-	-	-	-	1	-	K7LGP6_SOYBN	UPI00029660E5	-
GLYMA10G00534	10:298972-298973	-	upstream_gene_variant	MODIFIER	GLYMA10G00534.1	protein_coding	-	-	-	-	-	-	-	1	-	K7LGP7_SOYBN	UPI000233C212	-
GLYMA10G00542	10:298972-298973	-	upstream_gene_variant	MODIFIER	GLYMA10G00542.1	protein_coding	-	-	-	-	-	-	-	1	-	K7LGP8_SOYBN	UPI000233CF76	-
GLYMA10G00527	10:299088-299088	T	downstream_gene_variant	MODIFIER	GLYMA10G00527.1	protein_coding	-	-	-	-	-	-	-	1	-	K7LGP6_SOYBN	UPI00029660E5	-
GLYMA10G00534	10:299088-299088	T	upstream_gene_variant	MODIFIER	GLYMA10G00534.1	protein_coding	-	-	-	-	-	-	-	1	-	K7LGP7_SOYBN	UPI000233C212	-
GLYMA10G00542	10:299088-299088	T	upstream_gene_variant	MODIFIER	GLYMA10G00542.1	protein_coding	-	-	-	-	-	-	-	1	-	K7LGP8_SOYBN	UPI000233CF76	-
GLYMA10G00527	10:299148-299154	-	downstream_gene_variant	MODIFIER	GLYMA10G00527.1	protein_coding	-	-	-	-	-	-	-	1	-	K7LGP6_SOYBN	UPI00029660E5	-
GLYMA10G00534	10:299148-299154	-	upstream_gene_variant	MODIFIER	GLYMA10G00534.1	protein_coding	-	-	-	-	-	-	-	1	-	K7LGP7_SOYBN	UPI000233C212	-
GLYMA10G00542	10:299148-299154	-	upstream_gene_variant	MODIFIER	GLYMA10G00542.1	protein_coding	-	-	-	-	-	-	-	1	-	K7LGP8_SOYBN	UPI000233CF76	-
GLYMA10G00534	10:304381-304383	-	downstream_gene_variant	MODIFIER	GLYMA10G00534.1	protein_coding	-	-	-	-	-	-	-	1	-	K7LGP7_SOYBN	UPI000233C212	-
GLYMA10G00542	10:304381-304383	-	intron_variant	MODIFIER	GLYMA10G00542.1	protein_coding	GLYMA10G00542.1:c.138+116_138+117delCT	-	-	-	-	-	-	1	-	K7LGP8_SOYBN	UPI000233CF76	-
GLYMA10G00550	10:304381-304383	-	downstream_gene_variant	MODIFIER	GLYMA10G00550.1	protein_coding	-	-	-	-	-	-	-	-1	-	I1L7E1_SOYBN	UPI000233D0F8	-
GLYMA10G00534	10:308626-308627	-	downstream_gene_variant	MODIFIER	GLYMA10G00534.1	protein_coding	-	-	-	-	-	-	-	1	-	K7LGP7_SOYBN	UPI000233C212	-
GLYMA10G00542	10:308626-308627	-	downstream_gene_variant	MODIFIER	GLYMA10G00542.1	protein_coding	-	-	-	-	-	-	-	1	-	K7LGP8_SOYBN	UPI000233CF76	-
GLYMA10G00550	10:308626-308627	-	intron_variant	MODIFIER	GLYMA10G00550.1	protein_coding	GLYMA10G00550.1:c.2079+178delT	-	-	-	-	-	-	-1	-	I1L7E1_SOYBN	UPI000233D0F8	-
GLYMA10G00550	10:311106-311107	-	intron_variant	MODIFIER	GLYMA10G00550.1	protein_coding	GLYMA10G00550.1:c.1419+154delT	-	-	-	-	-	-	-1	-	I1L7E1_SOYBN	UPI000233D0F8	-
GLYMA10G00550	10:315535-315535	A	upstream_gene_variant	MODIFIER	GLYMA10G00550.1	protein_coding	-	-	-	-	-	-	-	-1	-	I1L7E1_SOYBN	UPI000233D0F8	-
GLYMA10G00550	10:316884-316884	T	upstream_gene_variant	MODIFIER	GLYMA10G00550.1	protein_coding	-	-	-	-	-	-	-	-1	-	I1L7E1_SOYBN	UPI000233D0F8	-
GLYMA10G00560	10:316884-316884	T	downstream_gene_variant	MODIFIER	GLYMA10G00560.1	protein_coding	-	-	-	-	-	-	-	-1	-	I1L7E2_SOYBN	UPI000233C213	-
GLYMA10G00550	10:318107-318108	-	upstream_gene_variant	MODIFIER	GLYMA10G00550.1	protein_coding	-	-	-	-	-	-	-	-1	-	I1L7E1_SOYBN	UPI000233D0F8	-
GLYMA10G00560	10:318107-318108	-	downstream_gene_variant	MODIFIER	GLYMA10G00560.1	protein_coding	-	-	-	-	-	-	-	-1	-	I1L7E2_SOYBN	UPI000233C213	-
GLYMA10G00550	10:318140-318142	-	upstream_gene_variant	MODIFIER	GLYMA10G00550.1	protein_coding	-	-	-	-	-	-	-	-1	-	I1L7E1_SOYBN	UPI000233D0F8	-
GLYMA10G00560	10:318140-318142	-	downstream_gene_variant	MODIFIER	GLYMA10G00560.1	protein_coding	-	-	-	-	-	-	-	-1	-	I1L7E2_SOYBN	UPI000233C213	-
GLYMA10G00550	10:319389-319389	C	upstream_gene_variant	MODIFIER	GLYMA10G00550.1	protein_coding	-	-	-	-	-	-	-	-1	-	I1L7E1_SOYBN	UPI000233D0F8	-
GLYMA10G00560	10:319389-319389	C	downstream_gene_variant	MODIFIER	GLYMA10G00560.1	protein_coding	-	-	-	-	-	-	-	-1	-	I1L7E2_SOYBN	UPI000233C213	-
GLYMA10G00550	10:319423-319425	-	upstream_gene_variant	MODIFIER	GLYMA10G00550.1	protein_coding	-	-	-	-	-	-	-	-1	-	I1L7E1_SOYBN	UPI000233D0F8	-
GLYMA10G00560	10:319423-319425	-	downstream_gene_variant	MODIFIER	GLYMA10G00560.1	protein_coding	-	-	-	-	-	-	-	-1	-	I1L7E2_SOYBN	UPI000233C213	-
GLYMA10G00550	10:319430-319433	-	upstream_gene_variant	MODIFIER	GLYMA10G00550.1	protein_coding	-	-	-	-	-	-	-	-1	-	I1L7E1_SOYBN	UPI000233D0F8	-
GLYMA10G00560	10:319430-319433	-	downstream_gene_variant	MODIFIER	GLYMA10G00560.1	protein_coding	-	-	-	-	-	-	-	-1	-	I1L7E2_SOYBN	UPI000233C213	-
GLYMA10G00550	10:319529-319529	A	upstream_gene_variant	MODIFIER	GLYMA10G00550.1	protein_coding	-	-	-	-	-	-	-	-1	-	I1L7E1_SOYBN	UPI000233D0F8	-
GLYMA10G00560	10:319529-319529	A	downstream_gene_variant	MODIFIER	GLYMA10G00560.1	protein_coding	-	-	-	-	-	-	-	-1	-	I1L7E2_SOYBN	UPI000233C213	-
GLYMA10G00550	10:319609-319609	T	upstream_gene_variant	MODIFIER	GLYMA10G00550.1	protein_coding	-	-	-	-	-	-	-	-1	-	I1L7E1_SOYBN	UPI000233D0F8	-
GLYMA10G00560	10:319609-319609	T	downstream_gene_variant	MODIFIER	GLYMA10G00560.1	protein_coding	-	-	-	-	-	-	-	-1	-	I1L7E2_SOYBN	UPI000233C213	-
GLYMA10G00550	10:319830-319830	AAA	upstream_gene_variant	MODIFIER	GLYMA10G00550.1	protein_coding	-	-	-	-	-	-	-	-1	-	I1L7E1_SOYBN	UPI000233D0F8	-
GLYMA10G00560	10:319830-319830	AAA	downstream_gene_variant	MODIFIER	GLYMA10G00560.1	protein_coding	-	-	-	-	-	-	-	-1	-	I1L7E2_SOYBN	UPI000233C213	-
GLYMA10G00560	10:323523-323524	-	upstream_gene_variant	MODIFIER	GLYMA10G00560.1	protein_coding	-	-	-	-	-	-	-	-1	-	I1L7E2_SOYBN	UPI000233C213	-
GLYMA10G00570	10:323523-323524	-	downstream_gene_variant	MODIFIER	GLYMA10G00570.1	protein_coding	-	-	-	-	-	-	-	-1	-	I1L7E3_SOYBN	UPI000233D3BF	-
GLYMA10G00560	10:324214-324214	TA	upstream_gene_variant	MODIFIER	GLYMA10G00560.1	protein_coding	-	-	-	-	-	-	-	-1	-	I1L7E2_SOYBN	UPI000233C213	-
GLYMA10G00570	10:324214-324214	TA	downstream_gene_variant	MODIFIER	GLYMA10G00570.1	protein_coding	-	-	-	-	-	-	-	-1	-	I1L7E3_SOYBN	UPI000233D3BF	-
GLYMA10G00560	10:324238-324238	T	upstream_gene_variant	MODIFIER	GLYMA10G00560.1	protein_coding	-	-	-	-	-	-	-	-1	-	I1L7E2_SOYBN	UPI000233C213	-
GLYMA10G00570	10:324238-324238	T	downstream_gene_variant	MODIFIER	GLYMA10G00570.1	protein_coding	-	-	-	-	-	-	-	-1	-	I1L7E3_SOYBN	UPI000233D3BF	-
GLYMA10G00570	10:333138-333138	A	upstream_gene_variant	MODIFIER	GLYMA10G00570.1	protein_coding	-	-	-	-	-	-	-	-1	-	I1L7E3_SOYBN	UPI000233D3BF	-
GLYMA10G00580	10:333138-333138	A	upstream_gene_variant	MODIFIER	GLYMA10G00580.1	protein_coding	-	-	-	-	-	-	-	-1	-	I1L7E4_SOYBN	UPI00029604AE	-
GLYMA10G00600	10:333138-333138	A	downstream_gene_variant	MODIFIER	GLYMA10G00600.1	protein_coding	-	-	-	-	-	-	-	-1	-	I1L7E5_SOYBN	UPI000233D541	-
GLYMA10G00600	10:333138-333138	A	downstream_gene_variant	MODIFIER	GLYMA10G00600.2	protein_coding	-	-	-	-	-	-	-	-1	-	K7LGP9_SOYBN	UPI00023C85B8	-
GLYMA10G00600	10:339072-339072	G	intron_variant	MODIFIER	GLYMA10G00600.1	protein_coding	GLYMA10G00600.1:c.430-490dupC	-	-	-	-	-	-	-1	-	I1L7E5_SOYBN	UPI000233D541	-
GLYMA10G00600	10:339072-339072	G	intron_variant	MODIFIER	GLYMA10G00600.2	protein_coding	GLYMA10G00600.2:c.427-490dupC	-	-	-	-	-	-	-1	-	K7LGP9_SOYBN	UPI00023C85B8	-
GLYMA10G00600	10:341851-341851	T	upstream_gene_variant	MODIFIER	GLYMA10G00600.1	protein_coding	-	-	-	-	-	-	-	-1	-	I1L7E5_SOYBN	UPI000233D541	-
GLYMA10G00600	10:341851-341851	T	upstream_gene_variant	MODIFIER	GLYMA10G00600.2	protein_coding	-	-	-	-	-	-	-	-1	-	K7LGP9_SOYBN	UPI00023C85B8	-
GLYMA10G00600	10:341917-341918	-	upstream_gene_variant	MODIFIER	GLYMA10G00600.1	protein_coding	-	-	-	-	-	-	-	-1	-	I1L7E5_SOYBN	UPI000233D541	-
GLYMA10G00600	10:341917-341918	-	upstream_gene_variant	MODIFIER	GLYMA10G00600.2	protein_coding	-	-	-	-	-	-	-	-1	-	K7LGP9_SOYBN	UPI00023C85B8	-
GLYMA10G00600	10:342106-342106	A	upstream_gene_variant	MODIFIER	GLYMA10G00600.1	protein_coding	-	-	-	-	-	-	-	-1	-	I1L7E5_SOYBN	UPI000233D541	-
GLYMA10G00600	10:342106-342106	A	upstream_gene_variant	MODIFIER	GLYMA10G00600.2	protein_coding	-	-	-	-	-	-	-	-1	-	K7LGP9_SOYBN	UPI00023C85B8	-
GLYMA10G00600	10:342120-342122	-	upstream_gene_variant	MODIFIER	GLYMA10G00600.1	protein_coding	-	-	-	-	-	-	-	-1	-	I1L7E5_SOYBN	UPI000233D541	-
GLYMA10G00600	10:342120-342122	-	upstream_gene_variant	MODIFIER	GLYMA10G00600.2	protein_coding	-	-	-	-	-	-	-	-1	-	K7LGP9_SOYBN	UPI00023C85B8	-
GLYMA10G00600	10:342157-342161	-	upstream_gene_variant	MODIFIER	GLYMA10G00600.1	protein_coding	-	-	-	-	-	-	-	-1	-	I1L7E5_SOYBN	UPI000233D541	-
GLYMA10G00600	10:342157-342161	-	upstream_gene_variant	MODIFIER	GLYMA10G00600.2	protein_coding	-	-	-	-	-	-	-	-1	-	K7LGP9_SOYBN	UPI00023C85B8	-
GLYMA10G00600	10:342316-342318	-	upstream_gene_variant	MODIFIER	GLYMA10G00600.1	protein_coding	-	-	-	-	-	-	-	-1	-	I1L7E5_SOYBN	UPI000233D541	-
GLYMA10G00600	10:342316-342318	-	upstream_gene_variant	MODIFIER	GLYMA10G00600.2	protein_coding	-	-	-	-	-	-	-	-1	-	K7LGP9_SOYBN	UPI00023C85B8	-
GLYMA10G00600	10:342786-342799	-	upstream_gene_variant	MODIFIER	GLYMA10G00600.1	protein_coding	-	-	-	-	-	-	-	-1	-	I1L7E5_SOYBN	UPI000233D541	-
GLYMA10G00600	10:342786-342799	-	upstream_gene_variant	MODIFIER	GLYMA10G00600.2	protein_coding	-	-	-	-	-	-	-	-1	-	K7LGP9_SOYBN	UPI00023C85B8	-
GLYMA10G00600	10:344229-344229	CAA	upstream_gene_variant	MODIFIER	GLYMA10G00600.1	protein_coding	-	-	-	-	-	-	-	-1	-	I1L7E5_SOYBN	UPI000233D541	-
GLYMA10G00600	10:344229-344229	CAA	upstream_gene_variant	MODIFIER	GLYMA10G00600.2	protein_coding	-	-	-	-	-	-	-	-1	-	K7LGP9_SOYBN	UPI00023C85B8	-
GLYMA10G00600	10:345752-345752	A	upstream_gene_variant	MODIFIER	GLYMA10G00600.1	protein_coding	-	-	-	-	-	-	-	-1	-	I1L7E5_SOYBN	UPI000233D541	-
GLYMA10G00600	10:345752-345752	A	upstream_gene_variant	MODIFIER	GLYMA10G00600.2	protein_coding	-	-	-	-	-	-	-	-1	-	K7LGP9_SOYBN	UPI00023C85B8	-
GLYMA10G00600	10:345753-345753	TC	upstream_gene_variant	MODIFIER	GLYMA10G00600.1	protein_coding	-	-	-	-	-	-	-	-1	-	I1L7E5_SOYBN	UPI000233D541	-
GLYMA10G00600	10:345753-345753	TC	upstream_gene_variant	MODIFIER	GLYMA10G00600.2	protein_coding	-	-	-	-	-	-	-	-1	-	K7LGP9_SOYBN	UPI00023C85B8	-
-	10:347440-347441	-	intergenic_variant	MODIFIER	-	-	-	-	-	-	-	-	-	-	-	-	-	-
-	10:347693-347693	A	intergenic_variant	MODIFIER	-	-	-	-	-	-	-	-	-	-	-	-	-	-
-	10:349278-349279	-	intergenic_variant	MODIFIER	-	-	-	-	-	-	-	-	-	-	-	-	-	-
-	10:349361-349361	T	intergenic_variant	MODIFIER	-	-	-	-	-	-	-	-	-	-	-	-	-	-
-	10:349900-349900	ATTTTCTT	intergenic_variant	MODIFIER	-	-	-	-	-	-	-	-	-	-	-	-	-	-
-	10:350253-350253	GACTTGAAA	intergenic_variant	MODIFIER	-	-	-	-	-	-	-	-	-	-	-	-	-	-
-	10:351389-351393	-	intergenic_variant	MODIFIER	-	-	-	-	-	-	-	-	-	-	-	-	-	-
-	10:351409-351409	TTAA	intergenic_variant	MODIFIER	-	-	-	-	-	-	-	-	-	-	-	-	-	-
-	10:352652-352652	T	intergenic_variant	MODIFIER	-	-	-	-	-	-	-	-	-	-	-	-	-	-
-	10:353375-353375	G	intergenic_variant	MODIFIER	-	-	-	-	-	-	-	-	-	-	-	-	-	-
-	10:355589-355589	TA	intergenic_variant	MODIFIER	-	-	-	-	-	-	-	-	-	-	-	-	-	-
-	10:355666-355666	A	intergenic_variant	MODIFIER	-	-	-	-	-	-	-	-	-	-	-	-	-	-
-	10:357204-357204	A	intergenic_variant	MODIFIER	-	-	-	-	-	-	-	-	-	-	-	-	-	-
GLYMA10G00610	10:359160-359160	AAAAATAAT	upstream_gene_variant	MODIFIER	GLYMA10G00610.1	protein_coding	-	-	-	-	-	-	-	1	-	C6T8U3_SOYBN	UPI0001B162FF	-
GLYMA10G00610	10:359160-359160	AAAAATAAT	upstream_gene_variant	MODIFIER	GLYMA10G00610.3	protein_coding	-	-	-	-	-	-	-	1	-	I1L7E8_SOYBN	UPI00023C8730	-
GLYMA10G00610	10:359160-359160	AAAAATAAT	upstream_gene_variant	MODIFIER	GLYMA10G00610.4	protein_coding	-	-	-	-	-	-	-	1	-	C6T8U3_SOYBN	UPI0001B162FF	-
GLYMA10G00610	10:361379-361379	AAG	upstream_gene_variant	MODIFIER	GLYMA10G00610.1	protein_coding	-	-	-	-	-	-	-	1	-	C6T8U3_SOYBN	UPI0001B162FF	-
GLYMA10G00610	10:361379-361379	AAG	upstream_gene_variant	MODIFIER	GLYMA10G00610.3	protein_coding	-	-	-	-	-	-	-	1	-	I1L7E8_SOYBN	UPI00023C8730	-
GLYMA10G00610	10:361379-361379	AAG	upstream_gene_variant	MODIFIER	GLYMA10G00610.4	protein_coding	-	-	-	-	-	-	-	1	-	C6T8U3_SOYBN	UPI0001B162FF	-
GLYMA10G00610	10:361507-361507	ATTCTA	upstream_gene_variant	MODIFIER	GLYMA10G00610.1	protein_coding	-	-	-	-	-	-	-	1	-	C6T8U3_SOYBN	UPI0001B162FF	-
GLYMA10G00610	10:361507-361507	ATTCTA	upstream_gene_variant	MODIFIER	GLYMA10G00610.3	protein_coding	-	-	-	-	-	-	-	1	-	I1L7E8_SOYBN	UPI00023C8730	-
GLYMA10G00610	10:361507-361507	ATTCTA	upstream_gene_variant	MODIFIER	GLYMA10G00610.4	protein_coding	-	-	-	-	-	-	-	1	-	C6T8U3_SOYBN	UPI0001B162FF	-
GLYMA10G00610	10:362040-362040	T	upstream_gene_variant	MODIFIER	GLYMA10G00610.1	protein_coding	-	-	-	-	-	-	-	1	-	C6T8U3_SOYBN	UPI0001B162FF	-
GLYMA10G00610	10:362040-362040	T	upstream_gene_variant	MODIFIER	GLYMA10G00610.3	protein_coding	-	-	-	-	-	-	-	1	-	I1L7E8_SOYBN	UPI00023C8730	-
GLYMA10G00610	10:362040-362040	T	upstream_gene_variant	MODIFIER	GLYMA10G00610.4	protein_coding	-	-	-	-	-	-	-	1	-	C6T8U3_SOYBN	UPI0001B162FF	-
GLYMA10G00610	10:362751-362751	A	upstream_gene_variant	MODIFIER	GLYMA10G00610.1	protein_coding	-	-	-	-	-	-	-	1	-	C6T8U3_SOYBN	UPI0001B162FF	-
GLYMA10G00610	10:362751-362751	A	upstream_gene_variant	MODIFIER	GLYMA10G00610.3	protein_coding	-	-	-	-	-	-	-	1	-	I1L7E8_SOYBN	UPI00023C8730	-
GLYMA10G00610	10:362751-362751	A	upstream_gene_variant	MODIFIER	GLYMA10G00610.4	protein_coding	-	-	-	-	-	-	-	1	-	C6T8U3_SOYBN	UPI0001B162FF	-
GLYMA10G00610	10:365653-365655	-	intron_variant	MODIFIER	GLYMA10G00610.1	protein_coding	GLYMA10G00610.1:c.358-164_358-163delTT	-	-	-	-	-	-	1	-	C6T8U3_SOYBN	UPI0001B162FF	-
GLYMA10G00610	10:365653-365655	-	intron_variant	MODIFIER	GLYMA10G00610.3	protein_coding	GLYMA10G00610.3:c.358-164_358-163delTT	-	-	-	-	-	-	1	-	I1L7E8_SOYBN	UPI00023C8730	-
GLYMA10G00610	10:365653-365655	-	intron_variant	MODIFIER	GLYMA10G00610.4	protein_coding	GLYMA10G00610.4:c.358-164_358-163delTT	-	-	-	-	-	-	1	-	C6T8U3_SOYBN	UPI0001B162FF	-
GLYMA10G00610	10:366693-366693	ATT	splice_region_variant,intron_variant	LOW	GLYMA10G00610.1	protein_coding	GLYMA10G00610.1:c.846+22_846+24dupATT	-	-	-	-	-	-	1	-	C6T8U3_SOYBN	UPI0001B162FF	-
GLYMA10G00610	10:366693-366693	ATT	splice_region_variant,intron_variant	LOW	GLYMA10G00610.3	protein_coding	GLYMA10G00610.3:c.846+22_846+24dupATT	-	-	-	-	-	-	1	-	I1L7E8_SOYBN	UPI00023C8730	-
GLYMA10G00610	10:366693-366693	ATT	splice_region_variant,intron_variant	LOW	GLYMA10G00610.4	protein_coding	GLYMA10G00610.4:c.846+22_846+24dupATT	-	-	-	-	-	-	1	-	C6T8U3_SOYBN	UPI0001B162FF	-
GLYMA10G00610	10:367267-367267	T	intron_variant	MODIFIER	GLYMA10G00610.1	protein_coding	GLYMA10G00610.1:c.919-20dupT	-	-	-	-	-	-	1	-	C6T8U3_SOYBN	UPI0001B162FF	-
GLYMA10G00610	10:367267-367267	T	intron_variant	MODIFIER	GLYMA10G00610.3	protein_coding	GLYMA10G00610.3:c.919-20dupT	-	-	-	-	-	-	1	-	I1L7E8_SOYBN	UPI00023C8730	-
GLYMA10G00610	10:367267-367267	T	intron_variant	MODIFIER	GLYMA10G00610.4	protein_coding	GLYMA10G00610.4:c.919-20dupT	-	-	-	-	-	-	1	-	C6T8U3_SOYBN	UPI0001B162FF	-
GLYMA10G00610	10:367783-367783	A	intron_variant	MODIFIER	GLYMA10G00610.1	protein_coding	GLYMA10G00610.1:c.1134+181dupA	-	-	-	-	-	-	1	-	C6T8U3_SOYBN	UPI0001B162FF	-
GLYMA10G00610	10:367783-367783	A	intron_variant	MODIFIER	GLYMA10G00610.3	protein_coding	GLYMA10G00610.3:c.1134+181dupA	-	-	-	-	-	-	1	-	I1L7E8_SOYBN	UPI00023C8730	-
GLYMA10G00610	10:367783-367783	A	intron_variant	MODIFIER	GLYMA10G00610.4	protein_coding	GLYMA10G00610.4:c.1134+181dupA	-	-	-	-	-	-	1	-	C6T8U3_SOYBN	UPI0001B162FF	-
GLYMA10G00610	10:370068-370068	AAGCAAAAATT	downstream_gene_variant	MODIFIER	GLYMA10G00610.1	protein_coding	-	-	-	-	-	-	-	1	-	C6T8U3_SOYBN	UPI0001B162FF	-
GLYMA10G00610	10:370068-370068	AAGCAAAAATT	downstream_gene_variant	MODIFIER	GLYMA10G00610.3	protein_coding	-	-	-	-	-	-	-	1	-	I1L7E8_SOYBN	UPI00023C8730	-
GLYMA10G00610	10:370068-370068	AAGCAAAAATT	downstream_gene_variant	MODIFIER	GLYMA10G00610.4	protein_coding	-	-	-	-	-	-	-	1	-	C6T8U3_SOYBN	UPI0001B162FF	-
GLYMA10G00620	10:370068-370068	AAGCAAAAATT	downstream_gene_variant	MODIFIER	GLYMA10G00620.2	protein_coding	-	-	-	-	-	-	-	-1	-	K7LGQ1_SOYBN	UPI000296F0C7	-
GLYMA10G00620	10:370068-370068	AAGCAAAAATT	downstream_gene_variant	MODIFIER	GLYMA10G00620.3	protein_coding	-	-	-	-	-	-	-	-1	-	K7LGQ2_SOYBN	UPI000294E9A9	-
GLYMA10G00610	10:371314-371314	T	downstream_gene_variant	MODIFIER	GLYMA10G00610.1	protein_coding	-	-	-	-	-	-	-	1	-	C6T8U3_SOYBN	UPI0001B162FF	-
GLYMA10G00610	10:371314-371314	T	downstream_gene_variant	MODIFIER	GLYMA10G00610.3	protein_coding	-	-	-	-	-	-	-	1	-	I1L7E8_SOYBN	UPI00023C8730	-
GLYMA10G00610	10:371314-371314	T	downstream_gene_variant	MODIFIER	GLYMA10G00610.4	protein_coding	-	-	-	-	-	-	-	1	-	C6T8U3_SOYBN	UPI0001B162FF	-
GLYMA10G00620	10:371314-371314	T	downstream_gene_variant	MODIFIER	GLYMA10G00620.2	protein_coding	-	-	-	-	-	-	-	-1	-	K7LGQ1_SOYBN	UPI000296F0C7	-
GLYMA10G00620	10:371314-371314	T	downstream_gene_variant	MODIFIER	GLYMA10G00620.3	protein_coding	-	-	-	-	-	-	-	-1	-	K7LGQ2_SOYBN	UPI000294E9A9	-
GLYMA10G00610	10:371470-371471	-	downstream_gene_variant	MODIFIER	GLYMA10G00610.1	protein_coding	-	-	-	-	-	-	-	1	-	C6T8U3_SOYBN	UPI0001B162FF	-
GLYMA10G00610	10:371470-371471	-	downstream_gene_variant	MODIFIER	GLYMA10G00610.3	protein_coding	-	-	-	-	-	-	-	1	-	I1L7E8_SOYBN	UPI00023C8730	-
GLYMA10G00610	10:371470-371471	-	downstream_gene_variant	MODIFIER	GLYMA10G00610.4	protein_coding	-	-	-	-	-	-	-	1	-	C6T8U3_SOYBN	UPI0001B162FF	-
GLYMA10G00620	10:371470-371471	-	downstream_gene_variant	MODIFIER	GLYMA10G00620.2	protein_coding	-	-	-	-	-	-	-	-1	-	K7LGQ1_SOYBN	UPI000296F0C7	-
GLYMA10G00620	10:371470-371471	-	downstream_gene_variant	MODIFIER	GLYMA10G00620.3	protein_coding	-	-	-	-	-	-	-	-1	-	K7LGQ2_SOYBN	UPI000294E9A9	-
GLYMA10G00610	10:372156-372157	-	downstream_gene_variant	MODIFIER	GLYMA10G00610.1	protein_coding	-	-	-	-	-	-	-	1	-	C6T8U3_SOYBN	UPI0001B162FF	-
GLYMA10G00610	10:372156-372157	-	downstream_gene_variant	MODIFIER	GLYMA10G00610.3	protein_coding	-	-	-	-	-	-	-	1	-	I1L7E8_SOYBN	UPI00023C8730	-
GLYMA10G00610	10:372156-372157	-	downstream_gene_variant	MODIFIER	GLYMA10G00610.4	protein_coding	-	-	-	-	-	-	-	1	-	C6T8U3_SOYBN	UPI0001B162FF	-
GLYMA10G00620	10:372156-372157	-	downstream_gene_variant	MODIFIER	GLYMA10G00620.2	protein_coding	-	-	-	-	-	-	-	-1	-	K7LGQ1_SOYBN	UPI000296F0C7	-
GLYMA10G00620	10:372156-372157	-	downstream_gene_variant	MODIFIER	GLYMA10G00620.3	protein_coding	-	-	-	-	-	-	-	-1	-	K7LGQ2_SOYBN	UPI000294E9A9	-
GLYMA10G00610	10:372182-372186	-	downstream_gene_variant	MODIFIER	GLYMA10G00610.1	protein_coding	-	-	-	-	-	-	-	1	-	C6T8U3_SOYBN	UPI0001B162FF	-
GLYMA10G00610	10:372182-372186	-	downstream_gene_variant	MODIFIER	GLYMA10G00610.3	protein_coding	-	-	-	-	-	-	-	1	-	I1L7E8_SOYBN	UPI00023C8730	-
GLYMA10G00610	10:372182-372186	-	downstream_gene_variant	MODIFIER	GLYMA10G00610.4	protein_coding	-	-	-	-	-	-	-	1	-	C6T8U3_SOYBN	UPI0001B162FF	-
GLYMA10G00620	10:372182-372186	-	downstream_gene_variant	MODIFIER	GLYMA10G00620.2	protein_coding	-	-	-	-	-	-	-	-1	-	K7LGQ1_SOYBN	UPI000296F0C7	-
GLYMA10G00620	10:372182-372186	-	downstream_gene_variant	MODIFIER	GLYMA10G00620.3	protein_coding	-	-	-	-	-	-	-	-1	-	K7LGQ2_SOYBN	UPI000294E9A9	-
GLYMA10G00610	10:372228-372228	AC	downstream_gene_variant	MODIFIER	GLYMA10G00610.1	protein_coding	-	-	-	-	-	-	-	1	-	C6T8U3_SOYBN	UPI0001B162FF	-
GLYMA10G00610	10:372228-372228	AC	downstream_gene_variant	MODIFIER	GLYMA10G00610.3	protein_coding	-	-	-	-	-	-	-	1	-	I1L7E8_SOYBN	UPI00023C8730	-
GLYMA10G00610	10:372228-372228	AC	downstream_gene_variant	MODIFIER	GLYMA10G00610.4	protein_coding	-	-	-	-	-	-	-	1	-	C6T8U3_SOYBN	UPI0001B162FF	-
GLYMA10G00620	10:372228-372228	AC	downstream_gene_variant	MODIFIER	GLYMA10G00620.2	protein_coding	-	-	-	-	-	-	-	-1	-	K7LGQ1_SOYBN	UPI000296F0C7	-
GLYMA10G00620	10:372228-372228	AC	downstream_gene_variant	MODIFIER	GLYMA10G00620.3	protein_coding	-	-	-	-	-	-	-	-1	-	K7LGQ2_SOYBN	UPI000294E9A9	-
GLYMA10G00610	10:372425-372425	T	downstream_gene_variant	MODIFIER	GLYMA10G00610.1	protein_coding	-	-	-	-	-	-	-	1	-	C6T8U3_SOYBN	UPI0001B162FF	-
GLYMA10G00610	10:372425-372425	T	downstream_gene_variant	MODIFIER	GLYMA10G00610.3	protein_coding	-	-	-	-	-	-	-	1	-	I1L7E8_SOYBN	UPI00023C8730	-
GLYMA10G00610	10:372425-372425	T	downstream_gene_variant	MODIFIER	GLYMA10G00610.4	protein_coding	-	-	-	-	-	-	-	1	-	C6T8U3_SOYBN	UPI0001B162FF	-
GLYMA10G00620	10:372425-372425	T	downstream_gene_variant	MODIFIER	GLYMA10G00620.2	protein_coding	-	-	-	-	-	-	-	-1	-	K7LGQ1_SOYBN	UPI000296F0C7	-
GLYMA10G00620	10:372425-372425	T	downstream_gene_variant	MODIFIER	GLYMA10G00620.3	protein_coding	-	-	-	-	-	-	-	-1	-	K7LGQ2_SOYBN	UPI000294E9A9	-
GLYMA10G00610	10:372687-372687	T	downstream_gene_variant	MODIFIER	GLYMA10G00610.1	protein_coding	-	-	-	-	-	-	-	1	-	C6T8U3_SOYBN	UPI0001B162FF	-
GLYMA10G00610	10:372687-372687	T	downstream_gene_variant	MODIFIER	GLYMA10G00610.3	protein_coding	-	-	-	-	-	-	-	1	-	I1L7E8_SOYBN	UPI00023C8730	-
GLYMA10G00610	10:372687-372687	T	downstream_gene_variant	MODIFIER	GLYMA10G00610.4	protein_coding	-	-	-	-	-	-	-	1	-	C6T8U3_SOYBN	UPI0001B162FF	-
GLYMA10G00620	10:372687-372687	T	downstream_gene_variant	MODIFIER	GLYMA10G00620.2	protein_coding	-	-	-	-	-	-	-	-1	-	K7LGQ1_SOYBN	UPI000296F0C7	-
GLYMA10G00620	10:372687-372687	T	downstream_gene_variant	MODIFIER	GLYMA10G00620.3	protein_coding	-	-	-	-	-	-	-	-1	-	K7LGQ2_SOYBN	UPI000294E9A9	-
GLYMA10G00620	10:374894-374894	A	intron_variant	MODIFIER	GLYMA10G00620.2	protein_coding	GLYMA10G00620.2:c.565+473dupT	-	-	-	-	-	-	-1	-	K7LGQ1_SOYBN	UPI000296F0C7	-
GLYMA10G00620	10:374894-374894	A	intron_variant	MODIFIER	GLYMA10G00620.3	protein_coding	GLYMA10G00620.3:c.566-244dupT	-	-	-	-	-	-	-1	-	K7LGQ2_SOYBN	UPI000294E9A9	-
GLYMA10G00620	10:374983-374983	AT	intron_variant	MODIFIER	GLYMA10G00620.2	protein_coding	GLYMA10G00620.2:c.565+383_565+384dupAT	-	-	-	-	-	-	-1	-	K7LGQ1_SOYBN	UPI000296F0C7	-
GLYMA10G00620	10:374983-374983	AT	intron_variant	MODIFIER	GLYMA10G00620.3	protein_coding	GLYMA10G00620.3:c.566-334_566-333dupAT	-	-	-	-	-	-	-1	-	K7LGQ2_SOYBN	UPI000294E9A9	-
GLYMA10G00620	10:376534-376535	-	intron_variant	MODIFIER	GLYMA10G00620.2	protein_coding	GLYMA10G00620.2:c.263-595delA	-	-	-	-	-	-	-1	-	K7LGQ1_SOYBN	UPI000296F0C7	-
GLYMA10G00620	10:376534-376535	-	intron_variant	MODIFIER	GLYMA10G00620.3	protein_coding	GLYMA10G00620.3:c.263-595delA	-	-	-	-	-	-	-1	-	K7LGQ2_SOYBN	UPI000294E9A9	-
GLYMA10G00620	10:377415-377415	AACA	intron_variant	MODIFIER	GLYMA10G00620.2	protein_coding	GLYMA10G00620.2:c.262+89_262+90insTGTT	-	-	-	-	-	-	-1	-	K7LGQ1_SOYBN	UPI000296F0C7	-
GLYMA10G00620	10:377415-377415	AACA	intron_variant	MODIFIER	GLYMA10G00620.3	protein_coding	GLYMA10G00620.3:c.262+89_262+90insTGTT	-	-	-	-	-	-	-1	-	K7LGQ2_SOYBN	UPI000294E9A9	-
GLYMA10G00620	10:382110-382113	-	upstream_gene_variant	MODIFIER	GLYMA10G00620.2	protein_coding	-	-	-	-	-	-	-	-1	-	K7LGQ1_SOYBN	UPI000296F0C7	-
GLYMA10G00620	10:382110-382113	-	upstream_gene_variant	MODIFIER	GLYMA10G00620.3	protein_coding	-	-	-	-	-	-	-	-1	-	K7LGQ2_SOYBN	UPI000294E9A9	-
GLYMA10G00630	10:382110-382113	-	upstream_gene_variant	MODIFIER	GLYMA10G00630.1	protein_coding	-	-	-	-	-	-	-	1	-	I1L7F0_SOYBN	UPI000233C215	-
GLYMA10G00620	10:382136-382139	-	upstream_gene_variant	MODIFIER	GLYMA10G00620.2	protein_coding	-	-	-	-	-	-	-	-1	-	K7LGQ1_SOYBN	UPI000296F0C7	-
GLYMA10G00620	10:382136-382139	-	upstream_gene_variant	MODIFIER	GLYMA10G00620.3	protein_coding	-	-	-	-	-	-	-	-1	-	K7LGQ2_SOYBN	UPI000294E9A9	-
GLYMA10G00630	10:382136-382139	-	upstream_gene_variant	MODIFIER	GLYMA10G00630.1	protein_coding	-	-	-	-	-	-	-	1	-	I1L7F0_SOYBN	UPI000233C215	-
GLYMA10G00630	10:383462-383462	A	upstream_gene_variant	MODIFIER	GLYMA10G00630.1	protein_coding	-	-	-	-	-	-	-	1	-	I1L7F0_SOYBN	UPI000233C215	-
GLYMA10G00630	10:383502-383503	-	upstream_gene_variant	MODIFIER	GLYMA10G00630.1	protein_coding	-	-	-	-	-	-	-	1	-	I1L7F0_SOYBN	UPI000233C215	-
GLYMA10G00630	10:384306-384306	AA	upstream_gene_variant	MODIFIER	GLYMA10G00630.1	protein_coding	-	-	-	-	-	-	-	1	-	I1L7F0_SOYBN	UPI000233C215	-
GLYMA10G00630	10:384387-384388	-	upstream_gene_variant	MODIFIER	GLYMA10G00630.1	protein_coding	-	-	-	-	-	-	-	1	-	I1L7F0_SOYBN	UPI000233C215	-
GLYMA10G00630	10:384478-384478	AATTT	upstream_gene_variant	MODIFIER	GLYMA10G00630.1	protein_coding	-	-	-	-	-	-	-	1	-	I1L7F0_SOYBN	UPI000233C215	-
GLYMA10G00630	10:384741-384742	-	upstream_gene_variant	MODIFIER	GLYMA10G00630.1	protein_coding	-	-	-	-	-	-	-	1	-	I1L7F0_SOYBN	UPI000233C215	-
GLYMA10G00630	10:384844-384844	TCTCTATATATA	upstream_gene_variant	MODIFIER	GLYMA10G00630.1	protein_coding	-	-	-	-	-	-	-	1	-	I1L7F0_SOYBN	UPI000233C215	-
GLYMA10G00630	10:384877-384879	-	upstream_gene_variant	MODIFIER	GLYMA10G00630.1	protein_coding	-	-	-	-	-	-	-	1	-	I1L7F0_SOYBN	UPI000233C215	-
GLYMA10G00630	10:384948-384948	T	upstream_gene_variant	MODIFIER	GLYMA10G00630.1	protein_coding	-	-	-	-	-	-	-	1	-	I1L7F0_SOYBN	UPI000233C215	-
GLYMA10G00630	10:385056-385056	CCCGGG	upstream_gene_variant	MODIFIER	GLYMA10G00630.1	protein_coding	-	-	-	-	-	-	-	1	-	I1L7F0_SOYBN	UPI000233C215	-
GLYMA10G00630	10:386323-386323	AA	upstream_gene_variant	MODIFIER	GLYMA10G00630.1	protein_coding	-	-	-	-	-	-	-	1	-	I1L7F0_SOYBN	UPI000233C215	-
GLYMA10G00630	10:386477-386477	A	upstream_gene_variant	MODIFIER	GLYMA10G00630.1	protein_coding	-	-	-	-	-	-	-	1	-	I1L7F0_SOYBN	UPI000233C215	-
GLYMA10G00630	10:387372-387372	T	intron_variant	MODIFIER	GLYMA10G00630.1	protein_coding	GLYMA10G00630.1:c.379-92_379-91insT	-	-	-	-	-	-	1	-	I1L7F0_SOYBN	UPI000233C215	-
GLYMA10G00640	10:387372-387372	T	downstream_gene_variant	MODIFIER	GLYMA10G00640.1	protein_coding	-	-	-	-	-	-	-	-1	-	-	UPI0001B6418B	-
GLYMA10G00630	10:391508-391508	T	downstream_gene_variant	MODIFIER	GLYMA10G00630.1	protein_coding	-	-	-	-	-	-	-	1	-	I1L7F0_SOYBN	UPI000233C215	-
GLYMA10G00640	10:391508-391508	T	downstream_gene_variant	MODIFIER	GLYMA10G00640.1	protein_coding	-	-	-	-	-	-	-	-1	-	-	UPI0001B6418B	-
GLYMA10G00630	10:391879-391880	-	downstream_gene_variant	MODIFIER	GLYMA10G00630.1	protein_coding	-	-	-	-	-	-	-	1	-	I1L7F0_SOYBN	UPI000233C215	-
GLYMA10G00640	10:391879-391880	-	downstream_gene_variant	MODIFIER	GLYMA10G00640.1	protein_coding	-	-	-	-	-	-	-	-1	-	-	UPI0001B6418B	-
GLYMA10G00630	10:391900-391900	AA	downstream_gene_variant	MODIFIER	GLYMA10G00630.1	protein_coding	-	-	-	-	-	-	-	1	-	I1L7F0_SOYBN	UPI000233C215	-
GLYMA10G00640	10:391900-391900	AA	downstream_gene_variant	MODIFIER	GLYMA10G00640.1	protein_coding	-	-	-	-	-	-	-	-1	-	-	UPI0001B6418B	-
GLYMA10G00630	10:392296-392296	A	downstream_gene_variant	MODIFIER	GLYMA10G00630.1	protein_coding	-	-	-	-	-	-	-	1	-	I1L7F0_SOYBN	UPI000233C215	-
GLYMA10G00640	10:392296-392296	A	3_prime_UTR_variant	MODIFIER	GLYMA10G00640.1	protein_coding	GLYMA10G00640.1:c.*370dupT	-	1522-1523	-	-	-	-	-1	-	-	UPI0001B6418B	-
GLYMA10G00640	10:396854-396854	C	intron_variant	MODIFIER	GLYMA10G00640.1	protein_coding	GLYMA10G00640.1:c.468+1173_468+1174insG	-	-	-	-	-	-	-1	-	-	UPI0001B6418B	-
GLYMA10G00640	10:397505-397505	A	intron_variant	MODIFIER	GLYMA10G00640.1	protein_coding	GLYMA10G00640.1:c.468+522dupT	-	-	-	-	-	-	-1	-	-	UPI0001B6418B	-
GLYMA10G00640	10:400112-400112	TT	upstream_gene_variant	MODIFIER	GLYMA10G00640.1	protein_coding	-	-	-	-	-	-	-	-1	-	-	UPI0001B6418B	-
GLYMA10G00650	10:400112-400112	TT	downstream_gene_variant	MODIFIER	GLYMA10G00650.1	protein_coding	-	-	-	-	-	-	-	-1	-	K7LGQ3_SOYBN	UPI000294FF6F	-
GLYMA10G00640	10:400129-400129	TG	upstream_gene_variant	MODIFIER	GLYMA10G00640.1	protein_coding	-	-	-	-	-	-	-	-1	-	-	UPI0001B6418B	-
GLYMA10G00650	10:400129-400129	TG	downstream_gene_variant	MODIFIER	GLYMA10G00650.1	protein_coding	-	-	-	-	-	-	-	-1	-	K7LGQ3_SOYBN	UPI000294FF6F	-
GLYMA10G00640	10:400907-400907	T	upstream_gene_variant	MODIFIER	GLYMA10G00640.1	protein_coding	-	-	-	-	-	-	-	-1	-	-	UPI0001B6418B	-
GLYMA10G00650	10:400907-400907	T	downstream_gene_variant	MODIFIER	GLYMA10G00650.1	protein_coding	-	-	-	-	-	-	-	-1	-	K7LGQ3_SOYBN	UPI000294FF6F	-
GLYMA10G00640	10:403912-403912	A	upstream_gene_variant	MODIFIER	GLYMA10G00640.1	protein_coding	-	-	-	-	-	-	-	-1	-	-	UPI0001B6418B	-
GLYMA10G00650	10:403912-403912	A	upstream_gene_variant	MODIFIER	GLYMA10G00650.1	protein_coding	-	-	-	-	-	-	-	-1	-	K7LGQ3_SOYBN	UPI000294FF6F	-
GLYMA10G00655	10:403912-403912	A	upstream_gene_variant	MODIFIER	GLYMA10G00655.1	protein_coding	-	-	-	-	-	-	-	1	-	K7LGQ4_SOYBN	UPI00023C8737	-
GLYMA10G00650	10:406257-406257	AA	upstream_gene_variant	MODIFIER	GLYMA10G00650.1	protein_coding	-	-	-	-	-	-	-	-1	-	K7LGQ3_SOYBN	UPI000294FF6F	-
GLYMA10G00655	10:406257-406257	AA	upstream_gene_variant	MODIFIER	GLYMA10G00655.1	protein_coding	-	-	-	-	-	-	-	1	-	K7LGQ4_SOYBN	UPI00023C8737	-
GLYMA10G00650	10:408104-408104	A	upstream_gene_variant	MODIFIER	GLYMA10G00650.1	protein_coding	-	-	-	-	-	-	-	-1	-	K7LGQ3_SOYBN	UPI000294FF6F	-
GLYMA10G00655	10:408104-408104	A	downstream_gene_variant	MODIFIER	GLYMA10G00655.1	protein_coding	-	-	-	-	-	-	-	1	-	K7LGQ4_SOYBN	UPI00023C8737	-
GLYMA10G00660	10:408104-408104	A	upstream_gene_variant	MODIFIER	GLYMA10G00660.1	protein_coding	-	-	-	-	-	-	-	1	-	I1L7F1_SOYBN	UPI000233C216	-
GLYMA10G00655	10:410229-410229	T	downstream_gene_variant	MODIFIER	GLYMA10G00655.1	protein_coding	-	-	-	-	-	-	-	1	-	K7LGQ4_SOYBN	UPI00023C8737	-
GLYMA10G00660	10:410229-410229	T	upstream_gene_variant	MODIFIER	GLYMA10G00660.1	protein_coding	-	-	-	-	-	-	-	1	-	I1L7F1_SOYBN	UPI000233C216	-
GLYMA10G00660	10:427417-427417	T	downstream_gene_variant	MODIFIER	GLYMA10G00660.1	protein_coding	-	-	-	-	-	-	-	1	-	I1L7F1_SOYBN	UPI000233C216	-
GLYMA10G00670	10:427417-427417	T	upstream_gene_variant	MODIFIER	GLYMA10G00670.1	protein_coding	-	-	-	-	-	-	-	-1	-	I1L7F2_SOYBN	UPI000294AFB7	-
GLYMA10G00660	10:427462-427462	T	downstream_gene_variant	MODIFIER	GLYMA10G00660.1	protein_coding	-	-	-	-	-	-	-	1	-	I1L7F1_SOYBN	UPI000233C216	-
GLYMA10G00670	10:427462-427462	T	upstream_gene_variant	MODIFIER	GLYMA10G00670.1	protein_coding	-	-	-	-	-	-	-	-1	-	I1L7F2_SOYBN	UPI000294AFB7	-
GLYMA10G00660	10:427463-427463	TAT	downstream_gene_variant	MODIFIER	GLYMA10G00660.1	protein_coding	-	-	-	-	-	-	-	1	-	I1L7F1_SOYBN	UPI000233C216	-
GLYMA10G00670	10:427463-427463	TAT	upstream_gene_variant	MODIFIER	GLYMA10G00670.1	protein_coding	-	-	-	-	-	-	-	-1	-	I1L7F2_SOYBN	UPI000294AFB7	-
GLYMA10G00670	10:427552-427552	A	upstream_gene_variant	MODIFIER	GLYMA10G00670.1	protein_coding	-	-	-	-	-	-	-	-1	-	I1L7F2_SOYBN	UPI000294AFB7	-
GLYMA10G00670	10:428207-428207	A	upstream_gene_variant	MODIFIER	GLYMA10G00670.1	protein_coding	-	-	-	-	-	-	-	-1	-	I1L7F2_SOYBN	UPI000294AFB7	-
GLYMA10G00670	10:428393-428393	T	upstream_gene_variant	MODIFIER	GLYMA10G00670.1	protein_coding	-	-	-	-	-	-	-	-1	-	I1L7F2_SOYBN	UPI000294AFB7	-
GLYMA10G00680	10:428393-428393	T	downstream_gene_variant	MODIFIER	GLYMA10G00680.1	protein_coding	-	-	-	-	-	-	-	-1	-	I1L7F3_SOYBN	UPI000233C38C	-
GLYMA10G00670	10:428955-428955	T	upstream_gene_variant	MODIFIER	GLYMA10G00670.1	protein_coding	-	-	-	-	-	-	-	-1	-	I1L7F2_SOYBN	UPI000294AFB7	-
GLYMA10G00680	10:428955-428955	T	downstream_gene_variant	MODIFIER	GLYMA10G00680.1	protein_coding	-	-	-	-	-	-	-	-1	-	I1L7F3_SOYBN	UPI000233C38C	-
GLYMA10G00670	10:428963-428963	TTTT	upstream_gene_variant	MODIFIER	GLYMA10G00670.1	protein_coding	-	-	-	-	-	-	-	-1	-	I1L7F2_SOYBN	UPI000294AFB7	-
GLYMA10G00680	10:428963-428963	TTTT	downstream_gene_variant	MODIFIER	GLYMA10G00680.1	protein_coding	-	-	-	-	-	-	-	-1	-	I1L7F3_SOYBN	UPI000233C38C	-
GLYMA10G00670	10:429442-429442	T	upstream_gene_variant	MODIFIER	GLYMA10G00670.1	protein_coding	-	-	-	-	-	-	-	-1	-	I1L7F2_SOYBN	UPI000294AFB7	-
GLYMA10G00680	10:429442-429442	T	downstream_gene_variant	MODIFIER	GLYMA10G00680.1	protein_coding	-	-	-	-	-	-	-	-1	-	I1L7F3_SOYBN	UPI000233C38C	-
GLYMA10G00670	10:429505-429505	CCC	upstream_gene_variant	MODIFIER	GLYMA10G00670.1	protein_coding	-	-	-	-	-	-	-	-1	-	I1L7F2_SOYBN	UPI000294AFB7	-
GLYMA10G00680	10:429505-429505	CCC	downstream_gene_variant	MODIFIER	GLYMA10G00680.1	protein_coding	-	-	-	-	-	-	-	-1	-	I1L7F3_SOYBN	UPI000233C38C	-
GLYMA10G00670	10:429512-429512	G	upstream_gene_variant	MODIFIER	GLYMA10G00670.1	protein_coding	-	-	-	-	-	-	-	-1	-	I1L7F2_SOYBN	UPI000294AFB7	-
GLYMA10G00680	10:429512-429512	G	downstream_gene_variant	MODIFIER	GLYMA10G00680.1	protein_coding	-	-	-	-	-	-	-	-1	-	I1L7F3_SOYBN	UPI000233C38C	-
GLYMA10G00670	10:429516-429516	AAG	upstream_gene_variant	MODIFIER	GLYMA10G00670.1	protein_coding	-	-	-	-	-	-	-	-1	-	I1L7F2_SOYBN	UPI000294AFB7	-
GLYMA10G00680	10:429516-429516	AAG	downstream_gene_variant	MODIFIER	GLYMA10G00680.1	protein_coding	-	-	-	-	-	-	-	-1	-	I1L7F3_SOYBN	UPI000233C38C	-
GLYMA10G00670	10:430115-430115	T	upstream_gene_variant	MODIFIER	GLYMA10G00670.1	protein_coding	-	-	-	-	-	-	-	-1	-	I1L7F2_SOYBN	UPI000294AFB7	-
GLYMA10G00680	10:430115-430115	T	downstream_gene_variant	MODIFIER	GLYMA10G00680.1	protein_coding	-	-	-	-	-	-	-	-1	-	I1L7F3_SOYBN	UPI000233C38C	-
GLYMA10G00670	10:430745-430745	CA	upstream_gene_variant	MODIFIER	GLYMA10G00670.1	protein_coding	-	-	-	-	-	-	-	-1	-	I1L7F2_SOYBN	UPI000294AFB7	-
GLYMA10G00680	10:430745-430745	CA	downstream_gene_variant	MODIFIER	GLYMA10G00680.1	protein_coding	-	-	-	-	-	-	-	-1	-	I1L7F3_SOYBN	UPI000233C38C	-
GLYMA10G00670	10:430748-430748	AG	upstream_gene_variant	MODIFIER	GLYMA10G00670.1	protein_coding	-	-	-	-	-	-	-	-1	-	I1L7F2_SOYBN	UPI000294AFB7	-
GLYMA10G00680	10:430748-430748	AG	downstream_gene_variant	MODIFIER	GLYMA10G00680.1	protein_coding	-	-	-	-	-	-	-	-1	-	I1L7F3_SOYBN	UPI000233C38C	-
GLYMA10G00680	10:432567-432567	GA	downstream_gene_variant	MODIFIER	GLYMA10G00680.1	protein_coding	-	-	-	-	-	-	-	-1	-	I1L7F3_SOYBN	UPI000233C38C	-
GLYMA10G00680	10:434937-434937	T	intron_variant	MODIFIER	GLYMA10G00680.1	protein_coding	GLYMA10G00680.1:c.4-36dupA	-	-	-	-	-	-	-1	-	I1L7F3_SOYBN	UPI000233C38C	-
GLYMA10G00690	10:434937-434937	T	upstream_gene_variant	MODIFIER	GLYMA10G00690.1	protein_coding	-	-	-	-	-	-	-	1	-	I1L7F4_SOYBN	UPI00023C873C	-
GLYMA10G00690	10:434937-434937	T	upstream_gene_variant	MODIFIER	GLYMA10G00690.2	protein_coding	-	-	-	-	-	-	-	1	-	I1L7F5_SOYBN	UPI00023C873D	-
GLYMA10G00680	10:435561-435561	T	upstream_gene_variant	MODIFIER	GLYMA10G00680.1	protein_coding	-	-	-	-	-	-	-	-1	-	I1L7F3_SOYBN	UPI000233C38C	-
GLYMA10G00690	10:435561-435561	T	upstream_gene_variant	MODIFIER	GLYMA10G00690.1	protein_coding	-	-	-	-	-	-	-	1	-	I1L7F4_SOYBN	UPI00023C873C	-
GLYMA10G00690	10:435561-435561	T	upstream_gene_variant	MODIFIER	GLYMA10G00690.2	protein_coding	-	-	-	-	-	-	-	1	-	I1L7F5_SOYBN	UPI00023C873D	-
GLYMA10G00680	10:437761-437761	T	upstream_gene_variant	MODIFIER	GLYMA10G00680.1	protein_coding	-	-	-	-	-	-	-	-1	-	I1L7F3_SOYBN	UPI000233C38C	-
GLYMA10G00690	10:437761-437761	T	upstream_gene_variant	MODIFIER	GLYMA10G00690.1	protein_coding	-	-	-	-	-	-	-	1	-	I1L7F4_SOYBN	UPI00023C873C	-
GLYMA10G00690	10:437761-437761	T	upstream_gene_variant	MODIFIER	GLYMA10G00690.2	protein_coding	-	-	-	-	-	-	-	1	-	I1L7F5_SOYBN	UPI00023C873D	-
GLYMA10G00690	10:447695-447695	AATAAT	downstream_gene_variant	MODIFIER	GLYMA10G00690.1	protein_coding	-	-	-	-	-	-	-	1	-	I1L7F4_SOYBN	UPI00023C873C	-
GLYMA10G00690	10:447695-447695	AATAAT	downstream_gene_variant	MODIFIER	GLYMA10G00690.2	protein_coding	-	-	-	-	-	-	-	1	-	I1L7F5_SOYBN	UPI00023C873D	-
GLYMA10G00701	10:447695-447695	AATAAT	upstream_gene_variant	MODIFIER	GLYMA10G00701.1	protein_coding	-	-	-	-	-	-	-	1	-	K7LGQ5_SOYBN	UPI000233C217	-
GLYMA10G00690	10:447722-447726	-	downstream_gene_variant	MODIFIER	GLYMA10G00690.1	protein_coding	-	-	-	-	-	-	-	1	-	I1L7F4_SOYBN	UPI00023C873C	-
GLYMA10G00690	10:447722-447726	-	downstream_gene_variant	MODIFIER	GLYMA10G00690.2	protein_coding	-	-	-	-	-	-	-	1	-	I1L7F5_SOYBN	UPI00023C873D	-
GLYMA10G00701	10:447722-447726	-	upstream_gene_variant	MODIFIER	GLYMA10G00701.1	protein_coding	-	-	-	-	-	-	-	1	-	K7LGQ5_SOYBN	UPI000233C217	-
GLYMA10G00690	10:449061-449061	T	downstream_gene_variant	MODIFIER	GLYMA10G00690.1	protein_coding	-	-	-	-	-	-	-	1	-	I1L7F4_SOYBN	UPI00023C873C	-
GLYMA10G00701	10:449061-449061	T	upstream_gene_variant	MODIFIER	GLYMA10G00701.1	protein_coding	-	-	-	-	-	-	-	1	-	K7LGQ5_SOYBN	UPI000233C217	-
GLYMA10G00701	10:449267-449270	-	5_prime_UTR_variant	MODIFIER	GLYMA10G00701.1	protein_coding	GLYMA10G00701.1:c.-300_-298delGGA	-	30-32	-	-	-	-	1	-	K7LGQ5_SOYBN	UPI000233C217	-
GLYMA10G00701	10:449271-449274	-	5_prime_UTR_variant	MODIFIER	GLYMA10G00701.1	protein_coding	GLYMA10G00701.1:c.-293_-291delGGG	-	34-36	-	-	-	-	1	-	K7LGQ5_SOYBN	UPI000233C217	-
GLYMA10G00701	10:450877-450879	-	intron_variant	MODIFIER	GLYMA10G00701.1	protein_coding	GLYMA10G00701.1:c.295+242_295+243delAA	-	-	-	-	-	-	1	-	K7LGQ5_SOYBN	UPI000233C217	-
GLYMA10G00701	10:451018-451018	ATT	intron_variant	MODIFIER	GLYMA10G00701.1	protein_coding	GLYMA10G00701.1:c.295+380_295+381insATT	-	-	-	-	-	-	1	-	K7LGQ5_SOYBN	UPI000233C217	-
GLYMA10G00701	10:451247-451247	A	intron_variant	MODIFIER	GLYMA10G00701.1	protein_coding	GLYMA10G00701.1:c.295+617dupA	-	-	-	-	-	-	1	-	K7LGQ5_SOYBN	UPI000233C217	-
GLYMA10G00701	10:455311-455311	T	downstream_gene_variant	MODIFIER	GLYMA10G00701.1	protein_coding	-	-	-	-	-	-	-	1	-	K7LGQ5_SOYBN	UPI000233C217	-
GLYMA10G00710	10:455311-455311	T	upstream_gene_variant	MODIFIER	GLYMA10G00710.2	protein_coding	-	-	-	-	-	-	-	1	-	K7LGQ6_SOYBN	UPI000233C218	-
GLYMA10G00701	10:455352-455354	-	downstream_gene_variant	MODIFIER	GLYMA10G00701.1	protein_coding	-	-	-	-	-	-	-	1	-	K7LGQ5_SOYBN	UPI000233C217	-
GLYMA10G00710	10:455352-455354	-	upstream_gene_variant	MODIFIER	GLYMA10G00710.2	protein_coding	-	-	-	-	-	-	-	1	-	K7LGQ6_SOYBN	UPI000233C218	-
GLYMA10G00701	10:455765-455765	CAA	downstream_gene_variant	MODIFIER	GLYMA10G00701.1	protein_coding	-	-	-	-	-	-	-	1	-	K7LGQ5_SOYBN	UPI000233C217	-
GLYMA10G00710	10:455765-455765	CAA	upstream_gene_variant	MODIFIER	GLYMA10G00710.2	protein_coding	-	-	-	-	-	-	-	1	-	K7LGQ6_SOYBN	UPI000233C218	-
GLYMA10G00701	10:455955-455955	A	downstream_gene_variant	MODIFIER	GLYMA10G00701.1	protein_coding	-	-	-	-	-	-	-	1	-	K7LGQ5_SOYBN	UPI000233C217	-
GLYMA10G00710	10:455955-455955	A	upstream_gene_variant	MODIFIER	GLYMA10G00710.2	protein_coding	-	-	-	-	-	-	-	1	-	K7LGQ6_SOYBN	UPI000233C218	-
GLYMA10G00701	10:455981-455982	-	downstream_gene_variant	MODIFIER	GLYMA10G00701.1	protein_coding	-	-	-	-	-	-	-	1	-	K7LGQ5_SOYBN	UPI000233C217	-
GLYMA10G00710	10:455981-455982	-	upstream_gene_variant	MODIFIER	GLYMA10G00710.2	protein_coding	-	-	-	-	-	-	-	1	-	K7LGQ6_SOYBN	UPI000233C218	-
GLYMA10G00701	10:456096-456096	A	downstream_gene_variant	MODIFIER	GLYMA10G00701.1	protein_coding	-	-	-	-	-	-	-	1	-	K7LGQ5_SOYBN	UPI000233C217	-
GLYMA10G00710	10:456096-456096	A	upstream_gene_variant	MODIFIER	GLYMA10G00710.2	protein_coding	-	-	-	-	-	-	-	1	-	K7LGQ6_SOYBN	UPI000233C218	-
GLYMA10G00701	10:457387-457389	-	downstream_gene_variant	MODIFIER	GLYMA10G00701.1	protein_coding	-	-	-	-	-	-	-	1	-	K7LGQ5_SOYBN	UPI000233C217	-
GLYMA10G00710	10:457387-457389	-	upstream_gene_variant	MODIFIER	GLYMA10G00710.2	protein_coding	-	-	-	-	-	-	-	1	-	K7LGQ6_SOYBN	UPI000233C218	-
GLYMA10G00720	10:457387-457389	-	downstream_gene_variant	MODIFIER	GLYMA10G00720.1	protein_coding	-	-	-	-	-	-	-	-1	-	I1L7F8_SOYBN	UPI000296EC1A	-
GLYMA10G00701	10:457417-457417	AA	downstream_gene_variant	MODIFIER	GLYMA10G00701.1	protein_coding	-	-	-	-	-	-	-	1	-	K7LGQ5_SOYBN	UPI000233C217	-
GLYMA10G00710	10:457417-457417	AA	upstream_gene_variant	MODIFIER	GLYMA10G00710.2	protein_coding	-	-	-	-	-	-	-	1	-	K7LGQ6_SOYBN	UPI000233C218	-
GLYMA10G00720	10:457417-457417	AA	downstream_gene_variant	MODIFIER	GLYMA10G00720.1	protein_coding	-	-	-	-	-	-	-	-1	-	I1L7F8_SOYBN	UPI000296EC1A	-
GLYMA10G00701	10:457557-457557	CT	downstream_gene_variant	MODIFIER	GLYMA10G00701.1	protein_coding	-	-	-	-	-	-	-	1	-	K7LGQ5_SOYBN	UPI000233C217	-
GLYMA10G00710	10:457557-457557	CT	5_prime_UTR_variant	MODIFIER	GLYMA10G00710.2	protein_coding	GLYMA10G00710.2:c.-78_-77dupTC	-	111-112	-	-	-	-	1	-	K7LGQ6_SOYBN	UPI000233C218	-
GLYMA10G00720	10:457557-457557	CT	downstream_gene_variant	MODIFIER	GLYMA10G00720.1	protein_coding	-	-	-	-	-	-	-	-1	-	I1L7F8_SOYBN	UPI000296EC1A	-
GLYMA10G00710	10:462499-462499	TTTTTTT	downstream_gene_variant	MODIFIER	GLYMA10G00710.2	protein_coding	-	-	-	-	-	-	-	1	-	K7LGQ6_SOYBN	UPI000233C218	-
GLYMA10G00720	10:462499-462499	TTTTTTT	3_prime_UTR_variant	MODIFIER	GLYMA10G00720.1	protein_coding	GLYMA10G00720.1:c.*243_*249dupAAAAAAA	-	2721-2722	-	-	-	-	-1	-	I1L7F8_SOYBN	UPI000296EC1A	-
GLYMA10G00710	10:466579-466579	TTTTTC	downstream_gene_variant	MODIFIER	GLYMA10G00710.2	protein_coding	-	-	-	-	-	-	-	1	-	K7LGQ6_SOYBN	UPI000233C218	-
GLYMA10G00720	10:466579-466579	TTTTTC	intron_variant	MODIFIER	GLYMA10G00720.1	protein_coding	GLYMA10G00720.1:c.1115-325_1115-324insGAAAAA	-	-	-	-	-	-	-1	-	I1L7F8_SOYBN	UPI000296EC1A	-
GLYMA10G00720	10:467397-467397	T	intron_variant	MODIFIER	GLYMA10G00720.1	protein_coding	GLYMA10G00720.1:c.913-40_913-39insA	-	-	-	-	-	-	-1	-	I1L7F8_SOYBN	UPI000296EC1A	-
GLYMA10G00720	10:468679-468679	T	intron_variant	MODIFIER	GLYMA10G00720.1	protein_coding	GLYMA10G00720.1:c.864-465dupA	-	-	-	-	-	-	-1	-	I1L7F8_SOYBN	UPI000296EC1A	-
GLYMA10G00720	10:468981-468981	TCTAAATGACAA	intron_variant	MODIFIER	GLYMA10G00720.1	protein_coding	GLYMA10G00720.1:c.863+694_863+695insTTGTCATTTAGA	-	-	-	-	-	-	-1	-	I1L7F8_SOYBN	UPI000296EC1A	-
GLYMA10G00720	10:471716-471716	G	intron_variant	MODIFIER	GLYMA10G00720.1	protein_coding	GLYMA10G00720.1:c.232-320_232-319insC	-	-	-	-	-	-	-1	-	I1L7F8_SOYBN	UPI000296EC1A	-
GLYMA10G00720	10:471803-471803	T	intron_variant	MODIFIER	GLYMA10G00720.1	protein_coding	GLYMA10G00720.1:c.232-407dupA	-	-	-	-	-	-	-1	-	I1L7F8_SOYBN	UPI000296EC1A	-
GLYMA10G00720	10:471844-471847	-	intron_variant	MODIFIER	GLYMA10G00720.1	protein_coding	GLYMA10G00720.1:c.232-450_232-448delTAT	-	-	-	-	-	-	-1	-	I1L7F8_SOYBN	UPI000296EC1A	-
GLYMA10G00720	10:471849-471850	-	intron_variant	MODIFIER	GLYMA10G00720.1	protein_coding	GLYMA10G00720.1:c.232-453delC	-	-	-	-	-	-	-1	-	I1L7F8_SOYBN	UPI000296EC1A	-
GLYMA10G00720	10:471860-471861	-	intron_variant	MODIFIER	GLYMA10G00720.1	protein_coding	GLYMA10G00720.1:c.232-464delT	-	-	-	-	-	-	-1	-	I1L7F8_SOYBN	UPI000296EC1A	-
GLYMA10G00720	10:472438-472438	G	intron_variant	MODIFIER	GLYMA10G00720.1	protein_coding	GLYMA10G00720.1:c.231+927_231+928insC	-	-	-	-	-	-	-1	-	I1L7F8_SOYBN	UPI000296EC1A	-
GLYMA10G00720	10:472482-472482	ATATATATATAT	intron_variant	MODIFIER	GLYMA10G00720.1	protein_coding	GLYMA10G00720.1:c.231+872_231+883dupATATATATATAT	-	-	-	-	-	-	-1	-	I1L7F8_SOYBN	UPI000296EC1A	-
GLYMA10G00720	10:472818-472818	T	intron_variant	MODIFIER	GLYMA10G00720.1	protein_coding	GLYMA10G00720.1:c.231+547dupA	-	-	-	-	-	-	-1	-	I1L7F8_SOYBN	UPI000296EC1A	-
GLYMA10G00720	10:474043-474043	T	upstream_gene_variant	MODIFIER	GLYMA10G00720.1	protein_coding	-	-	-	-	-	-	-	-1	-	I1L7F8_SOYBN	UPI000296EC1A	-
GLYMA10G00720	10:476351-476353	-	upstream_gene_variant	MODIFIER	GLYMA10G00720.1	protein_coding	-	-	-	-	-	-	-	-1	-	I1L7F8_SOYBN	UPI000296EC1A	-
-	10:481146-481146	ATCTAC	intergenic_variant	MODIFIER	-	-	-	-	-	-	-	-	-	-	-	-	-	-
-	10:481737-481737	TTTTTT	intergenic_variant	MODIFIER	-	-	-	-	-	-	-	-	-	-	-	-	-	-
-	10:481833-481833	T	intergenic_variant	MODIFIER	-	-	-	-	-	-	-	-	-	-	-	-	-	-
-	10:481863-481863	AT	intergenic_variant	MODIFIER	-	-	-	-	-	-	-	-	-	-	-	-	-	-
-	10:481930-481931	-	intergenic_variant	MODIFIER	-	-	-	-	-	-	-	-	-	-	-	-	-	-
-	10:481933-481936	-	intergenic_variant	MODIFIER	-	-	-	-	-	-	-	-	-	-	-	-	-	-
-	10:482564-482564	T	intergenic_variant	MODIFIER	-	-	-	-	-	-	-	-	-	-	-	-	-	-
-	10:490790-490791	-	intergenic_variant	MODIFIER	-	-	-	-	-	-	-	-	-	-	-	-	-	-
-	10:492202-492203	-	intergenic_variant	MODIFIER	-	-	-	-	-	-	-	-	-	-	-	-	-	-
-	10:493849-493849	T	intergenic_variant	MODIFIER	-	-	-	-	-	-	-	-	-	-	-	-	-	-
-	10:495329-495329	AAA	intergenic_variant	MODIFIER	-	-	-	-	-	-	-	-	-	-	-	-	-	-
-	10:495535-495538	-	intergenic_variant	MODIFIER	-	-	-	-	-	-	-	-	-	-	-	-	-	-
-	10:496139-496139	TTT	intergenic_variant	MODIFIER	-	-	-	-	-	-	-	-	-	-	-	-	-	-
-	10:497237-497237	ATAT	intergenic_variant	MODIFIER	-	-	-	-	-	-	-	-	-	-	-	-	-	-
-	10:498028-498028	A	intergenic_variant	MODIFIER	-	-	-	-	-	-	-	-	-	-	-	-	-	-
-	10:499215-499215	T	intergenic_variant	MODIFIER	-	-	-	-	-	-	-	-	-	-	-	-	-	-
GLYMA10G00751	10:503014-503014	A	downstream_gene_variant	MODIFIER	GLYMA10G00751.1	protein_coding	-	-	-	-	-	-	-	-1	-	K7LGQ7_SOYBN	UPI00029687DF	-
GLYMA10G00751	10:503919-503919	T	downstream_gene_variant	MODIFIER	GLYMA10G00751.1	protein_coding	-	-	-	-	-	-	-	-1	-	K7LGQ7_SOYBN	UPI00029687DF	-
GLYMA10G00751	10:504040-504040	T	downstream_gene_variant	MODIFIER	GLYMA10G00751.1	protein_coding	-	-	-	-	-	-	-	-1	-	K7LGQ7_SOYBN	UPI00029687DF	-
GLYMA10G00751	10:509140-509140	AAG	intron_variant	MODIFIER	GLYMA10G00751.1	protein_coding	GLYMA10G00751.1:c.1947+417_1947+419dupCTT	-	-	-	-	-	-	-1	-	K7LGQ7_SOYBN	UPI00029687DF	-
GLYMA10G00751	10:514495-514495	A	intron_variant	MODIFIER	GLYMA10G00751.1	protein_coding	GLYMA10G00751.1:c.1746+2883dupT	-	-	-	-	-	-	-1	-	K7LGQ7_SOYBN	UPI00029687DF	-
GLYMA10G00751	10:521472-521472	T	upstream_gene_variant	MODIFIER	GLYMA10G00751.1	protein_coding	-	-	-	-	-	-	-	-1	-	K7LGQ7_SOYBN	UPI00029687DF	-
GLYMA10G00780	10:521472-521472	T	downstream_gene_variant	MODIFIER	GLYMA10G00780.1	protein_coding	-	-	-	-	-	-	-	-1	-	I1L7G0_SOYBN	UPI00023C88CC	-
GLYMA10G00751	10:521767-521767	AT	upstream_gene_variant	MODIFIER	GLYMA10G00751.1	protein_coding	-	-	-	-	-	-	-	-1	-	K7LGQ7_SOYBN	UPI00029687DF	-
GLYMA10G00780	10:521767-521767	AT	downstream_gene_variant	MODIFIER	GLYMA10G00780.1	protein_coding	-	-	-	-	-	-	-	-1	-	I1L7G0_SOYBN	UPI00023C88CC	-
GLYMA10G00751	10:522080-522080	TA	upstream_gene_variant	MODIFIER	GLYMA10G00751.1	protein_coding	-	-	-	-	-	-	-	-1	-	K7LGQ7_SOYBN	UPI00029687DF	-
GLYMA10G00780	10:522080-522080	TA	downstream_gene_variant	MODIFIER	GLYMA10G00780.1	protein_coding	-	-	-	-	-	-	-	-1	-	I1L7G0_SOYBN	UPI00023C88CC	-
GLYMA10G00751	10:524760-524760	CTTG	upstream_gene_variant	MODIFIER	GLYMA10G00751.1	protein_coding	-	-	-	-	-	-	-	-1	-	K7LGQ7_SOYBN	UPI00029687DF	-
GLYMA10G00780	10:524760-524760	CTTG	downstream_gene_variant	MODIFIER	GLYMA10G00780.1	protein_coding	-	-	-	-	-	-	-	-1	-	I1L7G0_SOYBN	UPI00023C88CC	-
GLYMA10G00790	10:524760-524760	CTTG	downstream_gene_variant	MODIFIER	GLYMA10G00790.1	protein_coding	-	-	-	-	-	-	-	-1	-	I1L7G1_SOYBN	UPI00023C88CD	-
GLYMA10G00780	10:526894-526894	A	intron_variant	MODIFIER	GLYMA10G00780.1	protein_coding	GLYMA10G00780.1:c.530-375dupT	-	-	-	-	-	-	-1	-	I1L7G0_SOYBN	UPI00023C88CC	-
GLYMA10G00790	10:526894-526894	A	downstream_gene_variant	MODIFIER	GLYMA10G00790.1	protein_coding	-	-	-	-	-	-	-	-1	-	I1L7G1_SOYBN	UPI00023C88CD	-
GLYMA10G00780	10:527927-527927	C	intron_variant	MODIFIER	GLYMA10G00780.1	protein_coding	GLYMA10G00780.1:c.366-219_366-218insG	-	-	-	-	-	-	-1	-	I1L7G0_SOYBN	UPI00023C88CC	-
GLYMA10G00790	10:527927-527927	C	downstream_gene_variant	MODIFIER	GLYMA10G00790.1	protein_coding	-	-	-	-	-	-	-	-1	-	I1L7G1_SOYBN	UPI00023C88CD	-
GLYMA10G00780	10:528079-528079	A	intron_variant	MODIFIER	GLYMA10G00780.1	protein_coding	GLYMA10G00780.1:c.365+259dupT	-	-	-	-	-	-	-1	-	I1L7G0_SOYBN	UPI00023C88CC	-
GLYMA10G00790	10:528079-528079	A	downstream_gene_variant	MODIFIER	GLYMA10G00790.1	protein_coding	-	-	-	-	-	-	-	-1	-	I1L7G1_SOYBN	UPI00023C88CD	-
GLYMA10G00780	10:528209-528211	-	intron_variant	MODIFIER	GLYMA10G00780.1	protein_coding	GLYMA10G00780.1:c.365+128_365+129delCT	-	-	-	-	-	-	-1	-	I1L7G0_SOYBN	UPI00023C88CC	-
GLYMA10G00790	10:528209-528211	-	downstream_gene_variant	MODIFIER	GLYMA10G00790.1	protein_coding	-	-	-	-	-	-	-	-1	-	I1L7G1_SOYBN	UPI00023C88CD	-
GLYMA10G00780	10:528851-528851	ACACCTAACATAT	5_prime_UTR_variant	MODIFIER	GLYMA10G00780.1	protein_coding	GLYMA10G00780.1:c.-149_-148insATATGTTAGGTGT	-	39-40	-	-	-	-	-1	-	I1L7G0_SOYBN	UPI00023C88CC	-
GLYMA10G00790	10:528851-528851	ACACCTAACATAT	downstream_gene_variant	MODIFIER	GLYMA10G00790.1	protein_coding	-	-	-	-	-	-	-	-1	-	I1L7G1_SOYBN	UPI00023C88CD	-
GLYMA10G00780	10:529498-529498	A	upstream_gene_variant	MODIFIER	GLYMA10G00780.1	protein_coding	-	-	-	-	-	-	-	-1	-	I1L7G0_SOYBN	UPI00023C88CC	-
GLYMA10G00790	10:529498-529498	A	downstream_gene_variant	MODIFIER	GLYMA10G00790.1	protein_coding	-	-	-	-	-	-	-	-1	-	I1L7G1_SOYBN	UPI00023C88CD	-
GLYMA10G00780	10:530488-530488	CATT	upstream_gene_variant	MODIFIER	GLYMA10G00780.1	protein_coding	-	-	-	-	-	-	-	-1	-	I1L7G0_SOYBN	UPI00023C88CC	-
GLYMA10G00790	10:530488-530488	CATT	intron_variant	MODIFIER	GLYMA10G00790.1	protein_coding	GLYMA10G00790.1:c.451-279_451-278insAATG	-	-	-	-	-	-	-1	-	I1L7G1_SOYBN	UPI00023C88CD	-
GLYMA10G00780	10:530749-530749	CAGAATTGTA	upstream_gene_variant	MODIFIER	GLYMA10G00780.1	protein_coding	-	-	-	-	-	-	-	-1	-	I1L7G0_SOYBN	UPI00023C88CC	-
GLYMA10G00790	10:530749-530749	CAGAATTGTA	intron_variant	MODIFIER	GLYMA10G00790.1	protein_coding	GLYMA10G00790.1:c.450+132_450+133insTACAATTCTG	-	-	-	-	-	-	-1	-	I1L7G1_SOYBN	UPI00023C88CD	-
GLYMA10G00780	10:532014-532014	A	upstream_gene_variant	MODIFIER	GLYMA10G00780.1	protein_coding	-	-	-	-	-	-	-	-1	-	I1L7G0_SOYBN	UPI00023C88CC	-
GLYMA10G00790	10:532014-532014	A	intron_variant	MODIFIER	GLYMA10G00790.1	protein_coding	GLYMA10G00790.1:c.341+150dupT	-	-	-	-	-	-	-1	-	I1L7G1_SOYBN	UPI00023C88CD	-
GLYMA10G00790	10:534675-534675	A	upstream_gene_variant	MODIFIER	GLYMA10G00790.1	protein_coding	-	-	-	-	-	-	-	-1	-	I1L7G1_SOYBN	UPI00023C88CD	-
GLYMA10G00790	10:534676-534676	AAAAA	upstream_gene_variant	MODIFIER	GLYMA10G00790.1	protein_coding	-	-	-	-	-	-	-	-1	-	I1L7G1_SOYBN	UPI00023C88CD	-
GLYMA10G00790	10:534919-534919	T	upstream_gene_variant	MODIFIER	GLYMA10G00790.1	protein_coding	-	-	-	-	-	-	-	-1	-	I1L7G1_SOYBN	UPI00023C88CD	-
GLYMA10G00790	10:538140-538140	TGAAAGTACTGATGC	upstream_gene_variant	MODIFIER	GLYMA10G00790.1	protein_coding	-	-	-	-	-	-	-	-1	-	I1L7G1_SOYBN	UPI00023C88CD	-
GLYMA10G00800	10:538140-538140	TGAAAGTACTGATGC	upstream_gene_variant	MODIFIER	GLYMA10G00800.1	protein_coding	-	-	-	-	-	-	-	1	-	I1L7G2_SOYBN	UPI000233C799	-
GLYMA10G00800	10:539760-539760	A	upstream_gene_variant	MODIFIER	GLYMA10G00800.1	protein_coding	-	-	-	-	-	-	-	1	-	I1L7G2_SOYBN	UPI000233C799	-
GLYMA10G00800	10:542981-542981	TAT	intron_variant	MODIFIER	GLYMA10G00800.1	protein_coding	GLYMA10G00800.1:c.116-715_116-714insTAT	-	-	-	-	-	-	1	-	I1L7G2_SOYBN	UPI000233C799	-
GLYMA10G00800	10:550324-550324	TA	downstream_gene_variant	MODIFIER	GLYMA10G00800.1	protein_coding	-	-	-	-	-	-	-	1	-	I1L7G2_SOYBN	UPI000233C799	-
GLYMA10G00810	10:550324-550324	TA	upstream_gene_variant	MODIFIER	GLYMA10G00810.2	protein_coding	-	-	-	-	-	-	-	1	-	K7LGQ8_SOYBN	UPI000233C21C	-
GLYMA10G00800	10:550362-550362	TA	downstream_gene_variant	MODIFIER	GLYMA10G00800.1	protein_coding	-	-	-	-	-	-	-	1	-	I1L7G2_SOYBN	UPI000233C799	-
GLYMA10G00810	10:550362-550362	TA	upstream_gene_variant	MODIFIER	GLYMA10G00810.2	protein_coding	-	-	-	-	-	-	-	1	-	K7LGQ8_SOYBN	UPI000233C21C	-
GLYMA10G00800	10:550494-550494	T	downstream_gene_variant	MODIFIER	GLYMA10G00800.1	protein_coding	-	-	-	-	-	-	-	1	-	I1L7G2_SOYBN	UPI000233C799	-
GLYMA10G00810	10:550494-550494	T	5_prime_UTR_variant	MODIFIER	GLYMA10G00810.2	protein_coding	GLYMA10G00810.2:c.-3dupT	-	22-23	-	-	-	-	1	-	K7LGQ8_SOYBN	UPI000233C21C	-
GLYMA10G00800	10:551121-551121	A	downstream_gene_variant	MODIFIER	GLYMA10G00800.1	protein_coding	-	-	-	-	-	-	-	1	-	I1L7G2_SOYBN	UPI000233C799	-
GLYMA10G00810	10:551121-551121	A	intron_variant	MODIFIER	GLYMA10G00810.2	protein_coding	GLYMA10G00810.2:c.115+511dupA	-	-	-	-	-	-	1	-	K7LGQ8_SOYBN	UPI000233C21C	-
GLYMA10G00800	10:551752-551752	T	downstream_gene_variant	MODIFIER	GLYMA10G00800.1	protein_coding	-	-	-	-	-	-	-	1	-	I1L7G2_SOYBN	UPI000233C799	-
GLYMA10G00810	10:551752-551752	T	intron_variant	MODIFIER	GLYMA10G00810.2	protein_coding	GLYMA10G00810.2:c.115+1137dupT	-	-	-	-	-	-	1	-	K7LGQ8_SOYBN	UPI000233C21C	-
GLYMA10G00810	10:557253-557253	AA	downstream_gene_variant	MODIFIER	GLYMA10G00810.2	protein_coding	-	-	-	-	-	-	-	1	-	K7LGQ8_SOYBN	UPI000233C21C	-
GLYMA10G00820	10:557253-557253	AA	downstream_gene_variant	MODIFIER	GLYMA10G00820.1	protein_coding	-	-	-	-	-	-	-	-1	-	I1L7G4_SOYBN	UPI000233C910	-
GLYMA10G00830	10:583090-583090	GTATAATACTAC	upstream_gene_variant	MODIFIER	GLYMA10G00830.2	protein_coding	-	-	-	-	-	-	-	-1	-	K7LGQ9_SOYBN	UPI000233C905	-
GLYMA10G00830	10:583090-583090	GTATAATACTAC	upstream_gene_variant	MODIFIER	GLYMA10G00830.3	protein_coding	-	-	-	-	-	-	-	-1	-	K7LGQ9_SOYBN	UPI000233C905	-
GLYMA10G00840	10:583090-583090	GTATAATACTAC	upstream_gene_variant	MODIFIER	GLYMA10G00840.2	protein_coding	-	-	-	-	-	-	-	1	-	K7LGR1_SOYBN	UPI000294C5E5	-
GLYMA10G00840	10:586010-586010	A	5_prime_UTR_variant	MODIFIER	GLYMA10G00840.2	protein_coding	GLYMA10G00840.2:c.-108dupA	-	9-Aug	-	-	-	-	1	-	K7LGR1_SOYBN	UPI000294C5E5	-
GLYMA10G00840	10:594142-594142	TT	downstream_gene_variant	MODIFIER	GLYMA10G00840.2	protein_coding	-	-	-	-	-	-	-	1	-	K7LGR1_SOYBN	UPI000294C5E5	-
GLYMA10G00850	10:594142-594142	TT	downstream_gene_variant	MODIFIER	GLYMA10G00850.1	protein_coding	-	-	-	-	-	-	-	-1	-	C6T3B7_SOYBN	UPI0001B153D5	-
GLYMA10G00860	10:594142-594142	TT	upstream_gene_variant	MODIFIER	GLYMA10G00860.1	protein_coding	-	-	-	-	-	-	-	1	-	I1L7G8_SOYBN	UPI000296A045	-
GLYMA10G00840	10:594401-594402	-	downstream_gene_variant	MODIFIER	GLYMA10G00840.2	protein_coding	-	-	-	-	-	-	-	1	-	K7LGR1_SOYBN	UPI000294C5E5	-
GLYMA10G00850	10:594401-594402	-	3_prime_UTR_variant	MODIFIER	GLYMA10G00850.1	protein_coding	GLYMA10G00850.1:c.*244delA	-	835	-	-	-	-	-1	-	C6T3B7_SOYBN	UPI0001B153D5	-
GLYMA10G00860	10:594401-594402	-	upstream_gene_variant	MODIFIER	GLYMA10G00860.1	protein_coding	-	-	-	-	-	-	-	1	-	I1L7G8_SOYBN	UPI000296A045	-
GLYMA10G00840	10:595747-595747	CTT	downstream_gene_variant	MODIFIER	GLYMA10G00840.2	protein_coding	-	-	-	-	-	-	-	1	-	K7LGR1_SOYBN	UPI000294C5E5	-
GLYMA10G00850	10:595747-595747	CTT	intron_variant	MODIFIER	GLYMA10G00850.1	protein_coding	GLYMA10G00850.1:c.99-696_99-694dupAAG	-	-	-	-	-	-	-1	-	C6T3B7_SOYBN	UPI0001B153D5	-
GLYMA10G00860	10:595747-595747	CTT	upstream_gene_variant	MODIFIER	GLYMA10G00860.1	protein_coding	-	-	-	-	-	-	-	1	-	I1L7G8_SOYBN	UPI000296A045	-
GLYMA10G00850	10:598016-598016	ATATGT	5_prime_UTR_variant	MODIFIER	GLYMA10G00850.1	protein_coding	GLYMA10G00850.1:c.-52_-51insACATAT	-	33-34	-	-	-	-	-1	-	C6T3B7_SOYBN	UPI0001B153D5	-
GLYMA10G00860	10:598016-598016	ATATGT	upstream_gene_variant	MODIFIER	GLYMA10G00860.1	protein_coding	-	-	-	-	-	-	-	1	-	I1L7G8_SOYBN	UPI000296A045	-
GLYMA10G00870	10:598016-598016	ATATGT	downstream_gene_variant	MODIFIER	GLYMA10G00870.1	protein_coding	-	-	-	-	-	-	-	-1	-	I1L7G9_SOYBN	UPI000233CF1F	-
GLYMA10G00870	10:598016-598016	ATATGT	downstream_gene_variant	MODIFIER	GLYMA10G00870.2	protein_coding	-	-	-	-	-	-	-	-1	-	C6TLB4_SOYBN	UPI0001B165F8	-
GLYMA10G00850	10:598285-598285	TTT	upstream_gene_variant	MODIFIER	GLYMA10G00850.1	protein_coding	-	-	-	-	-	-	-	-1	-	C6T3B7_SOYBN	UPI0001B153D5	-
GLYMA10G00860	10:598285-598285	TTT	upstream_gene_variant	MODIFIER	GLYMA10G00860.1	protein_coding	-	-	-	-	-	-	-	1	-	I1L7G8_SOYBN	UPI000296A045	-
GLYMA10G00870	10:598285-598285	TTT	downstream_gene_variant	MODIFIER	GLYMA10G00870.1	protein_coding	-	-	-	-	-	-	-	-1	-	I1L7G9_SOYBN	UPI000233CF1F	-
GLYMA10G00870	10:598285-598285	TTT	downstream_gene_variant	MODIFIER	GLYMA10G00870.2	protein_coding	-	-	-	-	-	-	-	-1	-	C6TLB4_SOYBN	UPI0001B165F8	-
GLYMA10G00850	10:598332-598333	-	upstream_gene_variant	MODIFIER	GLYMA10G00850.1	protein_coding	-	-	-	-	-	-	-	-1	-	C6T3B7_SOYBN	UPI0001B153D5	-
GLYMA10G00860	10:598332-598333	-	upstream_gene_variant	MODIFIER	GLYMA10G00860.1	protein_coding	-	-	-	-	-	-	-	1	-	I1L7G8_SOYBN	UPI000296A045	-
GLYMA10G00870	10:598332-598333	-	downstream_gene_variant	MODIFIER	GLYMA10G00870.1	protein_coding	-	-	-	-	-	-	-	-1	-	I1L7G9_SOYBN	UPI000233CF1F	-
GLYMA10G00870	10:598332-598333	-	downstream_gene_variant	MODIFIER	GLYMA10G00870.2	protein_coding	-	-	-	-	-	-	-	-1	-	C6TLB4_SOYBN	UPI0001B165F8	-
GLYMA10G00850	10:598401-598402	-	upstream_gene_variant	MODIFIER	GLYMA10G00850.1	protein_coding	-	-	-	-	-	-	-	-1	-	C6T3B7_SOYBN	UPI0001B153D5	-
GLYMA10G00860	10:598401-598402	-	upstream_gene_variant	MODIFIER	GLYMA10G00860.1	protein_coding	-	-	-	-	-	-	-	1	-	I1L7G8_SOYBN	UPI000296A045	-
GLYMA10G00870	10:598401-598402	-	downstream_gene_variant	MODIFIER	GLYMA10G00870.1	protein_coding	-	-	-	-	-	-	-	-1	-	I1L7G9_SOYBN	UPI000233CF1F	-
GLYMA10G00870	10:598401-598402	-	downstream_gene_variant	MODIFIER	GLYMA10G00870.2	protein_coding	-	-	-	-	-	-	-	-1	-	C6TLB4_SOYBN	UPI0001B165F8	-
GLYMA10G00850	10:598421-598421	ATCATAT	upstream_gene_variant	MODIFIER	GLYMA10G00850.1	protein_coding	-	-	-	-	-	-	-	-1	-	C6T3B7_SOYBN	UPI0001B153D5	-
GLYMA10G00860	10:598421-598421	ATCATAT	upstream_gene_variant	MODIFIER	GLYMA10G00860.1	protein_coding	-	-	-	-	-	-	-	1	-	I1L7G8_SOYBN	UPI000296A045	-
GLYMA10G00870	10:598421-598421	ATCATAT	downstream_gene_variant	MODIFIER	GLYMA10G00870.1	protein_coding	-	-	-	-	-	-	-	-1	-	I1L7G9_SOYBN	UPI000233CF1F	-
GLYMA10G00870	10:598421-598421	ATCATAT	downstream_gene_variant	MODIFIER	GLYMA10G00870.2	protein_coding	-	-	-	-	-	-	-	-1	-	C6TLB4_SOYBN	UPI0001B165F8	-
GLYMA10G00850	10:598742-598742	AAAAGTT	upstream_gene_variant	MODIFIER	GLYMA10G00850.1	protein_coding	-	-	-	-	-	-	-	-1	-	C6T3B7_SOYBN	UPI0001B153D5	-
GLYMA10G00860	10:598742-598742	AAAAGTT	upstream_gene_variant	MODIFIER	GLYMA10G00860.1	protein_coding	-	-	-	-	-	-	-	1	-	I1L7G8_SOYBN	UPI000296A045	-
GLYMA10G00870	10:598742-598742	AAAAGTT	downstream_gene_variant	MODIFIER	GLYMA10G00870.1	protein_coding	-	-	-	-	-	-	-	-1	-	I1L7G9_SOYBN	UPI000233CF1F	-
GLYMA10G00870	10:598742-598742	AAAAGTT	downstream_gene_variant	MODIFIER	GLYMA10G00870.2	protein_coding	-	-	-	-	-	-	-	-1	-	C6TLB4_SOYBN	UPI0001B165F8	-
GLYMA10G00850	10:599045-599045	A	upstream_gene_variant	MODIFIER	GLYMA10G00850.1	protein_coding	-	-	-	-	-	-	-	-1	-	C6T3B7_SOYBN	UPI0001B153D5	-
GLYMA10G00860	10:599045-599045	A	intron_variant	MODIFIER	GLYMA10G00860.1	protein_coding	GLYMA10G00860.1:c.6+29_6+30insA	-	-	-	-	-	-	1	-	I1L7G8_SOYBN	UPI000296A045	-
GLYMA10G00870	10:599045-599045	A	downstream_gene_variant	MODIFIER	GLYMA10G00870.1	protein_coding	-	-	-	-	-	-	-	-1	-	I1L7G9_SOYBN	UPI000233CF1F	-
GLYMA10G00870	10:599045-599045	A	downstream_gene_variant	MODIFIER	GLYMA10G00870.2	protein_coding	-	-	-	-	-	-	-	-1	-	C6TLB4_SOYBN	UPI0001B165F8	-
GLYMA10G00850	10:601972-601972	A	upstream_gene_variant	MODIFIER	GLYMA10G00850.1	protein_coding	-	-	-	-	-	-	-	-1	-	C6T3B7_SOYBN	UPI0001B153D5	-
GLYMA10G00860	10:601972-601972	A	downstream_gene_variant	MODIFIER	GLYMA10G00860.1	protein_coding	-	-	-	-	-	-	-	1	-	I1L7G8_SOYBN	UPI000296A045	-
GLYMA10G00870	10:601972-601972	A	intron_variant	MODIFIER	GLYMA10G00870.1	protein_coding	GLYMA10G00870.1:c.330-174dupT	-	-	-	-	-	-	-1	-	I1L7G9_SOYBN	UPI000233CF1F	-
GLYMA10G00870	10:601972-601972	A	intron_variant	MODIFIER	GLYMA10G00870.2	protein_coding	GLYMA10G00870.2:c.312-174dupT	-	-	-	-	-	-	-1	-	C6TLB4_SOYBN	UPI0001B165F8	-
GLYMA10G00850	10:601978-601978	A	upstream_gene_variant	MODIFIER	GLYMA10G00850.1	protein_coding	-	-	-	-	-	-	-	-1	-	C6T3B7_SOYBN	UPI0001B153D5	-
GLYMA10G00860	10:601978-601978	A	downstream_gene_variant	MODIFIER	GLYMA10G00860.1	protein_coding	-	-	-	-	-	-	-	1	-	I1L7G8_SOYBN	UPI000296A045	-
GLYMA10G00870	10:601978-601978	A	intron_variant	MODIFIER	GLYMA10G00870.1	protein_coding	GLYMA10G00870.1:c.330-180_330-179insT	-	-	-	-	-	-	-1	-	I1L7G9_SOYBN	UPI000233CF1F	-
GLYMA10G00870	10:601978-601978	A	intron_variant	MODIFIER	GLYMA10G00870.2	protein_coding	GLYMA10G00870.2:c.312-180_312-179insT	-	-	-	-	-	-	-1	-	C6TLB4_SOYBN	UPI0001B165F8	-
GLYMA10G00850	10:601989-601991	-	upstream_gene_variant	MODIFIER	GLYMA10G00850.1	protein_coding	-	-	-	-	-	-	-	-1	-	C6T3B7_SOYBN	UPI0001B153D5	-
GLYMA10G00860	10:601989-601991	-	downstream_gene_variant	MODIFIER	GLYMA10G00860.1	protein_coding	-	-	-	-	-	-	-	1	-	I1L7G8_SOYBN	UPI000296A045	-
GLYMA10G00870	10:601989-601991	-	intron_variant	MODIFIER	GLYMA10G00870.1	protein_coding	GLYMA10G00870.1:c.330-192_330-191delTT	-	-	-	-	-	-	-1	-	I1L7G9_SOYBN	UPI000233CF1F	-
GLYMA10G00870	10:601989-601991	-	intron_variant	MODIFIER	GLYMA10G00870.2	protein_coding	GLYMA10G00870.2:c.312-192_312-191delTT	-	-	-	-	-	-	-1	-	C6TLB4_SOYBN	UPI0001B165F8	-
GLYMA10G00870	10:604976-604976	T	intron_variant	MODIFIER	GLYMA10G00870.1	protein_coding	GLYMA10G00870.1:c.80+70dupA	-	-	-	-	-	-	-1	-	I1L7G9_SOYBN	UPI000233CF1F	-
GLYMA10G00870	10:604976-604976	T	intron_variant	MODIFIER	GLYMA10G00870.2	protein_coding	GLYMA10G00870.2:c.80+70dupA	-	-	-	-	-	-	-1	-	C6TLB4_SOYBN	UPI0001B165F8	-
GLYMA10G00870	10:605016-605018	-	intron_variant	MODIFIER	GLYMA10G00870.1	protein_coding	GLYMA10G00870.1:c.80+29_80+30delTT	-	-	-	-	-	-	-1	-	I1L7G9_SOYBN	UPI000233CF1F	-
GLYMA10G00870	10:605016-605018	-	intron_variant	MODIFIER	GLYMA10G00870.2	protein_coding	GLYMA10G00870.2:c.80+29_80+30delTT	-	-	-	-	-	-	-1	-	C6TLB4_SOYBN	UPI0001B165F8	-
GLYMA10G00870	10:605519-605520	-	upstream_gene_variant	MODIFIER	GLYMA10G00870.1	protein_coding	-	-	-	-	-	-	-	-1	-	I1L7G9_SOYBN	UPI000233CF1F	-
GLYMA10G00870	10:605519-605520	-	upstream_gene_variant	MODIFIER	GLYMA10G00870.2	protein_coding	-	-	-	-	-	-	-	-1	-	C6TLB4_SOYBN	UPI0001B165F8	-
GLYMA10G00870	10:606557-606557	A	upstream_gene_variant	MODIFIER	GLYMA10G00870.1	protein_coding	-	-	-	-	-	-	-	-1	-	I1L7G9_SOYBN	UPI000233CF1F	-
GLYMA10G00870	10:606557-606557	A	upstream_gene_variant	MODIFIER	GLYMA10G00870.2	protein_coding	-	-	-	-	-	-	-	-1	-	C6TLB4_SOYBN	UPI0001B165F8	-
GLYMA10G00880	10:606557-606557	A	upstream_gene_variant	MODIFIER	GLYMA10G00880.2	protein_coding	-	-	-	-	-	-	-	1	-	I1L7H1_SOYBN	UPI000233D20A	-
GLYMA10G00870	10:607978-607979	-	upstream_gene_variant	MODIFIER	GLYMA10G00870.1	protein_coding	-	-	-	-	-	-	-	-1	-	I1L7G9_SOYBN	UPI000233CF1F	-
GLYMA10G00870	10:607978-607979	-	upstream_gene_variant	MODIFIER	GLYMA10G00870.2	protein_coding	-	-	-	-	-	-	-	-1	-	C6TLB4_SOYBN	UPI0001B165F8	-
GLYMA10G00880	10:607978-607979	-	upstream_gene_variant	MODIFIER	GLYMA10G00880.2	protein_coding	-	-	-	-	-	-	-	1	-	I1L7H1_SOYBN	UPI000233D20A	-
GLYMA10G00870	10:608997-608997	AA	upstream_gene_variant	MODIFIER	GLYMA10G00870.1	protein_coding	-	-	-	-	-	-	-	-1	-	I1L7G9_SOYBN	UPI000233CF1F	-
GLYMA10G00870	10:608997-608997	AA	upstream_gene_variant	MODIFIER	GLYMA10G00870.2	protein_coding	-	-	-	-	-	-	-	-1	-	C6TLB4_SOYBN	UPI0001B165F8	-
GLYMA10G00880	10:608997-608997	AA	upstream_gene_variant	MODIFIER	GLYMA10G00880.2	protein_coding	-	-	-	-	-	-	-	1	-	I1L7H1_SOYBN	UPI000233D20A	-
GLYMA10G00870	10:609066-609067	-	upstream_gene_variant	MODIFIER	GLYMA10G00870.1	protein_coding	-	-	-	-	-	-	-	-1	-	I1L7G9_SOYBN	UPI000233CF1F	-
GLYMA10G00870	10:609066-609067	-	upstream_gene_variant	MODIFIER	GLYMA10G00870.2	protein_coding	-	-	-	-	-	-	-	-1	-	C6TLB4_SOYBN	UPI0001B165F8	-
GLYMA10G00880	10:609066-609067	-	upstream_gene_variant	MODIFIER	GLYMA10G00880.2	protein_coding	-	-	-	-	-	-	-	1	-	I1L7H1_SOYBN	UPI000233D20A	-
GLYMA10G00870	10:609615-609615	A	upstream_gene_variant	MODIFIER	GLYMA10G00870.1	protein_coding	-	-	-	-	-	-	-	-1	-	I1L7G9_SOYBN	UPI000233CF1F	-
GLYMA10G00870	10:609615-609615	A	upstream_gene_variant	MODIFIER	GLYMA10G00870.2	protein_coding	-	-	-	-	-	-	-	-1	-	C6TLB4_SOYBN	UPI0001B165F8	-
GLYMA10G00880	10:609615-609615	A	upstream_gene_variant	MODIFIER	GLYMA10G00880.2	protein_coding	-	-	-	-	-	-	-	1	-	I1L7H1_SOYBN	UPI000233D20A	-
GLYMA10G00880	10:610708-610708	AG	upstream_gene_variant	MODIFIER	GLYMA10G00880.2	protein_coding	-	-	-	-	-	-	-	1	-	I1L7H1_SOYBN	UPI000233D20A	-
GLYMA10G00880	10:614396-614398	-	intron_variant	MODIFIER	GLYMA10G00880.2	protein_coding	GLYMA10G00880.2:c.1222+164_1222+165delGG	-	-	-	-	-	-	1	-	I1L7H1_SOYBN	UPI000233D20A	-
GLYMA10G00890	10:614396-614398	-	downstream_gene_variant	MODIFIER	GLYMA10G00890.1	protein_coding	-	-	-	-	-	-	-	-1	-	C6TBY0_SOYBN	UPI0001B15DEF	-
GLYMA10G00880	10:614399-614400	-	intron_variant	MODIFIER	GLYMA10G00880.2	protein_coding	GLYMA10G00880.2:c.1222+167delG	-	-	-	-	-	-	1	-	I1L7H1_SOYBN	UPI000233D20A	-
GLYMA10G00890	10:614399-614400	-	downstream_gene_variant	MODIFIER	GLYMA10G00890.1	protein_coding	-	-	-	-	-	-	-	-1	-	C6TBY0_SOYBN	UPI0001B15DEF	-
GLYMA10G00880	10:614402-614403	-	intron_variant	MODIFIER	GLYMA10G00880.2	protein_coding	GLYMA10G00880.2:c.1222+170delA	-	-	-	-	-	-	1	-	I1L7H1_SOYBN	UPI000233D20A	-
GLYMA10G00890	10:614402-614403	-	downstream_gene_variant	MODIFIER	GLYMA10G00890.1	protein_coding	-	-	-	-	-	-	-	-1	-	C6TBY0_SOYBN	UPI0001B15DEF	-
GLYMA10G00880	10:614404-614409	-	intron_variant	MODIFIER	GLYMA10G00880.2	protein_coding	GLYMA10G00880.2:c.1222+172_1222+176delGAGCA	-	-	-	-	-	-	1	-	I1L7H1_SOYBN	UPI000233D20A	-
GLYMA10G00890	10:614404-614409	-	downstream_gene_variant	MODIFIER	GLYMA10G00890.1	protein_coding	-	-	-	-	-	-	-	-1	-	C6TBY0_SOYBN	UPI0001B15DEF	-
GLYMA10G00880	10:618311-618311	T	downstream_gene_variant	MODIFIER	GLYMA10G00880.2	protein_coding	-	-	-	-	-	-	-	1	-	I1L7H1_SOYBN	UPI000233D20A	-
GLYMA10G00890	10:618311-618311	T	downstream_gene_variant	MODIFIER	GLYMA10G00890.1	protein_coding	-	-	-	-	-	-	-	-1	-	C6TBY0_SOYBN	UPI0001B15DEF	-
GLYMA10G00900	10:618311-618311	T	upstream_gene_variant	MODIFIER	GLYMA10G00900.1	protein_coding	-	-	-	-	-	-	-	1	-	I1L7H4_SOYBN	UPI000233C36B	-
GLYMA10G00880	10:620471-620471	AT	downstream_gene_variant	MODIFIER	GLYMA10G00880.2	protein_coding	-	-	-	-	-	-	-	1	-	I1L7H1_SOYBN	UPI000233D20A	-
GLYMA10G00890	10:620471-620471	AT	intron_variant	MODIFIER	GLYMA10G00890.1	protein_coding	GLYMA10G00890.1:c.429+249_429+250dupAT	-	-	-	-	-	-	-1	-	C6TBY0_SOYBN	UPI0001B15DEF	-
GLYMA10G00900	10:620471-620471	AT	upstream_gene_variant	MODIFIER	GLYMA10G00900.1	protein_coding	-	-	-	-	-	-	-	1	-	I1L7H4_SOYBN	UPI000233C36B	-
GLYMA10G00900	10:635465-635465	TTT	downstream_gene_variant	MODIFIER	GLYMA10G00900.1	protein_coding	-	-	-	-	-	-	-	1	-	I1L7H4_SOYBN	UPI000233C36B	-
GLYMA10G00910	10:635465-635465	TTT	downstream_gene_variant	MODIFIER	GLYMA10G00910.2	protein_coding	-	-	-	-	-	-	-	1	-	K7LGR2_SOYBN	UPI000233C36C	-
GLYMA10G00920	10:635465-635465	TTT	upstream_gene_variant	MODIFIER	GLYMA10G00920.1	protein_coding	-	-	-	-	-	-	-	1	-	H2D5S3_SOYBN	UPI000189DA3B	-
GLYMA10G00920	10:635465-635465	TTT	upstream_gene_variant	MODIFIER	GLYMA10G00920.2	protein_coding	-	-	-	-	-	-	-	1	-	I1L7H7_SOYBN	UPI00023C8A49	-
GLYMA10G00900	10:635848-635848	GTGAAAGAG	downstream_gene_variant	MODIFIER	GLYMA10G00900.1	protein_coding	-	-	-	-	-	-	-	1	-	I1L7H4_SOYBN	UPI000233C36B	-
GLYMA10G00910	10:635848-635848	GTGAAAGAG	downstream_gene_variant	MODIFIER	GLYMA10G00910.2	protein_coding	-	-	-	-	-	-	-	1	-	K7LGR2_SOYBN	UPI000233C36C	-
GLYMA10G00920	10:635848-635848	GTGAAAGAG	upstream_gene_variant	MODIFIER	GLYMA10G00920.1	protein_coding	-	-	-	-	-	-	-	1	-	H2D5S3_SOYBN	UPI000189DA3B	-
GLYMA10G00920	10:635848-635848	GTGAAAGAG	upstream_gene_variant	MODIFIER	GLYMA10G00920.2	protein_coding	-	-	-	-	-	-	-	1	-	I1L7H7_SOYBN	UPI00023C8A49	-
GLYMA10G00900	10:635850-635850	A	downstream_gene_variant	MODIFIER	GLYMA10G00900.1	protein_coding	-	-	-	-	-	-	-	1	-	I1L7H4_SOYBN	UPI000233C36B	-
GLYMA10G00910	10:635850-635850	A	downstream_gene_variant	MODIFIER	GLYMA10G00910.2	protein_coding	-	-	-	-	-	-	-	1	-	K7LGR2_SOYBN	UPI000233C36C	-
GLYMA10G00920	10:635850-635850	A	upstream_gene_variant	MODIFIER	GLYMA10G00920.1	protein_coding	-	-	-	-	-	-	-	1	-	H2D5S3_SOYBN	UPI000189DA3B	-
GLYMA10G00920	10:635850-635850	A	upstream_gene_variant	MODIFIER	GLYMA10G00920.2	protein_coding	-	-	-	-	-	-	-	1	-	I1L7H7_SOYBN	UPI00023C8A49	-
GLYMA10G00900	10:635852-635852	A	downstream_gene_variant	MODIFIER	GLYMA10G00900.1	protein_coding	-	-	-	-	-	-	-	1	-	I1L7H4_SOYBN	UPI000233C36B	-
GLYMA10G00910	10:635852-635852	A	downstream_gene_variant	MODIFIER	GLYMA10G00910.2	protein_coding	-	-	-	-	-	-	-	1	-	K7LGR2_SOYBN	UPI000233C36C	-
GLYMA10G00920	10:635852-635852	A	upstream_gene_variant	MODIFIER	GLYMA10G00920.1	protein_coding	-	-	-	-	-	-	-	1	-	H2D5S3_SOYBN	UPI000189DA3B	-
GLYMA10G00920	10:635852-635852	A	upstream_gene_variant	MODIFIER	GLYMA10G00920.2	protein_coding	-	-	-	-	-	-	-	1	-	I1L7H7_SOYBN	UPI00023C8A49	-
GLYMA10G00900	10:635904-635905	-	downstream_gene_variant	MODIFIER	GLYMA10G00900.1	protein_coding	-	-	-	-	-	-	-	1	-	I1L7H4_SOYBN	UPI000233C36B	-
GLYMA10G00910	10:635904-635905	-	downstream_gene_variant	MODIFIER	GLYMA10G00910.2	protein_coding	-	-	-	-	-	-	-	1	-	K7LGR2_SOYBN	UPI000233C36C	-
GLYMA10G00920	10:635904-635905	-	upstream_gene_variant	MODIFIER	GLYMA10G00920.1	protein_coding	-	-	-	-	-	-	-	1	-	H2D5S3_SOYBN	UPI000189DA3B	-
GLYMA10G00920	10:635904-635905	-	upstream_gene_variant	MODIFIER	GLYMA10G00920.2	protein_coding	-	-	-	-	-	-	-	1	-	I1L7H7_SOYBN	UPI00023C8A49	-
GLYMA10G00910	10:636460-636460	AA	downstream_gene_variant	MODIFIER	GLYMA10G00910.2	protein_coding	-	-	-	-	-	-	-	1	-	K7LGR2_SOYBN	UPI000233C36C	-
GLYMA10G00920	10:636460-636460	AA	upstream_gene_variant	MODIFIER	GLYMA10G00920.1	protein_coding	-	-	-	-	-	-	-	1	-	H2D5S3_SOYBN	UPI000189DA3B	-
GLYMA10G00920	10:636460-636460	AA	upstream_gene_variant	MODIFIER	GLYMA10G00920.2	protein_coding	-	-	-	-	-	-	-	1	-	I1L7H7_SOYBN	UPI00023C8A49	-
GLYMA10G00910	10:636799-636799	GTTTAGGAA	downstream_gene_variant	MODIFIER	GLYMA10G00910.2	protein_coding	-	-	-	-	-	-	-	1	-	K7LGR2_SOYBN	UPI000233C36C	-
GLYMA10G00920	10:636799-636799	GTTTAGGAA	upstream_gene_variant	MODIFIER	GLYMA10G00920.1	protein_coding	-	-	-	-	-	-	-	1	-	H2D5S3_SOYBN	UPI000189DA3B	-
GLYMA10G00920	10:636799-636799	GTTTAGGAA	upstream_gene_variant	MODIFIER	GLYMA10G00920.2	protein_coding	-	-	-	-	-	-	-	1	-	I1L7H7_SOYBN	UPI00023C8A49	-
GLYMA10G00910	10:638114-638114	AT	downstream_gene_variant	MODIFIER	GLYMA10G00910.2	protein_coding	-	-	-	-	-	-	-	1	-	K7LGR2_SOYBN	UPI000233C36C	-
GLYMA10G00920	10:638114-638114	AT	upstream_gene_variant	MODIFIER	GLYMA10G00920.1	protein_coding	-	-	-	-	-	-	-	1	-	H2D5S3_SOYBN	UPI000189DA3B	-
GLYMA10G00920	10:638114-638114	AT	upstream_gene_variant	MODIFIER	GLYMA10G00920.2	protein_coding	-	-	-	-	-	-	-	1	-	I1L7H7_SOYBN	UPI00023C8A49	-
GLYMA10G00920	10:640934-640934	ATC	intron_variant	MODIFIER	GLYMA10G00920.1	protein_coding	GLYMA10G00920.1:c.645-41_645-39dupATC	-	-	-	-	-	-	1	-	H2D5S3_SOYBN	UPI000189DA3B	-
GLYMA10G00920	10:640934-640934	ATC	intron_variant	MODIFIER	GLYMA10G00920.2	protein_coding	GLYMA10G00920.2:c.387-41_387-39dupATC	-	-	-	-	-	-	1	-	I1L7H7_SOYBN	UPI00023C8A49	-
GLYMA10G00920	10:641450-641450	AG	intron_variant	MODIFIER	GLYMA10G00920.1	protein_coding	GLYMA10G00920.1:c.892+124_892+125insAG	-	-	-	-	-	-	1	-	H2D5S3_SOYBN	UPI000189DA3B	-
GLYMA10G00920	10:641450-641450	AG	intron_variant	MODIFIER	GLYMA10G00920.2	protein_coding	GLYMA10G00920.2:c.634+124_634+125insAG	-	-	-	-	-	-	1	-	I1L7H7_SOYBN	UPI00023C8A49	-
GLYMA10G00920	10:642827-642827	AC	downstream_gene_variant	MODIFIER	GLYMA10G00920.1	protein_coding	-	-	-	-	-	-	-	1	-	H2D5S3_SOYBN	UPI000189DA3B	-
GLYMA10G00920	10:642827-642827	AC	downstream_gene_variant	MODIFIER	GLYMA10G00920.2	protein_coding	-	-	-	-	-	-	-	1	-	I1L7H7_SOYBN	UPI00023C8A49	-
GLYMA10G00920	10:642903-642915	-	downstream_gene_variant	MODIFIER	GLYMA10G00920.1	protein_coding	-	-	-	-	-	-	-	1	-	H2D5S3_SOYBN	UPI000189DA3B	-
GLYMA10G00920	10:642903-642915	-	downstream_gene_variant	MODIFIER	GLYMA10G00920.2	protein_coding	-	-	-	-	-	-	-	1	-	I1L7H7_SOYBN	UPI00023C8A49	-
GLYMA10G00920	10:643131-643131	AG	downstream_gene_variant	MODIFIER	GLYMA10G00920.1	protein_coding	-	-	-	-	-	-	-	1	-	H2D5S3_SOYBN	UPI000189DA3B	-
GLYMA10G00920	10:643131-643131	AG	downstream_gene_variant	MODIFIER	GLYMA10G00920.2	protein_coding	-	-	-	-	-	-	-	1	-	I1L7H7_SOYBN	UPI00023C8A49	-
GLYMA10G00930	10:643131-643131	AG	downstream_gene_variant	MODIFIER	GLYMA10G00930.1	protein_coding	-	-	-	-	-	-	-	-1	-	Q9S7E3_SOYBN	UPI00000A32A3	-
GLYMA10G00920	10:643277-643278	-	downstream_gene_variant	MODIFIER	GLYMA10G00920.1	protein_coding	-	-	-	-	-	-	-	1	-	H2D5S3_SOYBN	UPI000189DA3B	-
GLYMA10G00920	10:643277-643278	-	downstream_gene_variant	MODIFIER	GLYMA10G00920.2	protein_coding	-	-	-	-	-	-	-	1	-	I1L7H7_SOYBN	UPI00023C8A49	-
GLYMA10G00930	10:643277-643278	-	downstream_gene_variant	MODIFIER	GLYMA10G00930.1	protein_coding	-	-	-	-	-	-	-	-1	-	Q9S7E3_SOYBN	UPI00000A32A3	-
GLYMA10G00920	10:643601-643602	-	downstream_gene_variant	MODIFIER	GLYMA10G00920.1	protein_coding	-	-	-	-	-	-	-	1	-	H2D5S3_SOYBN	UPI000189DA3B	-
GLYMA10G00920	10:643601-643602	-	downstream_gene_variant	MODIFIER	GLYMA10G00920.2	protein_coding	-	-	-	-	-	-	-	1	-	I1L7H7_SOYBN	UPI00023C8A49	-
GLYMA10G00930	10:643601-643602	-	downstream_gene_variant	MODIFIER	GLYMA10G00930.1	protein_coding	-	-	-	-	-	-	-	-1	-	Q9S7E3_SOYBN	UPI00000A32A3	-
GLYMA10G00920	10:643981-643981	TTTTTGA	downstream_gene_variant	MODIFIER	GLYMA10G00920.1	protein_coding	-	-	-	-	-	-	-	1	-	H2D5S3_SOYBN	UPI000189DA3B	-
GLYMA10G00920	10:643981-643981	TTTTTGA	downstream_gene_variant	MODIFIER	GLYMA10G00920.2	protein_coding	-	-	-	-	-	-	-	1	-	I1L7H7_SOYBN	UPI00023C8A49	-
GLYMA10G00930	10:643981-643981	TTTTTGA	downstream_gene_variant	MODIFIER	GLYMA10G00930.1	protein_coding	-	-	-	-	-	-	-	-1	-	Q9S7E3_SOYBN	UPI00000A32A3	-
GLYMA10G00920	10:644595-644595	AT	downstream_gene_variant	MODIFIER	GLYMA10G00920.1	protein_coding	-	-	-	-	-	-	-	1	-	H2D5S3_SOYBN	UPI000189DA3B	-
GLYMA10G00920	10:644595-644595	AT	downstream_gene_variant	MODIFIER	GLYMA10G00920.2	protein_coding	-	-	-	-	-	-	-	1	-	I1L7H7_SOYBN	UPI00023C8A49	-
GLYMA10G00930	10:644595-644595	AT	downstream_gene_variant	MODIFIER	GLYMA10G00930.1	protein_coding	-	-	-	-	-	-	-	-1	-	Q9S7E3_SOYBN	UPI00000A32A3	-
GLYMA10G00930	10:653346-653346	T	upstream_gene_variant	MODIFIER	GLYMA10G00930.1	protein_coding	-	-	-	-	-	-	-	-1	-	Q9S7E3_SOYBN	UPI00000A32A3	-
GLYMA10G00930	10:653478-653478	A	upstream_gene_variant	MODIFIER	GLYMA10G00930.1	protein_coding	-	-	-	-	-	-	-	-1	-	Q9S7E3_SOYBN	UPI00000A32A3	-
GLYMA10G00930	10:655219-655219	A	upstream_gene_variant	MODIFIER	GLYMA10G00930.1	protein_coding	-	-	-	-	-	-	-	-1	-	Q9S7E3_SOYBN	UPI00000A32A3	-
-	10:657721-657723	-	intergenic_variant	MODIFIER	-	-	-	-	-	-	-	-	-	-	-	-	-	-
-	10:657731-657732	-	intergenic_variant	MODIFIER	-	-	-	-	-	-	-	-	-	-	-	-	-	-
-	10:658015-658017	-	intergenic_variant	MODIFIER	-	-	-	-	-	-	-	-	-	-	-	-	-	-
-	10:659479-659479	T	intergenic_variant	MODIFIER	-	-	-	-	-	-	-	-	-	-	-	-	-	-
-	10:661079-661079	A	intergenic_variant	MODIFIER	-	-	-	-	-	-	-	-	-	-	-	-	-	-
GLYMA10G00950	10:665736-665736	TTC	downstream_gene_variant	MODIFIER	GLYMA10G00950.1	protein_coding	-	-	-	-	-	-	-	-1	-	I1L7H9_SOYBN	UPI000233D0BC	-
GLYMA10G00950	10:665784-665786	-	downstream_gene_variant	MODIFIER	GLYMA10G00950.1	protein_coding	-	-	-	-	-	-	-	-1	-	I1L7H9_SOYBN	UPI000233D0BC	-
GLYMA10G00950	10:665787-665788	-	downstream_gene_variant	MODIFIER	GLYMA10G00950.1	protein_coding	-	-	-	-	-	-	-	-1	-	I1L7H9_SOYBN	UPI000233D0BC	-
GLYMA10G00950	10:665990-666016	-	downstream_gene_variant	MODIFIER	GLYMA10G00950.1	protein_coding	-	-	-	-	-	-	-	-1	-	I1L7H9_SOYBN	UPI000233D0BC	-
GLYMA10G00950	10:666020-666020	G	downstream_gene_variant	MODIFIER	GLYMA10G00950.1	protein_coding	-	-	-	-	-	-	-	-1	-	I1L7H9_SOYBN	UPI000233D0BC	-
GLYMA10G00950	10:666938-666938	CTTGC	downstream_gene_variant	MODIFIER	GLYMA10G00950.1	protein_coding	-	-	-	-	-	-	-	-1	-	I1L7H9_SOYBN	UPI000233D0BC	-
GLYMA10G00950	10:667468-667484	-	downstream_gene_variant	MODIFIER	GLYMA10G00950.1	protein_coding	-	-	-	-	-	-	-	-1	-	I1L7H9_SOYBN	UPI000233D0BC	-
GLYMA10G00950	10:667692-667692	AT	downstream_gene_variant	MODIFIER	GLYMA10G00950.1	protein_coding	-	-	-	-	-	-	-	-1	-	I1L7H9_SOYBN	UPI000233D0BC	-
GLYMA10G00950	10:667800-667800	TT	3_prime_UTR_variant	MODIFIER	GLYMA10G00950.1	protein_coding	GLYMA10G00950.1:c.*241_*242insAA	-	1891-1892	-	-	-	-	-1	-	I1L7H9_SOYBN	UPI000233D0BC	-
GLYMA10G00950	10:670088-670088	GAAAT	intron_variant	MODIFIER	GLYMA10G00950.1	protein_coding	GLYMA10G00950.1:c.-14-160_-14-156dupATTTC	-	-	-	-	-	-	-1	-	I1L7H9_SOYBN	UPI000233D0BC	-
GLYMA10G00950	10:672347-672347	C	upstream_gene_variant	MODIFIER	GLYMA10G00950.1	protein_coding	-	-	-	-	-	-	-	-1	-	I1L7H9_SOYBN	UPI000233D0BC	-
GLYMA10G00960	10:672347-672347	C	downstream_gene_variant	MODIFIER	GLYMA10G00960.1	protein_coding	-	-	-	-	-	-	-	-1	-	I1L7I0_SOYBN	UPI000233C36D	-
GLYMA10G00950	10:673037-673037	T	upstream_gene_variant	MODIFIER	GLYMA10G00950.1	protein_coding	-	-	-	-	-	-	-	-1	-	I1L7H9_SOYBN	UPI000233D0BC	-
GLYMA10G00960	10:673037-673037	T	downstream_gene_variant	MODIFIER	GLYMA10G00960.1	protein_coding	-	-	-	-	-	-	-	-1	-	I1L7I0_SOYBN	UPI000233C36D	-
GLYMA10G00950	10:673124-673124	G	upstream_gene_variant	MODIFIER	GLYMA10G00950.1	protein_coding	-	-	-	-	-	-	-	-1	-	I1L7H9_SOYBN	UPI000233D0BC	-
GLYMA10G00960	10:673124-673124	G	downstream_gene_variant	MODIFIER	GLYMA10G00960.1	protein_coding	-	-	-	-	-	-	-	-1	-	I1L7I0_SOYBN	UPI000233C36D	-
GLYMA10G00950	10:673184-673184	A	upstream_gene_variant	MODIFIER	GLYMA10G00950.1	protein_coding	-	-	-	-	-	-	-	-1	-	I1L7H9_SOYBN	UPI000233D0BC	-
GLYMA10G00960	10:673184-673184	A	downstream_gene_variant	MODIFIER	GLYMA10G00960.1	protein_coding	-	-	-	-	-	-	-	-1	-	I1L7I0_SOYBN	UPI000233C36D	-
GLYMA10G00950	10:673570-673570	G	upstream_gene_variant	MODIFIER	GLYMA10G00950.1	protein_coding	-	-	-	-	-	-	-	-1	-	I1L7H9_SOYBN	UPI000233D0BC	-
GLYMA10G00960	10:673570-673570	G	downstream_gene_variant	MODIFIER	GLYMA10G00960.1	protein_coding	-	-	-	-	-	-	-	-1	-	I1L7I0_SOYBN	UPI000233C36D	-
GLYMA10G00950	10:674179-674179	TC	upstream_gene_variant	MODIFIER	GLYMA10G00950.1	protein_coding	-	-	-	-	-	-	-	-1	-	I1L7H9_SOYBN	UPI000233D0BC	-
GLYMA10G00960	10:674179-674179	TC	downstream_gene_variant	MODIFIER	GLYMA10G00960.1	protein_coding	-	-	-	-	-	-	-	-1	-	I1L7I0_SOYBN	UPI000233C36D	-
GLYMA10G00950	10:674241-674241	A	upstream_gene_variant	MODIFIER	GLYMA10G00950.1	protein_coding	-	-	-	-	-	-	-	-1	-	I1L7H9_SOYBN	UPI000233D0BC	-
GLYMA10G00960	10:674241-674241	A	downstream_gene_variant	MODIFIER	GLYMA10G00960.1	protein_coding	-	-	-	-	-	-	-	-1	-	I1L7I0_SOYBN	UPI000233C36D	-
GLYMA10G00950	10:674265-674266	-	upstream_gene_variant	MODIFIER	GLYMA10G00950.1	protein_coding	-	-	-	-	-	-	-	-1	-	I1L7H9_SOYBN	UPI000233D0BC	-
GLYMA10G00960	10:674265-674266	-	downstream_gene_variant	MODIFIER	GLYMA10G00960.1	protein_coding	-	-	-	-	-	-	-	-1	-	I1L7I0_SOYBN	UPI000233C36D	-
GLYMA10G00950	10:674344-674344	C	upstream_gene_variant	MODIFIER	GLYMA10G00950.1	protein_coding	-	-	-	-	-	-	-	-1	-	I1L7H9_SOYBN	UPI000233D0BC	-
GLYMA10G00960	10:674344-674344	C	downstream_gene_variant	MODIFIER	GLYMA10G00960.1	protein_coding	-	-	-	-	-	-	-	-1	-	I1L7I0_SOYBN	UPI000233C36D	-
GLYMA10G00950	10:674427-674427	A	upstream_gene_variant	MODIFIER	GLYMA10G00950.1	protein_coding	-	-	-	-	-	-	-	-1	-	I1L7H9_SOYBN	UPI000233D0BC	-
GLYMA10G00960	10:674427-674427	A	downstream_gene_variant	MODIFIER	GLYMA10G00960.1	protein_coding	-	-	-	-	-	-	-	-1	-	I1L7I0_SOYBN	UPI000233C36D	-
GLYMA10G00960	10:676057-676057	AATCATA	downstream_gene_variant	MODIFIER	GLYMA10G00960.1	protein_coding	-	-	-	-	-	-	-	-1	-	I1L7I0_SOYBN	UPI000233C36D	-
GLYMA10G00960	10:677998-677998	T	intron_variant	MODIFIER	GLYMA10G00960.1	protein_coding	GLYMA10G00960.1:c.176-58dupA	-	-	-	-	-	-	-1	-	I1L7I0_SOYBN	UPI000233C36D	-
GLYMA10G00971	10:677998-677998	T	upstream_gene_variant	MODIFIER	GLYMA10G00971.1	protein_coding	-	-	-	-	-	-	-	1	-	K7LGR3_SOYBN	UPI000294AC92	-
GLYMA10G00960	10:679735-679735	CA	intron_variant	MODIFIER	GLYMA10G00960.1	protein_coding	GLYMA10G00960.1:c.175+320_175+321insTG	-	-	-	-	-	-	-1	-	I1L7I0_SOYBN	UPI000233C36D	-
GLYMA10G00971	10:679735-679735	CA	upstream_gene_variant	MODIFIER	GLYMA10G00971.1	protein_coding	-	-	-	-	-	-	-	1	-	K7LGR3_SOYBN	UPI000294AC92	-
GLYMA10G00960	10:682357-682357	T	upstream_gene_variant	MODIFIER	GLYMA10G00960.1	protein_coding	-	-	-	-	-	-	-	-1	-	I1L7I0_SOYBN	UPI000233C36D	-
GLYMA10G00971	10:682357-682357	T	upstream_gene_variant	MODIFIER	GLYMA10G00971.1	protein_coding	-	-	-	-	-	-	-	1	-	K7LGR3_SOYBN	UPI000294AC92	-
GLYMA10G00960	10:684779-684779	A	upstream_gene_variant	MODIFIER	GLYMA10G00960.1	protein_coding	-	-	-	-	-	-	-	-1	-	I1L7I0_SOYBN	UPI000233C36D	-
GLYMA10G00971	10:684779-684779	A	downstream_gene_variant	MODIFIER	GLYMA10G00971.1	protein_coding	-	-	-	-	-	-	-	1	-	K7LGR3_SOYBN	UPI000294AC92	-
GLYMA10G00971	10:686225-686225	GTTTTTTTTT	downstream_gene_variant	MODIFIER	GLYMA10G00971.1	protein_coding	-	-	-	-	-	-	-	1	-	K7LGR3_SOYBN	UPI000294AC92	-
GLYMA10G00971	10:686228-686232	-	downstream_gene_variant	MODIFIER	GLYMA10G00971.1	protein_coding	-	-	-	-	-	-	-	1	-	K7LGR3_SOYBN	UPI000294AC92	-
GLYMA10G00971	10:687085-687086	-	downstream_gene_variant	MODIFIER	GLYMA10G00971.1	protein_coding	-	-	-	-	-	-	-	1	-	K7LGR3_SOYBN	UPI000294AC92	-
GLYMA10G00971	10:687232-687232	AAA	downstream_gene_variant	MODIFIER	GLYMA10G00971.1	protein_coding	-	-	-	-	-	-	-	1	-	K7LGR3_SOYBN	UPI000294AC92	-
GLYMA10G00980	10:687232-687232	AAA	downstream_gene_variant	MODIFIER	GLYMA10G00980.1	protein_coding	-	-	-	-	-	-	-	-1	-	I1L7I1_SOYBN	UPI0001B36C03	-
GLYMA10G00980	10:690810-690810	G	downstream_gene_variant	MODIFIER	GLYMA10G00980.1	protein_coding	-	-	-	-	-	-	-	-1	-	I1L7I1_SOYBN	UPI0001B36C03	-
GLYMA10G00980	10:690826-690827	-	downstream_gene_variant	MODIFIER	GLYMA10G00980.1	protein_coding	-	-	-	-	-	-	-	-1	-	I1L7I1_SOYBN	UPI0001B36C03	-
GLYMA10G00980	10:690859-690860	-	downstream_gene_variant	MODIFIER	GLYMA10G00980.1	protein_coding	-	-	-	-	-	-	-	-1	-	I1L7I1_SOYBN	UPI0001B36C03	-
GLYMA10G00980	10:691242-691242	AATTATTTATAC	downstream_gene_variant	MODIFIER	GLYMA10G00980.1	protein_coding	-	-	-	-	-	-	-	-1	-	I1L7I1_SOYBN	UPI0001B36C03	-
GLYMA10G00980	10:691692-691692	ATTTTTTTATGGAGGG	downstream_gene_variant	MODIFIER	GLYMA10G00980.1	protein_coding	-	-	-	-	-	-	-	-1	-	I1L7I1_SOYBN	UPI0001B36C03	-
GLYMA10G00980	10:691925-691925	G	downstream_gene_variant	MODIFIER	GLYMA10G00980.1	protein_coding	-	-	-	-	-	-	-	-1	-	I1L7I1_SOYBN	UPI0001B36C03	-
GLYMA10G00980	10:693444-693444	A	upstream_gene_variant	MODIFIER	GLYMA10G00980.1	protein_coding	-	-	-	-	-	-	-	-1	-	I1L7I1_SOYBN	UPI0001B36C03	-
GLYMA10G00980	10:694963-694963	G	upstream_gene_variant	MODIFIER	GLYMA10G00980.1	protein_coding	-	-	-	-	-	-	-	-1	-	I1L7I1_SOYBN	UPI0001B36C03	-
GLYMA10G00980	10:695127-695128	-	upstream_gene_variant	MODIFIER	GLYMA10G00980.1	protein_coding	-	-	-	-	-	-	-	-1	-	I1L7I1_SOYBN	UPI0001B36C03	-
GLYMA10G00980	10:695168-695170	-	upstream_gene_variant	MODIFIER	GLYMA10G00980.1	protein_coding	-	-	-	-	-	-	-	-1	-	I1L7I1_SOYBN	UPI0001B36C03	-
GLYMA10G00980	10:695351-695351	CA	upstream_gene_variant	MODIFIER	GLYMA10G00980.1	protein_coding	-	-	-	-	-	-	-	-1	-	I1L7I1_SOYBN	UPI0001B36C03	-
GLYMA10G00980	10:695505-695505	TT	upstream_gene_variant	MODIFIER	GLYMA10G00980.1	protein_coding	-	-	-	-	-	-	-	-1	-	I1L7I1_SOYBN	UPI0001B36C03	-
GLYMA10G00980	10:695520-695520	T	upstream_gene_variant	MODIFIER	GLYMA10G00980.1	protein_coding	-	-	-	-	-	-	-	-1	-	I1L7I1_SOYBN	UPI0001B36C03	-
GLYMA10G00980	10:695555-695558	-	upstream_gene_variant	MODIFIER	GLYMA10G00980.1	protein_coding	-	-	-	-	-	-	-	-1	-	I1L7I1_SOYBN	UPI0001B36C03	-
GLYMA10G00980	10:695588-695588	TTT	upstream_gene_variant	MODIFIER	GLYMA10G00980.1	protein_coding	-	-	-	-	-	-	-	-1	-	I1L7I1_SOYBN	UPI0001B36C03	-
GLYMA10G00980	10:695970-695970	A	upstream_gene_variant	MODIFIER	GLYMA10G00980.1	protein_coding	-	-	-	-	-	-	-	-1	-	I1L7I1_SOYBN	UPI0001B36C03	-
GLYMA10G00980	10:696148-696148	A	upstream_gene_variant	MODIFIER	GLYMA10G00980.1	protein_coding	-	-	-	-	-	-	-	-1	-	I1L7I1_SOYBN	UPI0001B36C03	-
GLYMA10G00980	10:697455-697461	-	upstream_gene_variant	MODIFIER	GLYMA10G00980.1	protein_coding	-	-	-	-	-	-	-	-1	-	I1L7I1_SOYBN	UPI0001B36C03	-
-	10:698433-698433	AGGGTTGAAT	intergenic_variant	MODIFIER	-	-	-	-	-	-	-	-	-	-	-	-	-	-
GLYMA10G00990	10:702195-702196	-	downstream_gene_variant	MODIFIER	GLYMA10G00990.1	protein_coding	-	-	-	-	-	-	-	-1	-	I1L7I2_SOYBN	UPI000233C36E	-
GLYMA10G00990	10:709510-709510	C	upstream_gene_variant	MODIFIER	GLYMA10G00990.1	protein_coding	-	-	-	-	-	-	-	-1	-	I1L7I2_SOYBN	UPI000233C36E	-
GLYMA10G00990	10:711171-711171	T	upstream_gene_variant	MODIFIER	GLYMA10G00990.1	protein_coding	-	-	-	-	-	-	-	-1	-	I1L7I2_SOYBN	UPI000233C36E	-
GLYMA10G00990	10:711582-711582	T	upstream_gene_variant	MODIFIER	GLYMA10G00990.1	protein_coding	-	-	-	-	-	-	-	-1	-	I1L7I2_SOYBN	UPI000233C36E	-
-	10:711851-711851	A	intergenic_variant	MODIFIER	-	-	-	-	-	-	-	-	-	-	-	-	-	-
-	10:711938-711939	-	intergenic_variant	MODIFIER	-	-	-	-	-	-	-	-	-	-	-	-	-	-
GLYMA10G01000	10:714238-714238	T	upstream_gene_variant	MODIFIER	GLYMA10G01000.1	protein_coding	-	-	-	-	-	-	-	1	-	I1L7I3_SOYBN	UPI000233C36F	-
GLYMA10G01000	10:715262-715262	T	upstream_gene_variant	MODIFIER	GLYMA10G01000.1	protein_coding	-	-	-	-	-	-	-	1	-	I1L7I3_SOYBN	UPI000233C36F	-
GLYMA10G01000	10:715758-715758	C	upstream_gene_variant	MODIFIER	GLYMA10G01000.1	protein_coding	-	-	-	-	-	-	-	1	-	I1L7I3_SOYBN	UPI000233C36F	-
GLYMA10G01000	10:716117-716122	-	upstream_gene_variant	MODIFIER	GLYMA10G01000.1	protein_coding	-	-	-	-	-	-	-	1	-	I1L7I3_SOYBN	UPI000233C36F	-
GLYMA10G01000	10:716124-716131	-	upstream_gene_variant	MODIFIER	GLYMA10G01000.1	protein_coding	-	-	-	-	-	-	-	1	-	I1L7I3_SOYBN	UPI000233C36F	-
GLYMA10G01000	10:716589-716590	-	upstream_gene_variant	MODIFIER	GLYMA10G01000.1	protein_coding	-	-	-	-	-	-	-	1	-	I1L7I3_SOYBN	UPI000233C36F	-
GLYMA10G01000	10:717033-717033	AAA	upstream_gene_variant	MODIFIER	GLYMA10G01000.1	protein_coding	-	-	-	-	-	-	-	1	-	I1L7I3_SOYBN	UPI000233C36F	-
GLYMA10G01000	10:719575-719575	A	downstream_gene_variant	MODIFIER	GLYMA10G01000.1	protein_coding	-	-	-	-	-	-	-	1	-	I1L7I3_SOYBN	UPI000233C36F	-
GLYMA10G01010	10:719575-719575	A	upstream_gene_variant	MODIFIER	GLYMA10G01010.1	protein_coding	-	-	-	-	-	-	-	1	-	I1L7I4_SOYBN	UPI0001BA6488	-
GLYMA10G01010	10:719575-719575	A	upstream_gene_variant	MODIFIER	GLYMA10G01010.2	protein_coding	-	-	-	-	-	-	-	1	-	I1L7I5_SOYBN	UPI00023C8A51	-
GLYMA10G01000	10:723389-723389	T	downstream_gene_variant	MODIFIER	GLYMA10G01000.1	protein_coding	-	-	-	-	-	-	-	1	-	I1L7I3_SOYBN	UPI000233C36F	-
GLYMA10G01010	10:723389-723389	T	upstream_gene_variant	MODIFIER	GLYMA10G01010.1	protein_coding	-	-	-	-	-	-	-	1	-	I1L7I4_SOYBN	UPI0001BA6488	-
GLYMA10G01010	10:723389-723389	T	upstream_gene_variant	MODIFIER	GLYMA10G01010.2	protein_coding	-	-	-	-	-	-	-	1	-	I1L7I5_SOYBN	UPI00023C8A51	-
GLYMA10G01010	10:724720-724721	-	intron_variant	MODIFIER	GLYMA10G01010.1	protein_coding	GLYMA10G01010.1:c.98+253delT	-	-	-	-	-	-	1	-	I1L7I4_SOYBN	UPI0001BA6488	-
GLYMA10G01010	10:724720-724721	-	intron_variant	MODIFIER	GLYMA10G01010.2	protein_coding	GLYMA10G01010.2:c.-30+123delT	-	-	-	-	-	-	1	-	I1L7I5_SOYBN	UPI00023C8A51	-
GLYMA10G01010	10:724957-724957	T	intron_variant	MODIFIER	GLYMA10G01010.1	protein_coding	GLYMA10G01010.1:c.99-213dupT	-	-	-	-	-	-	1	-	I1L7I4_SOYBN	UPI0001BA6488	-
GLYMA10G01010	10:724957-724957	T	intron_variant	MODIFIER	GLYMA10G01010.2	protein_coding	GLYMA10G01010.2:c.-29-213dupT	-	-	-	-	-	-	1	-	I1L7I5_SOYBN	UPI00023C8A51	-
GLYMA10G01010	10:726324-726325	-	intron_variant	MODIFIER	GLYMA10G01010.1	protein_coding	GLYMA10G01010.1:c.402+69delT	-	-	-	-	-	-	1	-	I1L7I4_SOYBN	UPI0001BA6488	-
GLYMA10G01010	10:726324-726325	-	intron_variant	MODIFIER	GLYMA10G01010.2	protein_coding	GLYMA10G01010.2:c.318+69delT	-	-	-	-	-	-	1	-	I1L7I5_SOYBN	UPI00023C8A51	-
GLYMA10G01010	10:731284-731284	G	downstream_gene_variant	MODIFIER	GLYMA10G01010.1	protein_coding	-	-	-	-	-	-	-	1	-	I1L7I4_SOYBN	UPI0001BA6488	-
GLYMA10G01010	10:731284-731284	G	downstream_gene_variant	MODIFIER	GLYMA10G01010.2	protein_coding	-	-	-	-	-	-	-	1	-	I1L7I5_SOYBN	UPI00023C8A51	-
GLYMA10G01020	10:731284-731284	G	downstream_gene_variant	MODIFIER	GLYMA10G01020.1	protein_coding	-	-	-	-	-	-	-	-1	-	I1L7I6_SOYBN	UPI000233D4FD	-
GLYMA10G01020	10:731284-731284	G	downstream_gene_variant	MODIFIER	GLYMA10G01020.2	protein_coding	-	-	-	-	-	-	-	-1	-	I1L7I7_SOYBN	UPI00023C8A53	-
GLYMA10G01030	10:743661-743661	TT	upstream_gene_variant	MODIFIER	GLYMA10G01030.1	protein_coding	-	-	-	-	-	-	-	-1	-	C6TKT7_SOYBN	UPI0001B16DAA	-
GLYMA10G01030	10:743661-743661	TT	upstream_gene_variant	MODIFIER	GLYMA10G01030.2	protein_coding	-	-	-	-	-	-	-	-1	-	I1L7I9_SOYBN	UPI00023C8A55	-
GLYMA10G01030	10:743661-743661	TT	upstream_gene_variant	MODIFIER	GLYMA10G01030.3	protein_coding	-	-	-	-	-	-	-	-1	-	C6TKT7_SOYBN	UPI0001B16DAA	-
GLYMA10G01050	10:743661-743661	TT	downstream_gene_variant	MODIFIER	GLYMA10G01050.2	protein_coding	-	-	-	-	-	-	-	-1	-	K7LGR6_SOYBN	UPI00023C8A56	-
GLYMA10G01050	10:743661-743661	TT	downstream_gene_variant	MODIFIER	GLYMA10G01050.3	protein_coding	-	-	-	-	-	-	-	-1	-	K7LGR6_SOYBN	UPI00023C8A56	-
GLYMA10G01030	10:744885-744885	T	upstream_gene_variant	MODIFIER	GLYMA10G01030.1	protein_coding	-	-	-	-	-	-	-	-1	-	C6TKT7_SOYBN	UPI0001B16DAA	-
GLYMA10G01030	10:744885-744885	T	upstream_gene_variant	MODIFIER	GLYMA10G01030.2	protein_coding	-	-	-	-	-	-	-	-1	-	I1L7I9_SOYBN	UPI00023C8A55	-
GLYMA10G01050	10:744885-744885	T	downstream_gene_variant	MODIFIER	GLYMA10G01050.2	protein_coding	-	-	-	-	-	-	-	-1	-	K7LGR6_SOYBN	UPI00023C8A56	-
GLYMA10G01050	10:744885-744885	T	downstream_gene_variant	MODIFIER	GLYMA10G01050.3	protein_coding	-	-	-	-	-	-	-	-1	-	K7LGR6_SOYBN	UPI00023C8A56	-
GLYMA10G01030	10:745062-745062	T	upstream_gene_variant	MODIFIER	GLYMA10G01030.1	protein_coding	-	-	-	-	-	-	-	-1	-	C6TKT7_SOYBN	UPI0001B16DAA	-
GLYMA10G01030	10:745062-745062	T	upstream_gene_variant	MODIFIER	GLYMA10G01030.2	protein_coding	-	-	-	-	-	-	-	-1	-	I1L7I9_SOYBN	UPI00023C8A55	-
GLYMA10G01050	10:745062-745062	T	downstream_gene_variant	MODIFIER	GLYMA10G01050.2	protein_coding	-	-	-	-	-	-	-	-1	-	K7LGR6_SOYBN	UPI00023C8A56	-
GLYMA10G01050	10:745062-745062	T	downstream_gene_variant	MODIFIER	GLYMA10G01050.3	protein_coding	-	-	-	-	-	-	-	-1	-	K7LGR6_SOYBN	UPI00023C8A56	-
GLYMA10G01030	10:745638-745638	AAT	upstream_gene_variant	MODIFIER	GLYMA10G01030.1	protein_coding	-	-	-	-	-	-	-	-1	-	C6TKT7_SOYBN	UPI0001B16DAA	-
GLYMA10G01030	10:745638-745638	AAT	upstream_gene_variant	MODIFIER	GLYMA10G01030.2	protein_coding	-	-	-	-	-	-	-	-1	-	I1L7I9_SOYBN	UPI00023C8A55	-
GLYMA10G01050	10:745638-745638	AAT	downstream_gene_variant	MODIFIER	GLYMA10G01050.2	protein_coding	-	-	-	-	-	-	-	-1	-	K7LGR6_SOYBN	UPI00023C8A56	-
GLYMA10G01050	10:745638-745638	AAT	downstream_gene_variant	MODIFIER	GLYMA10G01050.3	protein_coding	-	-	-	-	-	-	-	-1	-	K7LGR6_SOYBN	UPI00023C8A56	-
GLYMA10G01030	10:745640-745640	ACATT	upstream_gene_variant	MODIFIER	GLYMA10G01030.1	protein_coding	-	-	-	-	-	-	-	-1	-	C6TKT7_SOYBN	UPI0001B16DAA	-
GLYMA10G01030	10:745640-745640	ACATT	upstream_gene_variant	MODIFIER	GLYMA10G01030.2	protein_coding	-	-	-	-	-	-	-	-1	-	I1L7I9_SOYBN	UPI00023C8A55	-
GLYMA10G01050	10:745640-745640	ACATT	downstream_gene_variant	MODIFIER	GLYMA10G01050.2	protein_coding	-	-	-	-	-	-	-	-1	-	K7LGR6_SOYBN	UPI00023C8A56	-
GLYMA10G01050	10:745640-745640	ACATT	downstream_gene_variant	MODIFIER	GLYMA10G01050.3	protein_coding	-	-	-	-	-	-	-	-1	-	K7LGR6_SOYBN	UPI00023C8A56	-
GLYMA10G01030	10:745995-745995	A	upstream_gene_variant	MODIFIER	GLYMA10G01030.1	protein_coding	-	-	-	-	-	-	-	-1	-	C6TKT7_SOYBN	UPI0001B16DAA	-
GLYMA10G01030	10:745995-745995	A	upstream_gene_variant	MODIFIER	GLYMA10G01030.2	protein_coding	-	-	-	-	-	-	-	-1	-	I1L7I9_SOYBN	UPI00023C8A55	-
GLYMA10G01050	10:745995-745995	A	downstream_gene_variant	MODIFIER	GLYMA10G01050.2	protein_coding	-	-	-	-	-	-	-	-1	-	K7LGR6_SOYBN	UPI00023C8A56	-
GLYMA10G01050	10:745995-745995	A	downstream_gene_variant	MODIFIER	GLYMA10G01050.3	protein_coding	-	-	-	-	-	-	-	-1	-	K7LGR6_SOYBN	UPI00023C8A56	-
GLYMA10G01050	10:753040-753040	T	upstream_gene_variant	MODIFIER	GLYMA10G01050.2	protein_coding	-	-	-	-	-	-	-	-1	-	K7LGR6_SOYBN	UPI00023C8A56	-
GLYMA10G01050	10:753040-753040	T	upstream_gene_variant	MODIFIER	GLYMA10G01050.3	protein_coding	-	-	-	-	-	-	-	-1	-	K7LGR6_SOYBN	UPI00023C8A56	-
GLYMA10G01060	10:753040-753040	T	upstream_gene_variant	MODIFIER	GLYMA10G01060.1	protein_coding	-	-	-	-	-	-	-	1	-	I1L7J1_SOYBN	UPI00023C8A59	-
GLYMA10G01060	10:753040-753040	T	upstream_gene_variant	MODIFIER	GLYMA10G01060.2	protein_coding	-	-	-	-	-	-	-	1	-	I1L7J2_SOYBN	UPI00023C8A5A	-
GLYMA10G01070	10:753040-753040	T	downstream_gene_variant	MODIFIER	GLYMA10G01070.1	protein_coding	-	-	-	-	-	-	-	-1	-	I1L7J3_SOYBN	UPI0001CAA062	-
GLYMA10G01050	10:753787-753795	-	upstream_gene_variant	MODIFIER	GLYMA10G01050.2	protein_coding	-	-	-	-	-	-	-	-1	-	K7LGR6_SOYBN	UPI00023C8A56	-
GLYMA10G01050	10:753787-753795	-	upstream_gene_variant	MODIFIER	GLYMA10G01050.3	protein_coding	-	-	-	-	-	-	-	-1	-	K7LGR6_SOYBN	UPI00023C8A56	-
GLYMA10G01060	10:753787-753795	-	5_prime_UTR_variant	MODIFIER	GLYMA10G01060.1	protein_coding	GLYMA10G01060.1:c.-72_-65delCTCTCTCA	-	136-143	-	-	-	-	1	-	I1L7J1_SOYBN	UPI00023C8A59	-
GLYMA10G01060	10:753787-753795	-	5_prime_UTR_variant	MODIFIER	GLYMA10G01060.2	protein_coding	GLYMA10G01060.2:c.-72_-65delCTCTCTCA	-	136-143	-	-	-	-	1	-	I1L7J2_SOYBN	UPI00023C8A5A	-
GLYMA10G01070	10:753787-753795	-	downstream_gene_variant	MODIFIER	GLYMA10G01070.1	protein_coding	-	-	-	-	-	-	-	-1	-	I1L7J3_SOYBN	UPI0001CAA062	-
GLYMA10G01050	10:755230-755231	-	upstream_gene_variant	MODIFIER	GLYMA10G01050.2	protein_coding	-	-	-	-	-	-	-	-1	-	K7LGR6_SOYBN	UPI00023C8A56	-
GLYMA10G01050	10:755230-755231	-	upstream_gene_variant	MODIFIER	GLYMA10G01050.3	protein_coding	-	-	-	-	-	-	-	-1	-	K7LGR6_SOYBN	UPI00023C8A56	-
GLYMA10G01060	10:755230-755231	-	intron_variant	MODIFIER	GLYMA10G01060.1	protein_coding	GLYMA10G01060.1:c.183+18delT	-	-	-	-	-	-	1	-	I1L7J1_SOYBN	UPI00023C8A59	-
GLYMA10G01060	10:755230-755231	-	intron_variant	MODIFIER	GLYMA10G01060.2	protein_coding	GLYMA10G01060.2:c.183+18delT	-	-	-	-	-	-	1	-	I1L7J2_SOYBN	UPI00023C8A5A	-
GLYMA10G01070	10:755230-755231	-	downstream_gene_variant	MODIFIER	GLYMA10G01070.1	protein_coding	-	-	-	-	-	-	-	-1	-	I1L7J3_SOYBN	UPI0001CAA062	-
GLYMA10G01060	10:757193-757193	A	downstream_gene_variant	MODIFIER	GLYMA10G01060.1	protein_coding	-	-	-	-	-	-	-	1	-	I1L7J1_SOYBN	UPI00023C8A59	-
GLYMA10G01060	10:757193-757193	A	downstream_gene_variant	MODIFIER	GLYMA10G01060.2	protein_coding	-	-	-	-	-	-	-	1	-	I1L7J2_SOYBN	UPI00023C8A5A	-
GLYMA10G01070	10:757193-757193	A	downstream_gene_variant	MODIFIER	GLYMA10G01070.1	protein_coding	-	-	-	-	-	-	-	-1	-	I1L7J3_SOYBN	UPI0001CAA062	-
GLYMA10G01091	10:757193-757193	A	upstream_gene_variant	MODIFIER	GLYMA10G01091.1	protein_coding	-	-	-	-	-	-	-	1	-	K7LGR7_SOYBN	UPI000294EBE0	-
GLYMA10G01060	10:760073-760079	-	downstream_gene_variant	MODIFIER	GLYMA10G01060.1	protein_coding	-	-	-	-	-	-	-	1	-	I1L7J1_SOYBN	UPI00023C8A59	-
GLYMA10G01060	10:760073-760079	-	downstream_gene_variant	MODIFIER	GLYMA10G01060.2	protein_coding	-	-	-	-	-	-	-	1	-	I1L7J2_SOYBN	UPI00023C8A5A	-
GLYMA10G01070	10:760073-760079	-	upstream_gene_variant	MODIFIER	GLYMA10G01070.1	protein_coding	-	-	-	-	-	-	-	-1	-	I1L7J3_SOYBN	UPI0001CAA062	-
GLYMA10G01091	10:760073-760079	-	upstream_gene_variant	MODIFIER	GLYMA10G01091.1	protein_coding	-	-	-	-	-	-	-	1	-	K7LGR7_SOYBN	UPI000294EBE0	-
GLYMA10G01060	10:760259-760260	-	downstream_gene_variant	MODIFIER	GLYMA10G01060.1	protein_coding	-	-	-	-	-	-	-	1	-	I1L7J1_SOYBN	UPI00023C8A59	-
GLYMA10G01060	10:760259-760260	-	downstream_gene_variant	MODIFIER	GLYMA10G01060.2	protein_coding	-	-	-	-	-	-	-	1	-	I1L7J2_SOYBN	UPI00023C8A5A	-
GLYMA10G01070	10:760259-760260	-	upstream_gene_variant	MODIFIER	GLYMA10G01070.1	protein_coding	-	-	-	-	-	-	-	-1	-	I1L7J3_SOYBN	UPI0001CAA062	-
GLYMA10G01091	10:760259-760260	-	upstream_gene_variant	MODIFIER	GLYMA10G01091.1	protein_coding	-	-	-	-	-	-	-	1	-	K7LGR7_SOYBN	UPI000294EBE0	-
GLYMA10G01060	10:760434-760434	CAGG	downstream_gene_variant	MODIFIER	GLYMA10G01060.1	protein_coding	-	-	-	-	-	-	-	1	-	I1L7J1_SOYBN	UPI00023C8A59	-
GLYMA10G01060	10:760434-760434	CAGG	downstream_gene_variant	MODIFIER	GLYMA10G01060.2	protein_coding	-	-	-	-	-	-	-	1	-	I1L7J2_SOYBN	UPI00023C8A5A	-
GLYMA10G01070	10:760434-760434	CAGG	upstream_gene_variant	MODIFIER	GLYMA10G01070.1	protein_coding	-	-	-	-	-	-	-	-1	-	I1L7J3_SOYBN	UPI0001CAA062	-
GLYMA10G01091	10:760434-760434	CAGG	upstream_gene_variant	MODIFIER	GLYMA10G01091.1	protein_coding	-	-	-	-	-	-	-	1	-	K7LGR7_SOYBN	UPI000294EBE0	-
GLYMA10G01070	10:761688-761688	T	upstream_gene_variant	MODIFIER	GLYMA10G01070.1	protein_coding	-	-	-	-	-	-	-	-1	-	I1L7J3_SOYBN	UPI0001CAA062	-
GLYMA10G01091	10:761688-761688	T	intron_variant	MODIFIER	GLYMA10G01091.1	protein_coding	GLYMA10G01091.1:c.496+37_496+38insT	-	-	-	-	-	-	1	-	K7LGR7_SOYBN	UPI000294EBE0	-
GLYMA10G01070	10:762815-762815	A	upstream_gene_variant	MODIFIER	GLYMA10G01070.1	protein_coding	-	-	-	-	-	-	-	-1	-	I1L7J3_SOYBN	UPI0001CAA062	-
GLYMA10G01091	10:762815-762815	A	intron_variant	MODIFIER	GLYMA10G01091.1	protein_coding	GLYMA10G01091.1:c.1067-237dupA	-	-	-	-	-	-	1	-	K7LGR7_SOYBN	UPI000294EBE0	-
GLYMA10G01091	10:764032-764032	C	intron_variant	MODIFIER	GLYMA10G01091.1	protein_coding	GLYMA10G01091.1:c.1242+803_1242+804insC	-	-	-	-	-	-	1	-	K7LGR7_SOYBN	UPI000294EBE0	-
GLYMA10G01091	10:766296-766296	TTT	intron_variant	MODIFIER	GLYMA10G01091.1	protein_coding	GLYMA10G01091.1:c.1243-1265_1243-1263dupTTT	-	-	-	-	-	-	1	-	K7LGR7_SOYBN	UPI000294EBE0	-
GLYMA10G01091	10:767351-767351	AGCCG	intron_variant	MODIFIER	GLYMA10G01091.1	protein_coding	GLYMA10G01091.1:c.1243-206_1243-202dupAGCCG	-	-	-	-	-	-	1	-	K7LGR7_SOYBN	UPI000294EBE0	-
GLYMA10G01091	10:767889-767889	T	downstream_gene_variant	MODIFIER	GLYMA10G01091.1	protein_coding	-	-	-	-	-	-	-	1	-	K7LGR7_SOYBN	UPI000294EBE0	-
GLYMA10G01091	10:767944-767944	T	downstream_gene_variant	MODIFIER	GLYMA10G01091.1	protein_coding	-	-	-	-	-	-	-	1	-	K7LGR7_SOYBN	UPI000294EBE0	-
GLYMA10G01091	10:768015-768033	-	downstream_gene_variant	MODIFIER	GLYMA10G01091.1	protein_coding	-	-	-	-	-	-	-	1	-	K7LGR7_SOYBN	UPI000294EBE0	-
GLYMA10G01091	10:768741-768741	TT	downstream_gene_variant	MODIFIER	GLYMA10G01091.1	protein_coding	-	-	-	-	-	-	-	1	-	K7LGR7_SOYBN	UPI000294EBE0	-
GLYMA10G01091	10:771009-771009	T	downstream_gene_variant	MODIFIER	GLYMA10G01091.1	protein_coding	-	-	-	-	-	-	-	1	-	K7LGR7_SOYBN	UPI000294EBE0	-
GLYMA10G01091	10:771458-771461	-	downstream_gene_variant	MODIFIER	GLYMA10G01091.1	protein_coding	-	-	-	-	-	-	-	1	-	K7LGR7_SOYBN	UPI000294EBE0	-
GLYMA10G01091	10:772562-772562	T	downstream_gene_variant	MODIFIER	GLYMA10G01091.1	protein_coding	-	-	-	-	-	-	-	1	-	K7LGR7_SOYBN	UPI000294EBE0	-
GLYMA10G01110	10:772562-772562	T	downstream_gene_variant	MODIFIER	GLYMA10G01110.2	protein_coding	-	-	-	-	-	-	-	-1	-	K7LGR8_SOYBN	UPI000294CF31	-
GLYMA10G01110	10:776346-776346	T	downstream_gene_variant	MODIFIER	GLYMA10G01110.2	protein_coding	-	-	-	-	-	-	-	-1	-	K7LGR8_SOYBN	UPI000294CF31	-
GLYMA10G01110	10:777083-777083	T	downstream_gene_variant	MODIFIER	GLYMA10G01110.2	protein_coding	-	-	-	-	-	-	-	-1	-	K7LGR8_SOYBN	UPI000294CF31	-
GLYMA10G01110	10:777396-777396	TGTT	downstream_gene_variant	MODIFIER	GLYMA10G01110.2	protein_coding	-	-	-	-	-	-	-	-1	-	K7LGR8_SOYBN	UPI000294CF31	-
GLYMA10G01110	10:777448-777448	C	3_prime_UTR_variant	MODIFIER	GLYMA10G01110.2	protein_coding	GLYMA10G01110.2:c.*765dupG	-	1857-1858	-	-	-	-	-1	-	K7LGR8_SOYBN	UPI000294CF31	-
GLYMA10G01110	10:777464-777464	A	3_prime_UTR_variant	MODIFIER	GLYMA10G01110.2	protein_coding	GLYMA10G01110.2:c.*749_*750insT	-	1841-1842	-	-	-	-	-1	-	K7LGR8_SOYBN	UPI000294CF31	-
GLYMA10G01110	10:777465-777465	TGTCA	3_prime_UTR_variant	MODIFIER	GLYMA10G01110.2	protein_coding	GLYMA10G01110.2:c.*748_*749insTGACA	-	1840-1841	-	-	-	-	-1	-	K7LGR8_SOYBN	UPI000294CF31	-
GLYMA10G01110	10:780177-780177	A	upstream_gene_variant	MODIFIER	GLYMA10G01110.2	protein_coding	-	-	-	-	-	-	-	-1	-	K7LGR8_SOYBN	UPI000294CF31	-
GLYMA10G01110	10:780244-780244	T	upstream_gene_variant	MODIFIER	GLYMA10G01110.2	protein_coding	-	-	-	-	-	-	-	-1	-	K7LGR8_SOYBN	UPI000294CF31	-
GLYMA10G01110	10:780334-780334	T	upstream_gene_variant	MODIFIER	GLYMA10G01110.2	protein_coding	-	-	-	-	-	-	-	-1	-	K7LGR8_SOYBN	UPI000294CF31	-
GLYMA10G01110	10:781668-781668	T	upstream_gene_variant	MODIFIER	GLYMA10G01110.2	protein_coding	-	-	-	-	-	-	-	-1	-	K7LGR8_SOYBN	UPI000294CF31	-
GLYMA10G01110	10:782038-782038	A	upstream_gene_variant	MODIFIER	GLYMA10G01110.2	protein_coding	-	-	-	-	-	-	-	-1	-	K7LGR8_SOYBN	UPI000294CF31	-
GLYMA10G01110	10:782307-782307	T	upstream_gene_variant	MODIFIER	GLYMA10G01110.2	protein_coding	-	-	-	-	-	-	-	-1	-	K7LGR8_SOYBN	UPI000294CF31	-
GLYMA10G01110	10:782373-782381	-	upstream_gene_variant	MODIFIER	GLYMA10G01110.2	protein_coding	-	-	-	-	-	-	-	-1	-	K7LGR8_SOYBN	UPI000294CF31	-
GLYMA10G01110	10:782575-782578	-	upstream_gene_variant	MODIFIER	GLYMA10G01110.2	protein_coding	-	-	-	-	-	-	-	-1	-	K7LGR8_SOYBN	UPI000294CF31	-
GLYMA10G01110	10:782578-782578	TTTTTTT	upstream_gene_variant	MODIFIER	GLYMA10G01110.2	protein_coding	-	-	-	-	-	-	-	-1	-	K7LGR8_SOYBN	UPI000294CF31	-
GLYMA10G01110	10:783753-783753	AA	upstream_gene_variant	MODIFIER	GLYMA10G01110.2	protein_coding	-	-	-	-	-	-	-	-1	-	K7LGR8_SOYBN	UPI000294CF31	-
-	10:784681-784681	T	intergenic_variant	MODIFIER	-	-	-	-	-	-	-	-	-	-	-	-	-	-
-	10:786317-786317	T	intergenic_variant	MODIFIER	-	-	-	-	-	-	-	-	-	-	-	-	-	-
-	10:786602-786602	TT	intergenic_variant	MODIFIER	-	-	-	-	-	-	-	-	-	-	-	-	-	-
GLYMA10G01120	10:792775-792775	CTCTC	5_prime_UTR_variant	MODIFIER	GLYMA10G01120.1	protein_coding	GLYMA10G01120.1:c.-580_-579insCTCTC	-	219-220	-	-	-	-	1	-	I1L7J7_SOYBN	UPI000233C372	-
GLYMA10G01120	10:796751-796752	-	downstream_gene_variant	MODIFIER	GLYMA10G01120.1	protein_coding	-	-	-	-	-	-	-	1	-	I1L7J7_SOYBN	UPI000233C372	-
GLYMA10G01131	10:796751-796752	-	upstream_gene_variant	MODIFIER	GLYMA10G01131.1	protein_coding	-	-	-	-	-	-	-	1	-	K7LGR9_SOYBN	UPI0002958C1F	-
GLYMA10G01120	10:797136-797136	TCT	downstream_gene_variant	MODIFIER	GLYMA10G01120.1	protein_coding	-	-	-	-	-	-	-	1	-	I1L7J7_SOYBN	UPI000233C372	-
GLYMA10G01131	10:797136-797136	TCT	upstream_gene_variant	MODIFIER	GLYMA10G01131.1	protein_coding	-	-	-	-	-	-	-	1	-	K7LGR9_SOYBN	UPI0002958C1F	-
GLYMA10G01120	10:799003-799003	AA	downstream_gene_variant	MODIFIER	GLYMA10G01120.1	protein_coding	-	-	-	-	-	-	-	1	-	I1L7J7_SOYBN	UPI000233C372	-
GLYMA10G01131	10:799003-799003	AA	upstream_gene_variant	MODIFIER	GLYMA10G01131.1	protein_coding	-	-	-	-	-	-	-	1	-	K7LGR9_SOYBN	UPI0002958C1F	-
GLYMA10G01131	10:800924-800924	TT	intron_variant	MODIFIER	GLYMA10G01131.1	protein_coding	GLYMA10G01131.1:c.14+1221_14+1222dupTT	-	-	-	-	-	-	1	-	K7LGR9_SOYBN	UPI0002958C1F	-
GLYMA10G01131	10:808765-808766	-	downstream_gene_variant	MODIFIER	GLYMA10G01131.1	protein_coding	-	-	-	-	-	-	-	1	-	K7LGR9_SOYBN	UPI0002958C1F	-
GLYMA10G01131	10:808767-808772	-	downstream_gene_variant	MODIFIER	GLYMA10G01131.1	protein_coding	-	-	-	-	-	-	-	1	-	K7LGR9_SOYBN	UPI0002958C1F	-
GLYMA10G01131	10:809779-809779	T	downstream_gene_variant	MODIFIER	GLYMA10G01131.1	protein_coding	-	-	-	-	-	-	-	1	-	K7LGR9_SOYBN	UPI0002958C1F	-
GLYMA10G01131	10:812699-812699	TAA	downstream_gene_variant	MODIFIER	GLYMA10G01131.1	protein_coding	-	-	-	-	-	-	-	1	-	K7LGR9_SOYBN	UPI0002958C1F	-
GLYMA10G01140	10:816391-816391	ATGAATATAA	upstream_gene_variant	MODIFIER	GLYMA10G01140.1	protein_coding	-	-	-	-	-	-	-	1	-	I1L7J9_SOYBN	UPI00023C8BCB	-
GLYMA10G01140	10:817780-817780	AAGA	upstream_gene_variant	MODIFIER	GLYMA10G01140.1	protein_coding	-	-	-	-	-	-	-	1	-	I1L7J9_SOYBN	UPI00023C8BCB	-
GLYMA10G01140	10:821157-821157	A	downstream_gene_variant	MODIFIER	GLYMA10G01140.1	protein_coding	-	-	-	-	-	-	-	1	-	I1L7J9_SOYBN	UPI00023C8BCB	-
GLYMA10G01140	10:821167-821168	-	downstream_gene_variant	MODIFIER	GLYMA10G01140.1	protein_coding	-	-	-	-	-	-	-	1	-	I1L7J9_SOYBN	UPI00023C8BCB	-
GLYMA10G01140	10:821330-821330	TTTTT	downstream_gene_variant	MODIFIER	GLYMA10G01140.1	protein_coding	-	-	-	-	-	-	-	1	-	I1L7J9_SOYBN	UPI00023C8BCB	-
GLYMA10G01140	10:822950-822950	A	downstream_gene_variant	MODIFIER	GLYMA10G01140.1	protein_coding	-	-	-	-	-	-	-	1	-	I1L7J9_SOYBN	UPI00023C8BCB	-
GLYMA10G01140	10:824095-824095	TA	downstream_gene_variant	MODIFIER	GLYMA10G01140.1	protein_coding	-	-	-	-	-	-	-	1	-	I1L7J9_SOYBN	UPI00023C8BCB	-
GLYMA10G01140	10:824880-824880	A	downstream_gene_variant	MODIFIER	GLYMA10G01140.1	protein_coding	-	-	-	-	-	-	-	1	-	I1L7J9_SOYBN	UPI00023C8BCB	-
-	10:825422-825422	AACCAT	intergenic_variant	MODIFIER	-	-	-	-	-	-	-	-	-	-	-	-	-	-
-	10:825966-825970	-	intergenic_variant	MODIFIER	-	-	-	-	-	-	-	-	-	-	-	-	-	-
-	10:826769-826769	T	intergenic_variant	MODIFIER	-	-	-	-	-	-	-	-	-	-	-	-	-	-
-	10:826770-826770	TATATATATATAG	intergenic_variant	MODIFIER	-	-	-	-	-	-	-	-	-	-	-	-	-	-
-	10:829822-829822	A	intergenic_variant	MODIFIER	-	-	-	-	-	-	-	-	-	-	-	-	-	-
-	10:830840-830840	T	intergenic_variant	MODIFIER	-	-	-	-	-	-	-	-	-	-	-	-	-	-
GLYMA10G01150	10:833256-833256	A	downstream_gene_variant	MODIFIER	GLYMA10G01150.2	protein_coding	-	-	-	-	-	-	-	-1	-	K7LGS0_SOYBN	UPI000295E7BA	-
GLYMA10G01150	10:834273-834273	G	downstream_gene_variant	MODIFIER	GLYMA10G01150.2	protein_coding	-	-	-	-	-	-	-	-1	-	K7LGS0_SOYBN	UPI000295E7BA	-
GLYMA10G01150	10:834274-834274	AAAG	downstream_gene_variant	MODIFIER	GLYMA10G01150.2	protein_coding	-	-	-	-	-	-	-	-1	-	K7LGS0_SOYBN	UPI000295E7BA	-
-	10:844796-844796	TCATTTTTT	intergenic_variant	MODIFIER	-	-	-	-	-	-	-	-	-	-	-	-	-	-
-	10:844946-844946	TCTGTTGATAC	intergenic_variant	MODIFIER	-	-	-	-	-	-	-	-	-	-	-	-	-	-
-	10:845979-845979	C	intergenic_variant	MODIFIER	-	-	-	-	-	-	-	-	-	-	-	-	-	-
-	10:847290-847290	T	intergenic_variant	MODIFIER	-	-	-	-	-	-	-	-	-	-	-	-	-	-
-	10:847359-847359	AT	intergenic_variant	MODIFIER	-	-	-	-	-	-	-	-	-	-	-	-	-	-
-	10:847576-847576	A	intergenic_variant	MODIFIER	-	-	-	-	-	-	-	-	-	-	-	-	-	-
-	10:847762-847762	CA	intergenic_variant	MODIFIER	-	-	-	-	-	-	-	-	-	-	-	-	-	-
GLYMA10G01170	10:872220-872220	T	upstream_gene_variant	MODIFIER	GLYMA10G01170.1	protein_coding	-	-	-	-	-	-	-	-1	-	I1L7K3_SOYBN	UPI000233C377	-
GLYMA10G01176	10:872220-872220	T	downstream_gene_variant	MODIFIER	GLYMA10G01176.1	protein_coding	-	-	-	-	-	-	-	1	-	K7LGS3_SOYBN	UPI0002969108	-
GLYMA10G01180	10:875590-875593	-	downstream_gene_variant	MODIFIER	GLYMA10G01180.1	protein_coding	-	-	-	-	-	-	-	-1	-	I1L7K4_SOYBN	UPI000233C378	-
GLYMA10G01180	10:877149-877149	GA	downstream_gene_variant	MODIFIER	GLYMA10G01180.1	protein_coding	-	-	-	-	-	-	-	-1	-	I1L7K4_SOYBN	UPI000233C378	-
GLYMA10G01190	10:877149-877149	GA	upstream_gene_variant	MODIFIER	GLYMA10G01190.1	protein_coding	-	-	-	-	-	-	-	1	-	K7LGS4_SOYBN	UPI0002962E45	-
GLYMA10G01200	10:877149-877149	GA	downstream_gene_variant	MODIFIER	GLYMA10G01200.1	protein_coding	-	-	-	-	-	-	-	-1	-	C6TDV2_SOYBN	UPI0001B06CF2	-
GLYMA10G01180	10:880471-880471	A	5_prime_UTR_variant	MODIFIER	GLYMA10G01180.1	protein_coding	GLYMA10G01180.1:c.-14_-13insT	-	121-122	-	-	-	-	-1	-	I1L7K4_SOYBN	UPI000233C378	-
GLYMA10G01190	10:880471-880471	A	upstream_gene_variant	MODIFIER	GLYMA10G01190.1	protein_coding	-	-	-	-	-	-	-	1	-	K7LGS4_SOYBN	UPI0002962E45	-
GLYMA10G01200	10:880471-880471	A	downstream_gene_variant	MODIFIER	GLYMA10G01200.1	protein_coding	-	-	-	-	-	-	-	-1	-	C6TDV2_SOYBN	UPI0001B06CF2	-
GLYMA10G01200	10:880471-880471	A	downstream_gene_variant	MODIFIER	GLYMA10G01200.2	protein_coding	-	-	-	-	-	-	-	-1	-	C6TDV2_SOYBN	UPI0001B06CF2	-
GLYMA10G01180	10:880546-880548	-	5_prime_UTR_variant	MODIFIER	GLYMA10G01180.1	protein_coding	GLYMA10G01180.1:c.-90_-89delTA	-	45-46	-	-	-	-	-1	-	I1L7K4_SOYBN	UPI000233C378	-
GLYMA10G01190	10:880546-880548	-	upstream_gene_variant	MODIFIER	GLYMA10G01190.1	protein_coding	-	-	-	-	-	-	-	1	-	K7LGS4_SOYBN	UPI0002962E45	-
GLYMA10G01200	10:880546-880548	-	downstream_gene_variant	MODIFIER	GLYMA10G01200.1	protein_coding	-	-	-	-	-	-	-	-1	-	C6TDV2_SOYBN	UPI0001B06CF2	-
GLYMA10G01200	10:880546-880548	-	downstream_gene_variant	MODIFIER	GLYMA10G01200.2	protein_coding	-	-	-	-	-	-	-	-1	-	C6TDV2_SOYBN	UPI0001B06CF2	-
GLYMA10G01180	10:882315-882315	A	upstream_gene_variant	MODIFIER	GLYMA10G01180.1	protein_coding	-	-	-	-	-	-	-	-1	-	I1L7K4_SOYBN	UPI000233C378	-
GLYMA10G01190	10:882315-882315	A	downstream_gene_variant	MODIFIER	GLYMA10G01190.1	protein_coding	-	-	-	-	-	-	-	1	-	K7LGS4_SOYBN	UPI0002962E45	-
GLYMA10G01200	10:882315-882315	A	3_prime_UTR_variant	MODIFIER	GLYMA10G01200.1	protein_coding	GLYMA10G01200.1:c.*380dupT	-	1808-1809	-	-	-	-	-1	-	C6TDV2_SOYBN	UPI0001B06CF2	-
GLYMA10G01200	10:882315-882315	A	3_prime_UTR_variant	MODIFIER	GLYMA10G01200.2	protein_coding	GLYMA10G01200.2:c.*380dupT	-	1756-1757	-	-	-	-	-1	-	C6TDV2_SOYBN	UPI0001B06CF2	-
GLYMA10G01180	10:882489-882489	AA	upstream_gene_variant	MODIFIER	GLYMA10G01180.1	protein_coding	-	-	-	-	-	-	-	-1	-	I1L7K4_SOYBN	UPI000233C378	-
GLYMA10G01190	10:882489-882489	AA	downstream_gene_variant	MODIFIER	GLYMA10G01190.1	protein_coding	-	-	-	-	-	-	-	1	-	K7LGS4_SOYBN	UPI0002962E45	-
GLYMA10G01200	10:882489-882489	AA	3_prime_UTR_variant	MODIFIER	GLYMA10G01200.1	protein_coding	GLYMA10G01200.1:c.*205_*206dupTT	-	1634-1635	-	-	-	-	-1	-	C6TDV2_SOYBN	UPI0001B06CF2	-
GLYMA10G01200	10:882489-882489	AA	3_prime_UTR_variant	MODIFIER	GLYMA10G01200.2	protein_coding	GLYMA10G01200.2:c.*205_*206dupTT	-	1582-1583	-	-	-	-	-1	-	C6TDV2_SOYBN	UPI0001B06CF2	-
GLYMA10G01180	10:883240-883240	AA	upstream_gene_variant	MODIFIER	GLYMA10G01180.1	protein_coding	-	-	-	-	-	-	-	-1	-	I1L7K4_SOYBN	UPI000233C378	-
GLYMA10G01190	10:883240-883240	AA	downstream_gene_variant	MODIFIER	GLYMA10G01190.1	protein_coding	-	-	-	-	-	-	-	1	-	K7LGS4_SOYBN	UPI0002962E45	-
GLYMA10G01200	10:883240-883240	AA	intron_variant	MODIFIER	GLYMA10G01200.1	protein_coding	GLYMA10G01200.1:c.957+29_957+30dupTT	-	-	-	-	-	-	-1	-	C6TDV2_SOYBN	UPI0001B06CF2	-
GLYMA10G01200	10:883240-883240	AA	intron_variant	MODIFIER	GLYMA10G01200.2	protein_coding	GLYMA10G01200.2:c.957+29_957+30dupTT	-	-	-	-	-	-	-1	-	C6TDV2_SOYBN	UPI0001B06CF2	-
GLYMA10G01180	10:885525-885525	AT	upstream_gene_variant	MODIFIER	GLYMA10G01180.1	protein_coding	-	-	-	-	-	-	-	-1	-	I1L7K4_SOYBN	UPI000233C378	-
GLYMA10G01190	10:885525-885525	AT	downstream_gene_variant	MODIFIER	GLYMA10G01190.1	protein_coding	-	-	-	-	-	-	-	1	-	K7LGS4_SOYBN	UPI0002962E45	-
GLYMA10G01200	10:885525-885525	AT	intron_variant	MODIFIER	GLYMA10G01200.1	protein_coding	GLYMA10G01200.1:c.-13+381_-13+382insAT	-	-	-	-	-	-	-1	-	C6TDV2_SOYBN	UPI0001B06CF2	-
GLYMA10G01200	10:885525-885525	AT	intron_variant	MODIFIER	GLYMA10G01200.2	protein_coding	GLYMA10G01200.2:c.-13+35_-13+36insAT	-	-	-	-	-	-	-1	-	C6TDV2_SOYBN	UPI0001B06CF2	-
GLYMA10G01200	10:888507-888507	T	upstream_gene_variant	MODIFIER	GLYMA10G01200.1	protein_coding	-	-	-	-	-	-	-	-1	-	C6TDV2_SOYBN	UPI0001B06CF2	-
GLYMA10G01200	10:888507-888507	T	upstream_gene_variant	MODIFIER	GLYMA10G01200.2	protein_coding	-	-	-	-	-	-	-	-1	-	C6TDV2_SOYBN	UPI0001B06CF2	-
GLYMA10G01211	10:888507-888507	T	upstream_gene_variant	MODIFIER	GLYMA10G01211.1	protein_coding	-	-	-	-	-	-	-	1	-	K7LGS5_SOYBN	UPI00023C8BD5	-
GLYMA10G01211	10:891238-891242	-	upstream_gene_variant	MODIFIER	GLYMA10G01211.1	protein_coding	-	-	-	-	-	-	-	1	-	K7LGS5_SOYBN	UPI00023C8BD5	-
GLYMA10G01211	10:891386-891386	AAG	upstream_gene_variant	MODIFIER	GLYMA10G01211.1	protein_coding	-	-	-	-	-	-	-	1	-	K7LGS5_SOYBN	UPI00023C8BD5	-
GLYMA10G01211	10:892667-892667	G	upstream_gene_variant	MODIFIER	GLYMA10G01211.1	protein_coding	-	-	-	-	-	-	-	1	-	K7LGS5_SOYBN	UPI00023C8BD5	-
GLYMA10G01211	10:900032-900039	-	downstream_gene_variant	MODIFIER	GLYMA10G01211.1	protein_coding	-	-	-	-	-	-	-	1	-	K7LGS5_SOYBN	UPI00023C8BD5	-
GLYMA10G01220	10:900032-900039	-	upstream_gene_variant	MODIFIER	GLYMA10G01220.1	protein_coding	-	-	-	-	-	-	-	1	-	C6T418_SOYBN	UPI0001B15721	-
GLYMA10G01230	10:900032-900039	-	upstream_gene_variant	MODIFIER	GLYMA10G01230.1	protein_coding	-	-	-	-	-	-	-	1	-	I1L7K9_SOYBN	UPI000233D66E	-
GLYMA10G01220	10:905732-905732	A	downstream_gene_variant	MODIFIER	GLYMA10G01220.1	protein_coding	-	-	-	-	-	-	-	1	-	C6T418_SOYBN	UPI0001B15721	-
GLYMA10G01230	10:905732-905732	A	downstream_gene_variant	MODIFIER	GLYMA10G01230.1	protein_coding	-	-	-	-	-	-	-	1	-	I1L7K9_SOYBN	UPI000233D66E	-
GLYMA10G01241	10:905732-905732	A	upstream_gene_variant	MODIFIER	GLYMA10G01241.1	protein_coding	-	-	-	-	-	-	-	1	-	K7LGS6_SOYBN	UPI000295A0FA	-
GLYMA10G01241	10:905732-905732	A	upstream_gene_variant	MODIFIER	GLYMA10G01241.2	protein_coding	-	-	-	-	-	-	-	1	-	K7LGS7_SOYBN	UPI000294ADFB	-
GLYMA10G01220	10:906416-906416	C	downstream_gene_variant	MODIFIER	GLYMA10G01220.1	protein_coding	-	-	-	-	-	-	-	1	-	C6T418_SOYBN	UPI0001B15721	-
GLYMA10G01230	10:906416-906416	C	downstream_gene_variant	MODIFIER	GLYMA10G01230.1	protein_coding	-	-	-	-	-	-	-	1	-	I1L7K9_SOYBN	UPI000233D66E	-
GLYMA10G01241	10:906416-906416	C	upstream_gene_variant	MODIFIER	GLYMA10G01241.1	protein_coding	-	-	-	-	-	-	-	1	-	K7LGS6_SOYBN	UPI000295A0FA	-
GLYMA10G01241	10:906416-906416	C	upstream_gene_variant	MODIFIER	GLYMA10G01241.2	protein_coding	-	-	-	-	-	-	-	1	-	K7LGS7_SOYBN	UPI000294ADFB	-
GLYMA10G01230	10:907668-907669	-	downstream_gene_variant	MODIFIER	GLYMA10G01230.1	protein_coding	-	-	-	-	-	-	-	1	-	I1L7K9_SOYBN	UPI000233D66E	-
GLYMA10G01241	10:907668-907669	-	intron_variant	MODIFIER	GLYMA10G01241.1	protein_coding	GLYMA10G01241.1:c.365+553delG	-	-	-	-	-	-	1	-	K7LGS6_SOYBN	UPI000295A0FA	-
GLYMA10G01241	10:907668-907669	-	upstream_gene_variant	MODIFIER	GLYMA10G01241.2	protein_coding	-	-	-	-	-	-	-	1	-	K7LGS7_SOYBN	UPI000294ADFB	-
GLYMA10G01230	10:907675-907679	-	downstream_gene_variant	MODIFIER	GLYMA10G01230.1	protein_coding	-	-	-	-	-	-	-	1	-	I1L7K9_SOYBN	UPI000233D66E	-
GLYMA10G01241	10:907675-907679	-	intron_variant	MODIFIER	GLYMA10G01241.1	protein_coding	GLYMA10G01241.1:c.365+565_365+568delAAGA	-	-	-	-	-	-	1	-	K7LGS6_SOYBN	UPI000295A0FA	-
GLYMA10G01241	10:907675-907679	-	upstream_gene_variant	MODIFIER	GLYMA10G01241.2	protein_coding	-	-	-	-	-	-	-	1	-	K7LGS7_SOYBN	UPI000294ADFB	-
GLYMA10G01241	10:910780-910781	-	intron_variant	MODIFIER	GLYMA10G01241.1	protein_coding	GLYMA10G01241.1:c.366-156delG	-	-	-	-	-	-	1	-	K7LGS6_SOYBN	UPI000295A0FA	-
GLYMA10G01241	10:910780-910781	-	intron_variant	MODIFIER	GLYMA10G01241.2	protein_coding	GLYMA10G01241.2:c.281+121delG	-	-	-	-	-	-	1	-	K7LGS7_SOYBN	UPI000294ADFB	-
GLYMA10G01250	10:910780-910781	-	downstream_gene_variant	MODIFIER	GLYMA10G01250.1	protein_coding	-	-	-	-	-	-	-	-1	-	I1L7K9_SOYBN	UPI000233D66E	-
GLYMA10G01241	10:911816-911816	TCT	intron_variant	MODIFIER	GLYMA10G01241.1	protein_coding	GLYMA10G01241.1:c.631-73_631-71dupTTC	-	-	-	-	-	-	1	-	K7LGS6_SOYBN	UPI000295A0FA	-
GLYMA10G01241	10:911816-911816	TCT	intron_variant	MODIFIER	GLYMA10G01241.2	protein_coding	GLYMA10G01241.2:c.547-73_547-71dupTTC	-	-	-	-	-	-	1	-	K7LGS7_SOYBN	UPI000294ADFB	-
GLYMA10G01250	10:911816-911816	TCT	downstream_gene_variant	MODIFIER	GLYMA10G01250.1	protein_coding	-	-	-	-	-	-	-	-1	-	I1L7K9_SOYBN	UPI000233D66E	-
GLYMA10G01260	10:911816-911816	TCT	upstream_gene_variant	MODIFIER	GLYMA10G01260.3	protein_coding	-	-	-	-	-	-	-	1	-	K7LGS8_SOYBN	UPI000295CEFD	-
GLYMA10G01260	10:911816-911816	TCT	upstream_gene_variant	MODIFIER	GLYMA10G01260.4	protein_coding	-	-	-	-	-	-	-	1	-	K7LGS8_SOYBN	UPI000295CEFD	-
GLYMA10G01260	10:911816-911816	TCT	upstream_gene_variant	MODIFIER	GLYMA10G01260.5	protein_coding	-	-	-	-	-	-	-	1	-	I1L7L2_SOYBN	UPI00023C8D61	-
GLYMA10G01260	10:911816-911816	TCT	upstream_gene_variant	MODIFIER	GLYMA10G01260.6	protein_coding	-	-	-	-	-	-	-	1	-	I1L7L2_SOYBN	UPI00023C8D61	-
GLYMA10G01260	10:922988-922988	AAA	downstream_gene_variant	MODIFIER	GLYMA10G01260.3	protein_coding	-	-	-	-	-	-	-	1	-	K7LGS8_SOYBN	UPI000295CEFD	-
GLYMA10G01260	10:922988-922988	AAA	downstream_gene_variant	MODIFIER	GLYMA10G01260.4	protein_coding	-	-	-	-	-	-	-	1	-	K7LGS8_SOYBN	UPI000295CEFD	-
GLYMA10G01260	10:922988-922988	AAA	downstream_gene_variant	MODIFIER	GLYMA10G01260.5	protein_coding	-	-	-	-	-	-	-	1	-	I1L7L2_SOYBN	UPI00023C8D61	-
GLYMA10G01260	10:922988-922988	AAA	downstream_gene_variant	MODIFIER	GLYMA10G01260.6	protein_coding	-	-	-	-	-	-	-	1	-	I1L7L2_SOYBN	UPI00023C8D61	-
GLYMA10G01270	10:922988-922988	AAA	upstream_gene_variant	MODIFIER	GLYMA10G01270.1	protein_coding	-	-	-	-	-	-	-	-1	-	I1L7L4_SOYBN	UPI000233D7CB	-
GLYMA10G01270	10:922988-922988	AAA	upstream_gene_variant	MODIFIER	GLYMA10G01270.2	protein_coding	-	-	-	-	-	-	-	-1	-	I1L7L5_SOYBN	UPI00023C8D63	-
GLYMA10G01270	10:922988-922988	AAA	upstream_gene_variant	MODIFIER	GLYMA10G01270.3	protein_coding	-	-	-	-	-	-	-	-1	-	I1L7L6_SOYBN	UPI00023C8D64	-
GLYMA10G01270	10:926429-926429	TT	upstream_gene_variant	MODIFIER	GLYMA10G01270.1	protein_coding	-	-	-	-	-	-	-	-1	-	I1L7L4_SOYBN	UPI000233D7CB	-
GLYMA10G01270	10:926429-926429	TT	upstream_gene_variant	MODIFIER	GLYMA10G01270.2	protein_coding	-	-	-	-	-	-	-	-1	-	I1L7L5_SOYBN	UPI00023C8D63	-
GLYMA10G01270	10:926429-926429	TT	upstream_gene_variant	MODIFIER	GLYMA10G01270.3	protein_coding	-	-	-	-	-	-	-	-1	-	I1L7L6_SOYBN	UPI00023C8D64	-
GLYMA10G01280	10:926429-926429	TT	upstream_gene_variant	MODIFIER	GLYMA10G01280.2	protein_coding	-	-	-	-	-	-	-	1	-	I1L7L8_SOYBN	UPI00023C8D65	-
GLYMA10G01280	10:926429-926429	TT	upstream_gene_variant	MODIFIER	GLYMA10G01280.3	protein_coding	-	-	-	-	-	-	-	1	-	K7LGT3_SOYBN	UPI000233D7C7	-
GLYMA10G01280	10:926429-926429	TT	upstream_gene_variant	MODIFIER	GLYMA10G01280.4	protein_coding	-	-	-	-	-	-	-	1	-	K7LGT3_SOYBN	UPI000233D7C7	-
GLYMA10G01280	10:929959-929959	AG	upstream_gene_variant	MODIFIER	GLYMA10G01280.2	protein_coding	-	-	-	-	-	-	-	1	-	I1L7L8_SOYBN	UPI00023C8D65	-
GLYMA10G01280	10:929959-929959	AG	upstream_gene_variant	MODIFIER	GLYMA10G01280.3	protein_coding	-	-	-	-	-	-	-	1	-	K7LGT3_SOYBN	UPI000233D7C7	-
GLYMA10G01280	10:929959-929959	AG	5_prime_UTR_variant	MODIFIER	GLYMA10G01280.4	protein_coding	GLYMA10G01280.4:c.-329_-328dupAG	-	12-Nov	-	-	-	-	1	-	K7LGT3_SOYBN	UPI000233D7C7	-
GLYMA10G01280	10:934822-934822	GATTAAAATAAA	downstream_gene_variant	MODIFIER	GLYMA10G01280.2	protein_coding	-	-	-	-	-	-	-	1	-	I1L7L8_SOYBN	UPI00023C8D65	-
GLYMA10G01280	10:934822-934822	GATTAAAATAAA	downstream_gene_variant	MODIFIER	GLYMA10G01280.3	protein_coding	-	-	-	-	-	-	-	1	-	K7LGT3_SOYBN	UPI000233D7C7	-
GLYMA10G01280	10:934822-934822	GATTAAAATAAA	downstream_gene_variant	MODIFIER	GLYMA10G01280.4	protein_coding	-	-	-	-	-	-	-	1	-	K7LGT3_SOYBN	UPI000233D7C7	-
GLYMA10G01290	10:934822-934822	GATTAAAATAAA	upstream_gene_variant	MODIFIER	GLYMA10G01290.1	protein_coding	-	-	-	-	-	-	-	1	-	I1L7L9_SOYBN	UPI000233C37A	-
GLYMA10G01280	10:935697-935702	-	downstream_gene_variant	MODIFIER	GLYMA10G01280.2	protein_coding	-	-	-	-	-	-	-	1	-	I1L7L8_SOYBN	UPI00023C8D65	-
GLYMA10G01280	10:935697-935702	-	downstream_gene_variant	MODIFIER	GLYMA10G01280.3	protein_coding	-	-	-	-	-	-	-	1	-	K7LGT3_SOYBN	UPI000233D7C7	-
GLYMA10G01280	10:935697-935702	-	downstream_gene_variant	MODIFIER	GLYMA10G01280.4	protein_coding	-	-	-	-	-	-	-	1	-	K7LGT3_SOYBN	UPI000233D7C7	-
GLYMA10G01290	10:935697-935702	-	upstream_gene_variant	MODIFIER	GLYMA10G01290.1	protein_coding	-	-	-	-	-	-	-	1	-	I1L7L9_SOYBN	UPI000233C37A	-
GLYMA10G01280	10:936867-936867	TA	downstream_gene_variant	MODIFIER	GLYMA10G01280.2	protein_coding	-	-	-	-	-	-	-	1	-	I1L7L8_SOYBN	UPI00023C8D65	-
GLYMA10G01280	10:936867-936867	TA	downstream_gene_variant	MODIFIER	GLYMA10G01280.3	protein_coding	-	-	-	-	-	-	-	1	-	K7LGT3_SOYBN	UPI000233D7C7	-
GLYMA10G01280	10:936867-936867	TA	downstream_gene_variant	MODIFIER	GLYMA10G01280.4	protein_coding	-	-	-	-	-	-	-	1	-	K7LGT3_SOYBN	UPI000233D7C7	-
GLYMA10G01290	10:936867-936867	TA	upstream_gene_variant	MODIFIER	GLYMA10G01290.1	protein_coding	-	-	-	-	-	-	-	1	-	I1L7L9_SOYBN	UPI000233C37A	-
GLYMA10G01280	10:937064-937064	T	downstream_gene_variant	MODIFIER	GLYMA10G01280.2	protein_coding	-	-	-	-	-	-	-	1	-	I1L7L8_SOYBN	UPI00023C8D65	-
GLYMA10G01280	10:937064-937064	T	downstream_gene_variant	MODIFIER	GLYMA10G01280.3	protein_coding	-	-	-	-	-	-	-	1	-	K7LGT3_SOYBN	UPI000233D7C7	-
GLYMA10G01280	10:937064-937064	T	downstream_gene_variant	MODIFIER	GLYMA10G01280.4	protein_coding	-	-	-	-	-	-	-	1	-	K7LGT3_SOYBN	UPI000233D7C7	-
GLYMA10G01290	10:937064-937064	T	upstream_gene_variant	MODIFIER	GLYMA10G01290.1	protein_coding	-	-	-	-	-	-	-	1	-	I1L7L9_SOYBN	UPI000233C37A	-
GLYMA10G01280	10:939456-939456	CA	downstream_gene_variant	MODIFIER	GLYMA10G01280.2	protein_coding	-	-	-	-	-	-	-	1	-	I1L7L8_SOYBN	UPI00023C8D65	-
GLYMA10G01280	10:939456-939456	CA	downstream_gene_variant	MODIFIER	GLYMA10G01280.3	protein_coding	-	-	-	-	-	-	-	1	-	K7LGT3_SOYBN	UPI000233D7C7	-
GLYMA10G01280	10:939456-939456	CA	downstream_gene_variant	MODIFIER	GLYMA10G01280.4	protein_coding	-	-	-	-	-	-	-	1	-	K7LGT3_SOYBN	UPI000233D7C7	-
GLYMA10G01290	10:939456-939456	CA	5_prime_UTR_variant	MODIFIER	GLYMA10G01290.1	protein_coding	GLYMA10G01290.1:c.-184_-183dupAC	-	186-187	-	-	-	-	1	-	I1L7L9_SOYBN	UPI000233C37A	-
GLYMA10G01290	10:942876-942879	-	downstream_gene_variant	MODIFIER	GLYMA10G01290.1	protein_coding	-	-	-	-	-	-	-	1	-	I1L7L9_SOYBN	UPI000233C37A	-
GLYMA10G01290	10:943032-943034	-	downstream_gene_variant	MODIFIER	GLYMA10G01290.1	protein_coding	-	-	-	-	-	-	-	1	-	I1L7L9_SOYBN	UPI000233C37A	-
GLYMA10G01290	10:943034-943034	TTTT	downstream_gene_variant	MODIFIER	GLYMA10G01290.1	protein_coding	-	-	-	-	-	-	-	1	-	I1L7L9_SOYBN	UPI000233C37A	-
GLYMA10G01290	10:943669-943669	A	downstream_gene_variant	MODIFIER	GLYMA10G01290.1	protein_coding	-	-	-	-	-	-	-	1	-	I1L7L9_SOYBN	UPI000233C37A	-
GLYMA10G01290	10:943706-943709	-	downstream_gene_variant	MODIFIER	GLYMA10G01290.1	protein_coding	-	-	-	-	-	-	-	1	-	I1L7L9_SOYBN	UPI000233C37A	-
GLYMA10G01290	10:943761-943761	T	downstream_gene_variant	MODIFIER	GLYMA10G01290.1	protein_coding	-	-	-	-	-	-	-	1	-	I1L7L9_SOYBN	UPI000233C37A	-
GLYMA10G01290	10:943805-943806	-	downstream_gene_variant	MODIFIER	GLYMA10G01290.1	protein_coding	-	-	-	-	-	-	-	1	-	I1L7L9_SOYBN	UPI000233C37A	-
GLYMA10G01290	10:944568-944568	T	downstream_gene_variant	MODIFIER	GLYMA10G01290.1	protein_coding	-	-	-	-	-	-	-	1	-	I1L7L9_SOYBN	UPI000233C37A	-
GLYMA10G01290	10:945394-945394	T	downstream_gene_variant	MODIFIER	GLYMA10G01290.1	protein_coding	-	-	-	-	-	-	-	1	-	I1L7L9_SOYBN	UPI000233C37A	-
GLYMA10G01290	10:945981-945981	AA	downstream_gene_variant	MODIFIER	GLYMA10G01290.1	protein_coding	-	-	-	-	-	-	-	1	-	I1L7L9_SOYBN	UPI000233C37A	-
GLYMA10G01290	10:946274-946274	AT	downstream_gene_variant	MODIFIER	GLYMA10G01290.1	protein_coding	-	-	-	-	-	-	-	1	-	I1L7L9_SOYBN	UPI000233C37A	-
-	10:947208-947208	A	intergenic_variant	MODIFIER	-	-	-	-	-	-	-	-	-	-	-	-	-	-
-	10:947638-947638	A	intergenic_variant	MODIFIER	-	-	-	-	-	-	-	-	-	-	-	-	-	-
-	10:952323-952323	A	intergenic_variant	MODIFIER	-	-	-	-	-	-	-	-	-	-	-	-	-	-
-	10:952339-952339	A	intergenic_variant	MODIFIER	-	-	-	-	-	-	-	-	-	-	-	-	-	-
-	10:952543-952544	-	intergenic_variant	MODIFIER	-	-	-	-	-	-	-	-	-	-	-	-	-	-
-	10:952571-952572	-	intergenic_variant	MODIFIER	-	-	-	-	-	-	-	-	-	-	-	-	-	-
-	10:952721-952721	ATATATGC	intergenic_variant	MODIFIER	-	-	-	-	-	-	-	-	-	-	-	-	-	-
-	10:953419-953419	A	intergenic_variant	MODIFIER	-	-	-	-	-	-	-	-	-	-	-	-	-	-
-	10:953426-953427	-	intergenic_variant	MODIFIER	-	-	-	-	-	-	-	-	-	-	-	-	-	-
GLYMA10G01300	10:954588-954588	T	upstream_gene_variant	MODIFIER	GLYMA10G01300.1	protein_coding	-	-	-	-	-	-	-	1	-	C6SZA2_SOYBN	UPI0001B14F3F	-
GLYMA10G01300	10:954640-954640	G	upstream_gene_variant	MODIFIER	GLYMA10G01300.1	protein_coding	-	-	-	-	-	-	-	1	-	C6SZA2_SOYBN	UPI0001B14F3F	-
GLYMA10G01300	10:954941-954941	A	upstream_gene_variant	MODIFIER	GLYMA10G01300.1	protein_coding	-	-	-	-	-	-	-	1	-	C6SZA2_SOYBN	UPI0001B14F3F	-
GLYMA10G01300	10:956129-956129	T	upstream_gene_variant	MODIFIER	GLYMA10G01300.1	protein_coding	-	-	-	-	-	-	-	1	-	C6SZA2_SOYBN	UPI0001B14F3F	-
GLYMA10G01300	10:961443-961443	TT	downstream_gene_variant	MODIFIER	GLYMA10G01300.1	protein_coding	-	-	-	-	-	-	-	1	-	C6SZA2_SOYBN	UPI0001B14F3F	-
GLYMA10G01300	10:963026-963026	AA	downstream_gene_variant	MODIFIER	GLYMA10G01300.1	protein_coding	-	-	-	-	-	-	-	1	-	C6SZA2_SOYBN	UPI0001B14F3F	-
GLYMA10G01300	10:964201-964201	A	downstream_gene_variant	MODIFIER	GLYMA10G01300.1	protein_coding	-	-	-	-	-	-	-	1	-	C6SZA2_SOYBN	UPI0001B14F3F	-
GLYMA10G01310	10:967939-967939	AC	upstream_gene_variant	MODIFIER	GLYMA10G01310.1	protein_coding	-	-	-	-	-	-	-	1	-	I1NBF7_SOYBN	UPI00005D3779	-
GLYMA10G01310	10:971591-971591	GAT	intron_variant	MODIFIER	GLYMA10G01310.1	protein_coding	GLYMA10G01310.1:c.339+48_339+49insGAT	-	-	-	-	-	-	1	-	I1NBF7_SOYBN	UPI00005D3779	-
GLYMA10G01310	10:971805-971805	CTTCCTTCCTTC	intron_variant	MODIFIER	GLYMA10G01310.1	protein_coding	GLYMA10G01310.1:c.459-48_459-37dupCTTCCTTCCTTC	-	-	-	-	-	-	1	-	I1NBF7_SOYBN	UPI00005D3779	-
GLYMA10G01310	10:974484-974484	A	downstream_gene_variant	MODIFIER	GLYMA10G01310.1	protein_coding	-	-	-	-	-	-	-	1	-	I1NBF7_SOYBN	UPI00005D3779	-
GLYMA10G01310	10:974754-974754	T	downstream_gene_variant	MODIFIER	GLYMA10G01310.1	protein_coding	-	-	-	-	-	-	-	1	-	I1NBF7_SOYBN	UPI00005D3779	-
GLYMA10G01310	10:976842-976842	C	downstream_gene_variant	MODIFIER	GLYMA10G01310.1	protein_coding	-	-	-	-	-	-	-	1	-	I1NBF7_SOYBN	UPI00005D3779	-
GLYMA10G01330	10:976842-976842	C	upstream_gene_variant	MODIFIER	GLYMA10G01330.1	protein_coding	-	-	-	-	-	-	-	1	-	I1L7M3_SOYBN	UPI0001D83F03	-
GLYMA10G01330	10:977491-977491	A	upstream_gene_variant	MODIFIER	GLYMA10G01330.1	protein_coding	-	-	-	-	-	-	-	1	-	I1L7M3_SOYBN	UPI0001D83F03	-
GLYMA10G01330	10:978261-978262	-	upstream_gene_variant	MODIFIER	GLYMA10G01330.1	protein_coding	-	-	-	-	-	-	-	1	-	I1L7M3_SOYBN	UPI0001D83F03	-
GLYMA10G01330	10:979245-979245	G	upstream_gene_variant	MODIFIER	GLYMA10G01330.1	protein_coding	-	-	-	-	-	-	-	1	-	I1L7M3_SOYBN	UPI0001D83F03	-
GLYMA10G01330	10:980710-980710	CT	intron_variant	MODIFIER	GLYMA10G01330.1	protein_coding	GLYMA10G01330.1:c.305+36_305+37dupCT	-	-	-	-	-	-	1	-	I1L7M3_SOYBN	UPI0001D83F03	-
GLYMA10G01340	10:986972-986972	A	upstream_gene_variant	MODIFIER	GLYMA10G01340.1	protein_coding	-	-	-	-	-	-	-	1	-	I1L7M4_SOYBN	UPI000233C37C	-
GLYMA10G01340	10:992209-992209	TAATTGAG	downstream_gene_variant	MODIFIER	GLYMA10G01340.1	protein_coding	-	-	-	-	-	-	-	1	-	I1L7M4_SOYBN	UPI000233C37C	-
GLYMA10G01355	10:992209-992209	TAATTGAG	upstream_gene_variant	MODIFIER	GLYMA10G01355.1	protein_coding	-	-	-	-	-	-	-	1	-	K7LGT4_SOYBN	UPI0002966B7D	-
GLYMA10G01340	10:992508-992508	T	downstream_gene_variant	MODIFIER	GLYMA10G01340.1	protein_coding	-	-	-	-	-	-	-	1	-	I1L7M4_SOYBN	UPI000233C37C	-
GLYMA10G01355	10:992508-992508	T	upstream_gene_variant	MODIFIER	GLYMA10G01355.1	protein_coding	-	-	-	-	-	-	-	1	-	K7LGT4_SOYBN	UPI0002966B7D	-
GLYMA10G01340	10:993220-993220	A	downstream_gene_variant	MODIFIER	GLYMA10G01340.1	protein_coding	-	-	-	-	-	-	-	1	-	I1L7M4_SOYBN	UPI000233C37C	-
GLYMA10G01355	10:993220-993220	A	upstream_gene_variant	MODIFIER	GLYMA10G01355.1	protein_coding	-	-	-	-	-	-	-	1	-	K7LGT4_SOYBN	UPI0002966B7D	-
GLYMA10G01355	10:994912-994912	ATATATATATATAT	upstream_gene_variant	MODIFIER	GLYMA10G01355.1	protein_coding	-	-	-	-	-	-	-	1	-	K7LGT4_SOYBN	UPI0002966B7D	-
GLYMA10G01370	10:994912-994912	ATATATATATATAT	downstream_gene_variant	MODIFIER	GLYMA10G01370.1	protein_coding	-	-	-	-	-	-	-	-1	-	I1L7M6_SOYBN	UPI00023C8D6F	-
GLYMA10G01355	10:997724-997724	A	intron_variant	MODIFIER	GLYMA10G01355.1	protein_coding	GLYMA10G01355.1:c.415-41dupA	-	-	-	-	-	-	1	-	K7LGT4_SOYBN	UPI0002966B7D	-
GLYMA10G01370	10:997724-997724	A	downstream_gene_variant	MODIFIER	GLYMA10G01370.1	protein_coding	-	-	-	-	-	-	-	-1	-	I1L7M6_SOYBN	UPI00023C8D6F	-
GLYMA10G01380	10:1008081-1008081	A	intron_variant	MODIFIER	GLYMA10G01380.1	protein_coding	GLYMA10G01380.1:c.387-1084dupT	-	-	-	-	-	-	-1	-	I1L7M7_SOYBN	UPI000233C37F	-
GLYMA10G01380	10:1011013-1011013	C	upstream_gene_variant	MODIFIER	GLYMA10G01380.1	protein_coding	-	-	-	-	-	-	-	-1	-	I1L7M7_SOYBN	UPI000233C37F	-
GLYMA10G01380	10:1011956-1011956	T	upstream_gene_variant	MODIFIER	GLYMA10G01380.1	protein_coding	-	-	-	-	-	-	-	-1	-	I1L7M7_SOYBN	UPI000233C37F	-
GLYMA10G01380	10:1012608-1012614	-	upstream_gene_variant	MODIFIER	GLYMA10G01380.1	protein_coding	-	-	-	-	-	-	-	-1	-	I1L7M7_SOYBN	UPI000233C37F	-
GLYMA10G01380	10:1014467-1014467	AAA	upstream_gene_variant	MODIFIER	GLYMA10G01380.1	protein_coding	-	-	-	-	-	-	-	-1	-	I1L7M7_SOYBN	UPI000233C37F	-
GLYMA10G01391	10:1014467-1014467	AAA	upstream_gene_variant	MODIFIER	GLYMA10G01391.1	protein_coding	-	-	-	-	-	-	-	1	-	K7LGT5_SOYBN	UPI000295A0ED	-
GLYMA10G01380	10:1014873-1014873	G	upstream_gene_variant	MODIFIER	GLYMA10G01380.1	protein_coding	-	-	-	-	-	-	-	-1	-	I1L7M7_SOYBN	UPI000233C37F	-
GLYMA10G01391	10:1014873-1014873	G	upstream_gene_variant	MODIFIER	GLYMA10G01391.1	protein_coding	-	-	-	-	-	-	-	1	-	K7LGT5_SOYBN	UPI000295A0ED	-
GLYMA10G01391	10:1015769-1015771	-	upstream_gene_variant	MODIFIER	GLYMA10G01391.1	protein_coding	-	-	-	-	-	-	-	1	-	K7LGT5_SOYBN	UPI000295A0ED	-
GLYMA10G01391	10:1020725-1020725	AAT	intron_variant	MODIFIER	GLYMA10G01391.1	protein_coding	GLYMA10G01391.1:c.246-165_246-163dupTAA	-	-	-	-	-	-	1	-	K7LGT5_SOYBN	UPI000295A0ED	-
GLYMA10G01391	10:1023030-1023030	A	downstream_gene_variant	MODIFIER	GLYMA10G01391.1	protein_coding	-	-	-	-	-	-	-	1	-	K7LGT5_SOYBN	UPI000295A0ED	-
GLYMA10G01400	10:1023030-1023030	A	upstream_gene_variant	MODIFIER	GLYMA10G01400.1	protein_coding	-	-	-	-	-	-	-	1	-	I1L7M8_SOYBN	UPI000233C1D7	-
GLYMA10G01391	10:1023885-1023885	A	downstream_gene_variant	MODIFIER	GLYMA10G01391.1	protein_coding	-	-	-	-	-	-	-	1	-	K7LGT5_SOYBN	UPI000295A0ED	-
GLYMA10G01400	10:1023885-1023885	A	upstream_gene_variant	MODIFIER	GLYMA10G01400.1	protein_coding	-	-	-	-	-	-	-	1	-	I1L7M8_SOYBN	UPI000233C1D7	-
GLYMA10G01391	10:1023938-1023938	A	downstream_gene_variant	MODIFIER	GLYMA10G01391.1	protein_coding	-	-	-	-	-	-	-	1	-	K7LGT5_SOYBN	UPI000295A0ED	-
GLYMA10G01400	10:1023938-1023938	A	upstream_gene_variant	MODIFIER	GLYMA10G01400.1	protein_coding	-	-	-	-	-	-	-	1	-	I1L7M8_SOYBN	UPI000233C1D7	-
GLYMA10G01391	10:1023957-1023957	T	downstream_gene_variant	MODIFIER	GLYMA10G01391.1	protein_coding	-	-	-	-	-	-	-	1	-	K7LGT5_SOYBN	UPI000295A0ED	-
GLYMA10G01400	10:1023957-1023957	T	upstream_gene_variant	MODIFIER	GLYMA10G01400.1	protein_coding	-	-	-	-	-	-	-	1	-	I1L7M8_SOYBN	UPI000233C1D7	-
GLYMA10G01391	10:1024545-1024545	C	downstream_gene_variant	MODIFIER	GLYMA10G01391.1	protein_coding	-	-	-	-	-	-	-	1	-	K7LGT5_SOYBN	UPI000295A0ED	-
GLYMA10G01400	10:1024545-1024545	C	upstream_gene_variant	MODIFIER	GLYMA10G01400.1	protein_coding	-	-	-	-	-	-	-	1	-	I1L7M8_SOYBN	UPI000233C1D7	-
GLYMA10G01391	10:1024689-1024689	AAA	downstream_gene_variant	MODIFIER	GLYMA10G01391.1	protein_coding	-	-	-	-	-	-	-	1	-	K7LGT5_SOYBN	UPI000295A0ED	-
GLYMA10G01400	10:1024689-1024689	AAA	upstream_gene_variant	MODIFIER	GLYMA10G01400.1	protein_coding	-	-	-	-	-	-	-	1	-	I1L7M8_SOYBN	UPI000233C1D7	-
GLYMA10G01391	10:1026003-1026003	C	downstream_gene_variant	MODIFIER	GLYMA10G01391.1	protein_coding	-	-	-	-	-	-	-	1	-	K7LGT5_SOYBN	UPI000295A0ED	-
GLYMA10G01400	10:1026003-1026003	C	upstream_gene_variant	MODIFIER	GLYMA10G01400.1	protein_coding	-	-	-	-	-	-	-	1	-	I1L7M8_SOYBN	UPI000233C1D7	-
GLYMA10G01391	10:1026035-1026058	-	downstream_gene_variant	MODIFIER	GLYMA10G01391.1	protein_coding	-	-	-	-	-	-	-	1	-	K7LGT5_SOYBN	UPI000295A0ED	-
GLYMA10G01400	10:1026035-1026058	-	upstream_gene_variant	MODIFIER	GLYMA10G01400.1	protein_coding	-	-	-	-	-	-	-	1	-	I1L7M8_SOYBN	UPI000233C1D7	-
GLYMA10G01391	10:1026154-1026155	-	downstream_gene_variant	MODIFIER	GLYMA10G01391.1	protein_coding	-	-	-	-	-	-	-	1	-	K7LGT5_SOYBN	UPI000295A0ED	-
GLYMA10G01400	10:1026154-1026155	-	upstream_gene_variant	MODIFIER	GLYMA10G01400.1	protein_coding	-	-	-	-	-	-	-	1	-	I1L7M8_SOYBN	UPI000233C1D7	-
GLYMA10G01391	10:1026180-1026192	-	downstream_gene_variant	MODIFIER	GLYMA10G01391.1	protein_coding	-	-	-	-	-	-	-	1	-	K7LGT5_SOYBN	UPI000295A0ED	-
GLYMA10G01400	10:1026180-1026192	-	upstream_gene_variant	MODIFIER	GLYMA10G01400.1	protein_coding	-	-	-	-	-	-	-	1	-	I1L7M8_SOYBN	UPI000233C1D7	-
GLYMA10G01400	10:1030189-1030189	T	intron_variant	MODIFIER	GLYMA10G01400.1	protein_coding	GLYMA10G01400.1:c.985+21_985+22insT	-	-	-	-	-	-	1	-	I1L7M8_SOYBN	UPI000233C1D7	-
GLYMA10G01400	10:1030193-1030193	AAT	intron_variant	MODIFIER	GLYMA10G01400.1	protein_coding	GLYMA10G01400.1:c.985+25_985+26insAAT	-	-	-	-	-	-	1	-	I1L7M8_SOYBN	UPI000233C1D7	-
GLYMA10G01410	10:1039288-1039288	AATT	upstream_gene_variant	MODIFIER	GLYMA10G01410.2	protein_coding	-	-	-	-	-	-	-	-1	-	K7LGT6_SOYBN	UPI000295C75F	-
GLYMA10G01410	10:1040709-1040709	TA	upstream_gene_variant	MODIFIER	GLYMA10G01410.2	protein_coding	-	-	-	-	-	-	-	-1	-	K7LGT6_SOYBN	UPI000295C75F	-
GLYMA10G01420	10:1040709-1040709	TA	downstream_gene_variant	MODIFIER	GLYMA10G01420.1	protein_coding	-	-	-	-	-	-	-	-1	-	I1L7N0_SOYBN	UPI000233C380	-
GLYMA10G01410	10:1040752-1040752	AAA	upstream_gene_variant	MODIFIER	GLYMA10G01410.2	protein_coding	-	-	-	-	-	-	-	-1	-	K7LGT6_SOYBN	UPI000295C75F	-
GLYMA10G01420	10:1040752-1040752	AAA	downstream_gene_variant	MODIFIER	GLYMA10G01420.1	protein_coding	-	-	-	-	-	-	-	-1	-	I1L7N0_SOYBN	UPI000233C380	-
GLYMA10G01410	10:1040847-1040847	T	upstream_gene_variant	MODIFIER	GLYMA10G01410.2	protein_coding	-	-	-	-	-	-	-	-1	-	K7LGT6_SOYBN	UPI000295C75F	-
GLYMA10G01420	10:1040847-1040847	T	downstream_gene_variant	MODIFIER	GLYMA10G01420.1	protein_coding	-	-	-	-	-	-	-	-1	-	I1L7N0_SOYBN	UPI000233C380	-
GLYMA10G01410	10:1041559-1041563	-	upstream_gene_variant	MODIFIER	GLYMA10G01410.2	protein_coding	-	-	-	-	-	-	-	-1	-	K7LGT6_SOYBN	UPI000295C75F	-
GLYMA10G01420	10:1041559-1041563	-	downstream_gene_variant	MODIFIER	GLYMA10G01420.1	protein_coding	-	-	-	-	-	-	-	-1	-	I1L7N0_SOYBN	UPI000233C380	-
GLYMA10G01410	10:1042397-1042397	A	upstream_gene_variant	MODIFIER	GLYMA10G01410.2	protein_coding	-	-	-	-	-	-	-	-1	-	K7LGT6_SOYBN	UPI000295C75F	-
GLYMA10G01420	10:1042397-1042397	A	downstream_gene_variant	MODIFIER	GLYMA10G01420.1	protein_coding	-	-	-	-	-	-	-	-1	-	I1L7N0_SOYBN	UPI000233C380	-
GLYMA10G01410	10:1042892-1042892	G	upstream_gene_variant	MODIFIER	GLYMA10G01410.2	protein_coding	-	-	-	-	-	-	-	-1	-	K7LGT6_SOYBN	UPI000295C75F	-
GLYMA10G01420	10:1042892-1042892	G	downstream_gene_variant	MODIFIER	GLYMA10G01420.1	protein_coding	-	-	-	-	-	-	-	-1	-	I1L7N0_SOYBN	UPI000233C380	-
GLYMA10G01420	10:1044089-1044089	TGATTAA	downstream_gene_variant	MODIFIER	GLYMA10G01420.1	protein_coding	-	-	-	-	-	-	-	-1	-	I1L7N0_SOYBN	UPI000233C380	-
GLYMA10G01420	10:1046476-1046476	A	intron_variant	MODIFIER	GLYMA10G01420.1	protein_coding	GLYMA10G01420.1:c.730-214dupT	-	-	-	-	-	-	-1	-	I1L7N0_SOYBN	UPI000233C380	-
GLYMA10G01420	10:1051557-1051562	-	upstream_gene_variant	MODIFIER	GLYMA10G01420.1	protein_coding	-	-	-	-	-	-	-	-1	-	I1L7N0_SOYBN	UPI000233C380	-
GLYMA10G01430	10:1051557-1051562	-	downstream_gene_variant	MODIFIER	GLYMA10G01430.1	protein_coding	-	-	-	-	-	-	-	-1	-	I1L7N1_SOYBN	UPI00023C8F0A	-
GLYMA10G01420	10:1051563-1051566	-	upstream_gene_variant	MODIFIER	GLYMA10G01420.1	protein_coding	-	-	-	-	-	-	-	-1	-	I1L7N0_SOYBN	UPI000233C380	-
GLYMA10G01430	10:1051563-1051566	-	downstream_gene_variant	MODIFIER	GLYMA10G01430.1	protein_coding	-	-	-	-	-	-	-	-1	-	I1L7N1_SOYBN	UPI00023C8F0A	-
GLYMA10G01420	10:1052541-1052541	T	upstream_gene_variant	MODIFIER	GLYMA10G01420.1	protein_coding	-	-	-	-	-	-	-	-1	-	I1L7N0_SOYBN	UPI000233C380	-
GLYMA10G01430	10:1052541-1052541	T	downstream_gene_variant	MODIFIER	GLYMA10G01430.1	protein_coding	-	-	-	-	-	-	-	-1	-	I1L7N1_SOYBN	UPI00023C8F0A	-
GLYMA10G01430	10:1053528-1053528	A	downstream_gene_variant	MODIFIER	GLYMA10G01430.1	protein_coding	-	-	-	-	-	-	-	-1	-	I1L7N1_SOYBN	UPI00023C8F0A	-
GLYMA10G01430	10:1059266-1059266	T	5_prime_UTR_variant	MODIFIER	GLYMA10G01430.1	protein_coding	GLYMA10G01430.1:c.-86dupA	-	172-173	-	-	-	-	-1	-	I1L7N1_SOYBN	UPI00023C8F0A	-
GLYMA10G01430	10:1059772-1059772	AATTATTCAACATTAT	upstream_gene_variant	MODIFIER	GLYMA10G01430.1	protein_coding	-	-	-	-	-	-	-	-1	-	I1L7N1_SOYBN	UPI00023C8F0A	-
GLYMA10G01430	10:1060673-1060673	AT	upstream_gene_variant	MODIFIER	GLYMA10G01430.1	protein_coding	-	-	-	-	-	-	-	-1	-	I1L7N1_SOYBN	UPI00023C8F0A	-
GLYMA10G01430	10:1063361-1063361	GTTGTTGTC	upstream_gene_variant	MODIFIER	GLYMA10G01430.1	protein_coding	-	-	-	-	-	-	-	-1	-	I1L7N1_SOYBN	UPI00023C8F0A	-
GLYMA10G01440	10:1065740-1065740	TCAAAAGTCTTGCAAAAC	upstream_gene_variant	MODIFIER	GLYMA10G01440.1	protein_coding	-	-	-	-	-	-	-	1	-	K7LGT7_SOYBN	UPI000295E61D	-
GLYMA10G01450	10:1065740-1065740	TCAAAAGTCTTGCAAAAC	downstream_gene_variant	MODIFIER	GLYMA10G01450.2	protein_coding	-	-	-	-	-	-	-	-1	-	I1L7N2_SOYBN	UPI00023C8F0D	-
GLYMA10G01440	10:1069239-1069239	TTT	upstream_gene_variant	MODIFIER	GLYMA10G01440.1	protein_coding	-	-	-	-	-	-	-	1	-	K7LGT7_SOYBN	UPI000295E61D	-
GLYMA10G01450	10:1069239-1069239	TTT	downstream_gene_variant	MODIFIER	GLYMA10G01450.1	protein_coding	-	-	-	-	-	-	-	-1	-	I1L7N2_SOYBN	UPI00023C8F0D	-
GLYMA10G01450	10:1069239-1069239	TTT	downstream_gene_variant	MODIFIER	GLYMA10G01450.2	protein_coding	-	-	-	-	-	-	-	-1	-	I1L7N2_SOYBN	UPI00023C8F0D	-
GLYMA10G01440	10:1069735-1069735	T	upstream_gene_variant	MODIFIER	GLYMA10G01440.1	protein_coding	-	-	-	-	-	-	-	1	-	K7LGT7_SOYBN	UPI000295E61D	-
GLYMA10G01450	10:1069735-1069735	T	downstream_gene_variant	MODIFIER	GLYMA10G01450.1	protein_coding	-	-	-	-	-	-	-	-1	-	I1L7N2_SOYBN	UPI00023C8F0D	-
GLYMA10G01450	10:1069735-1069735	T	downstream_gene_variant	MODIFIER	GLYMA10G01450.2	protein_coding	-	-	-	-	-	-	-	-1	-	I1L7N2_SOYBN	UPI00023C8F0D	-
GLYMA10G01440	10:1072580-1072580	TCT	downstream_gene_variant	MODIFIER	GLYMA10G01440.1	protein_coding	-	-	-	-	-	-	-	1	-	K7LGT7_SOYBN	UPI000295E61D	-
GLYMA10G01450	10:1072580-1072580	TCT	inframe_insertion	MODERATE	GLYMA10G01450.1	protein_coding	GLYMA10G01450.1:c.372_374dupAGA	GLYMA10G01450.1:p.Glu124dup	586-587	374-375	125	D/ED	gat/gaAGAt	-1	-	I1L7N2_SOYBN	UPI00023C8F0D	Low_complexity_(Seg):seg,PANTHER:PTHR31221,PANTHER:PTHR31221:SF23,PIRSF:PIRSF038130
GLYMA10G01450	10:1072580-1072580	TCT	inframe_insertion	MODERATE	GLYMA10G01450.2	protein_coding	GLYMA10G01450.2:c.372_374dupAGA	GLYMA10G01450.2:p.Glu124dup	586-587	374-375	125	D/ED	gat/gaAGAt	-1	-	I1L7N2_SOYBN	UPI00023C8F0D	Low_complexity_(Seg):seg,PANTHER:PTHR31221,PANTHER:PTHR31221:SF23,PIRSF:PIRSF038130
GLYMA10G01450	10:1077046-1077046	ATATATATATATAT	upstream_gene_variant	MODIFIER	GLYMA10G01450.1	protein_coding	-	-	-	-	-	-	-	-1	-	I1L7N2_SOYBN	UPI00023C8F0D	-
GLYMA10G01450	10:1077046-1077046	ATATATATATATAT	upstream_gene_variant	MODIFIER	GLYMA10G01450.2	protein_coding	-	-	-	-	-	-	-	-1	-	I1L7N2_SOYBN	UPI00023C8F0D	-
GLYMA10G01450	10:1077481-1077482	-	upstream_gene_variant	MODIFIER	GLYMA10G01450.1	protein_coding	-	-	-	-	-	-	-	-1	-	I1L7N2_SOYBN	UPI00023C8F0D	-
GLYMA10G01450	10:1077481-1077482	-	upstream_gene_variant	MODIFIER	GLYMA10G01450.2	protein_coding	-	-	-	-	-	-	-	-1	-	I1L7N2_SOYBN	UPI00023C8F0D	-
-	10:1078218-1078218	A	intergenic_variant	MODIFIER	-	-	-	-	-	-	-	-	-	-	-	-	-	-
-	10:1079160-1079160	T	intergenic_variant	MODIFIER	-	-	-	-	-	-	-	-	-	-	-	-	-	-
-	10:1083809-1083809	A	intergenic_variant	MODIFIER	-	-	-	-	-	-	-	-	-	-	-	-	-	-
GLYMA10G01470	10:1087307-1087307	T	upstream_gene_variant	MODIFIER	GLYMA10G01470.1	protein_coding	-	-	-	-	-	-	-	1	-	K7LGT9_SOYBN	UPI000294F067	-
GLYMA10G01470	10:1087556-1087556	T	upstream_gene_variant	MODIFIER	GLYMA10G01470.1	protein_coding	-	-	-	-	-	-	-	1	-	K7LGT9_SOYBN	UPI000294F067	-
GLYMA10G01480	10:1087556-1087556	T	upstream_gene_variant	MODIFIER	GLYMA10G01480.1	protein_coding	-	-	-	-	-	-	-	1	-	I1L7N3_SOYBN	UPI000233C1E5	-
GLYMA10G01480	10:1087556-1087556	T	upstream_gene_variant	MODIFIER	GLYMA10G01480.2	protein_coding	-	-	-	-	-	-	-	1	-	I1L7N4_SOYBN	UPI00023C8F10	-
GLYMA10G01470	10:1088089-1088089	TCACCAC	upstream_gene_variant	MODIFIER	GLYMA10G01470.1	protein_coding	-	-	-	-	-	-	-	1	-	K7LGT9_SOYBN	UPI000294F067	-
GLYMA10G01480	10:1088089-1088089	TCACCAC	upstream_gene_variant	MODIFIER	GLYMA10G01480.1	protein_coding	-	-	-	-	-	-	-	1	-	I1L7N3_SOYBN	UPI000233C1E5	-
GLYMA10G01480	10:1088089-1088089	TCACCAC	upstream_gene_variant	MODIFIER	GLYMA10G01480.2	protein_coding	-	-	-	-	-	-	-	1	-	I1L7N4_SOYBN	UPI00023C8F10	-
GLYMA10G01470	10:1089765-1089765	T	upstream_gene_variant	MODIFIER	GLYMA10G01470.1	protein_coding	-	-	-	-	-	-	-	1	-	K7LGT9_SOYBN	UPI000294F067	-
GLYMA10G01480	10:1089765-1089765	T	upstream_gene_variant	MODIFIER	GLYMA10G01480.1	protein_coding	-	-	-	-	-	-	-	1	-	I1L7N3_SOYBN	UPI000233C1E5	-
GLYMA10G01480	10:1089765-1089765	T	upstream_gene_variant	MODIFIER	GLYMA10G01480.2	protein_coding	-	-	-	-	-	-	-	1	-	I1L7N4_SOYBN	UPI00023C8F10	-
GLYMA10G01470	10:1089815-1089815	A	upstream_gene_variant	MODIFIER	GLYMA10G01470.1	protein_coding	-	-	-	-	-	-	-	1	-	K7LGT9_SOYBN	UPI000294F067	-
GLYMA10G01480	10:1089815-1089815	A	upstream_gene_variant	MODIFIER	GLYMA10G01480.1	protein_coding	-	-	-	-	-	-	-	1	-	I1L7N3_SOYBN	UPI000233C1E5	-
GLYMA10G01480	10:1089815-1089815	A	upstream_gene_variant	MODIFIER	GLYMA10G01480.2	protein_coding	-	-	-	-	-	-	-	1	-	I1L7N4_SOYBN	UPI00023C8F10	-
GLYMA10G01470	10:1090135-1090136	-	upstream_gene_variant	MODIFIER	GLYMA10G01470.1	protein_coding	-	-	-	-	-	-	-	1	-	K7LGT9_SOYBN	UPI000294F067	-
GLYMA10G01480	10:1090135-1090136	-	upstream_gene_variant	MODIFIER	GLYMA10G01480.1	protein_coding	-	-	-	-	-	-	-	1	-	I1L7N3_SOYBN	UPI000233C1E5	-
GLYMA10G01480	10:1090135-1090136	-	upstream_gene_variant	MODIFIER	GLYMA10G01480.2	protein_coding	-	-	-	-	-	-	-	1	-	I1L7N4_SOYBN	UPI00023C8F10	-
GLYMA10G01470	10:1090524-1090524	A	upstream_gene_variant	MODIFIER	GLYMA10G01470.1	protein_coding	-	-	-	-	-	-	-	1	-	K7LGT9_SOYBN	UPI000294F067	-
GLYMA10G01480	10:1090524-1090524	A	upstream_gene_variant	MODIFIER	GLYMA10G01480.1	protein_coding	-	-	-	-	-	-	-	1	-	I1L7N3_SOYBN	UPI000233C1E5	-
GLYMA10G01480	10:1090524-1090524	A	upstream_gene_variant	MODIFIER	GLYMA10G01480.2	protein_coding	-	-	-	-	-	-	-	1	-	I1L7N4_SOYBN	UPI00023C8F10	-
GLYMA10G01470	10:1090949-1090950	-	upstream_gene_variant	MODIFIER	GLYMA10G01470.1	protein_coding	-	-	-	-	-	-	-	1	-	K7LGT9_SOYBN	UPI000294F067	-
GLYMA10G01480	10:1090949-1090950	-	upstream_gene_variant	MODIFIER	GLYMA10G01480.1	protein_coding	-	-	-	-	-	-	-	1	-	I1L7N3_SOYBN	UPI000233C1E5	-
GLYMA10G01480	10:1090949-1090950	-	upstream_gene_variant	MODIFIER	GLYMA10G01480.2	protein_coding	-	-	-	-	-	-	-	1	-	I1L7N4_SOYBN	UPI00023C8F10	-
GLYMA10G01470	10:1091149-1091149	C	5_prime_UTR_variant	MODIFIER	GLYMA10G01470.1	protein_coding	GLYMA10G01470.1:c.-268dupC	-	7-Jun	-	-	-	-	1	-	K7LGT9_SOYBN	UPI000294F067	-
GLYMA10G01480	10:1091149-1091149	C	upstream_gene_variant	MODIFIER	GLYMA10G01480.1	protein_coding	-	-	-	-	-	-	-	1	-	I1L7N3_SOYBN	UPI000233C1E5	-
GLYMA10G01480	10:1091149-1091149	C	upstream_gene_variant	MODIFIER	GLYMA10G01480.2	protein_coding	-	-	-	-	-	-	-	1	-	I1L7N4_SOYBN	UPI00023C8F10	-
GLYMA10G01470	10:1092145-1092146	-	downstream_gene_variant	MODIFIER	GLYMA10G01470.1	protein_coding	-	-	-	-	-	-	-	1	-	K7LGT9_SOYBN	UPI000294F067	-
GLYMA10G01480	10:1092145-1092146	-	upstream_gene_variant	MODIFIER	GLYMA10G01480.1	protein_coding	-	-	-	-	-	-	-	1	-	I1L7N3_SOYBN	UPI000233C1E5	-
GLYMA10G01480	10:1092145-1092146	-	upstream_gene_variant	MODIFIER	GLYMA10G01480.2	protein_coding	-	-	-	-	-	-	-	1	-	I1L7N4_SOYBN	UPI00023C8F10	-
GLYMA10G01470	10:1092303-1092303	G	downstream_gene_variant	MODIFIER	GLYMA10G01470.1	protein_coding	-	-	-	-	-	-	-	1	-	K7LGT9_SOYBN	UPI000294F067	-
GLYMA10G01480	10:1092303-1092303	G	upstream_gene_variant	MODIFIER	GLYMA10G01480.1	protein_coding	-	-	-	-	-	-	-	1	-	I1L7N3_SOYBN	UPI000233C1E5	-
GLYMA10G01480	10:1092303-1092303	G	upstream_gene_variant	MODIFIER	GLYMA10G01480.2	protein_coding	-	-	-	-	-	-	-	1	-	I1L7N4_SOYBN	UPI00023C8F10	-
GLYMA10G01470	10:1092321-1092321	T	downstream_gene_variant	MODIFIER	GLYMA10G01470.1	protein_coding	-	-	-	-	-	-	-	1	-	K7LGT9_SOYBN	UPI000294F067	-
GLYMA10G01480	10:1092321-1092321	T	upstream_gene_variant	MODIFIER	GLYMA10G01480.1	protein_coding	-	-	-	-	-	-	-	1	-	I1L7N3_SOYBN	UPI000233C1E5	-
GLYMA10G01480	10:1092321-1092321	T	upstream_gene_variant	MODIFIER	GLYMA10G01480.2	protein_coding	-	-	-	-	-	-	-	1	-	I1L7N4_SOYBN	UPI00023C8F10	-
GLYMA10G01470	10:1092345-1092346	-	downstream_gene_variant	MODIFIER	GLYMA10G01470.1	protein_coding	-	-	-	-	-	-	-	1	-	K7LGT9_SOYBN	UPI000294F067	-
GLYMA10G01480	10:1092345-1092346	-	upstream_gene_variant	MODIFIER	GLYMA10G01480.1	protein_coding	-	-	-	-	-	-	-	1	-	I1L7N3_SOYBN	UPI000233C1E5	-
GLYMA10G01480	10:1092345-1092346	-	upstream_gene_variant	MODIFIER	GLYMA10G01480.2	protein_coding	-	-	-	-	-	-	-	1	-	I1L7N4_SOYBN	UPI00023C8F10	-
GLYMA10G01470	10:1093371-1093371	G	downstream_gene_variant	MODIFIER	GLYMA10G01470.1	protein_coding	-	-	-	-	-	-	-	1	-	K7LGT9_SOYBN	UPI000294F067	-
GLYMA10G01480	10:1093371-1093371	G	intron_variant	MODIFIER	GLYMA10G01480.1	protein_coding	GLYMA10G01480.1:c.320+225_320+226insG	-	-	-	-	-	-	1	-	I1L7N3_SOYBN	UPI000233C1E5	-
GLYMA10G01480	10:1093371-1093371	G	intron_variant	MODIFIER	GLYMA10G01480.2	protein_coding	GLYMA10G01480.2:c.320+225_320+226insG	-	-	-	-	-	-	1	-	I1L7N4_SOYBN	UPI00023C8F10	-
GLYMA10G01470	10:1093372-1093372	TC	downstream_gene_variant	MODIFIER	GLYMA10G01470.1	protein_coding	-	-	-	-	-	-	-	1	-	K7LGT9_SOYBN	UPI000294F067	-
GLYMA10G01480	10:1093372-1093372	TC	intron_variant	MODIFIER	GLYMA10G01480.1	protein_coding	GLYMA10G01480.1:c.320+227_320+228insCT	-	-	-	-	-	-	1	-	I1L7N3_SOYBN	UPI000233C1E5	-
GLYMA10G01480	10:1093372-1093372	TC	intron_variant	MODIFIER	GLYMA10G01480.2	protein_coding	GLYMA10G01480.2:c.320+227_320+228insCT	-	-	-	-	-	-	1	-	I1L7N4_SOYBN	UPI00023C8F10	-
GLYMA10G01470	10:1095132-1095132	G	downstream_gene_variant	MODIFIER	GLYMA10G01470.1	protein_coding	-	-	-	-	-	-	-	1	-	K7LGT9_SOYBN	UPI000294F067	-
GLYMA10G01480	10:1095132-1095132	G	intron_variant	MODIFIER	GLYMA10G01480.1	protein_coding	GLYMA10G01480.1:c.619+781dupG	-	-	-	-	-	-	1	-	I1L7N3_SOYBN	UPI000233C1E5	-
GLYMA10G01480	10:1095132-1095132	G	intron_variant	MODIFIER	GLYMA10G01480.2	protein_coding	GLYMA10G01480.2:c.619+781dupG	-	-	-	-	-	-	1	-	I1L7N4_SOYBN	UPI00023C8F10	-
GLYMA10G01470	10:1095437-1095437	GTTTA	downstream_gene_variant	MODIFIER	GLYMA10G01470.1	protein_coding	-	-	-	-	-	-	-	1	-	K7LGT9_SOYBN	UPI000294F067	-
GLYMA10G01480	10:1095437-1095437	GTTTA	intron_variant	MODIFIER	GLYMA10G01480.1	protein_coding	GLYMA10G01480.1:c.619+1086_619+1087insTTTAG	-	-	-	-	-	-	1	-	I1L7N3_SOYBN	UPI000233C1E5	-
GLYMA10G01480	10:1095437-1095437	GTTTA	intron_variant	MODIFIER	GLYMA10G01480.2	protein_coding	GLYMA10G01480.2:c.619+1086_619+1087insTTTAG	-	-	-	-	-	-	1	-	I1L7N4_SOYBN	UPI00023C8F10	-
GLYMA10G01480	10:1096936-1096936	T	intron_variant	MODIFIER	GLYMA10G01480.1	protein_coding	GLYMA10G01480.1:c.620-1682dupT	-	-	-	-	-	-	1	-	I1L7N3_SOYBN	UPI000233C1E5	-
GLYMA10G01480	10:1096936-1096936	T	intron_variant	MODIFIER	GLYMA10G01480.2	protein_coding	GLYMA10G01480.2:c.620-1682dupT	-	-	-	-	-	-	1	-	I1L7N4_SOYBN	UPI00023C8F10	-
GLYMA10G01480	10:1098180-1098180	TGACAATGATGGTTGCAATGG	intron_variant	MODIFIER	GLYMA10G01480.1	protein_coding	GLYMA10G01480.1:c.620-426_620-425insTGCAATGGTGACAATGATGGT	-	-	-	-	-	-	1	-	I1L7N3_SOYBN	UPI000233C1E5	-
GLYMA10G01480	10:1098180-1098180	TGACAATGATGGTTGCAATGG	intron_variant	MODIFIER	GLYMA10G01480.2	protein_coding	GLYMA10G01480.2:c.620-426_620-425insTGCAATGGTGACAATGATGGT	-	-	-	-	-	-	1	-	I1L7N4_SOYBN	UPI00023C8F10	-
GLYMA10G01480	10:1099016-1099017	-	intron_variant	MODIFIER	GLYMA10G01480.1	protein_coding	GLYMA10G01480.1:c.688+333delC	-	-	-	-	-	-	1	-	I1L7N3_SOYBN	UPI000233C1E5	-
GLYMA10G01480	10:1099016-1099017	-	intron_variant	MODIFIER	GLYMA10G01480.2	protein_coding	GLYMA10G01480.2:c.688+333delC	-	-	-	-	-	-	1	-	I1L7N4_SOYBN	UPI00023C8F10	-
GLYMA10G01480	10:1100205-1100206	-	intron_variant	MODIFIER	GLYMA10G01480.1	protein_coding	GLYMA10G01480.1:c.789+233delT	-	-	-	-	-	-	1	-	I1L7N3_SOYBN	UPI000233C1E5	-
GLYMA10G01480	10:1100205-1100206	-	intron_variant	MODIFIER	GLYMA10G01480.2	protein_coding	GLYMA10G01480.2:c.780+233delT	-	-	-	-	-	-	1	-	I1L7N4_SOYBN	UPI00023C8F10	-
GLYMA10G01480	10:1102955-1102955	T	downstream_gene_variant	MODIFIER	GLYMA10G01480.1	protein_coding	-	-	-	-	-	-	-	1	-	I1L7N3_SOYBN	UPI000233C1E5	-
GLYMA10G01480	10:1102955-1102955	T	downstream_gene_variant	MODIFIER	GLYMA10G01480.2	protein_coding	-	-	-	-	-	-	-	1	-	I1L7N4_SOYBN	UPI00023C8F10	-
GLYMA10G01500	10:1102955-1102955	T	downstream_gene_variant	MODIFIER	GLYMA10G01500.1	protein_coding	-	-	-	-	-	-	-	-1	-	I1L7N5_SOYBN	UPI00023C8F14	-
GLYMA10G01480	10:1103762-1103762	A	downstream_gene_variant	MODIFIER	GLYMA10G01480.1	protein_coding	-	-	-	-	-	-	-	1	-	I1L7N3_SOYBN	UPI000233C1E5	-
GLYMA10G01480	10:1103762-1103762	A	downstream_gene_variant	MODIFIER	GLYMA10G01480.2	protein_coding	-	-	-	-	-	-	-	1	-	I1L7N4_SOYBN	UPI00023C8F10	-
GLYMA10G01500	10:1103762-1103762	A	downstream_gene_variant	MODIFIER	GLYMA10G01500.1	protein_coding	-	-	-	-	-	-	-	-1	-	I1L7N5_SOYBN	UPI00023C8F14	-
GLYMA10G01510	10:1103762-1103762	A	upstream_gene_variant	MODIFIER	GLYMA10G01510.1	protein_coding	-	-	-	-	-	-	-	1	-	I1L7N6_SOYBN	UPI0002963381	-
GLYMA10G01480	10:1104747-1104747	A	downstream_gene_variant	MODIFIER	GLYMA10G01480.1	protein_coding	-	-	-	-	-	-	-	1	-	I1L7N3_SOYBN	UPI000233C1E5	-
GLYMA10G01480	10:1104747-1104747	A	downstream_gene_variant	MODIFIER	GLYMA10G01480.2	protein_coding	-	-	-	-	-	-	-	1	-	I1L7N4_SOYBN	UPI00023C8F10	-
GLYMA10G01500	10:1104747-1104747	A	downstream_gene_variant	MODIFIER	GLYMA10G01500.1	protein_coding	-	-	-	-	-	-	-	-1	-	I1L7N5_SOYBN	UPI00023C8F14	-
GLYMA10G01510	10:1104747-1104747	A	upstream_gene_variant	MODIFIER	GLYMA10G01510.1	protein_coding	-	-	-	-	-	-	-	1	-	I1L7N6_SOYBN	UPI0002963381	-
GLYMA10G01480	10:1106109-1106116	-	downstream_gene_variant	MODIFIER	GLYMA10G01480.1	protein_coding	-	-	-	-	-	-	-	1	-	I1L7N3_SOYBN	UPI000233C1E5	-
GLYMA10G01480	10:1106109-1106116	-	downstream_gene_variant	MODIFIER	GLYMA10G01480.2	protein_coding	-	-	-	-	-	-	-	1	-	I1L7N4_SOYBN	UPI00023C8F10	-
GLYMA10G01500	10:1106109-1106116	-	downstream_gene_variant	MODIFIER	GLYMA10G01500.1	protein_coding	-	-	-	-	-	-	-	-1	-	I1L7N5_SOYBN	UPI00023C8F14	-
GLYMA10G01510	10:1106109-1106116	-	upstream_gene_variant	MODIFIER	GLYMA10G01510.1	protein_coding	-	-	-	-	-	-	-	1	-	I1L7N6_SOYBN	UPI0002963381	-
GLYMA10G01500	10:1110907-1110907	AA	upstream_gene_variant	MODIFIER	GLYMA10G01500.1	protein_coding	-	-	-	-	-	-	-	-1	-	I1L7N5_SOYBN	UPI00023C8F14	-
GLYMA10G01510	10:1110907-1110907	AA	downstream_gene_variant	MODIFIER	GLYMA10G01510.1	protein_coding	-	-	-	-	-	-	-	1	-	I1L7N6_SOYBN	UPI0002963381	-
GLYMA10G01520	10:1110907-1110907	AA	upstream_gene_variant	MODIFIER	GLYMA10G01520.1	protein_coding	-	-	-	-	-	-	-	1	-	I1L7N7_SOYBN	UPI0002966263	-
GLYMA10G01500	10:1112030-1112030	G	upstream_gene_variant	MODIFIER	GLYMA10G01500.1	protein_coding	-	-	-	-	-	-	-	-1	-	I1L7N5_SOYBN	UPI00023C8F14	-
GLYMA10G01510	10:1112030-1112030	G	downstream_gene_variant	MODIFIER	GLYMA10G01510.1	protein_coding	-	-	-	-	-	-	-	1	-	I1L7N6_SOYBN	UPI0002963381	-
GLYMA10G01520	10:1112030-1112030	G	upstream_gene_variant	MODIFIER	GLYMA10G01520.1	protein_coding	-	-	-	-	-	-	-	1	-	I1L7N7_SOYBN	UPI0002966263	-
GLYMA10G01510	10:1114884-1114884	GC	downstream_gene_variant	MODIFIER	GLYMA10G01510.1	protein_coding	-	-	-	-	-	-	-	1	-	I1L7N6_SOYBN	UPI0002963381	-
GLYMA10G01520	10:1114884-1114884	GC	intron_variant	MODIFIER	GLYMA10G01520.1	protein_coding	GLYMA10G01520.1:c.742+543_742+544dupGC	-	-	-	-	-	-	1	-	I1L7N7_SOYBN	UPI0002966263	-
GLYMA10G01520	10:1123095-1123095	A	downstream_gene_variant	MODIFIER	GLYMA10G01520.1	protein_coding	-	-	-	-	-	-	-	1	-	I1L7N7_SOYBN	UPI0002966263	-
GLYMA10G01530	10:1123095-1123095	A	downstream_gene_variant	MODIFIER	GLYMA10G01530.1	protein_coding	-	-	-	-	-	-	-	1	-	I1L7N8_SOYBN	UPI00023C8F19	-
GLYMA10G01541	10:1123095-1123095	A	downstream_gene_variant	MODIFIER	GLYMA10G01541.1	protein_coding	-	-	-	-	-	-	-	-1	-	K7LGU0_SOYBN	UPI000233C382	-
GLYMA10G01520	10:1123117-1123117	TGCA	downstream_gene_variant	MODIFIER	GLYMA10G01520.1	protein_coding	-	-	-	-	-	-	-	1	-	I1L7N7_SOYBN	UPI0002966263	-
GLYMA10G01530	10:1123117-1123117	TGCA	downstream_gene_variant	MODIFIER	GLYMA10G01530.1	protein_coding	-	-	-	-	-	-	-	1	-	I1L7N8_SOYBN	UPI00023C8F19	-
GLYMA10G01541	10:1123117-1123117	TGCA	downstream_gene_variant	MODIFIER	GLYMA10G01541.1	protein_coding	-	-	-	-	-	-	-	-1	-	K7LGU0_SOYBN	UPI000233C382	-
GLYMA10G01520	10:1124430-1124430	T	downstream_gene_variant	MODIFIER	GLYMA10G01520.1	protein_coding	-	-	-	-	-	-	-	1	-	I1L7N7_SOYBN	UPI0002966263	-
GLYMA10G01530	10:1124430-1124430	T	downstream_gene_variant	MODIFIER	GLYMA10G01530.1	protein_coding	-	-	-	-	-	-	-	1	-	I1L7N8_SOYBN	UPI00023C8F19	-
GLYMA10G01541	10:1124430-1124430	T	downstream_gene_variant	MODIFIER	GLYMA10G01541.1	protein_coding	-	-	-	-	-	-	-	-1	-	K7LGU0_SOYBN	UPI000233C382	-
GLYMA10G01541	10:1133821-1133821	A	upstream_gene_variant	MODIFIER	GLYMA10G01541.1	protein_coding	-	-	-	-	-	-	-	-1	-	K7LGU0_SOYBN	UPI000233C382	-
GLYMA10G01550	10:1133821-1133821	A	intron_variant	MODIFIER	GLYMA10G01550.1	protein_coding	GLYMA10G01550.1:c.566+224_566+225insA	-	-	-	-	-	-	1	-	I1L7P0_SOYBN	UPI000233C1EC	-
GLYMA10G01541	10:1133822-1133822	TG	upstream_gene_variant	MODIFIER	GLYMA10G01541.1	protein_coding	-	-	-	-	-	-	-	-1	-	K7LGU0_SOYBN	UPI000233C382	-
GLYMA10G01550	10:1133822-1133822	TG	intron_variant	MODIFIER	GLYMA10G01550.1	protein_coding	GLYMA10G01550.1:c.566+226_566+227insGT	-	-	-	-	-	-	1	-	I1L7P0_SOYBN	UPI000233C1EC	-
GLYMA10G01541	10:1136089-1136091	-	upstream_gene_variant	MODIFIER	GLYMA10G01541.1	protein_coding	-	-	-	-	-	-	-	-1	-	K7LGU0_SOYBN	UPI000233C382	-
GLYMA10G01550	10:1136089-1136091	-	downstream_gene_variant	MODIFIER	GLYMA10G01550.1	protein_coding	-	-	-	-	-	-	-	1	-	I1L7P0_SOYBN	UPI000233C1EC	-
GLYMA10G01560	10:1136089-1136091	-	upstream_gene_variant	MODIFIER	GLYMA10G01560.1	protein_coding	-	-	-	-	-	-	-	1	-	I1L7P2_SOYBN	UPI00023C8F1D	-
GLYMA10G01550	10:1136489-1136489	TT	downstream_gene_variant	MODIFIER	GLYMA10G01550.1	protein_coding	-	-	-	-	-	-	-	1	-	I1L7P0_SOYBN	UPI000233C1EC	-
GLYMA10G01560	10:1136489-1136489	TT	upstream_gene_variant	MODIFIER	GLYMA10G01560.1	protein_coding	-	-	-	-	-	-	-	1	-	I1L7P2_SOYBN	UPI00023C8F1D	-
GLYMA10G01550	10:1136639-1136643	-	downstream_gene_variant	MODIFIER	GLYMA10G01550.1	protein_coding	-	-	-	-	-	-	-	1	-	I1L7P0_SOYBN	UPI000233C1EC	-
GLYMA10G01560	10:1136639-1136643	-	upstream_gene_variant	MODIFIER	GLYMA10G01560.1	protein_coding	-	-	-	-	-	-	-	1	-	I1L7P2_SOYBN	UPI00023C8F1D	-
GLYMA10G01550	10:1136645-1136649	-	downstream_gene_variant	MODIFIER	GLYMA10G01550.1	protein_coding	-	-	-	-	-	-	-	1	-	I1L7P0_SOYBN	UPI000233C1EC	-
GLYMA10G01560	10:1136645-1136649	-	upstream_gene_variant	MODIFIER	GLYMA10G01560.1	protein_coding	-	-	-	-	-	-	-	1	-	I1L7P2_SOYBN	UPI00023C8F1D	-
GLYMA10G01550	10:1136837-1136837	T	downstream_gene_variant	MODIFIER	GLYMA10G01550.1	protein_coding	-	-	-	-	-	-	-	1	-	I1L7P0_SOYBN	UPI000233C1EC	-
GLYMA10G01560	10:1136837-1136837	T	upstream_gene_variant	MODIFIER	GLYMA10G01560.1	protein_coding	-	-	-	-	-	-	-	1	-	I1L7P2_SOYBN	UPI00023C8F1D	-
GLYMA10G01550	10:1137024-1137024	TG	downstream_gene_variant	MODIFIER	GLYMA10G01550.1	protein_coding	-	-	-	-	-	-	-	1	-	I1L7P0_SOYBN	UPI000233C1EC	-
GLYMA10G01560	10:1137024-1137024	TG	upstream_gene_variant	MODIFIER	GLYMA10G01560.1	protein_coding	-	-	-	-	-	-	-	1	-	I1L7P2_SOYBN	UPI00023C8F1D	-
GLYMA10G01550	10:1137782-1137782	A	downstream_gene_variant	MODIFIER	GLYMA10G01550.1	protein_coding	-	-	-	-	-	-	-	1	-	I1L7P0_SOYBN	UPI000233C1EC	-
GLYMA10G01560	10:1137782-1137782	A	upstream_gene_variant	MODIFIER	GLYMA10G01560.1	protein_coding	-	-	-	-	-	-	-	1	-	I1L7P2_SOYBN	UPI00023C8F1D	-
GLYMA10G01550	10:1138896-1138896	AAAT	downstream_gene_variant	MODIFIER	GLYMA10G01550.1	protein_coding	-	-	-	-	-	-	-	1	-	I1L7P0_SOYBN	UPI000233C1EC	-
GLYMA10G01560	10:1138896-1138896	AAAT	upstream_gene_variant	MODIFIER	GLYMA10G01560.1	protein_coding	-	-	-	-	-	-	-	1	-	I1L7P2_SOYBN	UPI00023C8F1D	-
GLYMA10G01550	10:1138939-1138943	-	downstream_gene_variant	MODIFIER	GLYMA10G01550.1	protein_coding	-	-	-	-	-	-	-	1	-	I1L7P0_SOYBN	UPI000233C1EC	-
GLYMA10G01560	10:1138939-1138943	-	upstream_gene_variant	MODIFIER	GLYMA10G01560.1	protein_coding	-	-	-	-	-	-	-	1	-	I1L7P2_SOYBN	UPI00023C8F1D	-
GLYMA10G01550	10:1139212-1139212	G	downstream_gene_variant	MODIFIER	GLYMA10G01550.1	protein_coding	-	-	-	-	-	-	-	1	-	I1L7P0_SOYBN	UPI000233C1EC	-
GLYMA10G01560	10:1139212-1139212	G	upstream_gene_variant	MODIFIER	GLYMA10G01560.1	protein_coding	-	-	-	-	-	-	-	1	-	I1L7P2_SOYBN	UPI00023C8F1D	-
GLYMA10G01550	10:1139789-1139789	A	downstream_gene_variant	MODIFIER	GLYMA10G01550.1	protein_coding	-	-	-	-	-	-	-	1	-	I1L7P0_SOYBN	UPI000233C1EC	-
GLYMA10G01560	10:1139789-1139789	A	upstream_gene_variant	MODIFIER	GLYMA10G01560.1	protein_coding	-	-	-	-	-	-	-	1	-	I1L7P2_SOYBN	UPI00023C8F1D	-
GLYMA10G01571	10:1139789-1139789	A	upstream_gene_variant	MODIFIER	GLYMA10G01571.1	protein_coding	-	-	-	-	-	-	-	1	-	K7LGU1_SOYBN	UPI000296C57A	-
GLYMA10G01560	10:1142187-1142188	-	downstream_gene_variant	MODIFIER	GLYMA10G01560.1	protein_coding	-	-	-	-	-	-	-	1	-	I1L7P2_SOYBN	UPI00023C8F1D	-
GLYMA10G01571	10:1142187-1142188	-	upstream_gene_variant	MODIFIER	GLYMA10G01571.1	protein_coding	-	-	-	-	-	-	-	1	-	K7LGU1_SOYBN	UPI000296C57A	-
GLYMA10G01560	10:1142203-1142206	-	downstream_gene_variant	MODIFIER	GLYMA10G01560.1	protein_coding	-	-	-	-	-	-	-	1	-	I1L7P2_SOYBN	UPI00023C8F1D	-
GLYMA10G01571	10:1142203-1142206	-	upstream_gene_variant	MODIFIER	GLYMA10G01571.1	protein_coding	-	-	-	-	-	-	-	1	-	K7LGU1_SOYBN	UPI000296C57A	-
GLYMA10G01560	10:1143962-1143962	A	downstream_gene_variant	MODIFIER	GLYMA10G01560.1	protein_coding	-	-	-	-	-	-	-	1	-	I1L7P2_SOYBN	UPI00023C8F1D	-
GLYMA10G01571	10:1143962-1143962	A	upstream_gene_variant	MODIFIER	GLYMA10G01571.1	protein_coding	-	-	-	-	-	-	-	1	-	K7LGU1_SOYBN	UPI000296C57A	-
GLYMA10G01560	10:1145006-1145006	C	downstream_gene_variant	MODIFIER	GLYMA10G01560.1	protein_coding	-	-	-	-	-	-	-	1	-	I1L7P2_SOYBN	UPI00023C8F1D	-
GLYMA10G01571	10:1145006-1145006	C	frameshift_variant	HIGH	GLYMA10G01571.1	protein_coding	GLYMA10G01571.1:c.527_528insC	GLYMA10G01571.1:p.Met176IlefsTer4	527-528	527-528	176	M/IX	atg/atCg	1	-	K7LGU1_SOYBN	UPI000296C57A	PROSITE_profiles:PS50985,PANTHER:PTHR31636,PANTHER:PTHR31636:SF39,Pfam:PF03514
GLYMA10G01571	10:1147764-1147764	T	downstream_gene_variant	MODIFIER	GLYMA10G01571.1	protein_coding	-	-	-	-	-	-	-	1	-	K7LGU1_SOYBN	UPI000296C57A	-
GLYMA10G01580	10:1147764-1147764	T	upstream_gene_variant	MODIFIER	GLYMA10G01580.3	protein_coding	-	-	-	-	-	-	-	1	-	K7LGU2_SOYBN	UPI0002951446	-
GLYMA10G01580	10:1147764-1147764	T	upstream_gene_variant	MODIFIER	GLYMA10G01580.4	protein_coding	-	-	-	-	-	-	-	1	-	K7LGU3_SOYBN	UPI000233C340	-
GLYMA10G01580	10:1147764-1147764	T	upstream_gene_variant	MODIFIER	GLYMA10G01580.5	protein_coding	-	-	-	-	-	-	-	1	-	K7LGU4_SOYBN	UPI000294F0BE	-
GLYMA10G01571	10:1148328-1148329	-	downstream_gene_variant	MODIFIER	GLYMA10G01571.1	protein_coding	-	-	-	-	-	-	-	1	-	K7LGU1_SOYBN	UPI000296C57A	-
GLYMA10G01580	10:1148328-1148329	-	upstream_gene_variant	MODIFIER	GLYMA10G01580.3	protein_coding	-	-	-	-	-	-	-	1	-	K7LGU2_SOYBN	UPI0002951446	-
GLYMA10G01580	10:1148328-1148329	-	upstream_gene_variant	MODIFIER	GLYMA10G01580.4	protein_coding	-	-	-	-	-	-	-	1	-	K7LGU3_SOYBN	UPI000233C340	-
GLYMA10G01580	10:1148328-1148329	-	upstream_gene_variant	MODIFIER	GLYMA10G01580.5	protein_coding	-	-	-	-	-	-	-	1	-	K7LGU4_SOYBN	UPI000294F0BE	-
GLYMA10G01571	10:1148331-1148332	-	downstream_gene_variant	MODIFIER	GLYMA10G01571.1	protein_coding	-	-	-	-	-	-	-	1	-	K7LGU1_SOYBN	UPI000296C57A	-
GLYMA10G01580	10:1148331-1148332	-	upstream_gene_variant	MODIFIER	GLYMA10G01580.3	protein_coding	-	-	-	-	-	-	-	1	-	K7LGU2_SOYBN	UPI0002951446	-
GLYMA10G01580	10:1148331-1148332	-	upstream_gene_variant	MODIFIER	GLYMA10G01580.4	protein_coding	-	-	-	-	-	-	-	1	-	K7LGU3_SOYBN	UPI000233C340	-
GLYMA10G01580	10:1148331-1148332	-	upstream_gene_variant	MODIFIER	GLYMA10G01580.5	protein_coding	-	-	-	-	-	-	-	1	-	K7LGU4_SOYBN	UPI000294F0BE	-
GLYMA10G01571	10:1148629-1148629	A	downstream_gene_variant	MODIFIER	GLYMA10G01571.1	protein_coding	-	-	-	-	-	-	-	1	-	K7LGU1_SOYBN	UPI000296C57A	-
GLYMA10G01580	10:1148629-1148629	A	upstream_gene_variant	MODIFIER	GLYMA10G01580.3	protein_coding	-	-	-	-	-	-	-	1	-	K7LGU2_SOYBN	UPI0002951446	-
GLYMA10G01580	10:1148629-1148629	A	upstream_gene_variant	MODIFIER	GLYMA10G01580.4	protein_coding	-	-	-	-	-	-	-	1	-	K7LGU3_SOYBN	UPI000233C340	-
GLYMA10G01580	10:1148629-1148629	A	upstream_gene_variant	MODIFIER	GLYMA10G01580.5	protein_coding	-	-	-	-	-	-	-	1	-	K7LGU4_SOYBN	UPI000294F0BE	-
GLYMA10G01571	10:1148684-1148692	-	downstream_gene_variant	MODIFIER	GLYMA10G01571.1	protein_coding	-	-	-	-	-	-	-	1	-	K7LGU1_SOYBN	UPI000296C57A	-
GLYMA10G01580	10:1148684-1148692	-	upstream_gene_variant	MODIFIER	GLYMA10G01580.3	protein_coding	-	-	-	-	-	-	-	1	-	K7LGU2_SOYBN	UPI0002951446	-
GLYMA10G01580	10:1148684-1148692	-	upstream_gene_variant	MODIFIER	GLYMA10G01580.4	protein_coding	-	-	-	-	-	-	-	1	-	K7LGU3_SOYBN	UPI000233C340	-
GLYMA10G01580	10:1148684-1148692	-	upstream_gene_variant	MODIFIER	GLYMA10G01580.5	protein_coding	-	-	-	-	-	-	-	1	-	K7LGU4_SOYBN	UPI000294F0BE	-
GLYMA10G01571	10:1148824-1148824	A	downstream_gene_variant	MODIFIER	GLYMA10G01571.1	protein_coding	-	-	-	-	-	-	-	1	-	K7LGU1_SOYBN	UPI000296C57A	-
GLYMA10G01580	10:1148824-1148824	A	upstream_gene_variant	MODIFIER	GLYMA10G01580.3	protein_coding	-	-	-	-	-	-	-	1	-	K7LGU2_SOYBN	UPI0002951446	-
GLYMA10G01580	10:1148824-1148824	A	upstream_gene_variant	MODIFIER	GLYMA10G01580.4	protein_coding	-	-	-	-	-	-	-	1	-	K7LGU3_SOYBN	UPI000233C340	-
GLYMA10G01580	10:1148824-1148824	A	upstream_gene_variant	MODIFIER	GLYMA10G01580.5	protein_coding	-	-	-	-	-	-	-	1	-	K7LGU4_SOYBN	UPI000294F0BE	-
GLYMA10G01571	10:1149527-1149527	A	downstream_gene_variant	MODIFIER	GLYMA10G01571.1	protein_coding	-	-	-	-	-	-	-	1	-	K7LGU1_SOYBN	UPI000296C57A	-
GLYMA10G01580	10:1149527-1149527	A	upstream_gene_variant	MODIFIER	GLYMA10G01580.3	protein_coding	-	-	-	-	-	-	-	1	-	K7LGU2_SOYBN	UPI0002951446	-
GLYMA10G01580	10:1149527-1149527	A	upstream_gene_variant	MODIFIER	GLYMA10G01580.4	protein_coding	-	-	-	-	-	-	-	1	-	K7LGU3_SOYBN	UPI000233C340	-
GLYMA10G01580	10:1149527-1149527	A	upstream_gene_variant	MODIFIER	GLYMA10G01580.5	protein_coding	-	-	-	-	-	-	-	1	-	K7LGU4_SOYBN	UPI000294F0BE	-
GLYMA10G01571	10:1149969-1149969	T	downstream_gene_variant	MODIFIER	GLYMA10G01571.1	protein_coding	-	-	-	-	-	-	-	1	-	K7LGU1_SOYBN	UPI000296C57A	-
GLYMA10G01580	10:1149969-1149969	T	upstream_gene_variant	MODIFIER	GLYMA10G01580.3	protein_coding	-	-	-	-	-	-	-	1	-	K7LGU2_SOYBN	UPI0002951446	-
GLYMA10G01580	10:1149969-1149969	T	upstream_gene_variant	MODIFIER	GLYMA10G01580.4	protein_coding	-	-	-	-	-	-	-	1	-	K7LGU3_SOYBN	UPI000233C340	-
GLYMA10G01580	10:1149969-1149969	T	upstream_gene_variant	MODIFIER	GLYMA10G01580.5	protein_coding	-	-	-	-	-	-	-	1	-	K7LGU4_SOYBN	UPI000294F0BE	-
GLYMA10G01580	10:1152955-1152956	-	intron_variant	MODIFIER	GLYMA10G01580.3	protein_coding	GLYMA10G01580.3:c.936+264delA	-	-	-	-	-	-	1	-	K7LGU2_SOYBN	UPI0002951446	-
GLYMA10G01580	10:1152955-1152956	-	intron_variant	MODIFIER	GLYMA10G01580.4	protein_coding	GLYMA10G01580.4:c.936+264delA	-	-	-	-	-	-	1	-	K7LGU3_SOYBN	UPI000233C340	-
GLYMA10G01580	10:1152955-1152956	-	intron_variant	MODIFIER	GLYMA10G01580.5	protein_coding	GLYMA10G01580.5:c.756+264delA	-	-	-	-	-	-	1	-	K7LGU4_SOYBN	UPI000294F0BE	-
GLYMA10G01590	10:1165755-1165755	TT	upstream_gene_variant	MODIFIER	GLYMA10G01590.1	protein_coding	-	-	-	-	-	-	-	-1	-	I1L7P6_SOYBN	UPI0002949DE3	-
GLYMA10G01595	10:1165755-1165755	TT	downstream_gene_variant	MODIFIER	GLYMA10G01595.1	protein_coding	-	-	-	-	-	-	-	-1	-	K7LGU5_SOYBN	UPI00029564EB	-
GLYMA10G01600	10:1165755-1165755	TT	upstream_gene_variant	MODIFIER	GLYMA10G01600.1	protein_coding	-	-	-	-	-	-	-	1	-	I1L7P7_SOYBN	UPI000233C343	-
GLYMA10G01590	10:1168087-1168088	-	upstream_gene_variant	MODIFIER	GLYMA10G01590.1	protein_coding	-	-	-	-	-	-	-	-1	-	I1L7P6_SOYBN	UPI0002949DE3	-
GLYMA10G01595	10:1168087-1168088	-	upstream_gene_variant	MODIFIER	GLYMA10G01595.1	protein_coding	-	-	-	-	-	-	-	-1	-	K7LGU5_SOYBN	UPI00029564EB	-
GLYMA10G01600	10:1168087-1168088	-	upstream_gene_variant	MODIFIER	GLYMA10G01600.1	protein_coding	-	-	-	-	-	-	-	1	-	I1L7P7_SOYBN	UPI000233C343	-
GLYMA10G01610	10:1168087-1168088	-	upstream_gene_variant	MODIFIER	GLYMA10G01610.1	protein_coding	-	-	-	-	-	-	-	1	-	-	UPI00018C70F0	-
GLYMA10G01590	10:1168089-1168090	-	upstream_gene_variant	MODIFIER	GLYMA10G01590.1	protein_coding	-	-	-	-	-	-	-	-1	-	I1L7P6_SOYBN	UPI0002949DE3	-
GLYMA10G01595	10:1168089-1168090	-	upstream_gene_variant	MODIFIER	GLYMA10G01595.1	protein_coding	-	-	-	-	-	-	-	-1	-	K7LGU5_SOYBN	UPI00029564EB	-
GLYMA10G01600	10:1168089-1168090	-	upstream_gene_variant	MODIFIER	GLYMA10G01600.1	protein_coding	-	-	-	-	-	-	-	1	-	I1L7P7_SOYBN	UPI000233C343	-
GLYMA10G01610	10:1168089-1168090	-	upstream_gene_variant	MODIFIER	GLYMA10G01610.1	protein_coding	-	-	-	-	-	-	-	1	-	-	UPI00018C70F0	-
GLYMA10G01595	10:1170344-1170344	A	upstream_gene_variant	MODIFIER	GLYMA10G01595.1	protein_coding	-	-	-	-	-	-	-	-1	-	K7LGU5_SOYBN	UPI00029564EB	-
GLYMA10G01600	10:1170344-1170344	A	downstream_gene_variant	MODIFIER	GLYMA10G01600.1	protein_coding	-	-	-	-	-	-	-	1	-	I1L7P7_SOYBN	UPI000233C343	-
GLYMA10G01610	10:1170344-1170344	A	upstream_gene_variant	MODIFIER	GLYMA10G01610.1	protein_coding	-	-	-	-	-	-	-	1	-	-	UPI00018C70F0	-
GLYMA10G01595	10:1170356-1170367	-	upstream_gene_variant	MODIFIER	GLYMA10G01595.1	protein_coding	-	-	-	-	-	-	-	-1	-	K7LGU5_SOYBN	UPI00029564EB	-
GLYMA10G01600	10:1170356-1170367	-	downstream_gene_variant	MODIFIER	GLYMA10G01600.1	protein_coding	-	-	-	-	-	-	-	1	-	I1L7P7_SOYBN	UPI000233C343	-
GLYMA10G01610	10:1170356-1170367	-	upstream_gene_variant	MODIFIER	GLYMA10G01610.1	protein_coding	-	-	-	-	-	-	-	1	-	-	UPI00018C70F0	-
GLYMA10G01595	10:1170789-1170789	GTGG	upstream_gene_variant	MODIFIER	GLYMA10G01595.1	protein_coding	-	-	-	-	-	-	-	-1	-	K7LGU5_SOYBN	UPI00029564EB	-
GLYMA10G01600	10:1170789-1170789	GTGG	downstream_gene_variant	MODIFIER	GLYMA10G01600.1	protein_coding	-	-	-	-	-	-	-	1	-	I1L7P7_SOYBN	UPI000233C343	-
GLYMA10G01610	10:1170789-1170789	GTGG	upstream_gene_variant	MODIFIER	GLYMA10G01610.1	protein_coding	-	-	-	-	-	-	-	1	-	-	UPI00018C70F0	-
GLYMA10G01595	10:1171219-1171224	-	upstream_gene_variant	MODIFIER	GLYMA10G01595.1	protein_coding	-	-	-	-	-	-	-	-1	-	K7LGU5_SOYBN	UPI00029564EB	-
GLYMA10G01600	10:1171219-1171224	-	downstream_gene_variant	MODIFIER	GLYMA10G01600.1	protein_coding	-	-	-	-	-	-	-	1	-	I1L7P7_SOYBN	UPI000233C343	-
GLYMA10G01610	10:1171219-1171224	-	upstream_gene_variant	MODIFIER	GLYMA10G01610.1	protein_coding	-	-	-	-	-	-	-	1	-	-	UPI00018C70F0	-
GLYMA10G01595	10:1172035-1172035	GTTGCGCTC	upstream_gene_variant	MODIFIER	GLYMA10G01595.1	protein_coding	-	-	-	-	-	-	-	-1	-	K7LGU5_SOYBN	UPI00029564EB	-
GLYMA10G01600	10:1172035-1172035	GTTGCGCTC	downstream_gene_variant	MODIFIER	GLYMA10G01600.1	protein_coding	-	-	-	-	-	-	-	1	-	I1L7P7_SOYBN	UPI000233C343	-
GLYMA10G01610	10:1172035-1172035	GTTGCGCTC	upstream_gene_variant	MODIFIER	GLYMA10G01610.1	protein_coding	-	-	-	-	-	-	-	1	-	-	UPI00018C70F0	-
GLYMA10G01595	10:1172036-1172036	G	upstream_gene_variant	MODIFIER	GLYMA10G01595.1	protein_coding	-	-	-	-	-	-	-	-1	-	K7LGU5_SOYBN	UPI00029564EB	-
GLYMA10G01600	10:1172036-1172036	G	downstream_gene_variant	MODIFIER	GLYMA10G01600.1	protein_coding	-	-	-	-	-	-	-	1	-	I1L7P7_SOYBN	UPI000233C343	-
GLYMA10G01610	10:1172036-1172036	G	upstream_gene_variant	MODIFIER	GLYMA10G01610.1	protein_coding	-	-	-	-	-	-	-	1	-	-	UPI00018C70F0	-
GLYMA10G01600	10:1172299-1172299	A	downstream_gene_variant	MODIFIER	GLYMA10G01600.1	protein_coding	-	-	-	-	-	-	-	1	-	I1L7P7_SOYBN	UPI000233C343	-
GLYMA10G01610	10:1172299-1172299	A	upstream_gene_variant	MODIFIER	GLYMA10G01610.1	protein_coding	-	-	-	-	-	-	-	1	-	-	UPI00018C70F0	-
GLYMA10G01600	10:1172359-1172360	-	downstream_gene_variant	MODIFIER	GLYMA10G01600.1	protein_coding	-	-	-	-	-	-	-	1	-	I1L7P7_SOYBN	UPI000233C343	-
GLYMA10G01610	10:1172359-1172360	-	upstream_gene_variant	MODIFIER	GLYMA10G01610.1	protein_coding	-	-	-	-	-	-	-	1	-	-	UPI00018C70F0	-
GLYMA10G01600	10:1172768-1172768	ACAGG	downstream_gene_variant	MODIFIER	GLYMA10G01600.1	protein_coding	-	-	-	-	-	-	-	1	-	I1L7P7_SOYBN	UPI000233C343	-
GLYMA10G01610	10:1172768-1172768	ACAGG	upstream_gene_variant	MODIFIER	GLYMA10G01610.1	protein_coding	-	-	-	-	-	-	-	1	-	-	UPI00018C70F0	-
GLYMA10G01600	10:1174691-1174691	GAA	downstream_gene_variant	MODIFIER	GLYMA10G01600.1	protein_coding	-	-	-	-	-	-	-	1	-	I1L7P7_SOYBN	UPI000233C343	-
GLYMA10G01610	10:1174691-1174691	GAA	3_prime_UTR_variant	MODIFIER	GLYMA10G01610.1	protein_coding	GLYMA10G01610.1:c.*891_*893dupAAG	-	1662-1663	-	-	-	-	1	-	-	UPI00018C70F0	-
GLYMA10G01600	10:1174743-1174745	-	downstream_gene_variant	MODIFIER	GLYMA10G01600.1	protein_coding	-	-	-	-	-	-	-	1	-	I1L7P7_SOYBN	UPI000233C343	-
GLYMA10G01610	10:1174743-1174745	-	3_prime_UTR_variant	MODIFIER	GLYMA10G01610.1	protein_coding	GLYMA10G01610.1:c.*953_*954delGA	-	1715-1716	-	-	-	-	1	-	-	UPI00018C70F0	-
GLYMA10G01610	10:1177416-1177416	T	downstream_gene_variant	MODIFIER	GLYMA10G01610.1	protein_coding	-	-	-	-	-	-	-	1	-	-	UPI00018C70F0	-
GLYMA10G01620	10:1177416-1177416	T	upstream_gene_variant	MODIFIER	GLYMA10G01620.2	protein_coding	-	-	-	-	-	-	-	1	-	K7LGU6_SOYBN	UPI000294BEE8	-
GLYMA10G01610	10:1179231-1179232	-	downstream_gene_variant	MODIFIER	GLYMA10G01610.1	protein_coding	-	-	-	-	-	-	-	1	-	-	UPI00018C70F0	-
GLYMA10G01620	10:1179231-1179232	-	upstream_gene_variant	MODIFIER	GLYMA10G01620.2	protein_coding	-	-	-	-	-	-	-	1	-	K7LGU6_SOYBN	UPI000294BEE8	-
GLYMA10G01630	10:1179231-1179232	-	upstream_gene_variant	MODIFIER	GLYMA10G01630.1	protein_coding	-	-	-	-	-	-	-	1	-	K7LGU7_SOYBN	UPI000296E65F	-
GLYMA10G01620	10:1180965-1180965	G	frameshift_variant	HIGH	GLYMA10G01620.2	protein_coding	GLYMA10G01620.2:c.92_93insG	GLYMA10G01620.2:p.Pro33ThrfsTer81	92-93	92-93	31	T/TX	aca/acGa	1	-	K7LGU6_SOYBN	UPI000294BEE8	PANTHER:PTHR32401,PANTHER:PTHR32401:SF5
GLYMA10G01630	10:1180965-1180965	G	upstream_gene_variant	MODIFIER	GLYMA10G01630.1	protein_coding	-	-	-	-	-	-	-	1	-	K7LGU7_SOYBN	UPI000296E65F	-
GLYMA10G01620	10:1182207-1182208	-	downstream_gene_variant	MODIFIER	GLYMA10G01620.2	protein_coding	-	-	-	-	-	-	-	1	-	K7LGU6_SOYBN	UPI000294BEE8	-
GLYMA10G01630	10:1182207-1182208	-	upstream_gene_variant	MODIFIER	GLYMA10G01630.1	protein_coding	-	-	-	-	-	-	-	1	-	K7LGU7_SOYBN	UPI000296E65F	-
GLYMA10G01640	10:1182207-1182208	-	downstream_gene_variant	MODIFIER	GLYMA10G01640.1	protein_coding	-	-	-	-	-	-	-	-1	-	Q0GPH7_SOYBN	UPI0000DDB486	-
GLYMA10G01620	10:1182362-1182362	T	downstream_gene_variant	MODIFIER	GLYMA10G01620.2	protein_coding	-	-	-	-	-	-	-	1	-	K7LGU6_SOYBN	UPI000294BEE8	-
GLYMA10G01630	10:1182362-1182362	T	upstream_gene_variant	MODIFIER	GLYMA10G01630.1	protein_coding	-	-	-	-	-	-	-	1	-	K7LGU7_SOYBN	UPI000296E65F	-
GLYMA10G01640	10:1182362-1182362	T	downstream_gene_variant	MODIFIER	GLYMA10G01640.1	protein_coding	-	-	-	-	-	-	-	-1	-	Q0GPH7_SOYBN	UPI0000DDB486	-
GLYMA10G01620	10:1182472-1182472	A	downstream_gene_variant	MODIFIER	GLYMA10G01620.2	protein_coding	-	-	-	-	-	-	-	1	-	K7LGU6_SOYBN	UPI000294BEE8	-
GLYMA10G01630	10:1182472-1182472	A	upstream_gene_variant	MODIFIER	GLYMA10G01630.1	protein_coding	-	-	-	-	-	-	-	1	-	K7LGU7_SOYBN	UPI000296E65F	-
GLYMA10G01640	10:1182472-1182472	A	downstream_gene_variant	MODIFIER	GLYMA10G01640.1	protein_coding	-	-	-	-	-	-	-	-1	-	Q0GPH7_SOYBN	UPI0000DDB486	-
GLYMA10G01620	10:1182660-1182660	A	downstream_gene_variant	MODIFIER	GLYMA10G01620.2	protein_coding	-	-	-	-	-	-	-	1	-	K7LGU6_SOYBN	UPI000294BEE8	-
GLYMA10G01630	10:1182660-1182660	A	upstream_gene_variant	MODIFIER	GLYMA10G01630.1	protein_coding	-	-	-	-	-	-	-	1	-	K7LGU7_SOYBN	UPI000296E65F	-
GLYMA10G01640	10:1182660-1182660	A	downstream_gene_variant	MODIFIER	GLYMA10G01640.1	protein_coding	-	-	-	-	-	-	-	-1	-	Q0GPH7_SOYBN	UPI0000DDB486	-
GLYMA10G01620	10:1182693-1182693	TTATATTTAAT	downstream_gene_variant	MODIFIER	GLYMA10G01620.2	protein_coding	-	-	-	-	-	-	-	1	-	K7LGU6_SOYBN	UPI000294BEE8	-
GLYMA10G01630	10:1182693-1182693	TTATATTTAAT	upstream_gene_variant	MODIFIER	GLYMA10G01630.1	protein_coding	-	-	-	-	-	-	-	1	-	K7LGU7_SOYBN	UPI000296E65F	-
GLYMA10G01640	10:1182693-1182693	TTATATTTAAT	downstream_gene_variant	MODIFIER	GLYMA10G01640.1	protein_coding	-	-	-	-	-	-	-	-1	-	Q0GPH7_SOYBN	UPI0000DDB486	-
GLYMA10G01620	10:1182717-1182724	-	downstream_gene_variant	MODIFIER	GLYMA10G01620.2	protein_coding	-	-	-	-	-	-	-	1	-	K7LGU6_SOYBN	UPI000294BEE8	-
GLYMA10G01630	10:1182717-1182724	-	upstream_gene_variant	MODIFIER	GLYMA10G01630.1	protein_coding	-	-	-	-	-	-	-	1	-	K7LGU7_SOYBN	UPI000296E65F	-
GLYMA10G01640	10:1182717-1182724	-	downstream_gene_variant	MODIFIER	GLYMA10G01640.1	protein_coding	-	-	-	-	-	-	-	-1	-	Q0GPH7_SOYBN	UPI0000DDB486	-
GLYMA10G01620	10:1182731-1182731	T	downstream_gene_variant	MODIFIER	GLYMA10G01620.2	protein_coding	-	-	-	-	-	-	-	1	-	K7LGU6_SOYBN	UPI000294BEE8	-
GLYMA10G01630	10:1182731-1182731	T	upstream_gene_variant	MODIFIER	GLYMA10G01630.1	protein_coding	-	-	-	-	-	-	-	1	-	K7LGU7_SOYBN	UPI000296E65F	-
GLYMA10G01640	10:1182731-1182731	T	downstream_gene_variant	MODIFIER	GLYMA10G01640.1	protein_coding	-	-	-	-	-	-	-	-1	-	Q0GPH7_SOYBN	UPI0000DDB486	-
GLYMA10G01620	10:1183783-1183783	TTTTCTTTC	downstream_gene_variant	MODIFIER	GLYMA10G01620.2	protein_coding	-	-	-	-	-	-	-	1	-	K7LGU6_SOYBN	UPI000294BEE8	-
GLYMA10G01630	10:1183783-1183783	TTTTCTTTC	upstream_gene_variant	MODIFIER	GLYMA10G01630.1	protein_coding	-	-	-	-	-	-	-	1	-	K7LGU7_SOYBN	UPI000296E65F	-
GLYMA10G01640	10:1183783-1183783	TTTTCTTTC	downstream_gene_variant	MODIFIER	GLYMA10G01640.1	protein_coding	-	-	-	-	-	-	-	-1	-	Q0GPH7_SOYBN	UPI0000DDB486	-
GLYMA10G01660	10:1183783-1183783	TTTTCTTTC	upstream_gene_variant	MODIFIER	GLYMA10G01660.1	protein_coding	-	-	-	-	-	-	-	1	-	I1L7Q0_SOYBN	UPI0002966B25	-
GLYMA10G01620	10:1185659-1185659	AAT	downstream_gene_variant	MODIFIER	GLYMA10G01620.2	protein_coding	-	-	-	-	-	-	-	1	-	K7LGU6_SOYBN	UPI000294BEE8	-
GLYMA10G01630	10:1185659-1185659	AAT	downstream_gene_variant	MODIFIER	GLYMA10G01630.1	protein_coding	-	-	-	-	-	-	-	1	-	K7LGU7_SOYBN	UPI000296E65F	-
GLYMA10G01640	10:1185659-1185659	AAT	downstream_gene_variant	MODIFIER	GLYMA10G01640.1	protein_coding	-	-	-	-	-	-	-	-1	-	Q0GPH7_SOYBN	UPI0000DDB486	-
GLYMA10G01660	10:1185659-1185659	AAT	upstream_gene_variant	MODIFIER	GLYMA10G01660.1	protein_coding	-	-	-	-	-	-	-	1	-	I1L7Q0_SOYBN	UPI0002966B25	-
GLYMA10G01630	10:1188124-1188126	-	downstream_gene_variant	MODIFIER	GLYMA10G01630.1	protein_coding	-	-	-	-	-	-	-	1	-	K7LGU7_SOYBN	UPI000296E65F	-
GLYMA10G01640	10:1188124-1188126	-	upstream_gene_variant	MODIFIER	GLYMA10G01640.1	protein_coding	-	-	-	-	-	-	-	-1	-	Q0GPH7_SOYBN	UPI0000DDB486	-
GLYMA10G01660	10:1188124-1188126	-	upstream_gene_variant	MODIFIER	GLYMA10G01660.1	protein_coding	-	-	-	-	-	-	-	1	-	I1L7Q0_SOYBN	UPI0002966B25	-
GLYMA10G01630	10:1188231-1188231	AAG	downstream_gene_variant	MODIFIER	GLYMA10G01630.1	protein_coding	-	-	-	-	-	-	-	1	-	K7LGU7_SOYBN	UPI000296E65F	-
GLYMA10G01640	10:1188231-1188231	AAG	upstream_gene_variant	MODIFIER	GLYMA10G01640.1	protein_coding	-	-	-	-	-	-	-	-1	-	Q0GPH7_SOYBN	UPI0000DDB486	-
GLYMA10G01660	10:1188231-1188231	AAG	upstream_gene_variant	MODIFIER	GLYMA10G01660.1	protein_coding	-	-	-	-	-	-	-	1	-	I1L7Q0_SOYBN	UPI0002966B25	-
GLYMA10G01630	10:1188239-1188239	A	downstream_gene_variant	MODIFIER	GLYMA10G01630.1	protein_coding	-	-	-	-	-	-	-	1	-	K7LGU7_SOYBN	UPI000296E65F	-
GLYMA10G01640	10:1188239-1188239	A	upstream_gene_variant	MODIFIER	GLYMA10G01640.1	protein_coding	-	-	-	-	-	-	-	-1	-	Q0GPH7_SOYBN	UPI0000DDB486	-
GLYMA10G01660	10:1188239-1188239	A	upstream_gene_variant	MODIFIER	GLYMA10G01660.1	protein_coding	-	-	-	-	-	-	-	1	-	I1L7Q0_SOYBN	UPI0002966B25	-
GLYMA10G01630	10:1188271-1188271	CA	downstream_gene_variant	MODIFIER	GLYMA10G01630.1	protein_coding	-	-	-	-	-	-	-	1	-	K7LGU7_SOYBN	UPI000296E65F	-
GLYMA10G01640	10:1188271-1188271	CA	upstream_gene_variant	MODIFIER	GLYMA10G01640.1	protein_coding	-	-	-	-	-	-	-	-1	-	Q0GPH7_SOYBN	UPI0000DDB486	-
GLYMA10G01660	10:1188271-1188271	CA	upstream_gene_variant	MODIFIER	GLYMA10G01660.1	protein_coding	-	-	-	-	-	-	-	1	-	I1L7Q0_SOYBN	UPI0002966B25	-
GLYMA10G01630	10:1188660-1188660	TCGTCGTCGTCA	downstream_gene_variant	MODIFIER	GLYMA10G01630.1	protein_coding	-	-	-	-	-	-	-	1	-	K7LGU7_SOYBN	UPI000296E65F	-
GLYMA10G01640	10:1188660-1188660	TCGTCGTCGTCA	upstream_gene_variant	MODIFIER	GLYMA10G01640.1	protein_coding	-	-	-	-	-	-	-	-1	-	Q0GPH7_SOYBN	UPI0000DDB486	-
GLYMA10G01660	10:1188660-1188660	TCGTCGTCGTCA	intron_variant	MODIFIER	GLYMA10G01660.1	protein_coding	GLYMA10G01660.1:c.171+44_171+45insTCGTCATCGTCG	-	-	-	-	-	-	1	-	I1L7Q0_SOYBN	UPI0002966B25	-
GLYMA10G01640	10:1191680-1191680	T	upstream_gene_variant	MODIFIER	GLYMA10G01640.1	protein_coding	-	-	-	-	-	-	-	-1	-	Q0GPH7_SOYBN	UPI0000DDB486	-
GLYMA10G01660	10:1191680-1191680	T	intron_variant	MODIFIER	GLYMA10G01660.1	protein_coding	GLYMA10G01660.1:c.1009+420dupT	-	-	-	-	-	-	1	-	I1L7Q0_SOYBN	UPI0002966B25	-
GLYMA10G01660	10:1194052-1194052	GGGGGG	intron_variant	MODIFIER	GLYMA10G01660.1	protein_coding	GLYMA10G01660.1:c.1644+120_1644+125dupGGGGGG	-	-	-	-	-	-	1	-	I1L7Q0_SOYBN	UPI0002966B25	-
GLYMA10G01660	10:1194462-1194462	AT	intron_variant	MODIFIER	GLYMA10G01660.1	protein_coding	GLYMA10G01660.1:c.1644+529_1644+530dupTA	-	-	-	-	-	-	1	-	I1L7Q0_SOYBN	UPI0002966B25	-
GLYMA10G01671	10:1212786-1212786	TATA	intron_variant	MODIFIER	GLYMA10G01671.1	protein_coding	GLYMA10G01671.1:c.4236+27_4236+30dupATAT	-	-	-	-	-	-	1	-	K7LGU8_SOYBN	UPI000296A0DD	-
GLYMA10G01671	10:1212786-1212786	TATA	intron_variant	MODIFIER	GLYMA10G01671.2	protein_coding	GLYMA10G01671.2:c.4236+27_4236+30dupATAT	-	-	-	-	-	-	1	-	K7LGU8_SOYBN	UPI000296A0DD	-
GLYMA10G01671	10:1212786-1212786	TATA	intron_variant	MODIFIER	GLYMA10G01671.3	protein_coding	GLYMA10G01671.3:c.3222+27_3222+30dupATAT	-	-	-	-	-	-	1	-	K7LGV0_SOYBN	UPI000295CE8D	-
GLYMA10G01680	10:1212786-1212786	TATA	downstream_gene_variant	MODIFIER	GLYMA10G01680.1	protein_coding	-	-	-	-	-	-	-	-1	-	I1L7Q2_SOYBN	UPI00023C90A0	-
GLYMA10G01680	10:1221229-1221230	-	upstream_gene_variant	MODIFIER	GLYMA10G01680.1	protein_coding	-	-	-	-	-	-	-	-1	-	I1L7Q2_SOYBN	UPI00023C90A0	-
GLYMA10G01680	10:1222802-1222802	GTC	upstream_gene_variant	MODIFIER	GLYMA10G01680.1	protein_coding	-	-	-	-	-	-	-	-1	-	I1L7Q2_SOYBN	UPI00023C90A0	-
GLYMA10G01690	10:1222802-1222802	GTC	upstream_gene_variant	MODIFIER	GLYMA10G01690.1	protein_coding	-	-	-	-	-	-	-	1	-	C6SZS5_SOYBN	UPI0001B15188	-
GLYMA10G01680	10:1224413-1224413	A	upstream_gene_variant	MODIFIER	GLYMA10G01680.1	protein_coding	-	-	-	-	-	-	-	-1	-	I1L7Q2_SOYBN	UPI00023C90A0	-
GLYMA10G01690	10:1224413-1224413	A	upstream_gene_variant	MODIFIER	GLYMA10G01690.1	protein_coding	-	-	-	-	-	-	-	1	-	C6SZS5_SOYBN	UPI0001B15188	-
GLYMA10G01680	10:1224879-1224879	T	upstream_gene_variant	MODIFIER	GLYMA10G01680.1	protein_coding	-	-	-	-	-	-	-	-1	-	I1L7Q2_SOYBN	UPI00023C90A0	-
GLYMA10G01690	10:1224879-1224879	T	upstream_gene_variant	MODIFIER	GLYMA10G01690.1	protein_coding	-	-	-	-	-	-	-	1	-	C6SZS5_SOYBN	UPI0001B15188	-
GLYMA10G01680	10:1224902-1224902	TAGATAATACTG	upstream_gene_variant	MODIFIER	GLYMA10G01680.1	protein_coding	-	-	-	-	-	-	-	-1	-	I1L7Q2_SOYBN	UPI00023C90A0	-
GLYMA10G01690	10:1224902-1224902	TAGATAATACTG	upstream_gene_variant	MODIFIER	GLYMA10G01690.1	protein_coding	-	-	-	-	-	-	-	1	-	C6SZS5_SOYBN	UPI0001B15188	-
GLYMA10G01680	10:1225128-1225129	-	upstream_gene_variant	MODIFIER	GLYMA10G01680.1	protein_coding	-	-	-	-	-	-	-	-1	-	I1L7Q2_SOYBN	UPI00023C90A0	-
GLYMA10G01690	10:1225128-1225129	-	upstream_gene_variant	MODIFIER	GLYMA10G01690.1	protein_coding	-	-	-	-	-	-	-	1	-	C6SZS5_SOYBN	UPI0001B15188	-
GLYMA10G01680	10:1225476-1225476	A	upstream_gene_variant	MODIFIER	GLYMA10G01680.1	protein_coding	-	-	-	-	-	-	-	-1	-	I1L7Q2_SOYBN	UPI00023C90A0	-
GLYMA10G01690	10:1225476-1225476	A	upstream_gene_variant	MODIFIER	GLYMA10G01690.1	protein_coding	-	-	-	-	-	-	-	1	-	C6SZS5_SOYBN	UPI0001B15188	-
GLYMA10G01690	10:1225820-1225820	T	upstream_gene_variant	MODIFIER	GLYMA10G01690.1	protein_coding	-	-	-	-	-	-	-	1	-	C6SZS5_SOYBN	UPI0001B15188	-
GLYMA10G01690	10:1226117-1226117	A	upstream_gene_variant	MODIFIER	GLYMA10G01690.1	protein_coding	-	-	-	-	-	-	-	1	-	C6SZS5_SOYBN	UPI0001B15188	-
GLYMA10G01690	10:1227486-1227496	-	upstream_gene_variant	MODIFIER	GLYMA10G01690.1	protein_coding	-	-	-	-	-	-	-	1	-	C6SZS5_SOYBN	UPI0001B15188	-
GLYMA10G01700	10:1227486-1227496	-	upstream_gene_variant	MODIFIER	GLYMA10G01700.1	protein_coding	-	-	-	-	-	-	-	1	-	I1L7Q4_SOYBN	UPI000233C4F6	-
GLYMA10G01690	10:1227516-1227517	-	upstream_gene_variant	MODIFIER	GLYMA10G01690.1	protein_coding	-	-	-	-	-	-	-	1	-	C6SZS5_SOYBN	UPI0001B15188	-
GLYMA10G01700	10:1227516-1227517	-	upstream_gene_variant	MODIFIER	GLYMA10G01700.1	protein_coding	-	-	-	-	-	-	-	1	-	I1L7Q4_SOYBN	UPI000233C4F6	-
GLYMA10G01690	10:1233191-1233191	A	downstream_gene_variant	MODIFIER	GLYMA10G01690.1	protein_coding	-	-	-	-	-	-	-	1	-	C6SZS5_SOYBN	UPI0001B15188	-
GLYMA10G01700	10:1233191-1233191	A	3_prime_UTR_variant	MODIFIER	GLYMA10G01700.1	protein_coding	GLYMA10G01700.1:c.*439dupA	-	1421-1422	-	-	-	-	1	-	I1L7Q4_SOYBN	UPI000233C4F6	-
GLYMA10G01690	10:1233266-1233267	-	downstream_gene_variant	MODIFIER	GLYMA10G01690.1	protein_coding	-	-	-	-	-	-	-	1	-	C6SZS5_SOYBN	UPI0001B15188	-
GLYMA10G01700	10:1233266-1233267	-	3_prime_UTR_variant	MODIFIER	GLYMA10G01700.1	protein_coding	GLYMA10G01700.1:c.*511delG	-	1497	-	-	-	-	1	-	I1L7Q4_SOYBN	UPI000233C4F6	-
GLYMA10G01690	10:1233472-1233472	TA	downstream_gene_variant	MODIFIER	GLYMA10G01690.1	protein_coding	-	-	-	-	-	-	-	1	-	C6SZS5_SOYBN	UPI0001B15188	-
GLYMA10G01700	10:1233472-1233472	TA	3_prime_UTR_variant	MODIFIER	GLYMA10G01700.1	protein_coding	GLYMA10G01700.1:c.*717_*718dupTA	-	1702-1703	-	-	-	-	1	-	I1L7Q4_SOYBN	UPI000233C4F6	-
GLYMA10G01690	10:1233517-1233517	AGA	downstream_gene_variant	MODIFIER	GLYMA10G01690.1	protein_coding	-	-	-	-	-	-	-	1	-	C6SZS5_SOYBN	UPI0001B15188	-
GLYMA10G01700	10:1233517-1233517	AGA	3_prime_UTR_variant	MODIFIER	GLYMA10G01700.1	protein_coding	GLYMA10G01700.1:c.*761_*762insAGA	-	1747-1748	-	-	-	-	1	-	I1L7Q4_SOYBN	UPI000233C4F6	-
GLYMA10G01690	10:1233700-1233701	-	downstream_gene_variant	MODIFIER	GLYMA10G01690.1	protein_coding	-	-	-	-	-	-	-	1	-	C6SZS5_SOYBN	UPI0001B15188	-
GLYMA10G01700	10:1233700-1233701	-	downstream_gene_variant	MODIFIER	GLYMA10G01700.1	protein_coding	-	-	-	-	-	-	-	1	-	I1L7Q4_SOYBN	UPI000233C4F6	-
GLYMA10G01690	10:1233829-1233829	T	downstream_gene_variant	MODIFIER	GLYMA10G01690.1	protein_coding	-	-	-	-	-	-	-	1	-	C6SZS5_SOYBN	UPI0001B15188	-
GLYMA10G01700	10:1233829-1233829	T	downstream_gene_variant	MODIFIER	GLYMA10G01700.1	protein_coding	-	-	-	-	-	-	-	1	-	I1L7Q4_SOYBN	UPI000233C4F6	-
GLYMA10G01690	10:1233840-1233840	T	downstream_gene_variant	MODIFIER	GLYMA10G01690.1	protein_coding	-	-	-	-	-	-	-	1	-	C6SZS5_SOYBN	UPI0001B15188	-
GLYMA10G01700	10:1233840-1233840	T	downstream_gene_variant	MODIFIER	GLYMA10G01700.1	protein_coding	-	-	-	-	-	-	-	1	-	I1L7Q4_SOYBN	UPI000233C4F6	-
GLYMA10G01690	10:1233841-1233841	ATT	downstream_gene_variant	MODIFIER	GLYMA10G01690.1	protein_coding	-	-	-	-	-	-	-	1	-	C6SZS5_SOYBN	UPI0001B15188	-
GLYMA10G01700	10:1233841-1233841	ATT	downstream_gene_variant	MODIFIER	GLYMA10G01700.1	protein_coding	-	-	-	-	-	-	-	1	-	I1L7Q4_SOYBN	UPI000233C4F6	-
GLYMA10G01690	10:1234333-1234333	T	downstream_gene_variant	MODIFIER	GLYMA10G01690.1	protein_coding	-	-	-	-	-	-	-	1	-	C6SZS5_SOYBN	UPI0001B15188	-
GLYMA10G01700	10:1234333-1234333	T	downstream_gene_variant	MODIFIER	GLYMA10G01700.1	protein_coding	-	-	-	-	-	-	-	1	-	I1L7Q4_SOYBN	UPI000233C4F6	-
GLYMA10G01700	10:1234667-1234667	AC	downstream_gene_variant	MODIFIER	GLYMA10G01700.1	protein_coding	-	-	-	-	-	-	-	1	-	I1L7Q4_SOYBN	UPI000233C4F6	-
GLYMA10G01710	10:1234667-1234667	AC	upstream_gene_variant	MODIFIER	GLYMA10G01710.1	protein_coding	-	-	-	-	-	-	-	1	-	-	UPI0001B63B92	-
GLYMA10G01700	10:1234738-1234741	-	downstream_gene_variant	MODIFIER	GLYMA10G01700.1	protein_coding	-	-	-	-	-	-	-	1	-	I1L7Q4_SOYBN	UPI000233C4F6	-
GLYMA10G01710	10:1234738-1234741	-	upstream_gene_variant	MODIFIER	GLYMA10G01710.1	protein_coding	-	-	-	-	-	-	-	1	-	-	UPI0001B63B92	-
GLYMA10G01710	10:1240167-1240169	-	intron_variant	MODIFIER	GLYMA10G01710.1	protein_coding	GLYMA10G01710.1:c.396+280_396+281delAA	-	-	-	-	-	-	1	-	-	UPI0001B63B92	-
GLYMA10G01710	10:1240198-1240198	T	intron_variant	MODIFIER	GLYMA10G01710.1	protein_coding	GLYMA10G01710.1:c.396+306dupT	-	-	-	-	-	-	1	-	-	UPI0001B63B92	-
GLYMA10G01710	10:1240311-1240311	C	intron_variant	MODIFIER	GLYMA10G01710.1	protein_coding	GLYMA10G01710.1:c.396+413_396+414insC	-	-	-	-	-	-	1	-	-	UPI0001B63B92	-
GLYMA10G01710	10:1240484-1240484	T	intron_variant	MODIFIER	GLYMA10G01710.1	protein_coding	GLYMA10G01710.1:c.396+593dupT	-	-	-	-	-	-	1	-	-	UPI0001B63B92	-
GLYMA10G01710	10:1240767-1240767	AA	intron_variant	MODIFIER	GLYMA10G01710.1	protein_coding	GLYMA10G01710.1:c.396+882_396+883dupAA	-	-	-	-	-	-	1	-	-	UPI0001B63B92	-
GLYMA10G01710	10:1241929-1241929	AT	intron_variant	MODIFIER	GLYMA10G01710.1	protein_coding	GLYMA10G01710.1:c.397-75_397-74dupAT	-	-	-	-	-	-	1	-	-	UPI0001B63B92	-
GLYMA10G01710	10:1244354-1244354	AAGCCTAATCTG	intron_variant	MODIFIER	GLYMA10G01710.1	protein_coding	GLYMA10G01710.1:c.1708+73_1708+74insGCCTAATCTGAA	-	-	-	-	-	-	1	-	-	UPI0001B63B92	-
GLYMA10G01710	10:1249939-1249939	T	downstream_gene_variant	MODIFIER	GLYMA10G01710.1	protein_coding	-	-	-	-	-	-	-	1	-	-	UPI0001B63B92	-
-	10:1252313-1252313	TT	intergenic_variant	MODIFIER	-	-	-	-	-	-	-	-	-	-	-	-	-	-
-	10:1252693-1252693	CATTCTTACTAATAATTTA	intergenic_variant	MODIFIER	-	-	-	-	-	-	-	-	-	-	-	-	-	-
-	10:1253107-1253107	AA	intergenic_variant	MODIFIER	-	-	-	-	-	-	-	-	-	-	-	-	-	-
-	10:1253868-1253868	T	intergenic_variant	MODIFIER	-	-	-	-	-	-	-	-	-	-	-	-	-	-
GLYMA10G01720	10:1260842-1260843	-	upstream_gene_variant	MODIFIER	GLYMA10G01720.1	protein_coding	-	-	-	-	-	-	-	1	-	I1L7Q6_SOYBN	UPI0002961578	-
GLYMA10G01720	10:1263792-1263792	AAT	intron_variant	MODIFIER	GLYMA10G01720.1	protein_coding	GLYMA10G01720.1:c.459-407_459-405dupAAT	-	-	-	-	-	-	1	-	I1L7Q6_SOYBN	UPI0002961578	-
GLYMA10G01720	10:1265155-1265155	A	frameshift_variant	HIGH	GLYMA10G01720.1	protein_coding	GLYMA10G01720.1:c.1400dupA	GLYMA10G01720.1:p.Pro468AlafsTer10	1674-1675	1399-1400	467	E/EX	gag/gAag	1	-	I1L7Q6_SOYBN	UPI0002961578	PANTHER:PTHR22904,PANTHER:PTHR22904:SF7
GLYMA10G01720	10:1265165-1265165	A	frameshift_variant	HIGH	GLYMA10G01720.1	protein_coding	GLYMA10G01720.1:c.1411dupA	GLYMA10G01720.1:p.Thr471AsnfsTer7	1684-1685	1409-1410	470	R/RX	aga/agAa	1	-	I1L7Q6_SOYBN	UPI0002961578	PANTHER:PTHR22904,PANTHER:PTHR22904:SF7
GLYMA10G01720	10:1266699-1266699	G	downstream_gene_variant	MODIFIER	GLYMA10G01720.1	protein_coding	-	-	-	-	-	-	-	1	-	I1L7Q6_SOYBN	UPI0002961578	-
GLYMA10G01720	10:1266704-1266704	AT	downstream_gene_variant	MODIFIER	GLYMA10G01720.1	protein_coding	-	-	-	-	-	-	-	1	-	I1L7Q6_SOYBN	UPI0002961578	-
GLYMA10G01720	10:1267798-1267798	AGAT	downstream_gene_variant	MODIFIER	GLYMA10G01720.1	protein_coding	-	-	-	-	-	-	-	1	-	I1L7Q6_SOYBN	UPI0002961578	-
GLYMA10G01740	10:1267798-1267798	AGAT	downstream_gene_variant	MODIFIER	GLYMA10G01740.1	protein_coding	-	-	-	-	-	-	-	-1	-	I1L7Q7_SOYBN	UPI000296442B	-
GLYMA10G01720	10:1268933-1268933	GT	downstream_gene_variant	MODIFIER	GLYMA10G01720.1	protein_coding	-	-	-	-	-	-	-	1	-	I1L7Q6_SOYBN	UPI0002961578	-
GLYMA10G01740	10:1268933-1268933	GT	downstream_gene_variant	MODIFIER	GLYMA10G01740.1	protein_coding	-	-	-	-	-	-	-	-1	-	I1L7Q7_SOYBN	UPI000296442B	-
GLYMA10G01720	10:1270300-1270300	A	downstream_gene_variant	MODIFIER	GLYMA10G01720.1	protein_coding	-	-	-	-	-	-	-	1	-	I1L7Q6_SOYBN	UPI0002961578	-
GLYMA10G01740	10:1270300-1270300	A	downstream_gene_variant	MODIFIER	GLYMA10G01740.1	protein_coding	-	-	-	-	-	-	-	-1	-	I1L7Q7_SOYBN	UPI000296442B	-
GLYMA10G01740	10:1270779-1270779	A	downstream_gene_variant	MODIFIER	GLYMA10G01740.1	protein_coding	-	-	-	-	-	-	-	-1	-	I1L7Q7_SOYBN	UPI000296442B	-
GLYMA10G01740	10:1271186-1271186	AAA	downstream_gene_variant	MODIFIER	GLYMA10G01740.1	protein_coding	-	-	-	-	-	-	-	-1	-	I1L7Q7_SOYBN	UPI000296442B	-
GLYMA10G01740	10:1271868-1271868	ATA	3_prime_UTR_variant	MODIFIER	GLYMA10G01740.1	protein_coding	GLYMA10G01740.1:c.*276_*278dupTAT	-	4400-4401	-	-	-	-	-1	-	I1L7Q7_SOYBN	UPI000296442B	-
GLYMA10G01740	10:1271883-1271884	-	3_prime_UTR_variant	MODIFIER	GLYMA10G01740.1	protein_coding	GLYMA10G01740.1:c.*263delA	-	4385	-	-	-	-	-1	-	I1L7Q7_SOYBN	UPI000296442B	-
GLYMA10G01740	10:1280546-1280546	TTT	upstream_gene_variant	MODIFIER	GLYMA10G01740.1	protein_coding	-	-	-	-	-	-	-	-1	-	I1L7Q7_SOYBN	UPI000296442B	-
GLYMA10G01750	10:1280546-1280546	TTT	intron_variant	MODIFIER	GLYMA10G01750.1	protein_coding	GLYMA10G01750.1:c.412-192_412-191insTTT	-	-	-	-	-	-	1	-	C6SXE8_SOYBN	UPI0001B152C1	-
GLYMA10G01750	10:1280546-1280546	TTT	intron_variant	MODIFIER	GLYMA10G01750.2	protein_coding	GLYMA10G01750.2:c.235-192_235-191insTTT	-	-	-	-	-	-	1	-	I1L7Q9_SOYBN	UPI00023C923E	-
GLYMA10G01760	10:1280546-1280546	TTT	downstream_gene_variant	MODIFIER	GLYMA10G01760.1	protein_coding	-	-	-	-	-	-	-	-1	-	I1L7R0_SOYBN	UPI00023C9240	-
GLYMA10G01740	10:1280613-1280613	AAT	upstream_gene_variant	MODIFIER	GLYMA10G01740.1	protein_coding	-	-	-	-	-	-	-	-1	-	I1L7Q7_SOYBN	UPI000296442B	-
GLYMA10G01750	10:1280613-1280613	AAT	intron_variant	MODIFIER	GLYMA10G01750.1	protein_coding	GLYMA10G01750.1:c.412-124_412-122dupAAT	-	-	-	-	-	-	1	-	C6SXE8_SOYBN	UPI0001B152C1	-
GLYMA10G01750	10:1280613-1280613	AAT	intron_variant	MODIFIER	GLYMA10G01750.2	protein_coding	GLYMA10G01750.2:c.235-124_235-122dupAAT	-	-	-	-	-	-	1	-	I1L7Q9_SOYBN	UPI00023C923E	-
GLYMA10G01760	10:1280613-1280613	AAT	downstream_gene_variant	MODIFIER	GLYMA10G01760.1	protein_coding	-	-	-	-	-	-	-	-1	-	I1L7R0_SOYBN	UPI00023C9240	-
GLYMA10G01750	10:1284807-1284807	AA	downstream_gene_variant	MODIFIER	GLYMA10G01750.1	protein_coding	-	-	-	-	-	-	-	1	-	C6SXE8_SOYBN	UPI0001B152C1	-
GLYMA10G01750	10:1284807-1284807	AA	downstream_gene_variant	MODIFIER	GLYMA10G01750.2	protein_coding	-	-	-	-	-	-	-	1	-	I1L7Q9_SOYBN	UPI00023C923E	-
GLYMA10G01760	10:1284807-1284807	AA	intron_variant	MODIFIER	GLYMA10G01760.1	protein_coding	GLYMA10G01760.1:c.453-368_453-367dupTT	-	-	-	-	-	-	-1	-	I1L7R0_SOYBN	UPI00023C9240	-
GLYMA10G01770	10:1284807-1284807	AA	downstream_gene_variant	MODIFIER	GLYMA10G01770.1	protein_coding	-	-	-	-	-	-	-	-1	-	I1L7R1_SOYBN	UPI000233C4D2	-
GLYMA10G01750	10:1285265-1285265	A	downstream_gene_variant	MODIFIER	GLYMA10G01750.1	protein_coding	-	-	-	-	-	-	-	1	-	C6SXE8_SOYBN	UPI0001B152C1	-
GLYMA10G01750	10:1285265-1285265	A	downstream_gene_variant	MODIFIER	GLYMA10G01750.2	protein_coding	-	-	-	-	-	-	-	1	-	I1L7Q9_SOYBN	UPI00023C923E	-
GLYMA10G01760	10:1285265-1285265	A	intron_variant	MODIFIER	GLYMA10G01760.1	protein_coding	GLYMA10G01760.1:c.452+394dupT	-	-	-	-	-	-	-1	-	I1L7R0_SOYBN	UPI00023C9240	-
GLYMA10G01770	10:1285265-1285265	A	downstream_gene_variant	MODIFIER	GLYMA10G01770.1	protein_coding	-	-	-	-	-	-	-	-1	-	I1L7R1_SOYBN	UPI000233C4D2	-
GLYMA10G01750	10:1285449-1285449	T	downstream_gene_variant	MODIFIER	GLYMA10G01750.1	protein_coding	-	-	-	-	-	-	-	1	-	C6SXE8_SOYBN	UPI0001B152C1	-
GLYMA10G01750	10:1285449-1285449	T	downstream_gene_variant	MODIFIER	GLYMA10G01750.2	protein_coding	-	-	-	-	-	-	-	1	-	I1L7Q9_SOYBN	UPI00023C923E	-
GLYMA10G01760	10:1285449-1285449	T	intron_variant	MODIFIER	GLYMA10G01760.1	protein_coding	GLYMA10G01760.1:c.452+210dupA	-	-	-	-	-	-	-1	-	I1L7R0_SOYBN	UPI00023C9240	-
GLYMA10G01770	10:1285449-1285449	T	downstream_gene_variant	MODIFIER	GLYMA10G01770.1	protein_coding	-	-	-	-	-	-	-	-1	-	I1L7R1_SOYBN	UPI000233C4D2	-
GLYMA10G01760	10:1286579-1286579	CCCCA	intron_variant	MODIFIER	GLYMA10G01760.1	protein_coding	GLYMA10G01760.1:c.178-129_178-128insTGGGG	-	-	-	-	-	-	-1	-	I1L7R0_SOYBN	UPI00023C9240	-
GLYMA10G01770	10:1286579-1286579	CCCCA	downstream_gene_variant	MODIFIER	GLYMA10G01770.1	protein_coding	-	-	-	-	-	-	-	-1	-	I1L7R1_SOYBN	UPI000233C4D2	-
GLYMA10G01760	10:1287720-1287720	A	upstream_gene_variant	MODIFIER	GLYMA10G01760.1	protein_coding	-	-	-	-	-	-	-	-1	-	I1L7R0_SOYBN	UPI00023C9240	-
GLYMA10G01770	10:1287720-1287720	A	downstream_gene_variant	MODIFIER	GLYMA10G01770.1	protein_coding	-	-	-	-	-	-	-	-1	-	I1L7R1_SOYBN	UPI000233C4D2	-
GLYMA10G01760	10:1287764-1287764	GT	upstream_gene_variant	MODIFIER	GLYMA10G01760.1	protein_coding	-	-	-	-	-	-	-	-1	-	I1L7R0_SOYBN	UPI00023C9240	-
GLYMA10G01770	10:1287764-1287764	GT	downstream_gene_variant	MODIFIER	GLYMA10G01770.1	protein_coding	-	-	-	-	-	-	-	-1	-	I1L7R1_SOYBN	UPI000233C4D2	-
GLYMA10G01760	10:1287839-1287839	T	upstream_gene_variant	MODIFIER	GLYMA10G01760.1	protein_coding	-	-	-	-	-	-	-	-1	-	I1L7R0_SOYBN	UPI00023C9240	-
GLYMA10G01770	10:1287839-1287839	T	downstream_gene_variant	MODIFIER	GLYMA10G01770.1	protein_coding	-	-	-	-	-	-	-	-1	-	I1L7R1_SOYBN	UPI000233C4D2	-
GLYMA10G01760	10:1292349-1292349	A	upstream_gene_variant	MODIFIER	GLYMA10G01760.1	protein_coding	-	-	-	-	-	-	-	-1	-	I1L7R0_SOYBN	UPI00023C9240	-
GLYMA10G01770	10:1292349-1292349	A	intron_variant	MODIFIER	GLYMA10G01770.1	protein_coding	GLYMA10G01770.1:c.594+89dupT	-	-	-	-	-	-	-1	-	I1L7R1_SOYBN	UPI000233C4D2	-
GLYMA10G01780	10:1292349-1292349	A	upstream_gene_variant	MODIFIER	GLYMA10G01780.1	protein_coding	-	-	-	-	-	-	-	1	-	I1L7R2_SOYBN	UPI0001CA9D73	-
GLYMA10G01780	10:1292349-1292349	A	upstream_gene_variant	MODIFIER	GLYMA10G01780.3	protein_coding	-	-	-	-	-	-	-	1	-	I1L7R2_SOYBN	UPI0001CA9D73	-
GLYMA10G01770	10:1293174-1293174	GAGAGA	5_prime_UTR_variant	MODIFIER	GLYMA10G01770.1	protein_coding	GLYMA10G01770.1:c.-148_-143dupTCTCTC	-	304-305	-	-	-	-	-1	-	I1L7R1_SOYBN	UPI000233C4D2	-
GLYMA10G01780	10:1293174-1293174	GAGAGA	upstream_gene_variant	MODIFIER	GLYMA10G01780.1	protein_coding	-	-	-	-	-	-	-	1	-	I1L7R2_SOYBN	UPI0001CA9D73	-
GLYMA10G01780	10:1293174-1293174	GAGAGA	upstream_gene_variant	MODIFIER	GLYMA10G01780.3	protein_coding	-	-	-	-	-	-	-	1	-	I1L7R2_SOYBN	UPI0001CA9D73	-
GLYMA10G01770	10:1293238-1293238	A	5_prime_UTR_variant	MODIFIER	GLYMA10G01770.1	protein_coding	GLYMA10G01770.1:c.-207dupT	-	240-241	-	-	-	-	-1	-	I1L7R1_SOYBN	UPI000233C4D2	-
GLYMA10G01780	10:1293238-1293238	A	upstream_gene_variant	MODIFIER	GLYMA10G01780.1	protein_coding	-	-	-	-	-	-	-	1	-	I1L7R2_SOYBN	UPI0001CA9D73	-
GLYMA10G01780	10:1293238-1293238	A	upstream_gene_variant	MODIFIER	GLYMA10G01780.3	protein_coding	-	-	-	-	-	-	-	1	-	I1L7R2_SOYBN	UPI0001CA9D73	-
GLYMA10G01770	10:1294368-1294368	CG	upstream_gene_variant	MODIFIER	GLYMA10G01770.1	protein_coding	-	-	-	-	-	-	-	-1	-	I1L7R1_SOYBN	UPI000233C4D2	-
GLYMA10G01780	10:1294368-1294368	CG	upstream_gene_variant	MODIFIER	GLYMA10G01780.1	protein_coding	-	-	-	-	-	-	-	1	-	I1L7R2_SOYBN	UPI0001CA9D73	-
GLYMA10G01780	10:1294368-1294368	CG	upstream_gene_variant	MODIFIER	GLYMA10G01780.3	protein_coding	-	-	-	-	-	-	-	1	-	I1L7R2_SOYBN	UPI0001CA9D73	-
GLYMA10G01770	10:1294858-1294858	AT	upstream_gene_variant	MODIFIER	GLYMA10G01770.1	protein_coding	-	-	-	-	-	-	-	-1	-	I1L7R1_SOYBN	UPI000233C4D2	-
GLYMA10G01780	10:1294858-1294858	AT	upstream_gene_variant	MODIFIER	GLYMA10G01780.1	protein_coding	-	-	-	-	-	-	-	1	-	I1L7R2_SOYBN	UPI0001CA9D73	-
GLYMA10G01780	10:1294858-1294858	AT	upstream_gene_variant	MODIFIER	GLYMA10G01780.3	protein_coding	-	-	-	-	-	-	-	1	-	I1L7R2_SOYBN	UPI0001CA9D73	-
GLYMA10G01770	10:1294969-1294969	TTCAA	upstream_gene_variant	MODIFIER	GLYMA10G01770.1	protein_coding	-	-	-	-	-	-	-	-1	-	I1L7R1_SOYBN	UPI000233C4D2	-
GLYMA10G01780	10:1294969-1294969	TTCAA	upstream_gene_variant	MODIFIER	GLYMA10G01780.1	protein_coding	-	-	-	-	-	-	-	1	-	I1L7R2_SOYBN	UPI0001CA9D73	-
GLYMA10G01780	10:1294969-1294969	TTCAA	upstream_gene_variant	MODIFIER	GLYMA10G01780.3	protein_coding	-	-	-	-	-	-	-	1	-	I1L7R2_SOYBN	UPI0001CA9D73	-
GLYMA10G01770	10:1295365-1295366	-	upstream_gene_variant	MODIFIER	GLYMA10G01770.1	protein_coding	-	-	-	-	-	-	-	-1	-	I1L7R1_SOYBN	UPI000233C4D2	-
GLYMA10G01780	10:1295365-1295366	-	upstream_gene_variant	MODIFIER	GLYMA10G01780.1	protein_coding	-	-	-	-	-	-	-	1	-	I1L7R2_SOYBN	UPI0001CA9D73	-
GLYMA10G01780	10:1295365-1295366	-	upstream_gene_variant	MODIFIER	GLYMA10G01780.3	protein_coding	-	-	-	-	-	-	-	1	-	I1L7R2_SOYBN	UPI0001CA9D73	-
GLYMA10G01770	10:1296478-1296478	TA	upstream_gene_variant	MODIFIER	GLYMA10G01770.1	protein_coding	-	-	-	-	-	-	-	-1	-	I1L7R1_SOYBN	UPI000233C4D2	-
GLYMA10G01780	10:1296478-1296478	TA	intron_variant	MODIFIER	GLYMA10G01780.1	protein_coding	GLYMA10G01780.1:c.-110+68_-110+69insAT	-	-	-	-	-	-	1	-	I1L7R2_SOYBN	UPI0001CA9D73	-
GLYMA10G01780	10:1296478-1296478	TA	intron_variant	MODIFIER	GLYMA10G01780.3	protein_coding	GLYMA10G01780.3:c.-110+68_-110+69insAT	-	-	-	-	-	-	1	-	I1L7R2_SOYBN	UPI0001CA9D73	-
GLYMA10G01780	10:1299394-1299394	ACGAA	downstream_gene_variant	MODIFIER	GLYMA10G01780.1	protein_coding	-	-	-	-	-	-	-	1	-	I1L7R2_SOYBN	UPI0001CA9D73	-
GLYMA10G01780	10:1299394-1299394	ACGAA	downstream_gene_variant	MODIFIER	GLYMA10G01780.3	protein_coding	-	-	-	-	-	-	-	1	-	I1L7R2_SOYBN	UPI0001CA9D73	-
GLYMA10G01780	10:1301663-1301663	T	downstream_gene_variant	MODIFIER	GLYMA10G01780.1	protein_coding	-	-	-	-	-	-	-	1	-	I1L7R2_SOYBN	UPI0001CA9D73	-
GLYMA10G01780	10:1301663-1301663	T	downstream_gene_variant	MODIFIER	GLYMA10G01780.3	protein_coding	-	-	-	-	-	-	-	1	-	I1L7R2_SOYBN	UPI0001CA9D73	-
GLYMA10G01801	10:1304152-1304152	T	upstream_gene_variant	MODIFIER	GLYMA10G01801.1	protein_coding	-	-	-	-	-	-	-	1	-	K7LGV2_SOYBN	UPI00029649DF	-
GLYMA10G01801	10:1306990-1306990	AC	upstream_gene_variant	MODIFIER	GLYMA10G01801.1	protein_coding	-	-	-	-	-	-	-	1	-	K7LGV2_SOYBN	UPI00029649DF	-
GLYMA10G01801	10:1308496-1308496	CAT	upstream_gene_variant	MODIFIER	GLYMA10G01801.1	protein_coding	-	-	-	-	-	-	-	1	-	K7LGV2_SOYBN	UPI00029649DF	-
GLYMA10G01801	10:1308500-1308500	TTTT	upstream_gene_variant	MODIFIER	GLYMA10G01801.1	protein_coding	-	-	-	-	-	-	-	1	-	K7LGV2_SOYBN	UPI00029649DF	-
GLYMA10G01801	10:1310220-1310220	A	intron_variant	MODIFIER	GLYMA10G01801.1	protein_coding	GLYMA10G01801.1:c.263+864dupA	-	-	-	-	-	-	1	-	K7LGV2_SOYBN	UPI00029649DF	-
GLYMA10G01801	10:1312237-1312237	A	intron_variant	MODIFIER	GLYMA10G01801.1	protein_coding	GLYMA10G01801.1:c.264-298dupA	-	-	-	-	-	-	1	-	K7LGV2_SOYBN	UPI00029649DF	-
GLYMA10G01801	10:1313406-1313406	T	downstream_gene_variant	MODIFIER	GLYMA10G01801.1	protein_coding	-	-	-	-	-	-	-	1	-	K7LGV2_SOYBN	UPI00029649DF	-
GLYMA10G01820	10:1313406-1313406	T	upstream_gene_variant	MODIFIER	GLYMA10G01820.1	protein_coding	-	-	-	-	-	-	-	1	-	I1L7R5_SOYBN	UPI00003B336D	-
GLYMA10G01801	10:1314667-1314667	A	downstream_gene_variant	MODIFIER	GLYMA10G01801.1	protein_coding	-	-	-	-	-	-	-	1	-	K7LGV2_SOYBN	UPI00029649DF	-
GLYMA10G01820	10:1314667-1314667	A	upstream_gene_variant	MODIFIER	GLYMA10G01820.1	protein_coding	-	-	-	-	-	-	-	1	-	I1L7R5_SOYBN	UPI00003B336D	-
GLYMA10G01801	10:1315996-1315996	ATTTTGCT	downstream_gene_variant	MODIFIER	GLYMA10G01801.1	protein_coding	-	-	-	-	-	-	-	1	-	K7LGV2_SOYBN	UPI00029649DF	-
GLYMA10G01820	10:1315996-1315996	ATTTTGCT	upstream_gene_variant	MODIFIER	GLYMA10G01820.1	protein_coding	-	-	-	-	-	-	-	1	-	I1L7R5_SOYBN	UPI00003B336D	-
GLYMA10G01801	10:1316175-1316175	C	downstream_gene_variant	MODIFIER	GLYMA10G01801.1	protein_coding	-	-	-	-	-	-	-	1	-	K7LGV2_SOYBN	UPI00029649DF	-
GLYMA10G01820	10:1316175-1316175	C	upstream_gene_variant	MODIFIER	GLYMA10G01820.1	protein_coding	-	-	-	-	-	-	-	1	-	I1L7R5_SOYBN	UPI00003B336D	-
GLYMA10G01801	10:1318024-1318024	AA	downstream_gene_variant	MODIFIER	GLYMA10G01801.1	protein_coding	-	-	-	-	-	-	-	1	-	K7LGV2_SOYBN	UPI00029649DF	-
GLYMA10G01820	10:1318024-1318024	AA	intron_variant	MODIFIER	GLYMA10G01820.1	protein_coding	GLYMA10G01820.1:c.167+214_167+215insAA	-	-	-	-	-	-	1	-	I1L7R5_SOYBN	UPI00003B336D	-
GLYMA10G01830	10:1318024-1318024	AA	downstream_gene_variant	MODIFIER	GLYMA10G01830.1	protein_coding	-	-	-	-	-	-	-	-1	-	I1L7R6_SOYBN	UPI000233C4DB	-
GLYMA10G01801	10:1318026-1318026	GACC	downstream_gene_variant	MODIFIER	GLYMA10G01801.1	protein_coding	-	-	-	-	-	-	-	1	-	K7LGV2_SOYBN	UPI00029649DF	-
GLYMA10G01820	10:1318026-1318026	GACC	intron_variant	MODIFIER	GLYMA10G01820.1	protein_coding	GLYMA10G01820.1:c.167+215_167+216insGACC	-	-	-	-	-	-	1	-	I1L7R5_SOYBN	UPI00003B336D	-
GLYMA10G01830	10:1318026-1318026	GACC	downstream_gene_variant	MODIFIER	GLYMA10G01830.1	protein_coding	-	-	-	-	-	-	-	-1	-	I1L7R6_SOYBN	UPI000233C4DB	-
GLYMA10G01820	10:1326977-1326977	AA	downstream_gene_variant	MODIFIER	GLYMA10G01820.1	protein_coding	-	-	-	-	-	-	-	1	-	I1L7R5_SOYBN	UPI00003B336D	-
GLYMA10G01830	10:1326977-1326977	AA	upstream_gene_variant	MODIFIER	GLYMA10G01830.1	protein_coding	-	-	-	-	-	-	-	-1	-	I1L7R6_SOYBN	UPI000233C4DB	-
GLYMA10G01840	10:1326977-1326977	AA	upstream_gene_variant	MODIFIER	GLYMA10G01840.1	protein_coding	-	-	-	-	-	-	-	1	-	I1L7R7_SOYBN	UPI00023C924C	-
GLYMA10G01830	10:1328234-1328234	A	upstream_gene_variant	MODIFIER	GLYMA10G01830.1	protein_coding	-	-	-	-	-	-	-	-1	-	I1L7R6_SOYBN	UPI000233C4DB	-
GLYMA10G01840	10:1328234-1328234	A	upstream_gene_variant	MODIFIER	GLYMA10G01840.1	protein_coding	-	-	-	-	-	-	-	1	-	I1L7R7_SOYBN	UPI00023C924C	-
GLYMA10G01830	10:1328465-1328465	TAT	upstream_gene_variant	MODIFIER	GLYMA10G01830.1	protein_coding	-	-	-	-	-	-	-	-1	-	I1L7R6_SOYBN	UPI000233C4DB	-
GLYMA10G01840	10:1328465-1328465	TAT	upstream_gene_variant	MODIFIER	GLYMA10G01840.1	protein_coding	-	-	-	-	-	-	-	1	-	I1L7R7_SOYBN	UPI00023C924C	-
GLYMA10G01830	10:1328745-1328746	-	upstream_gene_variant	MODIFIER	GLYMA10G01830.1	protein_coding	-	-	-	-	-	-	-	-1	-	I1L7R6_SOYBN	UPI000233C4DB	-
GLYMA10G01840	10:1328745-1328746	-	upstream_gene_variant	MODIFIER	GLYMA10G01840.1	protein_coding	-	-	-	-	-	-	-	1	-	I1L7R7_SOYBN	UPI00023C924C	-
GLYMA10G01830	10:1328786-1328786	T	upstream_gene_variant	MODIFIER	GLYMA10G01830.1	protein_coding	-	-	-	-	-	-	-	-1	-	I1L7R6_SOYBN	UPI000233C4DB	-
GLYMA10G01840	10:1328786-1328786	T	upstream_gene_variant	MODIFIER	GLYMA10G01840.1	protein_coding	-	-	-	-	-	-	-	1	-	I1L7R7_SOYBN	UPI00023C924C	-
GLYMA10G01830	10:1329068-1329069	-	upstream_gene_variant	MODIFIER	GLYMA10G01830.1	protein_coding	-	-	-	-	-	-	-	-1	-	I1L7R6_SOYBN	UPI000233C4DB	-
GLYMA10G01840	10:1329068-1329069	-	upstream_gene_variant	MODIFIER	GLYMA10G01840.1	protein_coding	-	-	-	-	-	-	-	1	-	I1L7R7_SOYBN	UPI00023C924C	-
GLYMA10G01830	10:1329092-1329099	-	upstream_gene_variant	MODIFIER	GLYMA10G01830.1	protein_coding	-	-	-	-	-	-	-	-1	-	I1L7R6_SOYBN	UPI000233C4DB	-
GLYMA10G01840	10:1329092-1329099	-	upstream_gene_variant	MODIFIER	GLYMA10G01840.1	protein_coding	-	-	-	-	-	-	-	1	-	I1L7R7_SOYBN	UPI00023C924C	-
GLYMA10G01830	10:1329758-1329758	ATT	upstream_gene_variant	MODIFIER	GLYMA10G01830.1	protein_coding	-	-	-	-	-	-	-	-1	-	I1L7R6_SOYBN	UPI000233C4DB	-
GLYMA10G01840	10:1329758-1329758	ATT	upstream_gene_variant	MODIFIER	GLYMA10G01840.1	protein_coding	-	-	-	-	-	-	-	1	-	I1L7R7_SOYBN	UPI00023C924C	-
GLYMA10G01830	10:1330137-1330137	AA	upstream_gene_variant	MODIFIER	GLYMA10G01830.1	protein_coding	-	-	-	-	-	-	-	-1	-	I1L7R6_SOYBN	UPI000233C4DB	-
GLYMA10G01840	10:1330137-1330137	AA	upstream_gene_variant	MODIFIER	GLYMA10G01840.1	protein_coding	-	-	-	-	-	-	-	1	-	I1L7R7_SOYBN	UPI00023C924C	-
GLYMA10G01830	10:1330437-1330437	AA	upstream_gene_variant	MODIFIER	GLYMA10G01830.1	protein_coding	-	-	-	-	-	-	-	-1	-	I1L7R6_SOYBN	UPI000233C4DB	-
GLYMA10G01840	10:1330437-1330437	AA	upstream_gene_variant	MODIFIER	GLYMA10G01840.1	protein_coding	-	-	-	-	-	-	-	1	-	I1L7R7_SOYBN	UPI00023C924C	-
GLYMA10G01830	10:1330495-1330496	-	upstream_gene_variant	MODIFIER	GLYMA10G01830.1	protein_coding	-	-	-	-	-	-	-	-1	-	I1L7R6_SOYBN	UPI000233C4DB	-
GLYMA10G01840	10:1330495-1330496	-	upstream_gene_variant	MODIFIER	GLYMA10G01840.1	protein_coding	-	-	-	-	-	-	-	1	-	I1L7R7_SOYBN	UPI00023C924C	-
GLYMA10G01830	10:1330795-1330796	-	upstream_gene_variant	MODIFIER	GLYMA10G01830.1	protein_coding	-	-	-	-	-	-	-	-1	-	I1L7R6_SOYBN	UPI000233C4DB	-
GLYMA10G01840	10:1330795-1330796	-	upstream_gene_variant	MODIFIER	GLYMA10G01840.1	protein_coding	-	-	-	-	-	-	-	1	-	I1L7R7_SOYBN	UPI00023C924C	-
GLYMA10G01830	10:1330904-1330904	T	upstream_gene_variant	MODIFIER	GLYMA10G01830.1	protein_coding	-	-	-	-	-	-	-	-1	-	I1L7R6_SOYBN	UPI000233C4DB	-
GLYMA10G01840	10:1330904-1330904	T	upstream_gene_variant	MODIFIER	GLYMA10G01840.1	protein_coding	-	-	-	-	-	-	-	1	-	I1L7R7_SOYBN	UPI00023C924C	-
GLYMA10G01830	10:1330911-1330911	T	upstream_gene_variant	MODIFIER	GLYMA10G01830.1	protein_coding	-	-	-	-	-	-	-	-1	-	I1L7R6_SOYBN	UPI000233C4DB	-
GLYMA10G01840	10:1330911-1330911	T	upstream_gene_variant	MODIFIER	GLYMA10G01840.1	protein_coding	-	-	-	-	-	-	-	1	-	I1L7R7_SOYBN	UPI00023C924C	-
GLYMA10G01830	10:1330916-1330916	T	upstream_gene_variant	MODIFIER	GLYMA10G01830.1	protein_coding	-	-	-	-	-	-	-	-1	-	I1L7R6_SOYBN	UPI000233C4DB	-
GLYMA10G01840	10:1330916-1330916	T	upstream_gene_variant	MODIFIER	GLYMA10G01840.1	protein_coding	-	-	-	-	-	-	-	1	-	I1L7R7_SOYBN	UPI00023C924C	-
GLYMA10G01830	10:1330920-1330920	TTTTTTCT	upstream_gene_variant	MODIFIER	GLYMA10G01830.1	protein_coding	-	-	-	-	-	-	-	-1	-	I1L7R6_SOYBN	UPI000233C4DB	-
GLYMA10G01840	10:1330920-1330920	TTTTTTCT	upstream_gene_variant	MODIFIER	GLYMA10G01840.1	protein_coding	-	-	-	-	-	-	-	1	-	I1L7R7_SOYBN	UPI00023C924C	-
GLYMA10G01840	10:1340343-1340343	T	downstream_gene_variant	MODIFIER	GLYMA10G01840.1	protein_coding	-	-	-	-	-	-	-	1	-	I1L7R7_SOYBN	UPI00023C924C	-
GLYMA10G01850	10:1340343-1340343	T	upstream_gene_variant	MODIFIER	GLYMA10G01850.1	protein_coding	-	-	-	-	-	-	-	-1	-	I1L7R8_SOYBN	UPI000233C639	-
GLYMA10G01860	10:1340343-1340343	T	upstream_gene_variant	MODIFIER	GLYMA10G01860.1	protein_coding	-	-	-	-	-	-	-	1	-	I1L7R9_SOYBN	UPI000233C4F9	-
GLYMA10G01840	10:1341540-1341540	T	downstream_gene_variant	MODIFIER	GLYMA10G01840.1	protein_coding	-	-	-	-	-	-	-	1	-	I1L7R7_SOYBN	UPI00023C924C	-
GLYMA10G01850	10:1341540-1341540	T	upstream_gene_variant	MODIFIER	GLYMA10G01850.1	protein_coding	-	-	-	-	-	-	-	-1	-	I1L7R8_SOYBN	UPI000233C639	-
GLYMA10G01860	10:1341540-1341540	T	upstream_gene_variant	MODIFIER	GLYMA10G01860.1	protein_coding	-	-	-	-	-	-	-	1	-	I1L7R9_SOYBN	UPI000233C4F9	-
GLYMA10G01870	10:1341540-1341540	T	downstream_gene_variant	MODIFIER	GLYMA10G01870.1	protein_coding	-	-	-	-	-	-	-	-1	-	I1L7S0_SOYBN	UPI00023C924E	-
GLYMA10G01840	10:1342718-1342718	A	downstream_gene_variant	MODIFIER	GLYMA10G01840.1	protein_coding	-	-	-	-	-	-	-	1	-	I1L7R7_SOYBN	UPI00023C924C	-
GLYMA10G01850	10:1342718-1342718	A	upstream_gene_variant	MODIFIER	GLYMA10G01850.1	protein_coding	-	-	-	-	-	-	-	-1	-	I1L7R8_SOYBN	UPI000233C639	-
GLYMA10G01860	10:1342718-1342718	A	upstream_gene_variant	MODIFIER	GLYMA10G01860.1	protein_coding	-	-	-	-	-	-	-	1	-	I1L7R9_SOYBN	UPI000233C4F9	-
GLYMA10G01870	10:1342718-1342718	A	downstream_gene_variant	MODIFIER	GLYMA10G01870.1	protein_coding	-	-	-	-	-	-	-	-1	-	I1L7S0_SOYBN	UPI00023C924E	-
GLYMA10G01860	10:1345664-1345664	A	downstream_gene_variant	MODIFIER	GLYMA10G01860.1	protein_coding	-	-	-	-	-	-	-	1	-	I1L7R9_SOYBN	UPI000233C4F9	-
GLYMA10G01870	10:1345664-1345664	A	3_prime_UTR_variant	MODIFIER	GLYMA10G01870.1	protein_coding	GLYMA10G01870.1:c.*80dupT	-	508-509	-	-	-	-	-1	-	I1L7S0_SOYBN	UPI00023C924E	-
GLYMA10G01860	10:1346613-1346613	A	downstream_gene_variant	MODIFIER	GLYMA10G01860.1	protein_coding	-	-	-	-	-	-	-	1	-	I1L7R9_SOYBN	UPI000233C4F9	-
GLYMA10G01870	10:1346613-1346613	A	upstream_gene_variant	MODIFIER	GLYMA10G01870.1	protein_coding	-	-	-	-	-	-	-	-1	-	I1L7S0_SOYBN	UPI00023C924E	-
GLYMA10G01860	10:1347328-1347328	A	downstream_gene_variant	MODIFIER	GLYMA10G01860.1	protein_coding	-	-	-	-	-	-	-	1	-	I1L7R9_SOYBN	UPI000233C4F9	-
GLYMA10G01870	10:1347328-1347328	A	upstream_gene_variant	MODIFIER	GLYMA10G01870.1	protein_coding	-	-	-	-	-	-	-	-1	-	I1L7S0_SOYBN	UPI00023C924E	-
GLYMA10G01870	10:1350363-1350363	TT	upstream_gene_variant	MODIFIER	GLYMA10G01870.1	protein_coding	-	-	-	-	-	-	-	-1	-	I1L7S0_SOYBN	UPI00023C924E	-
GLYMA10G01890	10:1350363-1350363	TT	downstream_gene_variant	MODIFIER	GLYMA10G01890.2	protein_coding	-	-	-	-	-	-	-	-1	-	K7LGV3_SOYBN	UPI000233C63E	-
GLYMA10G01890	10:1350363-1350363	TT	downstream_gene_variant	MODIFIER	GLYMA10G01890.3	protein_coding	-	-	-	-	-	-	-	-1	-	K7LGV4_SOYBN	UPI00029675F5	-
GLYMA10G01870	10:1350998-1350998	AT	upstream_gene_variant	MODIFIER	GLYMA10G01870.1	protein_coding	-	-	-	-	-	-	-	-1	-	I1L7S0_SOYBN	UPI00023C924E	-
GLYMA10G01890	10:1350998-1350998	AT	downstream_gene_variant	MODIFIER	GLYMA10G01890.2	protein_coding	-	-	-	-	-	-	-	-1	-	K7LGV3_SOYBN	UPI000233C63E	-
GLYMA10G01890	10:1350998-1350998	AT	downstream_gene_variant	MODIFIER	GLYMA10G01890.3	protein_coding	-	-	-	-	-	-	-	-1	-	K7LGV4_SOYBN	UPI00029675F5	-
GLYMA10G01890	10:1351608-1351608	TTC	downstream_gene_variant	MODIFIER	GLYMA10G01890.2	protein_coding	-	-	-	-	-	-	-	-1	-	K7LGV3_SOYBN	UPI000233C63E	-
GLYMA10G01890	10:1351608-1351608	TTC	downstream_gene_variant	MODIFIER	GLYMA10G01890.3	protein_coding	-	-	-	-	-	-	-	-1	-	K7LGV4_SOYBN	UPI00029675F5	-
GLYMA10G01890	10:1351963-1351963	AG	downstream_gene_variant	MODIFIER	GLYMA10G01890.2	protein_coding	-	-	-	-	-	-	-	-1	-	K7LGV3_SOYBN	UPI000233C63E	-
GLYMA10G01890	10:1351963-1351963	AG	downstream_gene_variant	MODIFIER	GLYMA10G01890.3	protein_coding	-	-	-	-	-	-	-	-1	-	K7LGV4_SOYBN	UPI00029675F5	-
GLYMA10G01890	10:1354613-1354613	TG	intron_variant	MODIFIER	GLYMA10G01890.2	protein_coding	GLYMA10G01890.2:c.1185+479_1185+480dupCA	-	-	-	-	-	-	-1	-	K7LGV3_SOYBN	UPI000233C63E	-
GLYMA10G01890	10:1354613-1354613	TG	intron_variant	MODIFIER	GLYMA10G01890.3	protein_coding	GLYMA10G01890.3:c.*59+479_*59+480dupCA	-	-	-	-	-	-	-1	-	K7LGV4_SOYBN	UPI00029675F5	-
GLYMA10G01890	10:1362275-1362277	-	upstream_gene_variant	MODIFIER	GLYMA10G01890.2	protein_coding	-	-	-	-	-	-	-	-1	-	K7LGV3_SOYBN	UPI000233C63E	-
GLYMA10G01890	10:1362275-1362277	-	upstream_gene_variant	MODIFIER	GLYMA10G01890.3	protein_coding	-	-	-	-	-	-	-	-1	-	K7LGV4_SOYBN	UPI00029675F5	-
GLYMA10G01901	10:1362275-1362277	-	intron_variant	MODIFIER	GLYMA10G01901.1	protein_coding	GLYMA10G01901.1:c.289-124_289-123delCT	-	-	-	-	-	-	-1	-	K7LGV5_SOYBN	UPI000294C3A5	-
GLYMA10G01910	10:1362275-1362277	-	upstream_gene_variant	MODIFIER	GLYMA10G01910.2	protein_coding	-	-	-	-	-	-	-	1	-	K7LGV6_SOYBN	UPI00029596EC	-
GLYMA10G01901	10:1368936-1368936	T	upstream_gene_variant	MODIFIER	GLYMA10G01901.1	protein_coding	-	-	-	-	-	-	-	-1	-	K7LGV5_SOYBN	UPI000294C3A5	-
GLYMA10G01910	10:1368936-1368936	T	downstream_gene_variant	MODIFIER	GLYMA10G01910.2	protein_coding	-	-	-	-	-	-	-	1	-	K7LGV6_SOYBN	UPI00029596EC	-
GLYMA10G01925	10:1368936-1368936	T	upstream_gene_variant	MODIFIER	GLYMA10G01925.1	protein_coding	-	-	-	-	-	-	-	1	-	K7LGV7_SOYBN	UPI00023C93CE	-
GLYMA10G01940	10:1368936-1368936	T	upstream_gene_variant	MODIFIER	GLYMA10G01940.2	protein_coding	-	-	-	-	-	-	-	1	-	K7LGV8_SOYBN	UPI000296CA4C	-
GLYMA10G01910	10:1370858-1370858	TTAATATTTAATTT	downstream_gene_variant	MODIFIER	GLYMA10G01910.2	protein_coding	-	-	-	-	-	-	-	1	-	K7LGV6_SOYBN	UPI00029596EC	-
GLYMA10G01925	10:1370858-1370858	TTAATATTTAATTT	downstream_gene_variant	MODIFIER	GLYMA10G01925.1	protein_coding	-	-	-	-	-	-	-	1	-	K7LGV7_SOYBN	UPI00023C93CE	-
GLYMA10G01940	10:1370858-1370858	TTAATATTTAATTT	upstream_gene_variant	MODIFIER	GLYMA10G01940.2	protein_coding	-	-	-	-	-	-	-	1	-	K7LGV8_SOYBN	UPI000296CA4C	-
GLYMA10G01910	10:1370860-1370860	TA	downstream_gene_variant	MODIFIER	GLYMA10G01910.2	protein_coding	-	-	-	-	-	-	-	1	-	K7LGV6_SOYBN	UPI00029596EC	-
GLYMA10G01925	10:1370860-1370860	TA	downstream_gene_variant	MODIFIER	GLYMA10G01925.1	protein_coding	-	-	-	-	-	-	-	1	-	K7LGV7_SOYBN	UPI00023C93CE	-
GLYMA10G01940	10:1370860-1370860	TA	upstream_gene_variant	MODIFIER	GLYMA10G01940.2	protein_coding	-	-	-	-	-	-	-	1	-	K7LGV8_SOYBN	UPI000296CA4C	-
GLYMA10G01910	10:1371256-1371256	AAT	downstream_gene_variant	MODIFIER	GLYMA10G01910.2	protein_coding	-	-	-	-	-	-	-	1	-	K7LGV6_SOYBN	UPI00029596EC	-
GLYMA10G01925	10:1371256-1371256	AAT	downstream_gene_variant	MODIFIER	GLYMA10G01925.1	protein_coding	-	-	-	-	-	-	-	1	-	K7LGV7_SOYBN	UPI00023C93CE	-
GLYMA10G01940	10:1371256-1371256	AAT	upstream_gene_variant	MODIFIER	GLYMA10G01940.2	protein_coding	-	-	-	-	-	-	-	1	-	K7LGV8_SOYBN	UPI000296CA4C	-
GLYMA10G01910	10:1371616-1371616	A	downstream_gene_variant	MODIFIER	GLYMA10G01910.2	protein_coding	-	-	-	-	-	-	-	1	-	K7LGV6_SOYBN	UPI00029596EC	-
GLYMA10G01925	10:1371616-1371616	A	downstream_gene_variant	MODIFIER	GLYMA10G01925.1	protein_coding	-	-	-	-	-	-	-	1	-	K7LGV7_SOYBN	UPI00023C93CE	-
GLYMA10G01940	10:1371616-1371616	A	upstream_gene_variant	MODIFIER	GLYMA10G01940.2	protein_coding	-	-	-	-	-	-	-	1	-	K7LGV8_SOYBN	UPI000296CA4C	-
GLYMA10G01925	10:1372447-1372447	G	downstream_gene_variant	MODIFIER	GLYMA10G01925.1	protein_coding	-	-	-	-	-	-	-	1	-	K7LGV7_SOYBN	UPI00023C93CE	-
GLYMA10G01940	10:1372447-1372447	G	upstream_gene_variant	MODIFIER	GLYMA10G01940.2	protein_coding	-	-	-	-	-	-	-	1	-	K7LGV8_SOYBN	UPI000296CA4C	-
GLYMA10G01925	10:1374143-1374143	T	downstream_gene_variant	MODIFIER	GLYMA10G01925.1	protein_coding	-	-	-	-	-	-	-	1	-	K7LGV7_SOYBN	UPI00023C93CE	-
GLYMA10G01940	10:1374143-1374143	T	intron_variant	MODIFIER	GLYMA10G01940.2	protein_coding	GLYMA10G01940.2:c.64-47dupT	-	-	-	-	-	-	1	-	K7LGV8_SOYBN	UPI000296CA4C	-
GLYMA10G01950	10:1374143-1374143	T	upstream_gene_variant	MODIFIER	GLYMA10G01950.1	protein_coding	-	-	-	-	-	-	-	1	-	I1L7S5_SOYBN	UPI000233C645	-
GLYMA10G01940	10:1374809-1374809	T	3_prime_UTR_variant	MODIFIER	GLYMA10G01940.2	protein_coding	GLYMA10G01940.2:c.*224dupT	-	679-680	-	-	-	-	1	-	K7LGV8_SOYBN	UPI000296CA4C	-
GLYMA10G01950	10:1374809-1374809	T	upstream_gene_variant	MODIFIER	GLYMA10G01950.1	protein_coding	-	-	-	-	-	-	-	1	-	I1L7S5_SOYBN	UPI000233C645	-
GLYMA10G01940	10:1376612-1376612	TA	downstream_gene_variant	MODIFIER	GLYMA10G01940.2	protein_coding	-	-	-	-	-	-	-	1	-	K7LGV8_SOYBN	UPI000296CA4C	-
GLYMA10G01950	10:1376612-1376612	TA	upstream_gene_variant	MODIFIER	GLYMA10G01950.1	protein_coding	-	-	-	-	-	-	-	1	-	I1L7S5_SOYBN	UPI000233C645	-
GLYMA10G01940	10:1379340-1379340	A	downstream_gene_variant	MODIFIER	GLYMA10G01940.2	protein_coding	-	-	-	-	-	-	-	1	-	K7LGV8_SOYBN	UPI000296CA4C	-
GLYMA10G01950	10:1379340-1379340	A	downstream_gene_variant	MODIFIER	GLYMA10G01950.1	protein_coding	-	-	-	-	-	-	-	1	-	I1L7S5_SOYBN	UPI000233C645	-
GLYMA10G01950	10:1380617-1380617	T	downstream_gene_variant	MODIFIER	GLYMA10G01950.1	protein_coding	-	-	-	-	-	-	-	1	-	I1L7S5_SOYBN	UPI000233C645	-
GLYMA10G01950	10:1382021-1382021	A	downstream_gene_variant	MODIFIER	GLYMA10G01950.1	protein_coding	-	-	-	-	-	-	-	1	-	I1L7S5_SOYBN	UPI000233C645	-
GLYMA10G01950	10:1383547-1383551	-	downstream_gene_variant	MODIFIER	GLYMA10G01950.1	protein_coding	-	-	-	-	-	-	-	1	-	I1L7S5_SOYBN	UPI000233C645	-
GLYMA10G01950	10:1383556-1383556	G	downstream_gene_variant	MODIFIER	GLYMA10G01950.1	protein_coding	-	-	-	-	-	-	-	1	-	I1L7S5_SOYBN	UPI000233C645	-
GLYMA10G01950	10:1383644-1383647	-	downstream_gene_variant	MODIFIER	GLYMA10G01950.1	protein_coding	-	-	-	-	-	-	-	1	-	I1L7S5_SOYBN	UPI000233C645	-
-	10:1386473-1386473	A	intergenic_variant	MODIFIER	-	-	-	-	-	-	-	-	-	-	-	-	-	-
-	10:1386630-1386633	-	intergenic_variant	MODIFIER	-	-	-	-	-	-	-	-	-	-	-	-	-	-
-	10:1388726-1388726	T	intergenic_variant	MODIFIER	-	-	-	-	-	-	-	-	-	-	-	-	-	-
-	10:1389936-1389936	T	intergenic_variant	MODIFIER	-	-	-	-	-	-	-	-	-	-	-	-	-	-
-	10:1390186-1390186	A	intergenic_variant	MODIFIER	-	-	-	-	-	-	-	-	-	-	-	-	-	-
-	10:1390344-1390354	-	intergenic_variant	MODIFIER	-	-	-	-	-	-	-	-	-	-	-	-	-	-
GLYMA10G01960	10:1392634-1392634	T	upstream_gene_variant	MODIFIER	GLYMA10G01960.1	protein_coding	-	-	-	-	-	-	-	1	-	I1L7S6_SOYBN	UPI000233C648	-
GLYMA10G01960	10:1394061-1394061	T	upstream_gene_variant	MODIFIER	GLYMA10G01960.1	protein_coding	-	-	-	-	-	-	-	1	-	I1L7S6_SOYBN	UPI000233C648	-
GLYMA10G01960	10:1397134-1397134	T	5_prime_UTR_variant	MODIFIER	GLYMA10G01960.1	protein_coding	GLYMA10G01960.1:c.-330dupT	-	114-115	-	-	-	-	1	-	I1L7S6_SOYBN	UPI000233C648	-
GLYMA10G01960	10:1398796-1398796	T	downstream_gene_variant	MODIFIER	GLYMA10G01960.1	protein_coding	-	-	-	-	-	-	-	1	-	I1L7S6_SOYBN	UPI000233C648	-
GLYMA10G01960	10:1402194-1402194	TAGTGTG	downstream_gene_variant	MODIFIER	GLYMA10G01960.1	protein_coding	-	-	-	-	-	-	-	1	-	I1L7S6_SOYBN	UPI000233C648	-
-	10:1406313-1406313	T	intergenic_variant	MODIFIER	-	-	-	-	-	-	-	-	-	-	-	-	-	-
-	10:1413925-1413925	A	intergenic_variant	MODIFIER	-	-	-	-	-	-	-	-	-	-	-	-	-	-
-	10:1419199-1419199	A	intergenic_variant	MODIFIER	-	-	-	-	-	-	-	-	-	-	-	-	-	-
GLYMA10G02020	10:1428041-1428041	AA	upstream_gene_variant	MODIFIER	GLYMA10G02020.1	protein_coding	-	-	-	-	-	-	-	1	-	I1L7S7_SOYBN	UPI000294B4E7	-
GLYMA10G02020	10:1428041-1428041	AA	upstream_gene_variant	MODIFIER	GLYMA10G02020.2	protein_coding	-	-	-	-	-	-	-	1	-	K7LGV9_SOYBN	UPI0002957653	-
GLYMA10G02020	10:1429855-1429855	T	upstream_gene_variant	MODIFIER	GLYMA10G02020.1	protein_coding	-	-	-	-	-	-	-	1	-	I1L7S7_SOYBN	UPI000294B4E7	-
GLYMA10G02020	10:1429855-1429855	T	upstream_gene_variant	MODIFIER	GLYMA10G02020.2	protein_coding	-	-	-	-	-	-	-	1	-	K7LGV9_SOYBN	UPI0002957653	-
GLYMA10G02020	10:1429968-1429968	AGTTAACAAA	upstream_gene_variant	MODIFIER	GLYMA10G02020.1	protein_coding	-	-	-	-	-	-	-	1	-	I1L7S7_SOYBN	UPI000294B4E7	-
GLYMA10G02020	10:1429968-1429968	AGTTAACAAA	upstream_gene_variant	MODIFIER	GLYMA10G02020.2	protein_coding	-	-	-	-	-	-	-	1	-	K7LGV9_SOYBN	UPI0002957653	-
GLYMA10G02020	10:1431725-1431725	AAATTC	upstream_gene_variant	MODIFIER	GLYMA10G02020.1	protein_coding	-	-	-	-	-	-	-	1	-	I1L7S7_SOYBN	UPI000294B4E7	-
GLYMA10G02020	10:1431725-1431725	AAATTC	upstream_gene_variant	MODIFIER	GLYMA10G02020.2	protein_coding	-	-	-	-	-	-	-	1	-	K7LGV9_SOYBN	UPI0002957653	-
GLYMA10G02020	10:1439667-1439667	AA	downstream_gene_variant	MODIFIER	GLYMA10G02020.1	protein_coding	-	-	-	-	-	-	-	1	-	I1L7S7_SOYBN	UPI000294B4E7	-
GLYMA10G02020	10:1439667-1439667	AA	downstream_gene_variant	MODIFIER	GLYMA10G02020.2	protein_coding	-	-	-	-	-	-	-	1	-	K7LGV9_SOYBN	UPI0002957653	-
GLYMA10G02030	10:1439667-1439667	AA	downstream_gene_variant	MODIFIER	GLYMA10G02030.1	protein_coding	-	-	-	-	-	-	-	-1	-	I1L7S8_SOYBN	UPI00023C93D7	-
GLYMA10G02030	10:1439667-1439667	AA	downstream_gene_variant	MODIFIER	GLYMA10G02030.2	protein_coding	-	-	-	-	-	-	-	-1	-	K7LGW0_SOYBN	UPI0002949F9E	-
GLYMA10G02020	10:1440573-1440573	A	downstream_gene_variant	MODIFIER	GLYMA10G02020.1	protein_coding	-	-	-	-	-	-	-	1	-	I1L7S7_SOYBN	UPI000294B4E7	-
GLYMA10G02020	10:1440573-1440573	A	downstream_gene_variant	MODIFIER	GLYMA10G02020.2	protein_coding	-	-	-	-	-	-	-	1	-	K7LGV9_SOYBN	UPI0002957653	-
GLYMA10G02030	10:1440573-1440573	A	downstream_gene_variant	MODIFIER	GLYMA10G02030.1	protein_coding	-	-	-	-	-	-	-	-1	-	I1L7S8_SOYBN	UPI00023C93D7	-
GLYMA10G02030	10:1440573-1440573	A	downstream_gene_variant	MODIFIER	GLYMA10G02030.2	protein_coding	-	-	-	-	-	-	-	-1	-	K7LGW0_SOYBN	UPI0002949F9E	-
GLYMA10G02020	10:1441442-1441442	A	downstream_gene_variant	MODIFIER	GLYMA10G02020.1	protein_coding	-	-	-	-	-	-	-	1	-	I1L7S7_SOYBN	UPI000294B4E7	-
GLYMA10G02020	10:1441442-1441442	A	downstream_gene_variant	MODIFIER	GLYMA10G02020.2	protein_coding	-	-	-	-	-	-	-	1	-	K7LGV9_SOYBN	UPI0002957653	-
GLYMA10G02030	10:1441442-1441442	A	downstream_gene_variant	MODIFIER	GLYMA10G02030.1	protein_coding	-	-	-	-	-	-	-	-1	-	I1L7S8_SOYBN	UPI00023C93D7	-
GLYMA10G02030	10:1441442-1441442	A	downstream_gene_variant	MODIFIER	GLYMA10G02030.2	protein_coding	-	-	-	-	-	-	-	-1	-	K7LGW0_SOYBN	UPI0002949F9E	-
GLYMA10G02020	10:1441851-1441851	A	downstream_gene_variant	MODIFIER	GLYMA10G02020.1	protein_coding	-	-	-	-	-	-	-	1	-	I1L7S7_SOYBN	UPI000294B4E7	-
GLYMA10G02020	10:1441851-1441851	A	downstream_gene_variant	MODIFIER	GLYMA10G02020.2	protein_coding	-	-	-	-	-	-	-	1	-	K7LGV9_SOYBN	UPI0002957653	-
GLYMA10G02030	10:1441851-1441851	A	downstream_gene_variant	MODIFIER	GLYMA10G02030.1	protein_coding	-	-	-	-	-	-	-	-1	-	I1L7S8_SOYBN	UPI00023C93D7	-
GLYMA10G02030	10:1441851-1441851	A	downstream_gene_variant	MODIFIER	GLYMA10G02030.2	protein_coding	-	-	-	-	-	-	-	-1	-	K7LGW0_SOYBN	UPI0002949F9E	-
GLYMA10G02020	10:1443041-1443041	A	downstream_gene_variant	MODIFIER	GLYMA10G02020.1	protein_coding	-	-	-	-	-	-	-	1	-	I1L7S7_SOYBN	UPI000294B4E7	-
GLYMA10G02020	10:1443041-1443041	A	downstream_gene_variant	MODIFIER	GLYMA10G02020.2	protein_coding	-	-	-	-	-	-	-	1	-	K7LGV9_SOYBN	UPI0002957653	-
GLYMA10G02030	10:1443041-1443041	A	downstream_gene_variant	MODIFIER	GLYMA10G02030.1	protein_coding	-	-	-	-	-	-	-	-1	-	I1L7S8_SOYBN	UPI00023C93D7	-
GLYMA10G02030	10:1443041-1443041	A	downstream_gene_variant	MODIFIER	GLYMA10G02030.2	protein_coding	-	-	-	-	-	-	-	-1	-	K7LGW0_SOYBN	UPI0002949F9E	-
GLYMA10G02020	10:1443306-1443306	TT	downstream_gene_variant	MODIFIER	GLYMA10G02020.1	protein_coding	-	-	-	-	-	-	-	1	-	I1L7S7_SOYBN	UPI000294B4E7	-
GLYMA10G02020	10:1443306-1443306	TT	downstream_gene_variant	MODIFIER	GLYMA10G02020.2	protein_coding	-	-	-	-	-	-	-	1	-	K7LGV9_SOYBN	UPI0002957653	-
GLYMA10G02030	10:1443306-1443306	TT	downstream_gene_variant	MODIFIER	GLYMA10G02030.1	protein_coding	-	-	-	-	-	-	-	-1	-	I1L7S8_SOYBN	UPI00023C93D7	-
GLYMA10G02030	10:1443306-1443306	TT	downstream_gene_variant	MODIFIER	GLYMA10G02030.2	protein_coding	-	-	-	-	-	-	-	-1	-	K7LGW0_SOYBN	UPI0002949F9E	-
GLYMA10G02030	10:1448419-1448419	G	intron_variant	MODIFIER	GLYMA10G02030.1	protein_coding	GLYMA10G02030.1:c.12+136dupC	-	-	-	-	-	-	-1	-	I1L7S8_SOYBN	UPI00023C93D7	-
GLYMA10G02030	10:1448419-1448419	G	intron_variant	MODIFIER	GLYMA10G02030.2	protein_coding	GLYMA10G02030.2:c.-337+132dupC	-	-	-	-	-	-	-1	-	K7LGW0_SOYBN	UPI0002949F9E	-
GLYMA10G02030	10:1448443-1448444	-	intron_variant	MODIFIER	GLYMA10G02030.1	protein_coding	GLYMA10G02030.1:c.12+112delT	-	-	-	-	-	-	-1	-	I1L7S8_SOYBN	UPI00023C93D7	-
GLYMA10G02030	10:1448443-1448444	-	intron_variant	MODIFIER	GLYMA10G02030.2	protein_coding	GLYMA10G02030.2:c.-337+108delT	-	-	-	-	-	-	-1	-	K7LGW0_SOYBN	UPI0002949F9E	-
GLYMA10G02030	10:1448483-1448494	-	intron_variant	MODIFIER	GLYMA10G02030.1	protein_coding	GLYMA10G02030.1:c.12+62_12+72delGTTGTTTTGTT	-	-	-	-	-	-	-1	-	I1L7S8_SOYBN	UPI00023C93D7	-
GLYMA10G02030	10:1448483-1448494	-	intron_variant	MODIFIER	GLYMA10G02030.2	protein_coding	GLYMA10G02030.2:c.-337+58_-337+68delGTTGTTTTGTT	-	-	-	-	-	-	-1	-	K7LGW0_SOYBN	UPI0002949F9E	-
GLYMA10G02030	10:1448945-1448945	AAA	upstream_gene_variant	MODIFIER	GLYMA10G02030.1	protein_coding	-	-	-	-	-	-	-	-1	-	I1L7S8_SOYBN	UPI00023C93D7	-
GLYMA10G02030	10:1448945-1448945	AAA	upstream_gene_variant	MODIFIER	GLYMA10G02030.2	protein_coding	-	-	-	-	-	-	-	-1	-	K7LGW0_SOYBN	UPI0002949F9E	-
GLYMA10G02040	10:1448945-1448945	AAA	upstream_gene_variant	MODIFIER	GLYMA10G02040.3	protein_coding	-	-	-	-	-	-	-	1	-	K7LGW1_SOYBN	UPI00023C93D9	-
GLYMA10G02040	10:1448945-1448945	AAA	upstream_gene_variant	MODIFIER	GLYMA10G02040.4	protein_coding	-	-	-	-	-	-	-	1	-	K7LGW2_SOYBN	UPI0002966360	-
GLYMA10G02030	10:1450096-1450096	T	upstream_gene_variant	MODIFIER	GLYMA10G02030.1	protein_coding	-	-	-	-	-	-	-	-1	-	I1L7S8_SOYBN	UPI00023C93D7	-
GLYMA10G02030	10:1450096-1450096	T	upstream_gene_variant	MODIFIER	GLYMA10G02030.2	protein_coding	-	-	-	-	-	-	-	-1	-	K7LGW0_SOYBN	UPI0002949F9E	-
GLYMA10G02040	10:1450096-1450096	T	upstream_gene_variant	MODIFIER	GLYMA10G02040.3	protein_coding	-	-	-	-	-	-	-	1	-	K7LGW1_SOYBN	UPI00023C93D9	-
GLYMA10G02040	10:1450096-1450096	T	upstream_gene_variant	MODIFIER	GLYMA10G02040.4	protein_coding	-	-	-	-	-	-	-	1	-	K7LGW2_SOYBN	UPI0002966360	-
GLYMA10G02030	10:1450180-1450181	-	upstream_gene_variant	MODIFIER	GLYMA10G02030.1	protein_coding	-	-	-	-	-	-	-	-1	-	I1L7S8_SOYBN	UPI00023C93D7	-
GLYMA10G02030	10:1450180-1450181	-	upstream_gene_variant	MODIFIER	GLYMA10G02030.2	protein_coding	-	-	-	-	-	-	-	-1	-	K7LGW0_SOYBN	UPI0002949F9E	-
GLYMA10G02040	10:1450180-1450181	-	upstream_gene_variant	MODIFIER	GLYMA10G02040.3	protein_coding	-	-	-	-	-	-	-	1	-	K7LGW1_SOYBN	UPI00023C93D9	-
GLYMA10G02040	10:1450180-1450181	-	upstream_gene_variant	MODIFIER	GLYMA10G02040.4	protein_coding	-	-	-	-	-	-	-	1	-	K7LGW2_SOYBN	UPI0002966360	-
GLYMA10G02030	10:1453576-1453576	A	upstream_gene_variant	MODIFIER	GLYMA10G02030.1	protein_coding	-	-	-	-	-	-	-	-1	-	I1L7S8_SOYBN	UPI00023C93D7	-
GLYMA10G02030	10:1453576-1453576	A	upstream_gene_variant	MODIFIER	GLYMA10G02030.2	protein_coding	-	-	-	-	-	-	-	-1	-	K7LGW0_SOYBN	UPI0002949F9E	-
GLYMA10G02040	10:1453576-1453576	A	upstream_gene_variant	MODIFIER	GLYMA10G02040.3	protein_coding	-	-	-	-	-	-	-	1	-	K7LGW1_SOYBN	UPI00023C93D9	-
GLYMA10G02040	10:1453576-1453576	A	upstream_gene_variant	MODIFIER	GLYMA10G02040.4	protein_coding	-	-	-	-	-	-	-	1	-	K7LGW2_SOYBN	UPI0002966360	-
GLYMA10G02040	10:1454792-1454792	TTATAT	intron_variant	MODIFIER	GLYMA10G02040.3	protein_coding	GLYMA10G02040.3:c.-46+337_-46+342dupTATTTA	-	-	-	-	-	-	1	-	K7LGW1_SOYBN	UPI00023C93D9	-
GLYMA10G02040	10:1454792-1454792	TTATAT	intron_variant	MODIFIER	GLYMA10G02040.4	protein_coding	GLYMA10G02040.4:c.-46+337_-46+342dupTATTTA	-	-	-	-	-	-	1	-	K7LGW2_SOYBN	UPI0002966360	-
GLYMA10G02040	10:1460997-1460997	T	downstream_gene_variant	MODIFIER	GLYMA10G02040.3	protein_coding	-	-	-	-	-	-	-	1	-	K7LGW1_SOYBN	UPI00023C93D9	-
GLYMA10G02040	10:1460997-1460997	T	downstream_gene_variant	MODIFIER	GLYMA10G02040.4	protein_coding	-	-	-	-	-	-	-	1	-	K7LGW2_SOYBN	UPI0002966360	-
GLYMA10G02050	10:1460997-1460997	T	downstream_gene_variant	MODIFIER	GLYMA10G02050.1	protein_coding	-	-	-	-	-	-	-	-1	-	C6SXR2_SOYBN	UPI0001B15417	-
GLYMA10G02040	10:1461325-1461326	-	downstream_gene_variant	MODIFIER	GLYMA10G02040.3	protein_coding	-	-	-	-	-	-	-	1	-	K7LGW1_SOYBN	UPI00023C93D9	-
GLYMA10G02040	10:1461325-1461326	-	downstream_gene_variant	MODIFIER	GLYMA10G02040.4	protein_coding	-	-	-	-	-	-	-	1	-	K7LGW2_SOYBN	UPI0002966360	-
GLYMA10G02050	10:1461325-1461326	-	downstream_gene_variant	MODIFIER	GLYMA10G02050.1	protein_coding	-	-	-	-	-	-	-	-1	-	C6SXR2_SOYBN	UPI0001B15417	-
GLYMA10G02040	10:1461688-1461688	ATATATATATATATAT	downstream_gene_variant	MODIFIER	GLYMA10G02040.3	protein_coding	-	-	-	-	-	-	-	1	-	K7LGW1_SOYBN	UPI00023C93D9	-
GLYMA10G02040	10:1461688-1461688	ATATATATATATATAT	downstream_gene_variant	MODIFIER	GLYMA10G02040.4	protein_coding	-	-	-	-	-	-	-	1	-	K7LGW2_SOYBN	UPI0002966360	-
GLYMA10G02050	10:1461688-1461688	ATATATATATATATAT	downstream_gene_variant	MODIFIER	GLYMA10G02050.1	protein_coding	-	-	-	-	-	-	-	-1	-	C6SXR2_SOYBN	UPI0001B15417	-
GLYMA10G02060	10:1461688-1461688	ATATATATATATATAT	downstream_gene_variant	MODIFIER	GLYMA10G02060.1	protein_coding	-	-	-	-	-	-	-	-1	-	C6SY65_SOYBN	UPI0001B1568D	-
GLYMA10G02040	10:1465140-1465140	ATA	downstream_gene_variant	MODIFIER	GLYMA10G02040.3	protein_coding	-	-	-	-	-	-	-	1	-	K7LGW1_SOYBN	UPI00023C93D9	-
GLYMA10G02040	10:1465140-1465140	ATA	downstream_gene_variant	MODIFIER	GLYMA10G02040.4	protein_coding	-	-	-	-	-	-	-	1	-	K7LGW2_SOYBN	UPI0002966360	-
GLYMA10G02050	10:1465140-1465140	ATA	upstream_gene_variant	MODIFIER	GLYMA10G02050.1	protein_coding	-	-	-	-	-	-	-	-1	-	C6SXR2_SOYBN	UPI0001B15417	-
GLYMA10G02060	10:1465140-1465140	ATA	downstream_gene_variant	MODIFIER	GLYMA10G02060.1	protein_coding	-	-	-	-	-	-	-	-1	-	C6SY65_SOYBN	UPI0001B1568D	-
GLYMA10G02050	10:1467184-1467184	A	upstream_gene_variant	MODIFIER	GLYMA10G02050.1	protein_coding	-	-	-	-	-	-	-	-1	-	C6SXR2_SOYBN	UPI0001B15417	-
GLYMA10G02060	10:1467184-1467184	A	intron_variant	MODIFIER	GLYMA10G02060.1	protein_coding	GLYMA10G02060.1:c.614+24dupT	-	-	-	-	-	-	-1	-	C6SY65_SOYBN	UPI0001B1568D	-
GLYMA10G02080	10:1467184-1467184	A	downstream_gene_variant	MODIFIER	GLYMA10G02080.1	protein_coding	-	-	-	-	-	-	-	-1	-	C6TJ94_SOYBN	UPI0001B165B8	-
GLYMA10G02050	10:1468505-1468505	AAA	upstream_gene_variant	MODIFIER	GLYMA10G02050.1	protein_coding	-	-	-	-	-	-	-	-1	-	C6SXR2_SOYBN	UPI0001B15417	-
GLYMA10G02060	10:1468505-1468505	AAA	intron_variant	MODIFIER	GLYMA10G02060.1	protein_coding	GLYMA10G02060.1:c.112+29_112+31dupTTT	-	-	-	-	-	-	-1	-	C6SY65_SOYBN	UPI0001B1568D	-
GLYMA10G02080	10:1468505-1468505	AAA	downstream_gene_variant	MODIFIER	GLYMA10G02080.1	protein_coding	-	-	-	-	-	-	-	-1	-	C6TJ94_SOYBN	UPI0001B165B8	-
GLYMA10G02050	10:1468902-1468902	A	upstream_gene_variant	MODIFIER	GLYMA10G02050.1	protein_coding	-	-	-	-	-	-	-	-1	-	C6SXR2_SOYBN	UPI0001B15417	-
GLYMA10G02060	10:1468902-1468902	A	5_prime_UTR_variant	MODIFIER	GLYMA10G02060.1	protein_coding	GLYMA10G02060.1:c.-255dupT	-	1143-1144	-	-	-	-	-1	-	C6SY65_SOYBN	UPI0001B1568D	-
GLYMA10G02080	10:1468902-1468902	A	downstream_gene_variant	MODIFIER	GLYMA10G02080.1	protein_coding	-	-	-	-	-	-	-	-1	-	C6TJ94_SOYBN	UPI0001B165B8	-
GLYMA10G02060	10:1471151-1471153	-	upstream_gene_variant	MODIFIER	GLYMA10G02060.1	protein_coding	-	-	-	-	-	-	-	-1	-	C6SY65_SOYBN	UPI0001B1568D	-
GLYMA10G02080	10:1471151-1471153	-	3_prime_UTR_variant	MODIFIER	GLYMA10G02080.1	protein_coding	GLYMA10G02080.1:c.*171_*172delTT	-	1624-1625	-	-	-	-	-1	-	C6TJ94_SOYBN	UPI0001B165B8	-
GLYMA10G02060	10:1472938-1472940	-	upstream_gene_variant	MODIFIER	GLYMA10G02060.1	protein_coding	-	-	-	-	-	-	-	-1	-	C6SY65_SOYBN	UPI0001B1568D	-
GLYMA10G02080	10:1472938-1472940	-	upstream_gene_variant	MODIFIER	GLYMA10G02080.1	protein_coding	-	-	-	-	-	-	-	-1	-	C6TJ94_SOYBN	UPI0001B165B8	-
GLYMA10G02090	10:1472938-1472940	-	upstream_gene_variant	MODIFIER	GLYMA10G02090.2	protein_coding	-	-	-	-	-	-	-	1	-	C6T5T7_SOYBN	UPI0001B15F76	-
GLYMA10G02060	10:1474797-1474797	AA	upstream_gene_variant	MODIFIER	GLYMA10G02060.1	protein_coding	-	-	-	-	-	-	-	-1	-	C6SY65_SOYBN	UPI0001B1568D	-
GLYMA10G02080	10:1474797-1474797	AA	upstream_gene_variant	MODIFIER	GLYMA10G02080.1	protein_coding	-	-	-	-	-	-	-	-1	-	C6TJ94_SOYBN	UPI0001B165B8	-
GLYMA10G02090	10:1474797-1474797	AA	upstream_gene_variant	MODIFIER	GLYMA10G02090.2	protein_coding	-	-	-	-	-	-	-	1	-	C6T5T7_SOYBN	UPI0001B15F76	-
GLYMA10G02080	10:1475834-1475834	TT	upstream_gene_variant	MODIFIER	GLYMA10G02080.1	protein_coding	-	-	-	-	-	-	-	-1	-	C6TJ94_SOYBN	UPI0001B165B8	-
GLYMA10G02090	10:1475834-1475834	TT	upstream_gene_variant	MODIFIER	GLYMA10G02090.2	protein_coding	-	-	-	-	-	-	-	1	-	C6T5T7_SOYBN	UPI0001B15F76	-
GLYMA10G02100	10:1475834-1475834	TT	upstream_gene_variant	MODIFIER	GLYMA10G02100.1	protein_coding	-	-	-	-	-	-	-	1	-	I1L7T5_SOYBN	UPI000233C7DC	-
GLYMA10G02080	10:1476507-1476507	A	upstream_gene_variant	MODIFIER	GLYMA10G02080.1	protein_coding	-	-	-	-	-	-	-	-1	-	C6TJ94_SOYBN	UPI0001B165B8	-
GLYMA10G02090	10:1476507-1476507	A	upstream_gene_variant	MODIFIER	GLYMA10G02090.2	protein_coding	-	-	-	-	-	-	-	1	-	C6T5T7_SOYBN	UPI0001B15F76	-
GLYMA10G02100	10:1476507-1476507	A	upstream_gene_variant	MODIFIER	GLYMA10G02100.1	protein_coding	-	-	-	-	-	-	-	1	-	I1L7T5_SOYBN	UPI000233C7DC	-
GLYMA10G02090	10:1477898-1477898	A	intron_variant	MODIFIER	GLYMA10G02090.2	protein_coding	GLYMA10G02090.2:c.281-145dupA	-	-	-	-	-	-	1	-	C6T5T7_SOYBN	UPI0001B15F76	-
GLYMA10G02100	10:1477898-1477898	A	upstream_gene_variant	MODIFIER	GLYMA10G02100.1	protein_coding	-	-	-	-	-	-	-	1	-	I1L7T5_SOYBN	UPI000233C7DC	-
GLYMA10G02090	10:1477972-1477976	-	intron_variant	MODIFIER	GLYMA10G02090.2	protein_coding	GLYMA10G02090.2:c.281-73_281-70delTTAT	-	-	-	-	-	-	1	-	C6T5T7_SOYBN	UPI0001B15F76	-
GLYMA10G02100	10:1477972-1477976	-	upstream_gene_variant	MODIFIER	GLYMA10G02100.1	protein_coding	-	-	-	-	-	-	-	1	-	I1L7T5_SOYBN	UPI000233C7DC	-
GLYMA10G02090	10:1478445-1478445	T	3_prime_UTR_variant	MODIFIER	GLYMA10G02090.2	protein_coding	GLYMA10G02090.2:c.*68dupT	-	730-731	-	-	-	-	1	-	C6T5T7_SOYBN	UPI0001B15F76	-
GLYMA10G02100	10:1478445-1478445	T	upstream_gene_variant	MODIFIER	GLYMA10G02100.1	protein_coding	-	-	-	-	-	-	-	1	-	I1L7T5_SOYBN	UPI000233C7DC	-
GLYMA10G02090	10:1478476-1478478	-	3_prime_UTR_variant	MODIFIER	GLYMA10G02090.2	protein_coding	GLYMA10G02090.2:c.*101_*102delTT	-	762-763	-	-	-	-	1	-	C6T5T7_SOYBN	UPI0001B15F76	-
GLYMA10G02100	10:1478476-1478478	-	upstream_gene_variant	MODIFIER	GLYMA10G02100.1	protein_coding	-	-	-	-	-	-	-	1	-	I1L7T5_SOYBN	UPI000233C7DC	-
GLYMA10G02090	10:1479126-1479126	T	downstream_gene_variant	MODIFIER	GLYMA10G02090.2	protein_coding	-	-	-	-	-	-	-	1	-	C6T5T7_SOYBN	UPI0001B15F76	-
GLYMA10G02100	10:1479126-1479126	T	upstream_gene_variant	MODIFIER	GLYMA10G02100.1	protein_coding	-	-	-	-	-	-	-	1	-	I1L7T5_SOYBN	UPI000233C7DC	-
GLYMA10G02090	10:1479173-1479173	A	downstream_gene_variant	MODIFIER	GLYMA10G02090.2	protein_coding	-	-	-	-	-	-	-	1	-	C6T5T7_SOYBN	UPI0001B15F76	-
GLYMA10G02100	10:1479173-1479173	A	upstream_gene_variant	MODIFIER	GLYMA10G02100.1	protein_coding	-	-	-	-	-	-	-	1	-	I1L7T5_SOYBN	UPI000233C7DC	-
GLYMA10G02090	10:1479414-1479416	-	downstream_gene_variant	MODIFIER	GLYMA10G02090.2	protein_coding	-	-	-	-	-	-	-	1	-	C6T5T7_SOYBN	UPI0001B15F76	-
GLYMA10G02100	10:1479414-1479416	-	upstream_gene_variant	MODIFIER	GLYMA10G02100.1	protein_coding	-	-	-	-	-	-	-	1	-	I1L7T5_SOYBN	UPI000233C7DC	-
GLYMA10G02090	10:1479417-1479417	TTT	downstream_gene_variant	MODIFIER	GLYMA10G02090.2	protein_coding	-	-	-	-	-	-	-	1	-	C6T5T7_SOYBN	UPI0001B15F76	-
GLYMA10G02100	10:1479417-1479417	TTT	upstream_gene_variant	MODIFIER	GLYMA10G02100.1	protein_coding	-	-	-	-	-	-	-	1	-	I1L7T5_SOYBN	UPI000233C7DC	-
GLYMA10G02090	10:1479440-1479441	-	downstream_gene_variant	MODIFIER	GLYMA10G02090.2	protein_coding	-	-	-	-	-	-	-	1	-	C6T5T7_SOYBN	UPI0001B15F76	-
GLYMA10G02100	10:1479440-1479441	-	upstream_gene_variant	MODIFIER	GLYMA10G02100.1	protein_coding	-	-	-	-	-	-	-	1	-	I1L7T5_SOYBN	UPI000233C7DC	-
GLYMA10G02090	10:1479777-1479777	AT	downstream_gene_variant	MODIFIER	GLYMA10G02090.2	protein_coding	-	-	-	-	-	-	-	1	-	C6T5T7_SOYBN	UPI0001B15F76	-
GLYMA10G02100	10:1479777-1479777	AT	upstream_gene_variant	MODIFIER	GLYMA10G02100.1	protein_coding	-	-	-	-	-	-	-	1	-	I1L7T5_SOYBN	UPI000233C7DC	-
GLYMA10G02111	10:1479777-1479777	AT	downstream_gene_variant	MODIFIER	GLYMA10G02111.1	protein_coding	-	-	-	-	-	-	-	-1	-	K7LGW4_SOYBN	UPI000294F037	-
GLYMA10G02090	10:1479853-1479855	-	downstream_gene_variant	MODIFIER	GLYMA10G02090.2	protein_coding	-	-	-	-	-	-	-	1	-	C6T5T7_SOYBN	UPI0001B15F76	-
GLYMA10G02100	10:1479853-1479855	-	upstream_gene_variant	MODIFIER	GLYMA10G02100.1	protein_coding	-	-	-	-	-	-	-	1	-	I1L7T5_SOYBN	UPI000233C7DC	-
GLYMA10G02111	10:1479853-1479855	-	downstream_gene_variant	MODIFIER	GLYMA10G02111.1	protein_coding	-	-	-	-	-	-	-	-1	-	K7LGW4_SOYBN	UPI000294F037	-
GLYMA10G02090	10:1479881-1479882	-	downstream_gene_variant	MODIFIER	GLYMA10G02090.2	protein_coding	-	-	-	-	-	-	-	1	-	C6T5T7_SOYBN	UPI0001B15F76	-
GLYMA10G02100	10:1479881-1479882	-	upstream_gene_variant	MODIFIER	GLYMA10G02100.1	protein_coding	-	-	-	-	-	-	-	1	-	I1L7T5_SOYBN	UPI000233C7DC	-
GLYMA10G02111	10:1479881-1479882	-	downstream_gene_variant	MODIFIER	GLYMA10G02111.1	protein_coding	-	-	-	-	-	-	-	-1	-	K7LGW4_SOYBN	UPI000294F037	-
GLYMA10G02090	10:1479960-1479964	-	downstream_gene_variant	MODIFIER	GLYMA10G02090.2	protein_coding	-	-	-	-	-	-	-	1	-	C6T5T7_SOYBN	UPI0001B15F76	-
GLYMA10G02100	10:1479960-1479964	-	upstream_gene_variant	MODIFIER	GLYMA10G02100.1	protein_coding	-	-	-	-	-	-	-	1	-	I1L7T5_SOYBN	UPI000233C7DC	-
GLYMA10G02111	10:1479960-1479964	-	downstream_gene_variant	MODIFIER	GLYMA10G02111.1	protein_coding	-	-	-	-	-	-	-	-1	-	K7LGW4_SOYBN	UPI000294F037	-
GLYMA10G02090	10:1481200-1481200	A	downstream_gene_variant	MODIFIER	GLYMA10G02090.2	protein_coding	-	-	-	-	-	-	-	1	-	C6T5T7_SOYBN	UPI0001B15F76	-
GLYMA10G02100	10:1481200-1481200	A	3_prime_UTR_variant	MODIFIER	GLYMA10G02100.1	protein_coding	GLYMA10G02100.1:c.*3_*4insA	-	561-562	-	-	-	-	1	-	I1L7T5_SOYBN	UPI000233C7DC	-
GLYMA10G02111	10:1481200-1481200	A	downstream_gene_variant	MODIFIER	GLYMA10G02111.1	protein_coding	-	-	-	-	-	-	-	-1	-	K7LGW4_SOYBN	UPI000294F037	-
GLYMA10G02120	10:1481200-1481200	A	downstream_gene_variant	MODIFIER	GLYMA10G02120.2	protein_coding	-	-	-	-	-	-	-	-1	-	K7LGW5_SOYBN	UPI000296A619	-
GLYMA10G02090	10:1482159-1482160	-	downstream_gene_variant	MODIFIER	GLYMA10G02090.2	protein_coding	-	-	-	-	-	-	-	1	-	C6T5T7_SOYBN	UPI0001B15F76	-
GLYMA10G02100	10:1482159-1482160	-	downstream_gene_variant	MODIFIER	GLYMA10G02100.1	protein_coding	-	-	-	-	-	-	-	1	-	I1L7T5_SOYBN	UPI000233C7DC	-
GLYMA10G02111	10:1482159-1482160	-	downstream_gene_variant	MODIFIER	GLYMA10G02111.1	protein_coding	-	-	-	-	-	-	-	-1	-	K7LGW4_SOYBN	UPI000294F037	-
GLYMA10G02120	10:1482159-1482160	-	downstream_gene_variant	MODIFIER	GLYMA10G02120.2	protein_coding	-	-	-	-	-	-	-	-1	-	K7LGW5_SOYBN	UPI000296A619	-
GLYMA10G02100	10:1485849-1485849	TT	downstream_gene_variant	MODIFIER	GLYMA10G02100.1	protein_coding	-	-	-	-	-	-	-	1	-	I1L7T5_SOYBN	UPI000233C7DC	-
GLYMA10G02111	10:1485849-1485849	TT	upstream_gene_variant	MODIFIER	GLYMA10G02111.1	protein_coding	-	-	-	-	-	-	-	-1	-	K7LGW4_SOYBN	UPI000294F037	-
GLYMA10G02120	10:1485849-1485849	TT	downstream_gene_variant	MODIFIER	GLYMA10G02120.2	protein_coding	-	-	-	-	-	-	-	-1	-	K7LGW5_SOYBN	UPI000296A619	-
GLYMA10G02111	10:1488245-1488245	ATTTA	upstream_gene_variant	MODIFIER	GLYMA10G02111.1	protein_coding	-	-	-	-	-	-	-	-1	-	K7LGW4_SOYBN	UPI000294F037	-
GLYMA10G02120	10:1488245-1488245	ATTTA	intron_variant	MODIFIER	GLYMA10G02120.2	protein_coding	GLYMA10G02120.2:c.187-123_187-122insTAAAT	-	-	-	-	-	-	-1	-	K7LGW5_SOYBN	UPI000296A619	-
GLYMA10G02130	10:1488245-1488245	ATTTA	downstream_gene_variant	MODIFIER	GLYMA10G02130.1	protein_coding	-	-	-	-	-	-	-	-1	-	I1L7T7_SOYBN	UPI000233C4FD	-
GLYMA10G02120	10:1491750-1491750	A	upstream_gene_variant	MODIFIER	GLYMA10G02120.2	protein_coding	-	-	-	-	-	-	-	-1	-	K7LGW5_SOYBN	UPI000296A619	-
GLYMA10G02130	10:1491750-1491750	A	intron_variant	MODIFIER	GLYMA10G02130.1	protein_coding	GLYMA10G02130.1:c.1186-18dupT	-	-	-	-	-	-	-1	-	I1L7T7_SOYBN	UPI000233C4FD	-
GLYMA10G02130	10:1494616-1494617	-	upstream_gene_variant	MODIFIER	GLYMA10G02130.1	protein_coding	-	-	-	-	-	-	-	-1	-	I1L7T7_SOYBN	UPI000233C4FD	-
GLYMA10G02140	10:1499409-1499409	TTA	downstream_gene_variant	MODIFIER	GLYMA10G02140.2	protein_coding	-	-	-	-	-	-	-	-1	-	K7LGW6_SOYBN	UPI000296207C	-
GLYMA10G02140	10:1500316-1500316	TTG	downstream_gene_variant	MODIFIER	GLYMA10G02140.2	protein_coding	-	-	-	-	-	-	-	-1	-	K7LGW6_SOYBN	UPI000296207C	-
GLYMA10G02140	10:1500681-1500681	A	downstream_gene_variant	MODIFIER	GLYMA10G02140.2	protein_coding	-	-	-	-	-	-	-	-1	-	K7LGW6_SOYBN	UPI000296207C	-
GLYMA10G02140	10:1503325-1503325	CCTCTGC	intron_variant	MODIFIER	GLYMA10G02140.2	protein_coding	GLYMA10G02140.2:c.896-646_896-645insGCAGAGG	-	-	-	-	-	-	-1	-	K7LGW6_SOYBN	UPI000296207C	-
GLYMA10G02140	10:1503777-1503777	A	intron_variant	MODIFIER	GLYMA10G02140.2	protein_coding	GLYMA10G02140.2:c.895+1048dupT	-	-	-	-	-	-	-1	-	K7LGW6_SOYBN	UPI000296207C	-
GLYMA10G02140	10:1505233-1505235	-	intron_variant	MODIFIER	GLYMA10G02140.2	protein_coding	GLYMA10G02140.2:c.734+218_734+219delTT	-	-	-	-	-	-	-1	-	K7LGW6_SOYBN	UPI000296207C	-
GLYMA10G02140	10:1510152-1510152	T	upstream_gene_variant	MODIFIER	GLYMA10G02140.2	protein_coding	-	-	-	-	-	-	-	-1	-	K7LGW6_SOYBN	UPI000296207C	-
GLYMA10G02160	10:1510152-1510152	T	upstream_gene_variant	MODIFIER	GLYMA10G02160.1	protein_coding	-	-	-	-	-	-	-	1	-	I1L7T9_SOYBN	UPI000233C500	-
GLYMA10G02160	10:1511339-1511339	ATAAAAATATT	upstream_gene_variant	MODIFIER	GLYMA10G02160.1	protein_coding	-	-	-	-	-	-	-	1	-	I1L7T9_SOYBN	UPI000233C500	-
GLYMA10G02160	10:1511809-1511809	T	upstream_gene_variant	MODIFIER	GLYMA10G02160.1	protein_coding	-	-	-	-	-	-	-	1	-	I1L7T9_SOYBN	UPI000233C500	-
GLYMA10G02160	10:1511897-1511901	-	upstream_gene_variant	MODIFIER	GLYMA10G02160.1	protein_coding	-	-	-	-	-	-	-	1	-	I1L7T9_SOYBN	UPI000233C500	-
GLYMA10G02160	10:1513594-1513594	A	intron_variant	MODIFIER	GLYMA10G02160.1	protein_coding	GLYMA10G02160.1:c.988+102dupA	-	-	-	-	-	-	1	-	I1L7T9_SOYBN	UPI000233C500	-
GLYMA10G02160	10:1513888-1513888	AA	intron_variant	MODIFIER	GLYMA10G02160.1	protein_coding	GLYMA10G02160.1:c.988+396_988+397dupAA	-	-	-	-	-	-	1	-	I1L7T9_SOYBN	UPI000233C500	-
GLYMA10G02160	10:1516348-1516348	T	downstream_gene_variant	MODIFIER	GLYMA10G02160.1	protein_coding	-	-	-	-	-	-	-	1	-	I1L7T9_SOYBN	UPI000233C500	-
GLYMA10G02170	10:1516348-1516348	T	downstream_gene_variant	MODIFIER	GLYMA10G02170.1	protein_coding	-	-	-	-	-	-	-	-1	-	I1L7U0_SOYBN	UPI00029568F7	-
GLYMA10G02170	10:1524305-1524305	T	upstream_gene_variant	MODIFIER	GLYMA10G02170.1	protein_coding	-	-	-	-	-	-	-	-1	-	I1L7U0_SOYBN	UPI00029568F7	-
GLYMA10G02180	10:1524305-1524305	T	downstream_gene_variant	MODIFIER	GLYMA10G02180.1	protein_coding	-	-	-	-	-	-	-	1	-	C6T0U9_SOYBN	UPI0001B155D2	-
GLYMA10G02190	10:1524305-1524305	T	upstream_gene_variant	MODIFIER	GLYMA10G02190.1	protein_coding	-	-	-	-	-	-	-	1	-	I1L7U2_SOYBN	UPI000233CAC9	-
GLYMA10G02180	10:1524794-1524794	T	downstream_gene_variant	MODIFIER	GLYMA10G02180.1	protein_coding	-	-	-	-	-	-	-	1	-	C6T0U9_SOYBN	UPI0001B155D2	-
GLYMA10G02190	10:1524794-1524794	T	upstream_gene_variant	MODIFIER	GLYMA10G02190.1	protein_coding	-	-	-	-	-	-	-	1	-	I1L7U2_SOYBN	UPI000233CAC9	-
GLYMA10G02180	10:1525331-1525331	GT	downstream_gene_variant	MODIFIER	GLYMA10G02180.1	protein_coding	-	-	-	-	-	-	-	1	-	C6T0U9_SOYBN	UPI0001B155D2	-
GLYMA10G02190	10:1525331-1525331	GT	upstream_gene_variant	MODIFIER	GLYMA10G02190.1	protein_coding	-	-	-	-	-	-	-	1	-	I1L7U2_SOYBN	UPI000233CAC9	-
GLYMA10G02180	10:1526205-1526205	G	downstream_gene_variant	MODIFIER	GLYMA10G02180.1	protein_coding	-	-	-	-	-	-	-	1	-	C6T0U9_SOYBN	UPI0001B155D2	-
GLYMA10G02190	10:1526205-1526205	G	upstream_gene_variant	MODIFIER	GLYMA10G02190.1	protein_coding	-	-	-	-	-	-	-	1	-	I1L7U2_SOYBN	UPI000233CAC9	-
GLYMA10G02180	10:1526826-1526827	-	downstream_gene_variant	MODIFIER	GLYMA10G02180.1	protein_coding	-	-	-	-	-	-	-	1	-	C6T0U9_SOYBN	UPI0001B155D2	-
GLYMA10G02190	10:1526826-1526827	-	upstream_gene_variant	MODIFIER	GLYMA10G02190.1	protein_coding	-	-	-	-	-	-	-	1	-	I1L7U2_SOYBN	UPI000233CAC9	-
GLYMA10G02180	10:1528099-1528099	T	downstream_gene_variant	MODIFIER	GLYMA10G02180.1	protein_coding	-	-	-	-	-	-	-	1	-	C6T0U9_SOYBN	UPI0001B155D2	-
GLYMA10G02190	10:1528099-1528099	T	downstream_gene_variant	MODIFIER	GLYMA10G02190.1	protein_coding	-	-	-	-	-	-	-	1	-	I1L7U2_SOYBN	UPI000233CAC9	-
GLYMA10G02180	10:1528589-1528589	TGCCCTTTATCAACTTCATAAT	downstream_gene_variant	MODIFIER	GLYMA10G02180.1	protein_coding	-	-	-	-	-	-	-	1	-	C6T0U9_SOYBN	UPI0001B155D2	-
GLYMA10G02190	10:1528589-1528589	TGCCCTTTATCAACTTCATAAT	downstream_gene_variant	MODIFIER	GLYMA10G02190.1	protein_coding	-	-	-	-	-	-	-	1	-	I1L7U2_SOYBN	UPI000233CAC9	-
GLYMA10G02210	10:1528589-1528589	TGCCCTTTATCAACTTCATAAT	downstream_gene_variant	MODIFIER	GLYMA10G02210.1	protein_coding	-	-	-	-	-	-	-	-1	-	C6SZ33_SOYBN	UPI000189D67D	-
GLYMA10G02180	10:1528897-1528897	G	downstream_gene_variant	MODIFIER	GLYMA10G02180.1	protein_coding	-	-	-	-	-	-	-	1	-	C6T0U9_SOYBN	UPI0001B155D2	-
GLYMA10G02190	10:1528897-1528897	G	downstream_gene_variant	MODIFIER	GLYMA10G02190.1	protein_coding	-	-	-	-	-	-	-	1	-	I1L7U2_SOYBN	UPI000233CAC9	-
GLYMA10G02210	10:1528897-1528897	G	downstream_gene_variant	MODIFIER	GLYMA10G02210.1	protein_coding	-	-	-	-	-	-	-	-1	-	C6SZ33_SOYBN	UPI000189D67D	-
GLYMA10G02190	10:1529357-1529359	-	downstream_gene_variant	MODIFIER	GLYMA10G02190.1	protein_coding	-	-	-	-	-	-	-	1	-	I1L7U2_SOYBN	UPI000233CAC9	-
GLYMA10G02210	10:1529357-1529359	-	downstream_gene_variant	MODIFIER	GLYMA10G02210.1	protein_coding	-	-	-	-	-	-	-	-1	-	C6SZ33_SOYBN	UPI000189D67D	-
GLYMA10G02190	10:1531123-1531123	A	downstream_gene_variant	MODIFIER	GLYMA10G02190.1	protein_coding	-	-	-	-	-	-	-	1	-	I1L7U2_SOYBN	UPI000233CAC9	-
GLYMA10G02210	10:1531123-1531123	A	downstream_gene_variant	MODIFIER	GLYMA10G02210.1	protein_coding	-	-	-	-	-	-	-	-1	-	C6SZ33_SOYBN	UPI000189D67D	-
GLYMA10G02190	10:1531569-1531569	AA	downstream_gene_variant	MODIFIER	GLYMA10G02190.1	protein_coding	-	-	-	-	-	-	-	1	-	I1L7U2_SOYBN	UPI000233CAC9	-
GLYMA10G02210	10:1531569-1531569	AA	downstream_gene_variant	MODIFIER	GLYMA10G02210.1	protein_coding	-	-	-	-	-	-	-	-1	-	C6SZ33_SOYBN	UPI000189D67D	-
GLYMA10G02210	10:1533972-1533972	CT	intron_variant	MODIFIER	GLYMA10G02210.1	protein_coding	GLYMA10G02210.1:c.75-124_75-123dupAG	-	-	-	-	-	-	-1	-	C6SZ33_SOYBN	UPI000189D67D	-
GLYMA10G02210	10:1534114-1534114	TA	intron_variant	MODIFIER	GLYMA10G02210.1	protein_coding	GLYMA10G02210.1:c.75-265_75-264insTA	-	-	-	-	-	-	-1	-	C6SZ33_SOYBN	UPI000189D67D	-
GLYMA10G02210	10:1535032-1535032	A	upstream_gene_variant	MODIFIER	GLYMA10G02210.1	protein_coding	-	-	-	-	-	-	-	-1	-	C6SZ33_SOYBN	UPI000189D67D	-
GLYMA10G02220	10:1535032-1535032	A	upstream_gene_variant	MODIFIER	GLYMA10G02220.2	protein_coding	-	-	-	-	-	-	-	1	-	K7LGW7_SOYBN	UPI000294B402	-
GLYMA10G02210	10:1536402-1536403	-	upstream_gene_variant	MODIFIER	GLYMA10G02210.1	protein_coding	-	-	-	-	-	-	-	-1	-	C6SZ33_SOYBN	UPI000189D67D	-
GLYMA10G02220	10:1536402-1536403	-	upstream_gene_variant	MODIFIER	GLYMA10G02220.2	protein_coding	-	-	-	-	-	-	-	1	-	K7LGW7_SOYBN	UPI000294B402	-
GLYMA10G02210	10:1538224-1538237	-	upstream_gene_variant	MODIFIER	GLYMA10G02210.1	protein_coding	-	-	-	-	-	-	-	-1	-	C6SZ33_SOYBN	UPI000189D67D	-
GLYMA10G02220	10:1538224-1538237	-	upstream_gene_variant	MODIFIER	GLYMA10G02220.2	protein_coding	-	-	-	-	-	-	-	1	-	K7LGW7_SOYBN	UPI000294B402	-
GLYMA10G02220	10:1539770-1539770	T	intron_variant	MODIFIER	GLYMA10G02220.2	protein_coding	GLYMA10G02220.2:c.176+382dupT	-	-	-	-	-	-	1	-	K7LGW7_SOYBN	UPI000294B402	-
GLYMA10G02250	10:1578797-1578797	AAA	upstream_gene_variant	MODIFIER	GLYMA10G02250.1	protein_coding	-	-	-	-	-	-	-	-1	-	I1L7U8_SOYBN	UPI00023C956D	-
GLYMA10G02260	10:1578797-1578797	AAA	downstream_gene_variant	MODIFIER	GLYMA10G02260.1	protein_coding	-	-	-	-	-	-	-	-1	-	I1L7U9_SOYBN	UPI000295A23F	-
GLYMA10G02250	10:1581701-1581701	A	upstream_gene_variant	MODIFIER	GLYMA10G02250.1	protein_coding	-	-	-	-	-	-	-	-1	-	I1L7U8_SOYBN	UPI00023C956D	-
GLYMA10G02260	10:1581701-1581701	A	upstream_gene_variant	MODIFIER	GLYMA10G02260.1	protein_coding	-	-	-	-	-	-	-	-1	-	I1L7U9_SOYBN	UPI000295A23F	-
GLYMA10G02270	10:1581701-1581701	A	downstream_gene_variant	MODIFIER	GLYMA10G02270.1	protein_coding	-	-	-	-	-	-	-	-1	-	C6SVK2_SOYBN	UPI0001B1574D	-
GLYMA10G02250	10:1582036-1582036	A	upstream_gene_variant	MODIFIER	GLYMA10G02250.1	protein_coding	-	-	-	-	-	-	-	-1	-	I1L7U8_SOYBN	UPI00023C956D	-
GLYMA10G02260	10:1582036-1582036	A	upstream_gene_variant	MODIFIER	GLYMA10G02260.1	protein_coding	-	-	-	-	-	-	-	-1	-	I1L7U9_SOYBN	UPI000295A23F	-
GLYMA10G02270	10:1582036-1582036	A	downstream_gene_variant	MODIFIER	GLYMA10G02270.1	protein_coding	-	-	-	-	-	-	-	-1	-	C6SVK2_SOYBN	UPI0001B1574D	-
GLYMA10G02250	10:1582080-1582080	C	upstream_gene_variant	MODIFIER	GLYMA10G02250.1	protein_coding	-	-	-	-	-	-	-	-1	-	I1L7U8_SOYBN	UPI00023C956D	-
GLYMA10G02260	10:1582080-1582080	C	upstream_gene_variant	MODIFIER	GLYMA10G02260.1	protein_coding	-	-	-	-	-	-	-	-1	-	I1L7U9_SOYBN	UPI000295A23F	-
GLYMA10G02270	10:1582080-1582080	C	downstream_gene_variant	MODIFIER	GLYMA10G02270.1	protein_coding	-	-	-	-	-	-	-	-1	-	C6SVK2_SOYBN	UPI0001B1574D	-
GLYMA10G02250	10:1582124-1582124	TT	upstream_gene_variant	MODIFIER	GLYMA10G02250.1	protein_coding	-	-	-	-	-	-	-	-1	-	I1L7U8_SOYBN	UPI00023C956D	-
GLYMA10G02260	10:1582124-1582124	TT	upstream_gene_variant	MODIFIER	GLYMA10G02260.1	protein_coding	-	-	-	-	-	-	-	-1	-	I1L7U9_SOYBN	UPI000295A23F	-
GLYMA10G02270	10:1582124-1582124	TT	downstream_gene_variant	MODIFIER	GLYMA10G02270.1	protein_coding	-	-	-	-	-	-	-	-1	-	C6SVK2_SOYBN	UPI0001B1574D	-
GLYMA10G02260	10:1586091-1586091	AG	upstream_gene_variant	MODIFIER	GLYMA10G02260.1	protein_coding	-	-	-	-	-	-	-	-1	-	I1L7U9_SOYBN	UPI000295A23F	-
GLYMA10G02270	10:1586091-1586091	AG	downstream_gene_variant	MODIFIER	GLYMA10G02270.1	protein_coding	-	-	-	-	-	-	-	-1	-	C6SVK2_SOYBN	UPI0001B1574D	-
GLYMA10G02281	10:1586091-1586091	AG	upstream_gene_variant	MODIFIER	GLYMA10G02281.1	protein_coding	-	-	-	-	-	-	-	1	-	K7LGW8_SOYBN	UPI000233CDC5	-
GLYMA10G02270	10:1587335-1587335	TTTC	intron_variant	MODIFIER	GLYMA10G02270.1	protein_coding	GLYMA10G02270.1:c.216-420_216-417dupGAAA	-	-	-	-	-	-	-1	-	C6SVK2_SOYBN	UPI0001B1574D	-
GLYMA10G02281	10:1587335-1587335	TTTC	upstream_gene_variant	MODIFIER	GLYMA10G02281.1	protein_coding	-	-	-	-	-	-	-	1	-	K7LGW8_SOYBN	UPI000233CDC5	-
GLYMA10G02270	10:1587668-1587668	G	intron_variant	MODIFIER	GLYMA10G02270.1	protein_coding	GLYMA10G02270.1:c.215+576dupC	-	-	-	-	-	-	-1	-	C6SVK2_SOYBN	UPI0001B1574D	-
GLYMA10G02281	10:1587668-1587668	G	upstream_gene_variant	MODIFIER	GLYMA10G02281.1	protein_coding	-	-	-	-	-	-	-	1	-	K7LGW8_SOYBN	UPI000233CDC5	-
GLYMA10G02270	10:1587987-1587987	AGTTTTCAAAC	intron_variant	MODIFIER	GLYMA10G02270.1	protein_coding	GLYMA10G02270.1:c.215+257_215+258insGTTTGAAAACT	-	-	-	-	-	-	-1	-	C6SVK2_SOYBN	UPI0001B1574D	-
GLYMA10G02281	10:1587987-1587987	AGTTTTCAAAC	upstream_gene_variant	MODIFIER	GLYMA10G02281.1	protein_coding	-	-	-	-	-	-	-	1	-	K7LGW8_SOYBN	UPI000233CDC5	-
GLYMA10G02270	10:1588467-1588467	CTCTCTCT	5_prime_UTR_variant	MODIFIER	GLYMA10G02270.1	protein_coding	GLYMA10G02270.1:c.-16_-9dupAGAGAGAG	-	122-123	-	-	-	-	-1	-	C6SVK2_SOYBN	UPI0001B1574D	-
GLYMA10G02281	10:1588467-1588467	CTCTCTCT	upstream_gene_variant	MODIFIER	GLYMA10G02281.1	protein_coding	-	-	-	-	-	-	-	1	-	K7LGW8_SOYBN	UPI000233CDC5	-
GLYMA10G02270	10:1590249-1590249	TA	upstream_gene_variant	MODIFIER	GLYMA10G02270.1	protein_coding	-	-	-	-	-	-	-	-1	-	C6SVK2_SOYBN	UPI0001B1574D	-
GLYMA10G02281	10:1590249-1590249	TA	intron_variant	MODIFIER	GLYMA10G02281.1	protein_coding	GLYMA10G02281.1:c.258+933_258+934insAT	-	-	-	-	-	-	1	-	K7LGW8_SOYBN	UPI000233CDC5	-
GLYMA10G02290	10:1590249-1590249	TA	downstream_gene_variant	MODIFIER	GLYMA10G02290.1	protein_coding	-	-	-	-	-	-	-	-1	-	I1L7V1_SOYBN	UPI000233CC5B	-
GLYMA10G02290	10:1590249-1590249	TA	downstream_gene_variant	MODIFIER	GLYMA10G02290.2	protein_coding	-	-	-	-	-	-	-	-1	-	I1L7V2_SOYBN	UPI00023C9570	-
GLYMA10G02270	10:1590832-1590832	A	upstream_gene_variant	MODIFIER	GLYMA10G02270.1	protein_coding	-	-	-	-	-	-	-	-1	-	C6SVK2_SOYBN	UPI0001B1574D	-
GLYMA10G02281	10:1590832-1590832	A	intron_variant	MODIFIER	GLYMA10G02281.1	protein_coding	GLYMA10G02281.1:c.259-685dupA	-	-	-	-	-	-	1	-	K7LGW8_SOYBN	UPI000233CDC5	-
GLYMA10G02290	10:1590832-1590832	A	downstream_gene_variant	MODIFIER	GLYMA10G02290.1	protein_coding	-	-	-	-	-	-	-	-1	-	I1L7V1_SOYBN	UPI000233CC5B	-
GLYMA10G02290	10:1590832-1590832	A	downstream_gene_variant	MODIFIER	GLYMA10G02290.2	protein_coding	-	-	-	-	-	-	-	-1	-	I1L7V2_SOYBN	UPI00023C9570	-
GLYMA10G02270	10:1593280-1593280	T	upstream_gene_variant	MODIFIER	GLYMA10G02270.1	protein_coding	-	-	-	-	-	-	-	-1	-	C6SVK2_SOYBN	UPI0001B1574D	-
GLYMA10G02281	10:1593280-1593280	T	downstream_gene_variant	MODIFIER	GLYMA10G02281.1	protein_coding	-	-	-	-	-	-	-	1	-	K7LGW8_SOYBN	UPI000233CDC5	-
GLYMA10G02290	10:1593280-1593280	T	downstream_gene_variant	MODIFIER	GLYMA10G02290.1	protein_coding	-	-	-	-	-	-	-	-1	-	I1L7V1_SOYBN	UPI000233CC5B	-
GLYMA10G02290	10:1593280-1593280	T	downstream_gene_variant	MODIFIER	GLYMA10G02290.2	protein_coding	-	-	-	-	-	-	-	-1	-	I1L7V2_SOYBN	UPI00023C9570	-
GLYMA10G02281	10:1594672-1594672	A	downstream_gene_variant	MODIFIER	GLYMA10G02281.1	protein_coding	-	-	-	-	-	-	-	1	-	K7LGW8_SOYBN	UPI000233CDC5	-
GLYMA10G02290	10:1594672-1594672	A	intron_variant	MODIFIER	GLYMA10G02290.1	protein_coding	GLYMA10G02290.1:c.1071+266dupT	-	-	-	-	-	-	-1	-	I1L7V1_SOYBN	UPI000233CC5B	-
GLYMA10G02290	10:1594672-1594672	A	3_prime_UTR_variant	MODIFIER	GLYMA10G02290.2	protein_coding	GLYMA10G02290.2:c.*230dupT	-	1484-1485	-	-	-	-	-1	-	I1L7V2_SOYBN	UPI00023C9570	-
GLYMA10G02290	10:1598497-1598506	-	upstream_gene_variant	MODIFIER	GLYMA10G02290.1	protein_coding	-	-	-	-	-	-	-	-1	-	I1L7V1_SOYBN	UPI000233CC5B	-
GLYMA10G02290	10:1598497-1598506	-	upstream_gene_variant	MODIFIER	GLYMA10G02290.2	protein_coding	-	-	-	-	-	-	-	-1	-	I1L7V2_SOYBN	UPI00023C9570	-
GLYMA10G02290	10:1601146-1601146	G	upstream_gene_variant	MODIFIER	GLYMA10G02290.1	protein_coding	-	-	-	-	-	-	-	-1	-	I1L7V1_SOYBN	UPI000233CC5B	-
GLYMA10G02290	10:1601146-1601146	G	upstream_gene_variant	MODIFIER	GLYMA10G02290.2	protein_coding	-	-	-	-	-	-	-	-1	-	I1L7V2_SOYBN	UPI00023C9570	-
GLYMA10G02290	10:1602576-1602576	A	upstream_gene_variant	MODIFIER	GLYMA10G02290.1	protein_coding	-	-	-	-	-	-	-	-1	-	I1L7V1_SOYBN	UPI000233CC5B	-
GLYMA10G02290	10:1602576-1602576	A	upstream_gene_variant	MODIFIER	GLYMA10G02290.2	protein_coding	-	-	-	-	-	-	-	-1	-	I1L7V2_SOYBN	UPI00023C9570	-
GLYMA10G02290	10:1602663-1602663	TTTTAAAA	upstream_gene_variant	MODIFIER	GLYMA10G02290.1	protein_coding	-	-	-	-	-	-	-	-1	-	I1L7V1_SOYBN	UPI000233CC5B	-
GLYMA10G02290	10:1602663-1602663	TTTTAAAA	upstream_gene_variant	MODIFIER	GLYMA10G02290.2	protein_coding	-	-	-	-	-	-	-	-1	-	I1L7V2_SOYBN	UPI00023C9570	-
-	10:1603152-1603152	ATG	intergenic_variant	MODIFIER	-	-	-	-	-	-	-	-	-	-	-	-	-	-
-	10:1603171-1603171	A	intergenic_variant	MODIFIER	-	-	-	-	-	-	-	-	-	-	-	-	-	-
-	10:1603308-1603308	AAAA	intergenic_variant	MODIFIER	-	-	-	-	-	-	-	-	-	-	-	-	-	-
-	10:1603441-1603441	A	intergenic_variant	MODIFIER	-	-	-	-	-	-	-	-	-	-	-	-	-	-
-	10:1603692-1603693	-	intergenic_variant	MODIFIER	-	-	-	-	-	-	-	-	-	-	-	-	-	-
-	10:1603700-1603702	-	intergenic_variant	MODIFIER	-	-	-	-	-	-	-	-	-	-	-	-	-	-
-	10:1604907-1604907	TCTAACTT	intergenic_variant	MODIFIER	-	-	-	-	-	-	-	-	-	-	-	-	-	-
-	10:1604933-1604933	G	intergenic_variant	MODIFIER	-	-	-	-	-	-	-	-	-	-	-	-	-	-
GLYMA10G02310	10:1605640-1605641	-	downstream_gene_variant	MODIFIER	GLYMA10G02310.1	protein_coding	-	-	-	-	-	-	-	-1	-	C6SWM9_SOYBN	UPI0001B14FEF	-
GLYMA10G02310	10:1605904-1605904	TA	downstream_gene_variant	MODIFIER	GLYMA10G02310.1	protein_coding	-	-	-	-	-	-	-	-1	-	C6SWM9_SOYBN	UPI0001B14FEF	-
GLYMA10G02310	10:1606042-1606042	A	downstream_gene_variant	MODIFIER	GLYMA10G02310.1	protein_coding	-	-	-	-	-	-	-	-1	-	C6SWM9_SOYBN	UPI0001B14FEF	-
GLYMA10G02310	10:1606086-1606086	A	downstream_gene_variant	MODIFIER	GLYMA10G02310.1	protein_coding	-	-	-	-	-	-	-	-1	-	C6SWM9_SOYBN	UPI0001B14FEF	-
GLYMA10G02310	10:1606247-1606247	TAT	downstream_gene_variant	MODIFIER	GLYMA10G02310.1	protein_coding	-	-	-	-	-	-	-	-1	-	C6SWM9_SOYBN	UPI0001B14FEF	-
GLYMA10G02310	10:1608182-1608182	T	downstream_gene_variant	MODIFIER	GLYMA10G02310.1	protein_coding	-	-	-	-	-	-	-	-1	-	C6SWM9_SOYBN	UPI0001B14FEF	-
GLYMA10G02320	10:1608182-1608182	T	upstream_gene_variant	MODIFIER	GLYMA10G02320.1	protein_coding	-	-	-	-	-	-	-	1	-	K7LGW9_SOYBN	UPI0002966681	-
GLYMA10G02330	10:1608182-1608182	T	downstream_gene_variant	MODIFIER	GLYMA10G02330.2	protein_coding	-	-	-	-	-	-	-	-1	-	K7LGX0_SOYBN	UPI0002968142	-
GLYMA10G02310	10:1611528-1611528	TT	5_prime_UTR_variant	MODIFIER	GLYMA10G02310.1	protein_coding	GLYMA10G02310.1:c.-146_-145dupAA	-	157-158	-	-	-	-	-1	-	C6SWM9_SOYBN	UPI0001B14FEF	-
GLYMA10G02320	10:1611528-1611528	TT	upstream_gene_variant	MODIFIER	GLYMA10G02320.1	protein_coding	-	-	-	-	-	-	-	1	-	K7LGW9_SOYBN	UPI0002966681	-
GLYMA10G02330	10:1611528-1611528	TT	downstream_gene_variant	MODIFIER	GLYMA10G02330.2	protein_coding	-	-	-	-	-	-	-	-1	-	K7LGX0_SOYBN	UPI0002968142	-
GLYMA10G02310	10:1611537-1611537	A	5_prime_UTR_variant	MODIFIER	GLYMA10G02310.1	protein_coding	GLYMA10G02310.1:c.-154dupT	-	148-149	-	-	-	-	-1	-	C6SWM9_SOYBN	UPI0001B14FEF	-
GLYMA10G02320	10:1611537-1611537	A	upstream_gene_variant	MODIFIER	GLYMA10G02320.1	protein_coding	-	-	-	-	-	-	-	1	-	K7LGW9_SOYBN	UPI0002966681	-
GLYMA10G02330	10:1611537-1611537	A	downstream_gene_variant	MODIFIER	GLYMA10G02330.2	protein_coding	-	-	-	-	-	-	-	-1	-	K7LGX0_SOYBN	UPI0002968142	-
GLYMA10G02310	10:1611792-1611792	T	upstream_gene_variant	MODIFIER	GLYMA10G02310.1	protein_coding	-	-	-	-	-	-	-	-1	-	C6SWM9_SOYBN	UPI0001B14FEF	-
GLYMA10G02320	10:1611792-1611792	T	upstream_gene_variant	MODIFIER	GLYMA10G02320.1	protein_coding	-	-	-	-	-	-	-	1	-	K7LGW9_SOYBN	UPI0002966681	-
GLYMA10G02330	10:1611792-1611792	T	downstream_gene_variant	MODIFIER	GLYMA10G02330.2	protein_coding	-	-	-	-	-	-	-	-1	-	K7LGX0_SOYBN	UPI0002968142	-
GLYMA10G02310	10:1612561-1612561	TATTGCT	upstream_gene_variant	MODIFIER	GLYMA10G02310.1	protein_coding	-	-	-	-	-	-	-	-1	-	C6SWM9_SOYBN	UPI0001B14FEF	-
GLYMA10G02320	10:1612561-1612561	TATTGCT	3_prime_UTR_variant	MODIFIER	GLYMA10G02320.1	protein_coding	GLYMA10G02320.1:c.*12_*13insATTGCTT	-	313-314	-	-	-	-	1	-	K7LGW9_SOYBN	UPI0002966681	-
GLYMA10G02330	10:1612561-1612561	TATTGCT	3_prime_UTR_variant	MODIFIER	GLYMA10G02330.2	protein_coding	GLYMA10G02330.2:c.*127_*128insAGCAATA	-	991-992	-	-	-	-	-1	-	K7LGX0_SOYBN	UPI0002968142	-
GLYMA10G02310	10:1613962-1613962	AGTGAG	upstream_gene_variant	MODIFIER	GLYMA10G02310.1	protein_coding	-	-	-	-	-	-	-	-1	-	C6SWM9_SOYBN	UPI0001B14FEF	-
GLYMA10G02320	10:1613962-1613962	AGTGAG	downstream_gene_variant	MODIFIER	GLYMA10G02320.1	protein_coding	-	-	-	-	-	-	-	1	-	K7LGW9_SOYBN	UPI0002966681	-
GLYMA10G02330	10:1613962-1613962	AGTGAG	intron_variant	MODIFIER	GLYMA10G02330.2	protein_coding	GLYMA10G02330.2:c.670+543_670+544insCTCACT	-	-	-	-	-	-	-1	-	K7LGX0_SOYBN	UPI0002968142	-
GLYMA10G02340	10:1613962-1613962	AGTGAG	downstream_gene_variant	MODIFIER	GLYMA10G02340.1	protein_coding	-	-	-	-	-	-	-	-1	-	I1L7V6_SOYBN	UPI00023C9709	-
GLYMA10G02340	10:1613962-1613962	AGTGAG	downstream_gene_variant	MODIFIER	GLYMA10G02340.2	protein_coding	-	-	-	-	-	-	-	-1	-	I1L7V7_SOYBN	UPI00023C970A	-
GLYMA10G02310	10:1614013-1614026	-	upstream_gene_variant	MODIFIER	GLYMA10G02310.1	protein_coding	-	-	-	-	-	-	-	-1	-	C6SWM9_SOYBN	UPI0001B14FEF	-
GLYMA10G02320	10:1614013-1614026	-	downstream_gene_variant	MODIFIER	GLYMA10G02320.1	protein_coding	-	-	-	-	-	-	-	1	-	K7LGW9_SOYBN	UPI0002966681	-
GLYMA10G02330	10:1614013-1614026	-	intron_variant	MODIFIER	GLYMA10G02330.2	protein_coding	GLYMA10G02330.2:c.670+480_670+492delGGACTGAAAATTT	-	-	-	-	-	-	-1	-	K7LGX0_SOYBN	UPI0002968142	-
GLYMA10G02340	10:1614013-1614026	-	downstream_gene_variant	MODIFIER	GLYMA10G02340.1	protein_coding	-	-	-	-	-	-	-	-1	-	I1L7V6_SOYBN	UPI00023C9709	-
GLYMA10G02340	10:1614013-1614026	-	downstream_gene_variant	MODIFIER	GLYMA10G02340.2	protein_coding	-	-	-	-	-	-	-	-1	-	I1L7V7_SOYBN	UPI00023C970A	-
GLYMA10G02310	10:1615966-1615966	TATAATGTATAATTTTA	upstream_gene_variant	MODIFIER	GLYMA10G02310.1	protein_coding	-	-	-	-	-	-	-	-1	-	C6SWM9_SOYBN	UPI0001B14FEF	-
GLYMA10G02320	10:1615966-1615966	TATAATGTATAATTTTA	downstream_gene_variant	MODIFIER	GLYMA10G02320.1	protein_coding	-	-	-	-	-	-	-	1	-	K7LGW9_SOYBN	UPI0002966681	-
GLYMA10G02330	10:1615966-1615966	TATAATGTATAATTTTA	upstream_gene_variant	MODIFIER	GLYMA10G02330.2	protein_coding	-	-	-	-	-	-	-	-1	-	K7LGX0_SOYBN	UPI0002968142	-
GLYMA10G02340	10:1615966-1615966	TATAATGTATAATTTTA	downstream_gene_variant	MODIFIER	GLYMA10G02340.1	protein_coding	-	-	-	-	-	-	-	-1	-	I1L7V6_SOYBN	UPI00023C9709	-
GLYMA10G02340	10:1615966-1615966	TATAATGTATAATTTTA	downstream_gene_variant	MODIFIER	GLYMA10G02340.2	protein_coding	-	-	-	-	-	-	-	-1	-	I1L7V7_SOYBN	UPI00023C970A	-
GLYMA10G02310	10:1616095-1616095	T	upstream_gene_variant	MODIFIER	GLYMA10G02310.1	protein_coding	-	-	-	-	-	-	-	-1	-	C6SWM9_SOYBN	UPI0001B14FEF	-
GLYMA10G02320	10:1616095-1616095	T	downstream_gene_variant	MODIFIER	GLYMA10G02320.1	protein_coding	-	-	-	-	-	-	-	1	-	K7LGW9_SOYBN	UPI0002966681	-
GLYMA10G02330	10:1616095-1616095	T	upstream_gene_variant	MODIFIER	GLYMA10G02330.2	protein_coding	-	-	-	-	-	-	-	-1	-	K7LGX0_SOYBN	UPI0002968142	-
GLYMA10G02340	10:1616095-1616095	T	downstream_gene_variant	MODIFIER	GLYMA10G02340.1	protein_coding	-	-	-	-	-	-	-	-1	-	I1L7V6_SOYBN	UPI00023C9709	-
GLYMA10G02340	10:1616095-1616095	T	downstream_gene_variant	MODIFIER	GLYMA10G02340.2	protein_coding	-	-	-	-	-	-	-	-1	-	I1L7V7_SOYBN	UPI00023C970A	-
GLYMA10G02310	10:1616143-1616143	T	upstream_gene_variant	MODIFIER	GLYMA10G02310.1	protein_coding	-	-	-	-	-	-	-	-1	-	C6SWM9_SOYBN	UPI0001B14FEF	-
GLYMA10G02320	10:1616143-1616143	T	downstream_gene_variant	MODIFIER	GLYMA10G02320.1	protein_coding	-	-	-	-	-	-	-	1	-	K7LGW9_SOYBN	UPI0002966681	-
GLYMA10G02330	10:1616143-1616143	T	upstream_gene_variant	MODIFIER	GLYMA10G02330.2	protein_coding	-	-	-	-	-	-	-	-1	-	K7LGX0_SOYBN	UPI0002968142	-
GLYMA10G02340	10:1616143-1616143	T	downstream_gene_variant	MODIFIER	GLYMA10G02340.1	protein_coding	-	-	-	-	-	-	-	-1	-	I1L7V6_SOYBN	UPI00023C9709	-
GLYMA10G02340	10:1616143-1616143	T	downstream_gene_variant	MODIFIER	GLYMA10G02340.2	protein_coding	-	-	-	-	-	-	-	-1	-	I1L7V7_SOYBN	UPI00023C970A	-
GLYMA10G02320	10:1617136-1617136	A	downstream_gene_variant	MODIFIER	GLYMA10G02320.1	protein_coding	-	-	-	-	-	-	-	1	-	K7LGW9_SOYBN	UPI0002966681	-
GLYMA10G02330	10:1617136-1617136	A	upstream_gene_variant	MODIFIER	GLYMA10G02330.2	protein_coding	-	-	-	-	-	-	-	-1	-	K7LGX0_SOYBN	UPI0002968142	-
GLYMA10G02340	10:1617136-1617136	A	downstream_gene_variant	MODIFIER	GLYMA10G02340.1	protein_coding	-	-	-	-	-	-	-	-1	-	I1L7V6_SOYBN	UPI00023C9709	-
GLYMA10G02340	10:1617136-1617136	A	downstream_gene_variant	MODIFIER	GLYMA10G02340.2	protein_coding	-	-	-	-	-	-	-	-1	-	I1L7V7_SOYBN	UPI00023C970A	-
GLYMA10G02320	10:1617189-1617190	-	downstream_gene_variant	MODIFIER	GLYMA10G02320.1	protein_coding	-	-	-	-	-	-	-	1	-	K7LGW9_SOYBN	UPI0002966681	-
GLYMA10G02330	10:1617189-1617190	-	upstream_gene_variant	MODIFIER	GLYMA10G02330.2	protein_coding	-	-	-	-	-	-	-	-1	-	K7LGX0_SOYBN	UPI0002968142	-
GLYMA10G02340	10:1617189-1617190	-	downstream_gene_variant	MODIFIER	GLYMA10G02340.1	protein_coding	-	-	-	-	-	-	-	-1	-	I1L7V6_SOYBN	UPI00023C9709	-
GLYMA10G02340	10:1617189-1617190	-	downstream_gene_variant	MODIFIER	GLYMA10G02340.2	protein_coding	-	-	-	-	-	-	-	-1	-	I1L7V7_SOYBN	UPI00023C970A	-
GLYMA10G02320	10:1617633-1617633	T	downstream_gene_variant	MODIFIER	GLYMA10G02320.1	protein_coding	-	-	-	-	-	-	-	1	-	K7LGW9_SOYBN	UPI0002966681	-
GLYMA10G02330	10:1617633-1617633	T	upstream_gene_variant	MODIFIER	GLYMA10G02330.2	protein_coding	-	-	-	-	-	-	-	-1	-	K7LGX0_SOYBN	UPI0002968142	-
GLYMA10G02340	10:1617633-1617633	T	3_prime_UTR_variant	MODIFIER	GLYMA10G02340.1	protein_coding	GLYMA10G02340.1:c.*269dupA	-	1033-1034	-	-	-	-	-1	-	I1L7V6_SOYBN	UPI00023C9709	-
GLYMA10G02340	10:1617633-1617633	T	3_prime_UTR_variant	MODIFIER	GLYMA10G02340.2	protein_coding	GLYMA10G02340.2:c.*269dupA	-	1024-1025	-	-	-	-	-1	-	I1L7V7_SOYBN	UPI00023C970A	-
GLYMA10G02330	10:1619629-1619629	T	upstream_gene_variant	MODIFIER	GLYMA10G02330.2	protein_coding	-	-	-	-	-	-	-	-1	-	K7LGX0_SOYBN	UPI0002968142	-
GLYMA10G02340	10:1619629-1619629	T	intron_variant	MODIFIER	GLYMA10G02340.1	protein_coding	GLYMA10G02340.1:c.407+242dupA	-	-	-	-	-	-	-1	-	I1L7V6_SOYBN	UPI00023C9709	-
GLYMA10G02340	10:1619629-1619629	T	intron_variant	MODIFIER	GLYMA10G02340.2	protein_coding	GLYMA10G02340.2:c.398+242dupA	-	-	-	-	-	-	-1	-	I1L7V7_SOYBN	UPI00023C970A	-
GLYMA10G02350	10:1619629-1619629	T	upstream_gene_variant	MODIFIER	GLYMA10G02350.1	protein_coding	-	-	-	-	-	-	-	1	-	I1L7V8_SOYBN	UPI000233CF44	-
GLYMA10G02340	10:1623435-1623436	-	upstream_gene_variant	MODIFIER	GLYMA10G02340.1	protein_coding	-	-	-	-	-	-	-	-1	-	I1L7V6_SOYBN	UPI00023C9709	-
GLYMA10G02340	10:1623435-1623436	-	upstream_gene_variant	MODIFIER	GLYMA10G02340.2	protein_coding	-	-	-	-	-	-	-	-1	-	I1L7V7_SOYBN	UPI00023C970A	-
GLYMA10G02350	10:1623435-1623436	-	intron_variant	MODIFIER	GLYMA10G02350.1	protein_coding	GLYMA10G02350.1:c.145+94delA	-	-	-	-	-	-	1	-	I1L7V8_SOYBN	UPI000233CF44	-
GLYMA10G02360	10:1623435-1623436	-	downstream_gene_variant	MODIFIER	GLYMA10G02360.1	protein_coding	-	-	-	-	-	-	-	-1	-	I1L7V9_SOYBN	UPI000233CF4A	-
GLYMA10G02360	10:1623435-1623436	-	downstream_gene_variant	MODIFIER	GLYMA10G02360.2	protein_coding	-	-	-	-	-	-	-	-1	-	I1L7W0_SOYBN	UPI00023C970E	-
GLYMA10G02350	10:1627013-1627014	-	downstream_gene_variant	MODIFIER	GLYMA10G02350.1	protein_coding	-	-	-	-	-	-	-	1	-	I1L7V8_SOYBN	UPI000233CF44	-
GLYMA10G02360	10:1627013-1627014	-	downstream_gene_variant	MODIFIER	GLYMA10G02360.1	protein_coding	-	-	-	-	-	-	-	-1	-	I1L7V9_SOYBN	UPI000233CF4A	-
GLYMA10G02360	10:1627013-1627014	-	downstream_gene_variant	MODIFIER	GLYMA10G02360.2	protein_coding	-	-	-	-	-	-	-	-1	-	I1L7W0_SOYBN	UPI00023C970E	-
GLYMA10G02370	10:1627013-1627014	-	downstream_gene_variant	MODIFIER	GLYMA10G02370.1	protein_coding	-	-	-	-	-	-	-	-1	-	I1L7W1_SOYBN	UPI000233C504	-
GLYMA10G02370	10:1641974-1641974	T	upstream_gene_variant	MODIFIER	GLYMA10G02370.1	protein_coding	-	-	-	-	-	-	-	-1	-	I1L7W1_SOYBN	UPI000233C504	-
GLYMA10G02380	10:1647194-1647194	AGAGAATTGGCAACAGA	downstream_gene_variant	MODIFIER	GLYMA10G02380.1	protein_coding	-	-	-	-	-	-	-	-1	-	-	UPI0001890C50	-
GLYMA10G02390	10:1647194-1647194	AGAGAATTGGCAACAGA	downstream_gene_variant	MODIFIER	GLYMA10G02390.2	protein_coding	-	-	-	-	-	-	-	-1	-	K7LGX1_SOYBN	UPI000233C505	-
GLYMA10G02390	10:1647194-1647194	AGAGAATTGGCAACAGA	downstream_gene_variant	MODIFIER	GLYMA10G02390.3	protein_coding	-	-	-	-	-	-	-	-1	-	K7LGX2_SOYBN	UPI000295DE73	-
GLYMA10G02390	10:1647194-1647194	AGAGAATTGGCAACAGA	downstream_gene_variant	MODIFIER	GLYMA10G02390.4	protein_coding	-	-	-	-	-	-	-	-1	-	K7LGX3_SOYBN	UPI000294F76F	-
GLYMA10G02380	10:1650629-1650629	AGAGAGAGAG	intron_variant	MODIFIER	GLYMA10G02380.1	protein_coding	GLYMA10G02380.1:c.3+13_3+22dupCTCTCTCTCT	-	-	-	-	-	-	-1	-	-	UPI0001890C50	-
GLYMA10G02390	10:1650629-1650629	AGAGAGAGAG	downstream_gene_variant	MODIFIER	GLYMA10G02390.2	protein_coding	-	-	-	-	-	-	-	-1	-	K7LGX1_SOYBN	UPI000233C505	-
GLYMA10G02390	10:1650629-1650629	AGAGAGAGAG	downstream_gene_variant	MODIFIER	GLYMA10G02390.3	protein_coding	-	-	-	-	-	-	-	-1	-	K7LGX2_SOYBN	UPI000295DE73	-
GLYMA10G02390	10:1650629-1650629	AGAGAGAGAG	downstream_gene_variant	MODIFIER	GLYMA10G02390.4	protein_coding	-	-	-	-	-	-	-	-1	-	K7LGX3_SOYBN	UPI000294F76F	-
GLYMA10G02380	10:1651276-1651276	T	upstream_gene_variant	MODIFIER	GLYMA10G02380.1	protein_coding	-	-	-	-	-	-	-	-1	-	-	UPI0001890C50	-
GLYMA10G02390	10:1651276-1651276	T	downstream_gene_variant	MODIFIER	GLYMA10G02390.2	protein_coding	-	-	-	-	-	-	-	-1	-	K7LGX1_SOYBN	UPI000233C505	-
GLYMA10G02390	10:1651276-1651276	T	downstream_gene_variant	MODIFIER	GLYMA10G02390.3	protein_coding	-	-	-	-	-	-	-	-1	-	K7LGX2_SOYBN	UPI000295DE73	-
GLYMA10G02390	10:1651276-1651276	T	downstream_gene_variant	MODIFIER	GLYMA10G02390.4	protein_coding	-	-	-	-	-	-	-	-1	-	K7LGX3_SOYBN	UPI000294F76F	-
GLYMA10G02380	10:1651370-1651371	-	upstream_gene_variant	MODIFIER	GLYMA10G02380.1	protein_coding	-	-	-	-	-	-	-	-1	-	-	UPI0001890C50	-
GLYMA10G02390	10:1651370-1651371	-	downstream_gene_variant	MODIFIER	GLYMA10G02390.2	protein_coding	-	-	-	-	-	-	-	-1	-	K7LGX1_SOYBN	UPI000233C505	-
GLYMA10G02390	10:1651370-1651371	-	downstream_gene_variant	MODIFIER	GLYMA10G02390.3	protein_coding	-	-	-	-	-	-	-	-1	-	K7LGX2_SOYBN	UPI000295DE73	-
GLYMA10G02390	10:1651370-1651371	-	downstream_gene_variant	MODIFIER	GLYMA10G02390.4	protein_coding	-	-	-	-	-	-	-	-1	-	K7LGX3_SOYBN	UPI000294F76F	-
GLYMA10G02380	10:1651445-1651455	-	upstream_gene_variant	MODIFIER	GLYMA10G02380.1	protein_coding	-	-	-	-	-	-	-	-1	-	-	UPI0001890C50	-
GLYMA10G02390	10:1651445-1651455	-	downstream_gene_variant	MODIFIER	GLYMA10G02390.2	protein_coding	-	-	-	-	-	-	-	-1	-	K7LGX1_SOYBN	UPI000233C505	-
GLYMA10G02390	10:1651445-1651455	-	downstream_gene_variant	MODIFIER	GLYMA10G02390.3	protein_coding	-	-	-	-	-	-	-	-1	-	K7LGX2_SOYBN	UPI000295DE73	-
GLYMA10G02390	10:1651445-1651455	-	downstream_gene_variant	MODIFIER	GLYMA10G02390.4	protein_coding	-	-	-	-	-	-	-	-1	-	K7LGX3_SOYBN	UPI000294F76F	-
GLYMA10G02380	10:1652099-1652100	-	upstream_gene_variant	MODIFIER	GLYMA10G02380.1	protein_coding	-	-	-	-	-	-	-	-1	-	-	UPI0001890C50	-
GLYMA10G02390	10:1652099-1652100	-	downstream_gene_variant	MODIFIER	GLYMA10G02390.2	protein_coding	-	-	-	-	-	-	-	-1	-	K7LGX1_SOYBN	UPI000233C505	-
GLYMA10G02390	10:1652099-1652100	-	downstream_gene_variant	MODIFIER	GLYMA10G02390.3	protein_coding	-	-	-	-	-	-	-	-1	-	K7LGX2_SOYBN	UPI000295DE73	-
GLYMA10G02390	10:1652099-1652100	-	downstream_gene_variant	MODIFIER	GLYMA10G02390.4	protein_coding	-	-	-	-	-	-	-	-1	-	K7LGX3_SOYBN	UPI000294F76F	-
GLYMA10G02380	10:1652183-1652183	TAAA	upstream_gene_variant	MODIFIER	GLYMA10G02380.1	protein_coding	-	-	-	-	-	-	-	-1	-	-	UPI0001890C50	-
GLYMA10G02390	10:1652183-1652183	TAAA	3_prime_UTR_variant	MODIFIER	GLYMA10G02390.2	protein_coding	GLYMA10G02390.2:c.*338_*339insTTTA	-	3362-3363	-	-	-	-	-1	-	K7LGX1_SOYBN	UPI000233C505	-
GLYMA10G02390	10:1652183-1652183	TAAA	3_prime_UTR_variant	MODIFIER	GLYMA10G02390.3	protein_coding	GLYMA10G02390.3:c.*642_*643insTTTA	-	3366-3367	-	-	-	-	-1	-	K7LGX2_SOYBN	UPI000295DE73	-
GLYMA10G02390	10:1652183-1652183	TAAA	3_prime_UTR_variant	MODIFIER	GLYMA10G02390.4	protein_coding	GLYMA10G02390.4:c.*338_*339insTTTA	-	3011-3012	-	-	-	-	-1	-	K7LGX3_SOYBN	UPI000294F76F	-
GLYMA10G02380	10:1654290-1654290	TA	upstream_gene_variant	MODIFIER	GLYMA10G02380.1	protein_coding	-	-	-	-	-	-	-	-1	-	-	UPI0001890C50	-
GLYMA10G02390	10:1654290-1654290	TA	intron_variant	MODIFIER	GLYMA10G02390.2	protein_coding	GLYMA10G02390.2:c.2420+407_2420+408insTA	-	-	-	-	-	-	-1	-	K7LGX1_SOYBN	UPI000233C505	-
GLYMA10G02390	10:1654290-1654290	TA	intron_variant	MODIFIER	GLYMA10G02390.3	protein_coding	GLYMA10G02390.3:c.2420+407_2420+408insTA	-	-	-	-	-	-	-1	-	K7LGX2_SOYBN	UPI000295DE73	-
GLYMA10G02390	10:1654290-1654290	TA	intron_variant	MODIFIER	GLYMA10G02390.4	protein_coding	GLYMA10G02390.4:c.1970+407_1970+408insTA	-	-	-	-	-	-	-1	-	K7LGX3_SOYBN	UPI000294F76F	-
GLYMA10G02390	10:1656328-1656328	C	intron_variant	MODIFIER	GLYMA10G02390.2	protein_coding	GLYMA10G02390.2:c.1822-45dupG	-	-	-	-	-	-	-1	-	K7LGX1_SOYBN	UPI000233C505	-
GLYMA10G02390	10:1656328-1656328	C	intron_variant	MODIFIER	GLYMA10G02390.3	protein_coding	GLYMA10G02390.3:c.1822-45dupG	-	-	-	-	-	-	-1	-	K7LGX2_SOYBN	UPI000295DE73	-
GLYMA10G02390	10:1656328-1656328	C	intron_variant	MODIFIER	GLYMA10G02390.4	protein_coding	GLYMA10G02390.4:c.1372-45dupG	-	-	-	-	-	-	-1	-	K7LGX3_SOYBN	UPI000294F76F	-
GLYMA10G02400	10:1656328-1656328	C	downstream_gene_variant	MODIFIER	GLYMA10G02400.1	protein_coding	-	-	-	-	-	-	-	-1	-	I1L7W4_SOYBN	UPI000233C506	-
GLYMA10G02390	10:1660953-1660953	TT	upstream_gene_variant	MODIFIER	GLYMA10G02390.2	protein_coding	-	-	-	-	-	-	-	-1	-	K7LGX1_SOYBN	UPI000233C505	-
GLYMA10G02390	10:1660953-1660953	TT	upstream_gene_variant	MODIFIER	GLYMA10G02390.3	protein_coding	-	-	-	-	-	-	-	-1	-	K7LGX2_SOYBN	UPI000295DE73	-
GLYMA10G02390	10:1660953-1660953	TT	upstream_gene_variant	MODIFIER	GLYMA10G02390.4	protein_coding	-	-	-	-	-	-	-	-1	-	K7LGX3_SOYBN	UPI000294F76F	-
GLYMA10G02400	10:1660953-1660953	TT	3_prime_UTR_variant	MODIFIER	GLYMA10G02400.1	protein_coding	GLYMA10G02400.1:c.*206_*207dupAA	-	4081-4082	-	-	-	-	-1	-	I1L7W4_SOYBN	UPI000233C506	-
GLYMA10G02400	10:1672248-1672248	CGT	inframe_insertion	MODERATE	GLYMA10G02400.1	protein_coding	GLYMA10G02400.1:c.352_354dupACG	GLYMA10G02400.1:p.Thr118dup	484-485	354-355	118-119	-/T	-/ACG	-1	-	I1L7W4_SOYBN	UPI000233C506	-
GLYMA10G02410	10:1693704-1693704	G	upstream_gene_variant	MODIFIER	GLYMA10G02410.2	protein_coding	-	-	-	-	-	-	-	-1	-	K7LGX4_SOYBN	UPI00029631C7	-
GLYMA10G02430	10:1699329-1699329	GACAG	upstream_gene_variant	MODIFIER	GLYMA10G02430.1	protein_coding	-	-	-	-	-	-	-	1	-	I1L7W6_SOYBN	UPI0001BA864A	-
GLYMA10G02440	10:1712183-1712183	A	3_prime_UTR_variant	MODIFIER	GLYMA10G02440.1	protein_coding	-	-	2163-2164	-	-	-	-	1	-	-	UPI000189D6A9	-
GLYMA10G02440	10:1712539-1712540	-	downstream_gene_variant	MODIFIER	GLYMA10G02440.1	protein_coding	-	-	-	-	-	-	-	1	-	-	UPI000189D6A9	-
GLYMA10G02440	10:1712557-1712558	-	downstream_gene_variant	MODIFIER	GLYMA10G02440.1	protein_coding	-	-	-	-	-	-	-	1	-	-	UPI000189D6A9	-
GLYMA10G02440	10:1713048-1713048	CT	downstream_gene_variant	MODIFIER	GLYMA10G02440.1	protein_coding	-	-	-	-	-	-	-	1	-	-	UPI000189D6A9	-
GLYMA10G02440	10:1716048-1716048	T	downstream_gene_variant	MODIFIER	GLYMA10G02440.1	protein_coding	-	-	-	-	-	-	-	1	-	-	UPI000189D6A9	-
GLYMA10G02451	10:1727485-1727485	TT	upstream_gene_variant	MODIFIER	GLYMA10G02451.1	protein_coding	-	-	-	-	-	-	-	-1	-	C6T322_SOYBN	UPI0001B15306	-
GLYMA10G02460	10:1727485-1727485	TT	downstream_gene_variant	MODIFIER	GLYMA10G02460.1	protein_coding	-	-	-	-	-	-	-	-1	-	I1L7W8_SOYBN	UPI000233D0D4	-
GLYMA10G02451	10:1727901-1727901	TTT	upstream_gene_variant	MODIFIER	GLYMA10G02451.1	protein_coding	-	-	-	-	-	-	-	-1	-	C6T322_SOYBN	UPI0001B15306	-
GLYMA10G02460	10:1727901-1727901	TTT	downstream_gene_variant	MODIFIER	GLYMA10G02460.1	protein_coding	-	-	-	-	-	-	-	-1	-	I1L7W8_SOYBN	UPI000233D0D4	-
GLYMA10G02451	10:1727981-1727981	T	upstream_gene_variant	MODIFIER	GLYMA10G02451.1	protein_coding	-	-	-	-	-	-	-	-1	-	C6T322_SOYBN	UPI0001B15306	-
GLYMA10G02460	10:1727981-1727981	T	downstream_gene_variant	MODIFIER	GLYMA10G02460.1	protein_coding	-	-	-	-	-	-	-	-1	-	I1L7W8_SOYBN	UPI000233D0D4	-
GLYMA10G02460	10:1728653-1728653	G	downstream_gene_variant	MODIFIER	GLYMA10G02460.1	protein_coding	-	-	-	-	-	-	-	-1	-	I1L7W8_SOYBN	UPI000233D0D4	-
GLYMA10G02460	10:1728942-1728942	C	downstream_gene_variant	MODIFIER	GLYMA10G02460.1	protein_coding	-	-	-	-	-	-	-	-1	-	I1L7W8_SOYBN	UPI000233D0D4	-
GLYMA10G02460	10:1729332-1729332	G	downstream_gene_variant	MODIFIER	GLYMA10G02460.1	protein_coding	-	-	-	-	-	-	-	-1	-	I1L7W8_SOYBN	UPI000233D0D4	-
GLYMA10G02460	10:1730196-1730196	CAAGTCA	downstream_gene_variant	MODIFIER	GLYMA10G02460.1	protein_coding	-	-	-	-	-	-	-	-1	-	I1L7W8_SOYBN	UPI000233D0D4	-
GLYMA10G02460	10:1731602-1731602	A	downstream_gene_variant	MODIFIER	GLYMA10G02460.1	protein_coding	-	-	-	-	-	-	-	-1	-	I1L7W8_SOYBN	UPI000233D0D4	-
GLYMA10G02470	10:1731602-1731602	A	upstream_gene_variant	MODIFIER	GLYMA10G02470.2	protein_coding	-	-	-	-	-	-	-	1	-	K7LGX6_SOYBN	UPI0002958E13	-
GLYMA10G02460	10:1733950-1733950	ATATA	upstream_gene_variant	MODIFIER	GLYMA10G02460.1	protein_coding	-	-	-	-	-	-	-	-1	-	I1L7W8_SOYBN	UPI000233D0D4	-
GLYMA10G02470	10:1733950-1733950	ATATA	upstream_gene_variant	MODIFIER	GLYMA10G02470.2	protein_coding	-	-	-	-	-	-	-	1	-	K7LGX6_SOYBN	UPI0002958E13	-
GLYMA10G02460	10:1733977-1733979	-	upstream_gene_variant	MODIFIER	GLYMA10G02460.1	protein_coding	-	-	-	-	-	-	-	-1	-	I1L7W8_SOYBN	UPI000233D0D4	-
GLYMA10G02470	10:1733977-1733979	-	upstream_gene_variant	MODIFIER	GLYMA10G02470.2	protein_coding	-	-	-	-	-	-	-	1	-	K7LGX6_SOYBN	UPI0002958E13	-
GLYMA10G02460	10:1734476-1734476	T	upstream_gene_variant	MODIFIER	GLYMA10G02460.1	protein_coding	-	-	-	-	-	-	-	-1	-	I1L7W8_SOYBN	UPI000233D0D4	-
GLYMA10G02470	10:1734476-1734476	T	upstream_gene_variant	MODIFIER	GLYMA10G02470.2	protein_coding	-	-	-	-	-	-	-	1	-	K7LGX6_SOYBN	UPI0002958E13	-
GLYMA10G02460	10:1734620-1734620	ATATAT	upstream_gene_variant	MODIFIER	GLYMA10G02460.1	protein_coding	-	-	-	-	-	-	-	-1	-	I1L7W8_SOYBN	UPI000233D0D4	-
GLYMA10G02470	10:1734620-1734620	ATATAT	upstream_gene_variant	MODIFIER	GLYMA10G02470.2	protein_coding	-	-	-	-	-	-	-	1	-	K7LGX6_SOYBN	UPI0002958E13	-
GLYMA10G02460	10:1734996-1734996	AGG	upstream_gene_variant	MODIFIER	GLYMA10G02460.1	protein_coding	-	-	-	-	-	-	-	-1	-	I1L7W8_SOYBN	UPI000233D0D4	-
GLYMA10G02470	10:1734996-1734996	AGG	upstream_gene_variant	MODIFIER	GLYMA10G02470.2	protein_coding	-	-	-	-	-	-	-	1	-	K7LGX6_SOYBN	UPI0002958E13	-
GLYMA10G02460	10:1737745-1737745	TT	upstream_gene_variant	MODIFIER	GLYMA10G02460.1	protein_coding	-	-	-	-	-	-	-	-1	-	I1L7W8_SOYBN	UPI000233D0D4	-
[truncated: 695,315 more rows]
