# Supplementary material for: Genome-wide identification and characterization of InDels and SNPs in Glycine max and Glycine soja for contrasting seed permeability traits
Source: BMC Plant Biol. 2018 Jul 9;18:141. doi: 10.1186/s12870-018-1341-2 (PMC6038289; doi:10.1186/s12870-018-1341-2)
Supplement: Supplementary file 5 — Functional classification of non-synonymous SNPs and InDels into diverse pathways. (XLS 636 kb) [file 12870_2018_1341_MOESM5_ESM.xls]

## Sheet: G. max_Non-synonymous_SNPs_KEGG
Gene ID	Uniprot ID	KEGG pathway (No of genes with Non-Synonymous SNPs)	Uniprot ID	Gene
Glyma05g16366	K7KP37	gmx01100 Metabolic pathways (18)	I1JI88	100776483 phosphoinositide phospholipase C 6-like
Glyma04g26810	K7KK95		I1KJS2	100776597 ATP-dependent 6-phosphofructokinase 3
Glyma11g33922	K7LRJ1		K7MD49	100776781 probable pectinesterase/pectinesterase inhibitor 47
Glyma15g38113	K7MDH9		I1MSN6	100777007 spermidine hydroxycinnamoyl transferase-like
Glyma20g26660	K7N373		I1MJJ9	100780342 DNA-directed RNA polymerases II, IV and V subunit 8B-like
Glyma17g10960	K7MKX1		I1JIN7	100781659 abscisic-aldehyde oxidase
Glyma11g17480	K7LQ05		K7M700	100782844 NAD kinase 2, chloroplastic-like
Glyma02g15620	K7K889		I1JLC7	100786290 AMP deaminase-like
Glyma10g42370	K7LLU7		I1MRL0	100800194 pectinesterase/pectinesterase inhibitor-like
Glyma10g21110	K7LIQ5		I1JCQ7	100802169 succinate dehydrogenase [ubiquinone] flavoprotein subunit 1, mitochondrial
Glyma08g29140	K7L8Y1		K7LVZ2	100806124 probable terpene synthase 11
Glyma06g30604	K7KWN8		K7LVZ0	100807904 probable terpene synthase 11
Glyma08g47870	I1KZJ7		I1N447	100809120 2-dehydro-3-deoxyphosphooctonate aldolase-like
Glyma01g42760	K7K565		I1KLK0	100810270 linoleate 13S-lipoxygenase 3-1, chloroplastic-like
Glyma15g38120	Q2PMR3		I1JJI8	100813382 pectinesterase QRT1-like
Glyma18g17565	K7MRU4		P02957	3989259 psbA; photosystem II protein D1
Glyma18g32241	K7MSH9		Q2PMU9	3989273 atpE; ATP synthase epsilon chain
Glyma06g43553	K7KXV4		P0CC62	3989377 ndhB; NADH dehydrogenase subunit 2
Glyma05g19661	P0CC62	gmx01110 Biosynthesis of secondary metabolites (10)	I1KJS2	100776597 ATP-dependent 6-phosphofructokinase 3
Glyma10g28710	I1LB34		I1NAE3	100776894 UDP-glycosyltransferase 73C2-like
Glyma16g24711	K7MH53		I1MSN6	100777007 spermidine hydroxycinnamoyl transferase-like
Glyma19g23640	I1N7I9		I1JIN7	100781659 abscisic-aldehyde oxidase
Glyma02g31971	Q2PMU9		I1JLC7	100786290 AMP deaminase-like
Glyma07g36805	K7L3J6		I1JCQ7	100802169 succinate dehydrogenase [ubiquinone] flavoprotein subunit 1, mitochondrial
Glyma15g05551	K7M9P4		I1M3J1	100805270 gibberellin 2-beta-dioxygenase 8-like
Glyma06g38865	K7KX91		K7LVZ2	100806124 probable terpene synthase 11
Glyma18g32250	ATCG01060		K7LVZ0	100807904 probable terpene synthase 11
Glyma05g38231	K7KS64		I1KLK0	100810270 linoleate 13S-lipoxygenase 3-1, chloroplastic-like
Glyma10g07831	K7LHT8	gmx04075 Plant hormone signal transduction (4)	I1LZL8	100795697 two-component response regulator ARR12-like
Glyma10g06751	K7LHP1		K7LSV0	100803474 auxin-responsive protein SAUR21-like
Glyma11g19285	K7LQ77		I1KLU0	100805830 mitogen-activated protein kinase homolog MMK1-like
Glyma14g23702	K7M6V8		I1MYT5	100817300 putative ETHYLENE INSENSITIVE 3-like 4 protein
Glyma04g40823	C6T3M7	gmx00040 Pentose and glucuronate interconversions (3)	K7MD49	100776781 probable pectinesterase/pectinesterase inhibitor 47
Glyma18g17595	K7MRU5		I1MRL0	100800194 pectinesterase/pectinesterase inhibitor-like
Glyma03g29080	I1JNB1		I1JJI8	100813382 pectinesterase QRT1-like
Glyma10g05780		gmx00190 Oxidative phosphorylation (3)	I1JCQ7	100802169 succinate dehydrogenase [ubiquinone] flavoprotein subunit 1, mitochondrial
Glyma17g23855	K7MMF8		Q2PMU9	3989273 atpE; ATP synthase epsilon chain
Glyma10g07935	K7LHU4		P0CC62	3989377 ndhB; NADH dehydrogenase subunit 2
Glyma14g27965	K7M783	gmx04626 Plant-pathogen interaction (2)	I1KYA7	100802130 disease resistance protein RPM1-like
Glyma18g09621	K7MQP9		I1JHM5	100817278 pathogenesis-related genes transcriptional activator PTI6-like
Glyma19g37132	K7MZ46	gmx04016 MAPK signaling pathway - plant (2)	I1KLU0	100805830 mitogen-activated protein kinase homolog MMK1-like
Glyma08g25605	K7L8F1		I1MYT5	100817300 putative ETHYLENE INSENSITIVE 3-like 4 protein
Glyma02g39421	K7KA80	gmx03010 Ribosome (2)	Q2PMR3	3989319 rpl33; ribosomal protein L33
Glyma10g09557	K7LI06		Q2PMR2	3989320 rps18; 30S ribosomal protein S18
Glyma06g21440	I1KCX1	gmx00902 Monoterpenoid biosynthesis (2)	K7LVZ2	100806124 probable terpene synthase 11
Glyma19g07557	K7MWR1		K7LVZ0	100807904 probable terpene synthase 11
Glyma15g39454	K7MDP0	gmx00230 Purine metabolism (2)	I1MJJ9	100780342 DNA-directed RNA polymerases II, IV and V subunit 8B-like
Glyma08g38510	I1KX98		I1JLC7	100786290 AMP deaminase-like
Glyma01g24811	K7K2Z7	gmx01200 Carbon metabolism (2)	I1KJS2	100776597 ATP-dependent 6-phosphofructokinase 3
Glyma06g43961	K7KXZ0		I1JCQ7	100802169 succinate dehydrogenase [ubiquinone] flavoprotein subunit 1, mitochondrial
Glyma15g38125	Q2PMR2	gmx00195 Photosynthesis (2)	P02957	3989259 psbA; photosystem II protein D1
Glyma20g02071	K7N0S7		Q2PMU9	3989273 atpE; ATP synthase epsilon chain
Glyma05g18376	K7KP68	gmx00904 Diterpenoid biosynthesis (1)	I1M3J1	100805270 gibberellin 2-beta-dioxygenase 8-like
Glyma06g20310	I1KCQ0	gmx00592 alpha-Linolenic acid metabolism (1)	I1KLK0	100810270 linoleate 13S-lipoxygenase 3-1, chloroplastic-like
Glyma14g12194	K7M623	gmx04933 AGE-RAGE signaling pathway in diabetic complications (1)	I1JI88	100776483 phosphoinositide phospholipase C 6-like
Glyma18g14191	K7MRD6	gmx00760 Nicotinate and nicotinamide metabolism (1)	K7M700	100782844 NAD kinase 2, chloroplastic-like
Glyma02g03655	K7K666	gmx00052 Galactose metabolism (1)	I1KJS2	100776597 ATP-dependent 6-phosphofructokinase 3
Glyma12g03771	K7LSV0	gmx00940 Phenylpropanoid biosynthesis (1)	I1MSN6	100777007 spermidine hydroxycinnamoyl transferase-like
Glyma17g23811	K7MMF3	gmx00520 Amino sugar and nucleotide sugar metabolism (1)	I1N8L7	100787734 alpha-L-arabinofuranosidase 1-like
Glyma01g40985	ATCG00360	gmx00051 Fructose and mannose metabolism (1)	I1KJS2	100776597 ATP-dependent 6-phosphofructokinase 3
Glyma03g29180	K7KEV0	gmx01230 Biosynthesis of amino acids (1)	I1KJS2	100776597 ATP-dependent 6-phosphofructokinase 3
Glyma05g18326	AT2G34520	gmx00020 Citrate cycle (TCA cycle) (1)	I1JCQ7	100802169 succinate dehydrogenase [ubiquinone] flavoprotein subunit 1, mitochondrial
Glyma18g07160	K7MQA5	gmx04144 Endocytosis (1)	I1KJU0	100796620 uncharacterized LOC100796620
Glyma04g40170	I1JYD1	gmx00941 Flavonoid biosynthesis (1)	I1MSN6	100777007 spermidine hydroxycinnamoyl transferase-like
Glyma14g12202	K7M624	gmx03020 RNA polymerase (1)	I1MJJ9	100780342 DNA-directed RNA polymerases II, IV and V subunit 8B-like
Glyma14g40110	I1MC10	gmx03018 RNA degradation (1)	I1KJS2	100776597 ATP-dependent 6-phosphofructokinase 3
Glyma03g22003	K7KDV4	gmx00906 Carotenoid biosynthesis (1)	I1JIN7	100781659 abscisic-aldehyde oxidase
Glyma01g02295	K7K1B3	gmx04070 Phosphatidylinositol signaling system (1)	I1JI88	100776483 phosphoinositide phospholipase C 6-like
Glyma15g16041	K7MBF4	gmx00010 Glycolysis / Gluconeogenesis (1)	I1KJS2	100776597 ATP-dependent 6-phosphofructokinase 3
Glyma18g14501	K7MRE7	gmx00562 Inositol phosphate metabolism (1)	I1JI88	100776483 phosphoinositide phospholipase C 6-like
Glyma19g16660	AT5G24170	gmx00240 Pyrimidine metabolism (1)	I1MJJ9	100780342 DNA-directed RNA polymerases II, IV and V subunit 8B-like
Glyma05g16213	K7KP34	gmx00945 Stilbenoid, diarylheptanoid and gingerol biosynthesis (1)	I1MSN6	100777007 spermidine hydroxycinnamoyl transferase-like
Glyma05g16286	K7KP35	gmx00591 Linoleic acid metabolism (1)	I1KLK0	100810270 linoleate 13S-lipoxygenase 3-1, chloroplastic-like
Glyma07g03550	I1KH30	gmx00030 Pentose phosphate pathway (1)	I1KJS2	100776597 ATP-dependent 6-phosphofructokinase 3
Glyma03g12080	I1JLM5
Glyma07g06943	K7KZZ9
Glyma16g06645	K7MFG4
Glyma18g19080	I1N1G9
Glyma02g08780	K7K713
Glyma01g06740	C6TFB5
Glyma15g11583	K7MAS3
Glyma15g42430	I1MJJ9
Glyma05g09390	I1K1Q3
Glyma12g06606	K7LTB3
Glyma04g10151	K7KJ53
Glyma14g39435	K7M8E2
Glyma03g25790	C6SY94
Glyma06g47810	I1KFT5
Glyma18g46320	I1N3M0
Glyma08g42985	K7LA51
Glyma09g30390	C6T3D6
Glyma19g37840	I1NAL9
Glyma05g34870	I1K5N7
Glyma18g07825	K7MQE2
Glyma10g02100	I1L7T5
Glyma14g07221	K7M5B0
Glyma14g34080	I1MAQ2
Glyma15g12841	K7MAY0
Glyma11g08601	K7LNL6
Glyma18g09190	K7MQN0
Glyma09g06491	K7LC12
Glyma04g08040	K7KIR2
Glyma03g03685	K7KCJ4
Glyma09g11835	K7LCP6
Glyma13g38621	K7M2X5
Glyma06g46021	K7KYA4
Glyma10g20994	K7LIQ2
Glyma17g35396	K7MNL3
Glyma13g24901	K7M0D6
Glyma15g21400	I1MHP1
Glyma09g34590	K7LF74
Glyma17g03930	I1MRS6
Glyma20g02270	C6T3P3
Glyma06g41342	K7KXK1
Glyma13g32200	I1M2E6
Glyma16g04500	C6F120
Glyma18g32201	Q2PMP0
Glyma08g41251	ATMG00270
Glyma01g06030	I1J5S5
Glyma10g28610	I1LB22
Glyma20g36100	I1NII7
Glyma02g38601	K7KA39
Glyma18g50450	I1N4M5
Glyma16g07081	Q2PMM5
Glyma15g21361	K7MCC0
Glyma03g29301	K7KEV8
Glyma16g24381	K7MH30
Glyma01g35681	K7K415
Glyma12g04570	K7LSY6
Glyma20g03473	K7N111
Glyma19g10150	K7MWU8
Glyma17g10770	C6TL10
Glyma15g35120	I1MIH6
Glyma08g45130	I1KYU0
Glyma13g27000	K7M0S7
Glyma16g01820	I1MK90
Glyma05g18393	K7KP69
Glyma18g48370	I1N447
Glyma16g07230	K7MFJ9
Glyma11g06711	K7LNC6
Glyma02g40320	I1JHM5
Glyma20g36490	I1NIM3
Glyma12g04580	I1LQ21
Glyma13g15560	P02957
Glyma08g27633	K7L8R1
Glyma19g38340	K7MZA2
Glyma12g30561	K7LVN4
Glyma16g31630	K7MIF2
Glyma18g20485	K7MS23
Glyma06g05980	I1K8H7
Glyma14g24650	K7M711
Glyma06g19380	I1KCG1
Glyma15g17968	K7MBU4
Glyma06g03441	K7KST9
Glyma06g41180	I1KEC7
Glyma19g33070	I1N995
Glyma06g20230	I1KCP4
Glyma19g42180	I1NBX9
Glyma01g06290	I1J5U2
Glyma09g08670	I1L1V3
Glyma09g32801	K7LEW1
Glyma18g05060	K7MPW5
Glyma03g31000	I1JNU1
Glyma03g01960	I1JKF4
Glyma15g37451	K7MDE3
Glyma05g23080	I1K2H1
Glyma13g36360	I1M3J1
Glyma08g01890	I1KPB9
Glyma06g40790	I1KEA0
Glyma19g02090	I1N608
Glyma02g46890	I1JJI8
Glyma18g43550	K7MTM5
Glyma13g35091	K7M2B2
Glyma18g05050	I1MZI3
Glyma02g42110	AT3G55780
Glyma11g38080	K7LS56
Glyma05g18342	K7KP66
Glyma08g27210	I1KWG6
Glyma18g48980	I1N498
Glyma18g47070	I1N3T4
Glyma03g16450	I1JLY4
Glyma06g43590	K7KXV5
Glyma15g42450	K7ME56
Glyma06g39444	K7KXA4
Glyma11g35362	K7LRR3
Glyma18g32211	K7MSH6
Glyma07g15170	I1KJS2
Glyma18g48070	K7MUI7
Glyma06g41276	K7KXJ4
Glyma11g10310	I1LIP2
Glyma14g04960	K7M4X0
Glyma17g05420	I1MS74
Glyma02g39070	I1JHB9
Glyma07g32200	I1KLP8
Glyma10g41730	I1LET6
Glyma12g10880	I1LRS5
Glyma18g13790	K7MRC2
Glyma06g03560	K7KSU7
Glyma15g17410	K7MBP7
Glyma17g35480	I1MXJ0
Glyma08g46360	I1KZ48
Glyma13g26940	I1M0U6
Glyma04g36870	K7KL44
Glyma12g31060	I1LTW2
Glyma15g37475	K7MDE4
Glyma07g32750	I1KLU0
Glyma18g51960	I1N4Z4
Glyma18g50340	I1N4L4
Glyma06g05530	I1K8D6
Glyma03g30600	I1JNQ4
Glyma16g27950	I1MP48
Glyma08g23470	K7L830
Glyma13g23280	K7M068
Glyma07g01851	K7KZ22
Glyma17g06850	I1MSN6
Glyma14g39260	I1MBT1
Glyma18g02190	I1MYT5
Glyma11g18455	K7LQ45
Glyma15g18241	K7MBW3
Glyma18g03066	K7MPJ2
Glyma12g00880	K7LSA1
Glyma12g32370	K7LVZ0
Glyma14g04900	K7M4W3
Glyma18g15050	I1N151
Glyma16g03680	I1MKT0
Glyma18g45530	K7MU16
Glyma04g22020	K7KK36
Glyma06g41318	K7KXJ8
Glyma19g37100	I1NAE3
Glyma02g03810	I1JC13
Glyma18g33230	I1N203
Glyma06g37950	K7KX52
Glyma12g31480	I1LTZ9
Glyma06g46150	I1KFC7
Glyma07g06990	I1KI31
Glyma05g32756	K7KR78
Glyma14g27316	K7M769
Glyma19g36300	I1NA68
Glyma05g25470	I1K2W9
Glyma03g33590	I1JPJ9
Glyma05g35350	I1K5U2
Glyma07g10680	K7L0N3
Glyma04g42280	K7KM50
Glyma18g48600	I1N464
Glyma18g07260	K7MQA8
Glyma18g40211	K7MT70
Glyma05g36580	AT4G24040
Glyma18g51210	I1N4T6
Glyma11g11110	AT1G50270
Glyma01g00750	I1J4E0
Glyma06g40820	K7KXG4
Glyma19g30900	K7MY45
Glyma05g21800	K7KPD0
Glyma17g03170	I1MRL0
Glyma13g26680	AT5G59980
Glyma12g32381	K7LVZ2
Glyma18g03610	K7MPM9
Glyma02g42410	I1JI88
Glyma11g37091	K7LRZ8
Glyma13g25260	I1M0E6
Glyma07g22340	K7L258
Glyma06g22781	K7KW97
Glyma02g33550	I1JGB3
Glyma06g44770	K7KY34
Glyma06g37080	I1KDV9
Glyma16g31712	K7MIF7
Glyma02g06400	I1JCQ7
Glyma18g48940	I1N494
Glyma14g35750	I1MAY4
Glyma17g32492	K7MN49
Glyma19g30460	I1N8L7
Glyma03g12251	K7KDE5
Glyma19g12250	K7MWW7
Glyma05g09200	AT4G38270
Glyma05g29901	K7KQM8
Glyma19g36140	I1NA46
Glyma06g44880	K7KY43
Glyma18g48970	K7MUQ0
Glyma13g22320	I1LZL8
Glyma15g35290	K7MD49
Glyma18g18220	K7MRX0
Glyma04g09080	I1JUX3
Glyma02g05036	K7K6F8
Glyma07g16001	K7L1H4
Glyma03g03120	I1JKP1
Glyma11g03210	I1LGL0
Glyma15g39380	K7MDN5
Glyma07g19040	K7L1Y4
Glyma09g07020	K7LC39
Glyma14g04590	I1M7A7
Glyma03g29250	I1JNC4
Glyma08g257104
Glyma08g257103
Glyma06g41150	I1KEC5
Glyma08g257102
Glyma13g06620	I1LWU9
Glyma08g257101
Glyma18g48900	I1N490
Glyma03g24216	K7KE48
Glyma17g06280	I1MSH3
Glyma03g07460	I1JLC7
Glyma13g40740	K7M3B1
Glyma01g05820	K7K1U7
Glyma05g08230	I1K1D3
Glyma02g46260	K7KBH1
Glyma18g45131	K7MTY2
Glyma08g43170	I1KYA7
Glyma07g31660	I1KLK0
Glyma04g09965	K7KJ35
Glyma08g257100
Glyma16g23452	K7MGY7
Glyma11g15841	AT1G07910
Glyma05g29530	I1K437
Glyma18g01610	K7MPC6
Glyma12g36510	K7LWL6
Glyma03g07181	K7KD11
Glyma07g15350	I1KJU0
Glyma02g39200	I1JHD0
Glyma01g00510	I1J4B0
Glyma09g06260	I1L1A5
Glyma15g23411	K7MCJ4
Glyma14g24545	K7M700
Glyma06g41290	K7KXJ5
Glyma14g11883	K7M605
Glyma06g40980	I1KEB4
Glyma19g07680	K7MWR8
Glyma08g20581	K7L7M1
Glyma18g09120	K7MQM6
Glyma08g25710	AT4G09680
Glyma16g27290	I1MNY3
Glyma13g26250	I1M0N7
Glyma01g45670	AT1G76630
Glyma02g46630	I1JJG1
Glyma03g04780	I1JL05
Glyma01g36950	I1J8J8
Glyma06g41380	K7KXK5
Glyma02g44000	I1JIN7
Glyma13g11614	K7LYE7
Glyma18g46120	K7MU55
Glyma06g01070	AT2G16485
Glyma15g39642	K7MDR5
Glyma09g01705	K7LB94
Glyma15g39420	K7MDN8
Glyma07g07015	K7L003
Glyma07g07150	I1KI44
Glyma07g07075	K7L009
Glyma13g24305	K7M0B1
Glyma16g25932	K7MHD3

## Sheet: G.soja_Non_Synonymous_SNPs_KEGG
Gene ID	Uniprot ID	KEGG pathway (No of genes with Non-Synonymous SNPs)	Uniprot ID	Gene
GLYMA03G24830	K7KE76	gmx01100 Metabolic pathways (16)	C6T2Z9	100775415 DNA-directed RNA polymerase subunit 10-like protein
GLYMA08G47860	K7LAX1		I1KJ50	100775694 prostaglandin E synthase 2
GLYMA14G14210	K7M6B5		I1KFQ1	100776585 8-amino-7-oxononanoate synthase-like
GLYMA14G14230	K7M6B6		I1JRC1	100777934 DNA polymerase zeta catalytic subunit
GLYMA01G29440	K7K3C1		I1JRF8	100778473 glutathione synthetase, chloroplastic-like
GLYMA08G44980	K7LAH2		I1K9R1	100780483 argininosuccinate lyase, chloroplastic-like
GLYMA04G39300	K7KLI6		K7L1E9	100785514 1-aminocyclopropane-1-carboxylate oxidase 1-like
GLYMA14G16655	K7M6H3		I1LKB8	100787387 arogenate dehydratase/prephenate dehydratase 2, chloroplastic-like
GLYMA07G37580	K7L3M9		K7KIL6	100787937 probable 1-deoxy-D-xylulose-5-phosphate synthase, chloroplastic
GLYMA14G39800	K7M8H1		I1MD11	100790833 5'-nucleotidase SurE-like
GLYMA13G21610	K7LZW3		I1KDB7	100794836 putative GPI-anchor transamidase
GLYMA12G10870	K7LU04		I1KZW7	100797925 pyrophosphate--fructose 6-phosphate 1-phosphotransferase subunit beta
GLYMA18G08750	I1N0B4		I1JMI9	100799344 NAD-dependent malic enzyme 62 kDa isoform, mitochondrial
GLYMA18G50950	I1N4R2		I1JEC1	100803057 heparanase-like protein 2
GLYMA01G40960	I1J9M1		I1N0Y1	100815533 imidazole glycerol phosphate synthase hisHF, chloroplastic-like
GLYMA10G20956	K7LIQ1		K7KQK7	100816642 alpha,alpha-trehalose-phosphate synthase [UDP-forming] 1-like
GLYMA15G16860	K7MBK3	gmx01110 Biosynthesis of secondary metabolites (8)	I1K9R1	100780483 argininosuccinate lyase, chloroplastic-like
GLYMA06G30612	K7KWN9		K7L1E9	100785514 1-aminocyclopropane-1-carboxylate oxidase 1-like
GLYMA16G17554	K7MGD0		I1LKB8	100787387 arogenate dehydratase/prephenate dehydratase 2, chloroplastic-like
GLYMA06G05330	K7KT67		K7KIL6	100787937 probable 1-deoxy-D-xylulose-5-phosphate synthase, chloroplastic
GLYMA14G25450	I1MAA4		I1MD11	100790833 5'-nucleotidase SurE-like
GLYMA02G02150	K7K5Y3		I1KZW7	100797925 pyrophosphate--fructose 6-phosphate 1-phosphotransferase subunit beta
GLYMA10G25956	K7LJ36		I1N0Y1	100815533 imidazole glycerol phosphate synthase hisHF, chloroplastic-like
GLYMA18G17565	K7MRU4		K7MLN5	106796737 gibberellin 2-beta-dioxygenase 8-like
GLYMA02G38225	K7KA11	gmx04075 Plant hormone signal transduction (4)	I1M912	100778183 abscisic acid receptor PYL2-like
GLYMA07G17116	K7L1M9		K7LB30	100795799 ethylene receptor
GLYMA01G40790	K7K4U3		K7MYP4	100801682 ethylene-responsive transcription factor 1B-like
GLYMA04G06615	K7KIF7		I1K5P7	100807043 protein TIFY 6B
GLYMA07G33670	K7L310	gmx04016 MAPK signaling pathway - plant (4)	K7K581	100777350 mitogen-activated protein kinase kinase kinase YODA-like
GLYMA19G29955	K7MXZ3		I1M912	100778183 abscisic acid receptor PYL2-like
GLYMA06G43553	K7KXV4		K7LB30	100795799 ethylene receptor
GLYMA15G17205	K7MBM5		K7MYP4	100801682 ethylene-responsive transcription factor 1B-like
GLYMA05G05221	K7KN77	gmx01230 Biosynthesis of amino acids (3)	I1K9R1	100780483 argininosuccinate lyase, chloroplastic-like
GLYMA16G08001	K7MFQ0		I1LKB8	100787387 arogenate dehydratase/prephenate dehydratase 2, chloroplastic-like
GLYMA19G28574	K7MXS9		I1N0Y1	100815533 imidazole glycerol phosphate synthase hisHF, chloroplastic-like
GLYMA02G04080	C6T2Z9	gmx00240 Pyrimidine metabolism (2)	C6T2Z9	100775415 DNA-directed RNA polymerase subunit 10-like protein
GLYMA06G40441	K7KXE6		I1MD11	100790833 5'-nucleotidase SurE-like
GLYMA08G36390	K7L964	gmx00270 Cysteine and methionine metabolism (2)	I1JRF8	100778473 glutathione synthetase, chloroplastic-like
GLYMA10G37651	K7LL07		K7L1E9	100785514 1-aminocyclopropane-1-carboxylate oxidase 1-like
GLYMA05G25800	I1K310	gmx04626 Plant-pathogen interaction (2)	I1N0L8	100784890 disease resistance protein RPM1-like
GLYMA06G39831	K7KXB7		I1KYA7	100802130 disease resistance protein RPM1-like
GLYMA10G28710	I1LB34	gmx00230 Purine metabolism (2)	C6T2Z9	100775415 DNA-directed RNA polymerase subunit 10-like protein
GLYMA13G33901	K7M231		I1MD11	100790833 5'-nucleotidase SurE-like
GLYMA16G24711	K7MH53	gmx03013 RNA transport (2)	I1JDM8	100778073 eukaryotic translation initiation factor 5-like
GLYMA08G23846	K7L851		K7LSJ2	100813443 protein EXPORTIN 1A
GLYMA08G24646	K7L894	gmx04141 Protein processing in endoplasmic reticulum (2)	I1M0B1	100782827 E3 ubiquitin-protein ligase RMA1H1-like
GLYMA14G37460	K7M818		I1MGM3	100820432 chaperone protein dnaJ 49-like
GLYMA07G17123	K7L1N0	gmx00051 Fructose and mannose metabolism (1)	I1KZW7	100797925 pyrophosphate--fructose 6-phosphate 1-phosphotransferase subunit beta
GLYMA13G31895	K7M1P5	gmx03020 RNA polymerase (1)	C6T2Z9	100775415 DNA-directed RNA polymerase subunit 10-like protein
GLYMA14G38985	K7M8B4	gmx00710 Carbon fixation in photosynthetic organisms (1)	I1JMI9	100799344 NAD-dependent malic enzyme 62 kDa isoform, mitochondrial
GLYMA16G00270	K7MEB4	gmx00480 Glutathione metabolism (1)	I1JRF8	100778473 glutathione synthetase, chloroplastic-like
GLYMA06G23043	K7KWA9	gmx02010 ABC transporters (1)	K7KJS5	100814859 ABC transporter C family member 2-like
GLYMA12G04835	K7LSZ9	gmx04712 Circadian rhythm - plant (1)	K7KI62	100793561 ELF3; protein EARLY FLOWERING 3-like
GLYMA20G04340	K7N155	gmx00340 Histidine metabolism (1)	I1N0Y1	100815533 imidazole glycerol phosphate synthase hisHF, chloroplastic-like
GLYMA05G38370	K7KS68	gmx00590 Arachidonic acid metabolism (1)	I1KJ50	100775694 prostaglandin E synthase 2
GLYMA14G06020	K7M535	gmx03018 RNA degradation (1)	I1N032	100788432 ATP-dependent RNA helicase SKI2
GLYMA17G13170	K7MLB5	gmx03040 Spliceosome (1)	K7LMH4	100812519 U4/U6 small nuclear ribonucleoprotein Prp3-like
GLYMA07G07760	I1KIB3	gmx00730 Thiamine metabolism (1)	K7KIL6	100787937 probable 1-deoxy-D-xylulose-5-phosphate synthase, chloroplastic
GLYMA15G17190	K7MBM4	gmx00591 Linoleic acid metabolism (1)	I1LBB9	100802887 probable linoleate 9S-lipoxygenase 5
GLYMA18G32250	I1N1X8	gmx03450 Non-homologous end-joining (1)	I1LC95	100797038 DNA repair protein XRCC4-like
GLYMA14G39146	K7M8C7	gmx01200 Carbon metabolism (1)	I1JMI9	100799344 NAD-dependent malic enzyme 62 kDa isoform, mitochondrial
GLYMA15G39780	K7MDS5	gmx00010 Glycolysis / Gluconeogenesis (1)	I1KZW7	100797925 pyrophosphate--fructose 6-phosphate 1-phosphotransferase subunit beta
GLYMA17G23865	K7MMG0	gmx00400 Phenylalanine, tyrosine and tryptophan biosynthesis (1)	I1LKB8	100787387 arogenate dehydratase/prephenate dehydratase 2, chloroplastic-like
GLYMA18G43353	K7MTL2	gmx00220 Arginine biosynthesis (1)	I1K9R1	100780483 argininosuccinate lyase, chloroplastic-like
GLYMA07G17921	K7L1S7	gmx00904 Diterpenoid biosynthesis (1)	K7MLN5	106796737 gibberellin 2-beta-dioxygenase 8-like
GLYMA13G33901	K7M230	gmx00900 Terpenoid backbone biosynthesis (1)	K7KIL6	100787937 probable 1-deoxy-D-xylulose-5-phosphate synthase, chloroplastic
GLYMA17G23801	K7MMF2	gmx04120 Ubiquitin mediated proteolysis (1)	I1LXB5	100788845 F-box protein SKP2B
GLYMA19G07400	I1N6W5	gmx00563 Glycosylphosphatidylinositol (GPI)-anchor biosynthesis (1)	I1KDB7	100794836 putative GPI-anchor transamidase
GLYMA05G28710	K7KQF0	gmx00780 Biotin metabolism (1)	I1KFQ1	100776585 8-amino-7-oxononanoate synthase-like
GLYMA06G26134	K7KWJ4	gmx00531 Glycosaminoglycan degradation (1)	I1JEC1	100803057 heparanase-like protein 2
GLYMA07G16540	K7L1J9	gmx00500 Starch and sucrose metabolism (1)	K7KQK7	100816642 alpha,alpha-trehalose-phosphate synthase [UDP-forming] 1-like
GLYMA06G12491	K7KUL1	gmx00760 Nicotinate and nicotinamide metabolism (1)	I1MD11	100790833 5'-nucleotidase SurE-like
GLYMA15G06270	I1ME01	gmx00030 Pentose phosphate pathway (1)	I1KZW7	100797925 pyrophosphate--fructose 6-phosphate 1-phosphotransferase subunit beta
GLYMA17G23845	K7MMF7	gmx00620 Pyruvate metabolism (1)	I1JMI9	100799344 NAD-dependent malic enzyme 62 kDa isoform, mitochondrial
GLYMA07G06010	I1KHU0	gmx00250 Alanine, aspartate and glutamate metabolism (1)	I1K9R1	100780483 argininosuccinate lyase, chloroplastic-like
GLYMA18G32231	K7MSH8	gmx03008 Ribosome biogenesis in eukaryotes (1)	K7LSJ2	100813443 protein EXPORTIN 1A
GLYMA18G45453	K7MU08	gmx03010 Ribosome (1)	C6SZN4	100306503 uncharacterized LOC100306503
GLYMA10G21032	K7LIQ3	gmx04144 Endocytosis (1)	C6T441	100527366 uncharacterized LOC100527366
GLYMA14G40070	K7M8I4	gmx00100 Steroid biosynthesis (1)	I1LEK1	100780409 triacylglycerol lipase 1-like
GLYMA02G12710	K7K7S0	gmx03060 Protein export (1)	I1NIQ4	100807037 sec-independent protein translocase protein TATA, chloroplastic-like
GLYMA15G21371	K7MCC1	gmx04146 Peroxisome (1)	K7M2R0	100789384 protein SYM1
GLYMA17G23840	K7MMF6
GLYMA13G43450	C6SZN4
GLYMA19G44295	K7N0A3
GLYMA20G26571	K7N369
GLYMA02G04660	K7K6D5
GLYMA11G35880	I1LMX3
GLYMA12G15710	K7LUI1
GLYMA17G23855	K7MMF8
GLYMA06G30490	K7KWN4
GLYMA01G32103	K7K3K0
GLYMA15G38501	K7MDJ4
GLYMA04G10771	K7KJ87
GLYMA06G03870	I1K7V6
GLYMA10G09557	K7LI06
GLYMA12G20977	K7LUW5
GLYMA15G41860	K7ME22
GLYMA01G43746	K7K5C4
GLYMA02G35841	K7K9M7
GLYMA13G08940	I1LX98
GLYMA04G39370	I1JY52
GLYMA10G43720	I1LFD5
GLYMA15G39454	K7MDP0
GLYMA02G34171	K7K9F2
GLYMA06G01102	K7KSE2
GLYMA11G29440	I1LLR9
GLYMA08G38510	I1KX98
GLYMA19G07186	K7MWP8
GLYMA05G08356	K7KNK0
GLYMA19G24415	K7MX98
GLYMA03G03620	K7KCJ3
GLYMA07G30650	C6SWL5
GLYMA10G43720	K7LM28
GLYMA19G17855	K7MX15
GLYMA13G00211	K7LWR0
GLYMA17G21945	K7MMB6
GLYMA18G07661	K7MQD0
GLYMA15G38125	K7MDI1
GLYMA13G04320	K7LXB0
GLYMA01G07130	I1J601
GLYMA02G03280	C6TFW0
GLYMA05G18376	K7KP68
GLYMA12G24981	K7LV45
GLYMA19G38385	K7MZA5
GLYMA03G40811	K7KGW0
GLYMA18G40340	K7MT74
GLYMA18G50525	K7MV01
GLYMA04G09450	K7KJ07
GLYMA15G37820	K7MDG2
GLYMA07G38441	K7L3T7
GLYMA08G41720	I1KXX3
GLYMA17G23811	K7MMF3
GLYMA01G40985	K7K4V3
GLYMA07G10831	K7L0P4
GLYMA17G18121	K7MM11
GLYMA05G18326	K7KP65
GLYMA05G23032	K7KPJ3
GLYMA16G21891	K7MGQ3
GLYMA03G21720	K7KDU8
GLYMA15G12130	I1MFN3
GLYMA15G39765	K7MDS4
GLYMA13G22325	K7M011
GLYMA13G22595	K7M022
GLYMA17G15876	K7MLQ7
GLYMA04G42880	K7KM71
GLYMA15G39721	K7MDS0
GLYMA13G37270	K7M2P0
GLYMA05G16213	K7KP34
GLYMA06G08937	K7KTX2
GLYMA08G45105	K7LAH4
GLYMA10G12040	K7LIA0
GLYMA16G25032	K7MH73
GLYMA18G29451	K7MSE7
GLYMA19G34683	K7MYP3
GLYMA12G31643	K7LVU6
GLYMA07G36851	K7L3J9
GLYMA14G38220	I1MBJ2
GLYMA17G23830	I1MW55
GLYMA20G36760	I1NIQ4
GLYMA02G39410	K7KA79
GLYMA06G41591	K7KXM1
GLYMA14G17011	K7M6J0
GLYMA03G21956	K7KDV3
GLYMA12G06606	K7LTB3
GLYMA03G34821	K7KFY0
GLYMA03G05661	K7KCU4
GLYMA04G37970	I1JXS3
GLYMA04G10151	K7KJ53
GLYMA07G09700	I1KIS7
GLYMA20G36760	K7N519
GLYMA17G34921	K7MNI3
GLYMA08G46596	K7LAQ3
GLYMA18G38400	I1N2D1
GLYMA01G04700	K7K1P4
GLYMA19G36900	K7MZ32
GLYMA02G38611	K7KA40
GLYMA12G01970	I1LP68
GLYMA16G07071	K7MFI9
GLYMA13G01980	I1LW01
GLYMA15G10100	K7MAI5
GLYMA20G38293	K7N5C0
GLYMA16G23740	K7MH05
GLYMA04G34912	K7KKU1
GLYMA08G16010	I1KTJ2
GLYMA07G24292	K7L271
GLYMA19G00320	K7MVP3
GLYMA08G04276	K7L4T6
GLYMA07G34280	I1KM54
GLYMA05G03395	K7KMX0
GLYMA16G32080	B3SN57
GLYMA19G01330	I1N5T7
GLYMA01G45710	I1JB18
GLYMA08G02970	K7L4L6
GLYMA11G08601	K7LNL6
GLYMA03G05661	K7KCU2
GLYMA07G12610	K7L110
GLYMA10G36870	C6SZZ6
GLYMA20G12165	K7N1R2
GLYMA04G37970	I1JXS2
GLYMA11G38110	I1LNK6
GLYMA16G06091	K7MFD1
GLYMA04G08040	K7KIR5
GLYMA04G08040	K7KIR3
GLYMA04G08040	K7KIR4
GLYMA03G03685	K7KCJ4
GLYMA02G42760	K7KAT9
GLYMA12G01490	K7LSE4
GLYMA01G35671	K7K414
GLYMA13G05561	K7LXI5
GLYMA18G29605	K7MSF8
GLYMA13G35451	K7M2D2
GLYMA13G38621	K7M2X5
GLYMA16G19464	K7MGI8
GLYMA10G41970	K7LLR8
GLYMA20G26680	K7N376
GLYMA07G12610	K7L108
GLYMA02G40863	K7KAH2
GLYMA07G00480	I1KG41
GLYMA10G20994	K7LIQ2
GLYMA08G46596	K7LAQ2
GLYMA15G37240	I1MIN6
GLYMA02G42760	I1JIB3
GLYMA15G01110	K7M8T1
GLYMA03G27721	K7KEL4
GLYMA03G30620	K7KF57
GLYMA01G06426	K7K1Y5
GLYMA10G17020	K7LIJ8
GLYMA04G08040	K7KIR2
GLYMA18G46790	K7MUB1
GLYMA05G34890	I1K5P0
GLYMA15G21381	K7MCC2
GLYMA19G39330	K7MZF6
GLYMA02G41957	K7KAP1
GLYMA17G17760	I1MVN8
GLYMA03G25850	K7KEC8
GLYMA13G16610	I1LY18
GLYMA14G39201	K7M8D0
GLYMA17G10030	K7MKS0
GLYMA14G10730	I1M912
GLYMA14G39201	K7M8C9
GLYMA18G12573	K7MR52
GLYMA13G31320	I1M245
GLYMA03G29654	K7KEZ1
GLYMA03G27721	K7KEL3
GLYMA05G03130	K7KMW0
GLYMA10G43730	I1LFD6
GLYMA13G06980	I1LWX9
GLYMA16G34140	I1MQJ7
GLYMA01G35010	K7K3X3
GLYMA13G43860	K7M3W8
GLYMA06G11181	K7KUD8
GLYMA05G26506	K7KQ14
GLYMA06G14241	K7KUX0
GLYMA07G32420	C6T441
GLYMA18G32201	K7MSH5
GLYMA04G21413	K7KK30
GLYMA12G11573	K7LU35
GLYMA17G14191	K7MLG4
GLYMA08G12921	K7L678
GLYMA01G36790	I1J8H9
GLYMA04G03661	K7KHW2
GLYMA17G08391	K7MKF3
GLYMA06G03330	I1K7Q4
GLYMA08G45190	K7LAI2
GLYMA20G32410	I1NHI6
GLYMA07G12610	K7L107
GLYMA17G140	K7MLF9
GLYMA12G12810	I1LS34
GLYMA02G38601	K7KA39
GLYMA08G25990	K7L8H6
GLYMA14G09760	I1M8T1
GLYMA01G36790	K7K469
GLYMA03G06506	K7KCY6
GLYMA02G39365	K7KA74
GLYMA08G24020	I1KVU2
GLYMA10G01330	I1L7M3
GLYMA11G10091	K7LNU0
GLYMA16G07081	K7MFJ0
GLYMA17G37491	K7MP03
GLYMA13G24840	I1M0B1
GLYMA02G47410	K7KBQ1
GLYMA11G29878	K7LR21
GLYMA11G34961	K7LRP9
GLYMA05G34960	I1K5P8
GLYMA15G37190	K7MDC2
GLYMA02G02260	I1JBM4
GLYMA06G46180	I1KFD0
GLYMA13G25900	K7M0K1
GLYMA13G33901	K7M229
GLYMA04G10030	I1JV61
GLYMA05G31300	I1K4K0
GLYMA10G40080	I1LEB5
GLYMA17G17760	K7MM01
GLYMA01G35681	K7K415
GLYMA11G01340	I1LG09
GLYMA08G27670	I1KWI7
GLYMA14G36454	K7M7W9
GLYMA17G11631	K7ML09
GLYMA05G06680	K7KND4
GLYMA05G29230	I1K409
GLYMA20G11067	K7N1M4
GLYMA13G05561	K7LXI4
GLYMA15G12770	K7MAX5
GLYMA16G07845	K7MFP2
GLYMA19G34696	K7MYP4
GLYMA04G00785	K7KHF7
GLYMA08G44681	K7LAE1
GLYMA10G32840	I1LC95
GLYMA08G05240	I1KQD7
GLYMA10G43957	K7LM40
GLYMA18G08160	I1N072
GLYMA01G00660	I1J4C6
GLYMA04G39975	K7KLN3
GLYMA05G05265	K7KN78
GLYMA19G05941	K7MWI7
GLYMA06G01421	K7KSG5
GLYMA01G22140	K7K2R3
GLYMA08G47751	K7LAW7
GLYMA17G33450	I1MX08
GLYMA03G01210	K7KC27
GLYMA03G14935	K7KDI5
GLYMA04G39420	I1JY59
GLYMA06G06200	I1K8J5
GLYMA04G06450	K7KIE4
GLYMA13G02570	I1LW38
GLYMA13G07750	I1LX36
GLYMA13G41031	K7M3D9
GLYMA16G27200	I1MNX3
GLYMA08G43466	K7LA86
GLYMA10G30130	K7LJQ5
GLYMA17G36210	K7MNQ7
GLYMA05G18393	K7KP69
GLYMA10G37870	I1LDQ4
GLYMA06G01210	I1K744
GLYMA06G01210	K7KSF4
GLYMA11G30430	K7LR36
GLYMA13G37680	I1M3W7
GLYMA19G25710	I1N7R3
GLYMA03G40891	K7KGX7
GLYMA11G01340	I1LG08
GLYMA06G17930	K7KVJ9
GLYMA14G04980	K7M4X1
GLYMA13G42490	I1M5B1
GLYMA15G03453	K7M992
GLYMA13G31320	I1M244
GLYMA15G18871	K7MC02
GLYMA02G02260	K7K5Z0
GLYMA07G12610	K7L105
GLYMA11G37881	K7LS40
GLYMA17G17700	K7MLZ5
GLYMA04G05280	K7KI66
GLYMA11G16000	I1LKE6
GLYMA15G42880	I1MJN1
GLYMA04G05200	K7KI54
GLYMA13G15560	I1LXY5
GLYMA02G02260	K7K5Y9
GLYMA06G08580	K7KTT8
GLYMA03G39870	I1JRD8
GLYMA08G01300	I1KP47
GLYMA10G30130	I1LBH8
GLYMA06G01210	K7KSF3
GLYMA19G35491	K7MYT9
GLYMA06G01210	K7KSF2
GLYMA07G29150	I1KL13
GLYMA16G01530	I1MK61
GLYMA16G03375	K7MEY7
GLYMA03G39870	I1JRD7
GLYMA16G21370	I1MMS7
GLYMA06G46860	K7KYF2
GLYMA19G03420	K7MW67
GLYMA01G39590	I1J997
GLYMA06G46161	K7KYB0
GLYMA07G12610	I1KJD0
GLYMA07G15480	K7L1E9
GLYMA01G35370	K7K3Z3
GLYMA11G11610	I1LJ32
GLYMA06G01210	K7KSF1
GLYMA06G03410	I1K7Q8
GLYMA13G01930	I1LVZ7
GLYMA06G01210	K7KSF0
GLYMA10G31331	K7LJX3
GLYMA07G11520	I1KJ50
GLYMA16G01150	K7MEH9
GLYMA05G34960	I1K5Q0
GLYMA01G42360	I1JA15
GLYMA19G44280	I1NCI6
GLYMA15G02970	I1MD12
GLYMA12G36150	I1LV92
GLYMA17G06450	C6TKE5
GLYMA07G34920	I1KMA4
GLYMA11G15750	K7LPV2
GLYMA10G36620	K7LKU9
GLYMA13G37543	K7M2R0
GLYMA20G33820	I1NHV7
GLYMA04G43040	K7KM79
GLYMA10G30130	I1LBH7
GLYMA11G06790	I1LHM3
GLYMA20G03840	I1NDL8
GLYMA20G35841	K7N4X2
GLYMA02G48020	I1JJV4
GLYMA05G02210	I1K008
GLYMA08G07650	I1KR22
GLYMA10G37050	K7LKX2
GLYMA15G17430	I1MGY6
GLYMA03G10090	K7KDB3
GLYMA08G07850	K7L5F1
GLYMA11G11610	I1LJ31
GLYMA10G29010	I1LB66
GLYMA12G12710	K7LU80
GLYMA13G42520	K7M3M8
GLYMA03G05300	I1JL37
GLYMA06G10470	I1K9U4
GLYMA19G02061	K7MVZ9
GLYMA01G35145	K7K3Y3
GLYMA03G29920	K7KF18
GLYMA17G15430	I1MV50
GLYMA20G27731	K7N3E0
GLYMA16G33320	I1MQC2
GLYMA05G34960	I1K5Q3
GLYMA08G01210	I1KP38
GLYMA18G02820	I1MZ01
GLYMA19G32290	I1N922
GLYMA02G17181	K7K8I7
GLYMA03G30231	K7KF32
GLYMA10G11130	K7LI62
GLYMA05G34960	I1K5Q1
GLYMA16G31930	K7MII0
GLYMA17G15430	K7MLN5
GLYMA06G24870	K7KWH9
GLYMA10G29110	K7LJI2
GLYMA11G02420	I1LGD9
GLYMA01G35470	I1J853
GLYMA11G15750	I1LKC0
GLYMA13G38830	I1M486
GLYMA08G06220	K7L556
GLYMA05G04070	K7KN07
GLYMA13G42280	K7M3L3
GLYMA15G15930	I1MGM3
GLYMA06G18390	I1KC88
GLYMA08G43880	I1KYH5
GLYMA18G35320	I1N256
GLYMA20G35420	I1NIB5
GLYMA05G01090	I1JZP9
GLYMA13G37680	I1M3W6
GLYMA15G12985	K7MB00
GLYMA05G18342	K7KP66
GLYMA13G37140	I1M3R5
GLYMA19G28840	K7MXT8
GLYMA05G34960	I1K5P9
GLYMA16G33903	K7MIW9
GLYMA03G33190	K7KFP9
GLYMA05G34960	I1K5Q2
GLYMA18G18130	K7MRV6
GLYMA19G34210	I1N9K5
GLYMA20G34790	I1NI56
GLYMA03G04410	I1JKY2
GLYMA05G34960	I1K5P7
GLYMA10G37870	C6T8T0
GLYMA15G02970	I1MD11
GLYMA15G15930	I1MGM2
GLYMA16G26020	C6TG75
GLYMA16G34680	K7MJ34
GLYMA05G01090	I1JZP8
GLYMA08G43880	I1KYH6
GLYMA14G07150	I1M829
GLYMA13G09290	I1LXB5
GLYMA01G35330	I1J841
GLYMA10G29270	I1LBA4
GLYMA11G35362	K7LRR3
GLYMA18G32211	K7MSH6
GLYMA07G30270	K7L2I5
GLYMA08G12956	K7L680
GLYMA12G35720	I1LV51
GLYMA18G48070	K7MUI7
GLYMA02G04290	I1JC60
GLYMA06G22545	K7KW87
GLYMA15G09270	K7MAD5
GLYMA12G24235	K7LV34
GLYMA15G42380	I1MJJ6
GLYMA01G43640	I1JAF5
GLYMA05G01210	I1JZQ8
GLYMA11G15750	I1LKB8
GLYMA19G32290	I1N921
GLYMA05G08300	I1K1E0
GLYMA19G39790	I1NB53
GLYMA10G36260	I1LD96
GLYMA03G00780	K7KBY8
GLYMA08G41995	K7L9Y7
GLYMA10G40910	I1LEK1
GLYMA14G35580	I1MAX2
GLYMA06G46110	I1KFC4
GLYMA16G00615	K7MED8
GLYMA01G35480	I1J855
GLYMA05G01210	K7KMJ8
GLYMA11G14011	K7LPJ2
GLYMA03G39020	I1JR47
GLYMA14G08260	I1M8E6
GLYMA18G16060	I1N176
GLYMA06G24870	I1KDB7
GLYMA16G17542	K7MGC9
GLYMA13G38830	I1M485
GLYMA02G12740	K7K7S1
GLYMA18G16060	K7MRL6
GLYMA07G12070	I1KJ97
GLYMA07G18606	K7L1W7
GLYMA14G11050	I1M941
GLYMA03G25670	K7KEB6
GLYMA10G10110	I1L9K7
GLYMA13G19540	K7LZI6
GLYMA06G19770	I1KCK1
GLYMA16G03700	K7MF04
GLYMA07G06898	K7KZZ4
GLYMA19G42710	K7N003
GLYMA14G22840	I1MA14
GLYMA02G14050	K7K7Z7
GLYMA14G10180	I1M8W6
GLYMA11G07900	I1LHY9
GLYMA01G42650	I1JA49
GLYMA20G24180	I1NF97
GLYMA01G04241	K7K1L2
GLYMA16G09320	I1MM55
GLYMA20G25700	I1NFQ8
GLYMA18G51960	I1N4Z4
GLYMA20G35790	K7N4W6
GLYMA18G42230	I1N2T3
GLYMA20G31710	K7N447
GLYMA02G10020	I1JDM8
GLYMA02G03640	I1JC00
GLYMA06G03660	K7KSV5
GLYMA12G10731	K7LTZ9
GLYMA11G36510	I1LN19
GLYMA01G35480	I1J854
GLYMA02G16650	K7K8E6
GLYMA16G06750	K7MFH4
GLYMA01G35480	K7K3Z6
GLYMA18G03053	K7MPJ1
GLYMA19G33720	K7MYJ7
GLYMA07G35760	K7L3E0
GLYMA15G41590	K7ME15
GLYMA13G02535	K7LX30
GLYMA05G37690	I1K6H4
GLYMA08G07850	I1KR42
GLYMA10G16741	K7LIJ7
GLYMA20G31710	I1NHC2
GLYMA01G39760	I1J9B1
GLYMA19G06815	K7MWM9
GLYMA11G35290	K7LRQ9
GLYMA14G09361	K7M5N2
GLYMA13G19540	K7LZI5
GLYMA17G20131	K7MM64
GLYMA20G31710	K7N445
GLYMA03G26760	K7KEF5
GLYMA18G03066	K7MPJ2
GLYMA01G37720	I1J8S1
GLYMA04G33410	K7KKN2
GLYMA08G22800	K7L7Y1
GLYMA13G34390	I1M2Z2
GLYMA17G36570	I1MXT3
GLYMA18G04880	K7MPV6
GLYMA16G09320	I1MM56
GLYMA18G04880	K7MPV4
GLYMA18G04880	K7MPV5
GLYMA20G25905	K7N327
GLYMA08G43880	I1KYH4
GLYMA03G33560	I1JPJ6
GLYMA06G47430	I1KFQ1
GLYMA15G37431	K7MDE2
GLYMA18G44520	I1N377
GLYMA18G10180	I1N0J7
GLYMA10G01720	I1L7Q6
GLYMA20G32621	K7N4B4
GLYMA08G43350	I1KYC5
GLYMA07G37355	K7L3M5
GLYMA19G05660	I1N6L6
GLYMA11G34970	I1LMP1
GLYMA10G02520	I1L7X1
GLYMA15G05641	K7M9P6
GLYMA20G35790	K7N4W5
GLYMA02G15770	I1JF18
GLYMA04G09630	K7KJ13
GLYMA04G38090	K7KLA7
GLYMA01G05500	I1J5P9
GLYMA10G31580	I1LBX8
GLYMA03G00830	N/A
GLYMA16G34680	K7MJ33
GLYMA19G41010	K7MZN6
GLYMA02G38380	I1JH55
GLYMA03G42090	I1JS27
GLYMA07G12180	K7L0Y5
GLYMA16G09320	N/A
GLYMA04G22020	K7KK36
GLYMA04G42470	I1JZ20
GLYMA07G35280	K7L3B6
GLYMA07G18110	I1KKD9
GLYMA15G10280	I1MF49
GLYMA01G00530	K7K118
GLYMA02G17293	K7K8J2
GLYMA01G32031	K7K3J8
GLYMA06G10130	I1K9R1
GLYMA16G29600	K7MI02
GLYMA02G12740	I1JEC1
GLYMA02G09130	K7K733
GLYMA08G09421	K7L5M6
GLYMA12G00820	I1LNT1
GLYMA03G00725	K7KBY0
GLYMA07G38850	N/A
GLYMA13G23010	I1LZR9
GLYMA08G11570	K7L616
GLYMA18G48431	K7MUL4
GLYMA11G37680	K7LS28
GLYMA07G10641	K7L0N1
GLYMA12G29520	I1LTI1
GLYMA17G18341	K7MM23
GLYMA02G39370	K7KA76
GLYMA03G33590	I1JPJ9
GLYMA12G33711	K7LW58
GLYMA05G05230	I1K0U6
GLYMA02G46430	I1JJE0
GLYMA07G04430	I1KHC2
GLYMA17G35241	K7MNK3
GLYMA03G40050	I1JRF8
GLYMA11G14480	I1LJY8
GLYMA12G04050	I1LPW5
GLYMA08G41544	K7L9W0
GLYMA08G13011	K7L685
GLYMA04G35130	I1JX51
GLYMA01G38830	I1J921
GLYMA03G25670	I1JMN3
GLYMA06G03583	K7KSV1
GLYMA08G25070	I1KW28
GLYMA16G28540	K7MHT5
GLYMA09G01050	I1KZW7
GLYMA07G00240	I1KG15
GLYMA06G41500	I1KEE1
GLYMA14G04860	I1M7C9
GLYMA03G04361	K7KCN4
GLYMA17G34811	K7MNH9
GLYMA08G13260	K7L699
GLYMA10G38640	I1LDX6
GLYMA18G18095	K7MRV4
GLYMA07G08351	K7L0A0
GLYMA19G33460	I1N9D6
GLYMA16G08261	K7MFS4
GLYMA18G06610	I1MZW2
GLYMA18G12920	I1N0Y1
GLYMA08G37060	I1KX39
GLYMA17G14693	K7MLJ3
GLYMA13G40276	K7M380
GLYMA08G15360	I1KTD6
GLYMA06G07790	K7KTM3
GLYMA10G23711	K7LIW7
GLYMA14G10130	K7M5S1
GLYMA13G10040	I1LXG0
GLYMA13G18010	I1LYG2
GLYMA13G28910	I1M1F3
GLYMA02G38380	K7KA23
GLYMA13G24520	I1M079
GLYMA16G09351	K7MFX4
GLYMA10G29490	I1LBC0
GLYMA02G13470	K7K7W9
GLYMA08G46650	I1KZ75
GLYMA16G05580	I1MLD0
GLYMA03G24630	I1JMI9
GLYMA04G15306	K7KJS5
GLYMA01G36920	I1J8J5
GLYMA14G36100	I1MB08
GLYMA10G39720	K7LLC3
GLYMA19G34290	I1N9L2
GLYMA14G03860	I1M741
GLYMA02G08091	K7K6X5
GLYMA02G13470	K7K7W8
GLYMA13G43710	K7M3V8
GLYMA12G05530	I1LQD2
GLYMA11G00560	I1LFR3
GLYMA02G38270	I1JH43
GLYMA18G16376	K7MRP3
GLYMA17G36800	I1MXV3
GLYMA19G34290	I1N9L1
GLYMA13G32010	K7M1Q2
GLYMA13G10410	K7LY84
GLYMA14G06550	I1M7U9
GLYMA02G14331	K7K813
GLYMA03G31440	I1JNY3
GLYMA10G39940	K7LLD7
GLYMA13G10410	K7LY81
GLYMA20G35790	K7N4W4
GLYMA09G00490	K7LB32
GLYMA13G33210	I1M2P3
GLYMA16G05580	I1MLC9
GLYMA16G27532	K7MHM4
GLYMA16G33010	I1MQ94
GLYMA07G17490	I1KKA5
GLYMA19G02400	I1N630
GLYMA16G17470	I1MMJ3
GLYMA08G46650	K7LAQ7
GLYMA20G24891	K7N2W0
GLYMA11G07020	I1LHP6
GLYMA13G09794	C6FF75
GLYMA04G04435	K7KI10
GLYMA04G00630	I1JSF1
GLYMA02G47210	I1JJL6
GLYMA01G06671	K7K202
GLYMA17G12970	I1MUF4
GLYMA02G12640	I1JEA8
GLYMA19G34870	I1N9R8
GLYMA04G05280	K7KI62
GLYMA04G07400	K7KIL6
GLYMA04G00630	K7KHF0
GLYMA18G53186	K7MVG5
GLYMA04G03540	K7KHV7
GLYMA04G07400	K7KIL5
GLYMA10G30850	I1LBP9
GLYMA18G12521	K7MR48
GLYMA04G27662	K7KKA5
GLYMA17G05042	K7MJY5
GLYMA13G07230	K7LXR3
GLYMA10G33300	I1LCE1
GLYMA18G44180	K7MTR3
GLYMA09G00490	K7LB30
GLYMA16G26311	K7MHF0
GLYMA16G29111	K7MHW7
GLYMA02G39370	K7KA75
GLYMA03G02120	K7KCA2
GLYMA16G34430	I1MQM3
GLYMA11G20240	K7LQD5
GLYMA13G05441	K7LXH7
GLYMA10G39720	K7LLC2
GLYMA15G37170	I1MIN1
GLYMA16G28520	K7MHT3
GLYMA14G05270	I1M7H0
GLYMA05G06351	K7KNC6
GLYMA04G17450	K7KJZ0
GLYMA12G30330	K7LVM6
GLYMA04G25590	I1JWE9
GLYMA01G00490	K7K113
GLYMA01G44950	I1JAU5
GLYMA14G04750	I1M7B8
GLYMA05G17460	I1K223
GLYMA18G51546	K7MV70
GLYMA07G36270	K7L3G9
GLYMA12G17690	K7LUS0
GLYMA05G21440	K7KPB4
GLYMA11G04740	K7LN11
GLYMA16G23541	K7MGZ4
GLYMA06G40900	I1KEA9
GLYMA18G50840	K7MV17
GLYMA06G40670	I1KE90
GLYMA14G05280	K7M4Z4
GLYMA02G13470	I1JEJ2
GLYMA12G30330	K7LVM5
GLYMA17G18180	K7MM13
GLYMA15G09120	I1MEU4
GLYMA08G46650	K7LAQ6
GLYMA12G08770	K7LTQ2
GLYMA06G47620	K7KYK4
GLYMA01G20811	K7K2M8
GLYMA14G05280	K7M4Z2
GLYMA18G51950	I1N4Z3
GLYMA10G29490	I1LBB9
GLYMA14G34810	K7M7L6
GLYMA18G50540	I1N4N1
GLYMA14G34810	I1MAT5
GLYMA18G50510	I1N4M9
GLYMA01G42960	K7K581
GLYMA05G01481	K7KML8
GLYMA05G01481	K7KML7
GLYMA03G28281	K7KEN9
GLYMA07G13304	K7L142
GLYMA19G34870	K7MYQ0
GLYMA11G01460	K7LMH4
GLYMA18G50670	I1N4N7
GLYMA18G50650	I1N4N5
GLYMA13G42941	K7M3P9
GLYMA14G05280	I1M7H1
GLYMA18G33170	K7MSK5
GLYMA16G30390	K7MI65
GLYMA12G32460	I1LUA2
GLYMA01G03964	K7K1J0
GLYMA13G26240	K7M0M8
GLYMA06G05890	I1K8G7
GLYMA08G43170	I1KYA7
GLYMA13G26240	K7M0M6
GLYMA18G10550	I1N0L8
GLYMA18G10550	K7MQT7
GLYMA13G26240	K7M0M5
GLYMA14G05040	I1M7E6
GLYMA05G29651	K7KQK7
GLYMA11G31367	K7LR62
GLYMA16G25140	I1MND6
GLYMA13G22906	K7M040
GLYMA20G20456	K7N297
GLYMA19G23720	I1N7J0
GLYMA03G07121	K7KD09
GLYMA18G14810	K7MRG2
GLYMA08G18570	I1KU75
GLYMA16G23800	K7MH09
GLYMA18G14810	K7MRG1
GLYMA14G06570	I1M7V3
GLYMA12G36510	K7LWL7
GLYMA02G33920	I1JGC3
GLYMA12G36510	K7LWL6
GLYMA16G25140	I1MND5
GLYMA17G07520	I1MSV7
GLYMA16G28460	K7MHT0
GLYMA16G28770	K7MHV0
GLYMA03G04610	K7KCQ2
GLYMA01G05710	K7K1U0
GLYMA13G43960	I1M5Q8
GLYMA16G06421	K7MFE9
GLYMA12G36241	K7LWJ5
GLYMA12G36241	K7LWJ4
GLYMA01G39830	K7K4N6
GLYMA16G28510	K7MHT2
GLYMA06G43641	K7KXX0
GLYMA20G36010	K7N4Y2
GLYMA07G17370	K7L1P3
GLYMA12G15825	K7LUI6
GLYMA12G02090	K7LSJ2
GLYMA12G15850	K7LUI7
GLYMA15G00340	I1MC84
GLYMA16G29541	K7MHZ8
GLYMA06G40780	I1KE99
GLYMA16G23541	K7MGZ3
GLYMA07G17370	K7L1P2
GLYMA01G31711	K7K3I0
GLYMA03G05290	I1JL36
GLYMA18G50840	I1N4Q2
GLYMA13G17270	I1LY86
GLYMA18G50840	K7MV16
GLYMA11G37300	I1LNA9
GLYMA18G50840	K7MV15
GLYMA13G25750	I1M0J3
GLYMA13G25950	K7M0K5
GLYMA13G25750	K7M0J0
GLYMA18G50840	K7MV14
GLYMA13G14263	K7LYS5
GLYMA03G05671	K7KCU5
GLYMA20G36010	K7N4Y1
GLYMA14G35890	K7M7S3
GLYMA03G05351	K7KCT4
GLYMA03G04530	I1JKY8
GLYMA13G33536	K7M209
GLYMA18G51533	K7MV68
GLYMA16G29315	K7MHY5
GLYMA18G51741	K7MV82
GLYMA20G33720	I1NHV0
GLYMA14G38561	K7M890
GLYMA05G32290	I1K4W8
GLYMA05G32290	K7KR51
GLYMA13G44470	I1M5W8
GLYMA18G07510	I1N032
GLYMA08G13040	I1KSM1
GLYMA10G42560	I1LF15
GLYMA10G34061	K7LKE9
GLYMA15G37310	K7MDD5
GLYMA16G33616	K7MIT9
GLYMA16G33590	I1MQE7
GLYMA16G23790	K7MH08
GLYMA16G33616	K7MIT8
GLYMA18G46120	K7MU55
GLYMA13G28300	K7M0Y7
GLYMA10G33851	K7LKD4
GLYMA12G36841	K7LWN5
GLYMA10G33851	K7LKD2
GLYMA07G03250	K7KZC4
GLYMA13G30860	I1M1Z5
GLYMA03G05095	K7KCR6
GLYMA03G39720	I1JRC1
GLYMA12G08230	K7LTL6
GLYMA02G29380	K7K937
GLYMA02G29380	K7K936
GLYMA19G02555	K7MW25
GLYMA07G08445	K7L0A3

## Sheet: G. max_Non-syn_InDels_KEGG
Gene ID	Uniprot ID	KEGG pathway (No of genes with Non-Synonymous InDels)	Uniprot ID	Gene
GLYMA10G00230	K7LGN5	gmx01100 Metabolic pathways (40)	C6SWI3	100305752 uncharacterized LOC100305752
GLYMA10G00291	K7LGN6		C6SWU0	100499801 uncharacterized LOC100499801
GLYMA10G00560	I1L7E2		I1K5P1	100499845 argininosuccinate synthase, chloroplastic
GLYMA10G00600	I1L7E5		C6T284	100500602 uncharacterized LOC100500602
GLYMA10G00620	K7LGQ1		K7MD49	100776781 probable pectinesterase/pectinesterase inhibitor 47
GLYMA10G00650	K7LGQ3		I1MSN7	100777532 spermidine hydroxycinnamoyl transferase-like
GLYMA10G00660	I1L7F1		I1K0H0	100778002 UDP-glucuronate 4-epimerase 5-like
GLYMA10G00710	K7LGQ6		C6TEY0	100781076 shikimate kinase, chloroplastic-like
GLYMA10G00870	C6TLB4		K7M700	100782844 NAD kinase 2, chloroplastic-like
GLYMA10G01091	K7LGR7		I1LD65	100786455 dihydrolipoyllysine-residue acetyltransferase component 5 of pyruvate dehydrogenase complex, chloroplastic-like
GLYMA10G01571	K7LGU1		I1LN28	100786653 UDP-glucuronate 4-epimerase 6-like
GLYMA10G01590	I1L7P6		I1LNT8	100787575 uncharacterized LOC100787575
GLYMA10G01595	K7LGU5		I1NCX8	100788655 endoglucanase 12-like
GLYMA10G01620	K7LGU6		I1KGD7	100789235 phospholipase D alpha 4-like
GLYMA10G01720	I1L7Q6		I1LG74	100792137 UDP-glucose 4-epimerase GEPI48-like
GLYMA10G01820	I1L7R5		I1MNV8	100792965 alpha-(1,4)-fucosyltransferase-like
GLYMA10G02340	I1L7V6		C6T9Z5	100794313 formate dehydrogenase 1, mitochondrial-like
GLYMA10G03140	K7LH16		I1LU53	100794803 aconitate hydratase, cytoplasmic
GLYMA10G03300	K7LH24		I1L3F9	100795422 peroxidase 66-like
GLYMA10G03320	I1L850		I1LZM1	100796220 acidic mammalian chitinase-like
GLYMA10G04210	I1L8D5		I1KNG5	100797313 peroxidase 29-like
GLYMA10G04320	I1L8E5		I1LQG7	100797626 linoleate 13S-lipoxygenase 2-1, chloroplastic-like
GLYMA10G04396	K7LHA5		I1LPT5	100798168 probable CDP-diacylglycerol--inositol 3-phosphatidyltransferase 2
GLYMA10G05080	K7LHF0		C6TK33	100798459 triosephosphate isomerase, chloroplastic-like
GLYMA10G05210	I1L8M4		K7MEA2	100798570 protein PHYLLO, chloroplastic
GLYMA10G05280	K7LHG0		K7KH90	100800065 linoleate 13S-lipoxygenase 3-1, chloroplastic-like
GLYMA10G05290	K7LHG1		I1N8A2	100800077 beta-glucosidase BoGH3B-like
GLYMA10G05761	K7LHJ4		I1M3R0	100800830 probable aminotransferase TAT2
GLYMA10G05880	I1L8U2		I1KAH8	100801203 probable indole-3-pyruvate monooxygenase YUCCA11
GLYMA10G05920	I1L8V0		C6TK31	100801463 UDP-N-acetylglucosamine--dolichyl-phosphate N-acetylglucosaminephosphotransferase-like
GLYMA10G06050	I1L8V9		K7LVZ2	100806124 probable terpene synthase 11
GLYMA10G06650	I1L909		I1NJ83	100806314 protoheme IX farnesyltransferase, mitochondrial-like
GLYMA10G06690	I1L912		K7MBQ9	100807970 putative glucose-6-phosphate 1-epimerase
GLYMA10G06740	C6TK33		I1KJ12	100808490 chlorophyllase-1-like
GLYMA10G06751	K7LHP1		K7KCA7	100815908 lysophospholipid acyltransferase LPEAT2-like
GLYMA10G06760	K7LHP2		K7M080	100816487 peroxidase 25-like
GLYMA10G07146	K7LHQ8		K7KVP6	100820582 tryptophan aminotransferase-related protein 2-like
GLYMA10G07560	I1L972		K7LEH7	102668851 aldose 1-epimerase-like
GLYMA10G07831	K7LHT8		Q9SEH8	547540 MAN1; mannosyl-oligosaccharide 1,2-alpha-mannosidase
GLYMA10G07840	K7LHT9		Q9SPJ5	548087 dihydroflavonol-4-reductase DFR1
GLYMA10G07935	K7LHU4	gmx01110 Biosynthesis of secondary metabolites (23)	I1K5P1	100499845 argininosuccinate synthase, chloroplastic
GLYMA10G08150	K7LHW0		I1MSN7	100777532 spermidine hydroxycinnamoyl transferase-like
GLYMA10G27960	I1LAU7		C6TEY0	100781076 shikimate kinase, chloroplastic-like
GLYMA10G27990	I1LAV9		I1LD65	100786455 dihydrolipoyllysine-residue acetyltransferase component 5 of pyruvate dehydrogenase complex, chloroplastic-like
GLYMA10G28100	I1LAW9		I1KGD7	100789235 phospholipase D alpha 4-like
GLYMA10G28250	I1LAY2		K7MPK4	100789842 cytochrome P450 90A1-like
GLYMA10G28521	K7LJF2		I1LU53	100794803 aconitate hydratase, cytoplasmic
GLYMA10G28610	I1LB22		I1L3F9	100795422 peroxidase 66-like
GLYMA10G28710	I1LB34		I1KNG5	100797313 peroxidase 29-like
GLYMA10G29040	I1LB70		I1LQG7	100797626 linoleate 13S-lipoxygenase 2-1, chloroplastic-like
GLYMA10G29700	C6SWP5		C6TK33	100798459 triosephosphate isomerase, chloroplastic-like
GLYMA10G29710	I1LBE1		K7MEA2	100798570 protein PHYLLO, chloroplastic
GLYMA10G30081	K7LJP6		K7KH90	100800065 linoleate 13S-lipoxygenase 3-1, chloroplastic-like
GLYMA10G30160	K7LJR0		I1N8A2	100800077 beta-glucosidase BoGH3B-like
GLYMA10G30180	I1LBI7		I1M3R0	100800830 probable aminotransferase TAT2
GLYMA10G31200	K7LJV8		K7LVZ2	100806124 probable terpene synthase 11
GLYMA10G31301	K7LJX2		I1NJ83	100806314 protoheme IX farnesyltransferase, mitochondrial-like
GLYMA10G31530	I1LBX1		K7MBQ9	100807970 putative glucose-6-phosphate 1-epimerase
GLYMA10G32461	K7LK46		I1KJ12	100808490 chlorophyllase-1-like
GLYMA10G32785	K7LK72		I1LAW9	100808574 DEAD-box ATP-dependent RNA helicase 3, chloroplastic-like
GLYMA10G32810	I1LC92		K7M080	100816487 peroxidase 25-like
GLYMA10G34205	K7LKF7		K7LEH7	102668851 aldose 1-epimerase-like
GLYMA10G35290	I1LCY6		Q9SPJ5	548087 dihydroflavonol-4-reductase DFR1
GLYMA10G35587	K7LKM6	gmx04075 Plant hormone signal transduction (10)	K7LZD6	100779400 auxin-responsive protein IAA11-like
GLYMA10G35781	K7LKP5		I1L8D5	100780775 ethylene-responsive transcription factor 1B-like
GLYMA10G35910	I1LD56		I1KBS6	100786190 serine/threonine-protein kinase SRK2A-like
GLYMA10G35960	I1LD65		K7MYP4	100801682 ethylene-responsive transcription factor 1B-like
GLYMA10G36260	I1LD96		K7KPS2	100804180 BRASSINOSTEROID INSENSITIVE 1-associated receptor kinase 1-like
GLYMA10G38031	K7LL27		K7MER4	100804965 transcription factor MYC2-like
GLYMA10G38050	I1LDR9		I1KLU0	100805830 mitogen-activated protein kinase homolog MMK1-like
GLYMA10G39041	K7LL77		I1M054	100808119 auxin response factor 3-like
GLYMA10G39660	I1LE76		K7N4T6	100810762 auxin-responsive protein IAA14-like
GLYMA10G39800	K7LLC8		I1M3Z9	100818961 indole-3-acetic acid-amido synthetase GH3.6-like
GLYMA10G39850	K7LLD3	gmx04141 Protein processing in endoplasmic reticulum (9)	I1L7R5	100037470 protein disufide isomerase-like protein
GLYMA10G39950	K7LLD8		C6SZ88	100306406 uncharacterized LOC100306406
GLYMA10G40010	I1LEA9		C6SWU0	100499801 uncharacterized LOC100499801
GLYMA10G40070	I1LEB4		I1LQV6	100785630 protein disulfide isomerase-like 1-4
GLYMA10G40090	K7LLE6		K7LEW9	100788389 serine/threonine-protein kinase/endoribonuclease IRE1a-like
GLYMA10G40450	I1LEF6		I1L0Y9	100789271 chaperone protein dnaJ 49-like
GLYMA10G40701	K7LLI0		I1LK05	100807536 ubiquitin fusion degradation protein 1 homolog
GLYMA10G40870	I1LEJ7		I1N055	100809457 uncharacterized LOC100809457
GLYMA10G41200	K7LLL3		Q9SEH8	547540 MAN1; mannosyl-oligosaccharide 1,2-alpha-mannosidase
GLYMA10G41300	I1LEN8	gmx04016 MAPK signaling pathway - plant (8)	I1L8D5	100780775 ethylene-responsive transcription factor 1B-like
GLYMA10G41573	K7LLQ0		I1KBS6	100786190 serine/threonine-protein kinase SRK2A-like
GLYMA10G41661	K7LLQ1		I1MAM7	100798028 mitogen-activated protein kinase kinase kinase 1-like
GLYMA10G42350	I1LEZ3		K7MYP4	100801682 ethylene-responsive transcription factor 1B-like
GLYMA10G42420	K7LLU9		K7KPS2	100804180 BRASSINOSTEROID INSENSITIVE 1-associated receptor kinase 1-like
GLYMA10G42740	I1LF37		K7MER4	100804965 transcription factor MYC2-like
GLYMA10G43131	K7LLZ8		I1KLU0	100805830 mitogen-activated protein kinase homolog MMK1-like
GLYMA10G43265	K7LM04		K7M7G9	100819177 mitogen-activated protein kinase kinase kinase 1-like
GLYMA11G01595	K7LMI3	gmx03010 Ribosome (6)	C6SW18	100305649 uncharacterized LOC100305649
GLYMA11G01730	K7LMI8		C6SW35	100499742 uncharacterized LOC100499742
GLYMA11G01911	K7LMJ9		K7M324	100791682 60S acidic ribosomal protein P2B
GLYMA11G01940	I1LG74		I1NA53	100796712 60S ribosomal protein L4-like
GLYMA11G02160	K7LML3		I1MJD8	100805664 50S ribosomal protein L7/L12-like
GLYMA11G02210	K7LML8		Q2PMR2	3989320 rps18; 30S ribosomal protein S18
GLYMA11G02480	K7LMM7	gmx04626 Plant-pathogen interaction (6)	I1K6C6	100777096 calcium-dependent protein kinase 3-like
GLYMA11G02490	I1LGE6		I1N0L8	100784890 disease resistance protein RPM1-like
GLYMA11G02760	K7LMQ3		I1MAM7	100798028 mitogen-activated protein kinase kinase kinase 1-like
GLYMA11G02765	K7LMQ4		K7KPS2	100804180 BRASSINOSTEROID INSENSITIVE 1-associated receptor kinase 1-like
GLYMA11G03031	K7LMR0		I1JHM5	100817278 pathogenesis-related genes transcriptional activator PTI6-like
GLYMA11G03090	I1LGK0		K7M7G9	100819177 mitogen-activated protein kinase kinase kinase 1-like
GLYMA11G03140	I1LGK5	gmx03040 Spliceosome (6)	I1NCV6	100778665 intron-binding protein aquarius-like
GLYMA11G03770	K7LMV7		K7MCW9	100787646 SART-1 family protein DOT2-like
GLYMA11G03790	I1LGS4		K7KYQ4	100793801 splicing factor U2af large subunit B-like
GLYMA11G03835	K7LMW1		I1NJ40	100794094 pre-mRNA-splicing factor 38-like
GLYMA11G03930	I1LGT4		K7MB77	100806371 DEAD-box ATP-dependent RNA helicase 40-like
GLYMA11G04020	C6SW18		C6T0C3	547722 DIM; thioredoxin-like protein YLS8
GLYMA11G04301	K7LMY6	gmx01230 Biosynthesis of amino acids (5)	I1K5P1	100499845 argininosuccinate synthase, chloroplastic
GLYMA11G05540	K7LN58		C6TEY0	100781076 shikimate kinase, chloroplastic-like
GLYMA11G05620	I1LHA9		I1LU53	100794803 aconitate hydratase, cytoplasmic
GLYMA11G05720	I1LHC4		C6TK33	100798459 triosephosphate isomerase, chloroplastic-like
GLYMA11G05790	K7LN69		I1M3R0	100800830 probable aminotransferase TAT2
GLYMA11G06020	K7LN78	gmx00940 Phenylpropanoid biosynthesis (5)	I1MSN7	100777532 spermidine hydroxycinnamoyl transferase-like
GLYMA11G06270	K7LN97		I1L3F9	100795422 peroxidase 66-like
GLYMA11G06300	I1LHH9		I1KNG5	100797313 peroxidase 29-like
GLYMA11G06451	K7LNA3		I1N8A2	100800077 beta-glucosidase BoGH3B-like
GLYMA11G06480	I1LHJ6		K7M080	100816487 peroxidase 25-like
GLYMA11G06711	K7LNC6	gmx00520 Amino sugar and nucleotide sugar metabolism (5)	I1K0H0	100778002 UDP-glucuronate 4-epimerase 5-like
GLYMA11G06840	K7LND4		I1LN28	100786653 UDP-glucuronate 4-epimerase 6-like
GLYMA11G06911	K7LND7		I1LG74	100792137 UDP-glucose 4-epimerase GEPI48-like
GLYMA11G07050	I1LHP9		K7LGC2	100795264 probable galacturonosyltransferase 7
GLYMA11G08601	K7LNL6		I1LZM1	100796220 acidic mammalian chitinase-like
GLYMA11G08940	I1LI95	gmx03013 RNA transport (4)	I1M1W3	100783192 THO complex subunit 7A-like
GLYMA11G10140	I1LIM2		I1MJ68	100783566 serine/arginine-rich splicing factor SR45-like
GLYMA11G10270	I1LIN9		I1JS74	100799015 translation initiation factor eIF-2B subunit alpha-like
GLYMA11G10281	K7LNV4		I1LMQ7	100801853 nuclear pore complex protein NUP88-like
GLYMA11G10630	I1LIR8	gmx00010 Glycolysis / Gluconeogenesis (4)	I1LD65	100786455 dihydrolipoyllysine-residue acetyltransferase component 5 of pyruvate dehydrogenase complex, chloroplastic-like
GLYMA11G10650	I1LIS0		C6TK33	100798459 triosephosphate isomerase, chloroplastic-like
GLYMA11G11200	I1LIX9		K7MBQ9	100807970 putative glucose-6-phosphate 1-epimerase
GLYMA11G11720	I1LJ47		K7LEH7	102668851 aldose 1-epimerase-like
GLYMA11G11791	K7LP48	gmx00500 Starch and sucrose metabolism (4)	I1NCX8	100788655 endoglucanase 12-like
GLYMA11G12070	I1LJ88		K7KIP5	100796552 glucan endo-1,3-beta-glucosidase 5-like
GLYMA11G12800	I1LJG4		I1N8A2	100800077 beta-glucosidase BoGH3B-like
GLYMA11G13111	K7LPC2		K7LG54	100812659 beta-amylase 7-like
GLYMA11G13791	K7LPH9	gmx01200 Carbon metabolism (4)	I1LD65	100786455 dihydrolipoyllysine-residue acetyltransferase component 5 of pyruvate dehydrogenase complex, chloroplastic-like
GLYMA11G13955	K7LPI9		C6T9Z5	100794313 formate dehydrogenase 1, mitochondrial-like
GLYMA11G14660	I1LK05		I1LU53	100794803 aconitate hydratase, cytoplasmic
GLYMA11G14920	K7LPP4		C6TK33	100798459 triosephosphate isomerase, chloroplastic-like
GLYMA11G15451	K7LPS0	gmx00564 Glycerophospholipid metabolism (3)	I1KGD7	100789235 phospholipase D alpha 4-like
GLYMA11G15580	I1LK99		I1LPT5	100798168 probable CDP-diacylglycerol--inositol 3-phosphatidyltransferase 2
GLYMA11G15770	K7LPV4		K7KCA7	100815908 lysophospholipid acyltransferase LPEAT2-like
GLYMA11G15820	I1LKC6	gmx00510 N-Glycan biosynthesis (3)	C6SWU0	100499801 uncharacterized LOC100499801
GLYMA11G15950	K7LPW5		C6TK31	100801463 UDP-N-acetylglucosamine--dolichyl-phosphate N-acetylglucosaminephosphotransferase-like
GLYMA11G17861	K7LQ15		Q9SEH8	547540 MAN1; mannosyl-oligosaccharide 1,2-alpha-mannosidase
GLYMA11G17900	I1LKJ6	gmx03060 Protein export (3)	C6SWP5	100499792 uncharacterized LOC100499792
GLYMA11G18160	I1LKL7		I1NIQ4	100807037 sec-independent protein translocase protein TATA, chloroplastic-like
GLYMA11G18171	K7LQ30		I1N055	100809457 uncharacterized LOC100809457
GLYMA11G18255	K7LQ32	gmx04144 Endocytosis (3)	I1KGD7	100789235 phospholipase D alpha 4-like
GLYMA11G18270	K7LQ34		I1JHE9	100808189 clathrin heavy chain 1-like
GLYMA11G18390	K7LQ42		I1KE48	100815076 probable ADP-ribosylation factor GTPase-activating protein AGD5
GLYMA11G18420	I1LKN3	gmx00130 Ubiquinone and other terpenoid-quinone biosynthesis (2)	K7MEA2	100798570 protein PHYLLO, chloroplastic
GLYMA11G18455	K7LQ45		I1M3R0	100800830 probable aminotransferase TAT2
GLYMA11G18700	I1LKP1	gmx03015 mRNA surveillance pathway (2)	I1MJ68	100783566 serine/arginine-rich splicing factor SR45-like
GLYMA11G19251	K7LQ76		K7KF75	100793183 mRNA-capping enzyme-like
GLYMA11G19650	K7LQ94	gmx03410 Base excision repair (2)	K7L828	100814780 uncharacterized LOC100814780
GLYMA11G19910	I1LL03		I1JP21	100815900 poly [ADP-ribose] polymerase 1-like
GLYMA11G20500	I1LL51	gmx00905 Brassinosteroid biosynthesis (2)	I1KDA4	100786200 cytochrome P450 734A1-like
GLYMA11G20760	K7LQG9		K7MPK4	100789842 cytochrome P450 90A1-like
GLYMA11G21340	K7LQJ8	gmx00562 Inositol phosphate metabolism (2)	I1LPT5	100798168 probable CDP-diacylglycerol--inositol 3-phosphatidyltransferase 2
GLYMA11G21670	I1LLD8		C6TK33	100798459 triosephosphate isomerase, chloroplastic-like
GLYMA11G23516	K7LQP5	gmx00970 Aminoacyl-tRNA biosynthesis (2)	I1NAJ0	100784904 threonine--tRNA ligase, chloroplastic/mitochondrial 2
GLYMA11G25540	I1LLG1		I1JC08	100802879 threonine--tRNA ligase, mitochondrial 1-like
GLYMA11G25860	I1LLH2	gmx00860 Porphyrin and chlorophyll metabolism (2)	I1NJ83	100806314 protoheme IX farnesyltransferase, mitochondrial-like
GLYMA11G28160	K7LQX7		I1KJ12	100808490 chlorophyllase-1-like
GLYMA11G29430	I1LLR8	gmx00052 Galactose metabolism (2)	I1LG74	100792137 UDP-glucose 4-epimerase GEPI48-like
GLYMA11G30060	K7LR28		K7LEH7	102668851 aldose 1-epimerase-like
GLYMA11G30080	C6SXN3	gmx00591 Linoleic acid metabolism (2)	I1LQG7	100797626 linoleate 13S-lipoxygenase 2-1, chloroplastic-like
GLYMA11G33110	I1LM68		K7KH90	100800065 linoleate 13S-lipoxygenase 3-1, chloroplastic-like
GLYMA11G33251	K7LRG3	gmx00630 Glyoxylate and dicarboxylate metabolism (2)	C6T9Z5	100794313 formate dehydrogenase 1, mitochondrial-like
GLYMA11G33870	I1LME3		I1LU53	100794803 aconitate hydratase, cytoplasmic
GLYMA11G34370	K7LRL4	gmx03018 RNA degradation (2)	I1MFV0	100777151 enhancer of mRNA-decapping protein 4-like
GLYMA11G35160	I1LMQ7		I1JD46	100780204 CCR4-NOT transcription complex subunit 3-like
GLYMA11G35290	K7LRQ9	gmx04130 SNARE interactions in vesicular transport (2)	I1N120	100780765 membrin-11-like
GLYMA11G35362	K7LRR3		I1K911	100810956 syntaxin-32-like
GLYMA11G35880	I1LMX3	gmx00400 Phenylalanine, tyrosine and tryptophan biosynthesis (2)	C6TEY0	100781076 shikimate kinase, chloroplastic-like
GLYMA11G36361	K7LRW3		I1M3R0	100800830 probable aminotransferase TAT2
GLYMA11G36430	I1LN12	gmx00380 Tryptophan metabolism (2)	I1KAH8	100801203 probable indole-3-pyruvate monooxygenase YUCCA11
GLYMA11G36500	K7LRX2		K7KVP6	100820582 tryptophan aminotransferase-related protein 2-like
GLYMA11G36600	I1LN28	gmx00040 Pentose and glucuronate interconversions (2)	K7MD49	100776781 probable pectinesterase/pectinesterase inhibitor 47
GLYMA11G36800	I1LN46		I1MYL5	100782388 probable pectate lyase 5
GLYMA11G36830	I1LN48	gmx04120 Ubiquitin mediated proteolysis (2)	I1K2W5	100778869 E3 ubiquitin-protein ligase SINA-like 10
GLYMA11G36860	N/A		I1JHC4	100793506 protein DAMAGED DNA-BINDING 2-like
GLYMA11G36930	K7LRY7	gmx00592 alpha-Linolenic acid metabolism (2)	I1LQG7	100797626 linoleate 13S-lipoxygenase 2-1, chloroplastic-like
GLYMA11G37010	I1LN74		K7KH90	100800065 linoleate 13S-lipoxygenase 3-1, chloroplastic-like
GLYMA11G37040	K7LRZ6	gmx03008 Ribosome biogenesis in eukaryotes (2)	K7MZ38	100775810 WD repeat-containing protein 3-like
GLYMA11G37680	K7LS28		I1L3P5	100813909 eukaryotic translation initiation factor 6-2
GLYMA11G37870	I1LNH2	gmx00941 Flavonoid biosynthesis (2)	I1MSN7	100777532 spermidine hydroxycinnamoyl transferase-like
GLYMA11G38080	K7LS56		Q9SPJ5	548087 dihydroflavonol-4-reductase DFR1
GLYMA12G00570	I1LNQ5	gmx00565 Ether lipid metabolism (2)	I1KGD7	100789235 phospholipase D alpha 4-like
GLYMA12G00800	I1LNS8		K7KCA7	100815908 lysophospholipid acyltransferase LPEAT2-like
GLYMA12G00860	I1LNT8	gmx00790 Folate biosynthesis (2)	C6T284	100500602 uncharacterized LOC100500602
GLYMA12G00870	I1LNT9		P93164	547881 GH; gamma glutamyl hydrolase
GLYMA12G01570	I1LP19	gmx03022 Basal transcription factors (2)	I1KHA5	100783017 transcription initiation factor TFIID subunit 12b
GLYMA12G03740	I1LPT5		I1KYD8	100799998 transcription initiation factor TFIID subunit 6-like
GLYMA12G04000	N/A	gmx00020 Citrate cycle (TCA cycle) (2)	I1LD65	100786455 dihydrolipoyllysine-residue acetyltransferase component 5 of pyruvate dehydrogenase complex, chloroplastic-like
GLYMA12G04050	I1LPW5		I1LU53	100794803 aconitate hydratase, cytoplasmic
GLYMA12G04070	I1LPW6	gmx02010 ABC transporters (1)	I1MRZ2	100777713 ABC transporter B family member 4-like
GLYMA12G04650	I1LQ27	gmx03420 Nucleotide excision repair (1)	I1JHC4	100793506 protein DAMAGED DNA-BINDING 2-like
GLYMA12G04670	I1LQ29	gmx00460 Cyanoamino acid metabolism (1)	I1N8A2	100800077 beta-glucosidase BoGH3B-like
GLYMA12G04701	K7LSZ0	gmx03020 RNA polymerase (1)	I1LNT8	100787575 uncharacterized LOC100787575
GLYMA12G05840	I1LQG7	gmx00511 Other glycan degradation (1)	I1MYZ6	100804658 cytosolic endo-beta-N-acetylglucosaminidase 1-like
GLYMA12G06231	K7LT94	gmx04070 Phosphatidylinositol signaling system (1)	I1LPT5	100798168 probable CDP-diacylglycerol--inositol 3-phosphatidyltransferase 2
GLYMA12G06250	K7LT95	gmx00960 Tropane, piperidine and pyridine alkaloid biosynthesis (1)	I1M3R0	100800830 probable aminotransferase TAT2
GLYMA12G06420	K7LTA5	gmx00220 Arginine biosynthesis (1)	I1K5P1	100499845 argininosuccinate synthase, chloroplastic
GLYMA12G06540	I1LQN9	gmx01210 2-Oxocarboxylic acid metabolism (1)	I1LU53	100794803 aconitate hydratase, cytoplasmic
GLYMA12G06606	K7LTB3	gmx00250 Alanine, aspartate and glutamate metabolism (1)	I1K5P1	100499845 argininosuccinate synthase, chloroplastic
GLYMA12G07260	I1LQV6	gmx00270 Cysteine and methionine metabolism (1)	I1M3R0	100800830 probable aminotransferase TAT2
GLYMA12G07270	I1LQV7	gmx00620 Pyruvate metabolism (1)	I1LD65	100786455 dihydrolipoyllysine-residue acetyltransferase component 5 of pyruvate dehydrogenase complex, chloroplastic-like
GLYMA12G07290	I1LQV9	gmx00190 Oxidative phosphorylation (1)	I1NJ83	100806314 protoheme IX farnesyltransferase, mitochondrial-like
GLYMA12G07350	I1LQW9	gmx00051 Fructose and mannose metabolism (1)	C6TK33	100798459 triosephosphate isomerase, chloroplastic-like
GLYMA12G07420	I1LQX5	gmx00310 Lysine degradation (1)	K7LMY6	100792689 histone-lysine N-methyltransferase, H3 lysine-9 specific SUVH3-like
GLYMA12G07841	K7LTI6	gmx00945 Stilbenoid, diarylheptanoid and gingerol biosynthesis (1)	I1MSN7	100777532 spermidine hydroxycinnamoyl transferase-like
GLYMA12G08290	K7LTM1	gmx00230 Purine metabolism (1)	I1LNT8	100787575 uncharacterized LOC100787575
GLYMA12G08320	K7LTM2	gmx00710 Carbon fixation in photosynthetic organisms (1)	C6TK33	100798459 triosephosphate isomerase, chloroplastic-like
GLYMA12G08900	I1LRB5	gmx00920 Sulfur metabolism (1)	I1KNE4	100819536 5'-adenylylsulfate reductase 3, chloroplastic-like
GLYMA12G09660	I1LRI2	gmx00902 Monoterpenoid biosynthesis (1)	K7LVZ2	100806124 probable terpene synthase 11
GLYMA12G10620	K7LTZ3	gmx00195 Photosynthesis (1)	C6SWI3	100305752 uncharacterized LOC100305752
GLYMA12G11110	I1LRU1	gmx00910 Nitrogen metabolism (1)	I1MAM5	100818642 nitrate reductase [NADH] 2
GLYMA12G11548	K7LU33	gmx00900 Terpenoid backbone biosynthesis (1)	Q2N2K0	100793696 VTE5; probable phytol kinase 3, chloroplastic-like
GLYMA12G12230	I1LS00	gmx00350 Tyrosine metabolism (1)	I1M3R0	100800830 probable aminotransferase TAT2
GLYMA12G12975	K7LU91	gmx03440 Homologous recombination (1)	I1LN46	100791807 DNA topoisomerase 3-beta
GLYMA12G12990	K7LU92	gmx00360 Phenylalanine metabolism (1)	I1M3R0	100800830 probable aminotransferase TAT2
GLYMA12G13280	I1LS60	gmx03030 DNA replication (1)	K7KYE7	100799415 DNA replication ATP-dependent helicase/nuclease DNA2
GLYMA12G13315	K7LUA1	gmx00760 Nicotinate and nicotinamide metabolism (1)	K7M700	100782844 NAD kinase 2, chloroplastic-like
GLYMA12G15750	K7LUI3	gmx00240 Pyrimidine metabolism (1)	I1LNT8	100787575 uncharacterized LOC100787575
GLYMA12G15860	K7LUI8	gmx00950 Isoquinoline alkaloid biosynthesis (1)	I1M3R0	100800830 probable aminotransferase TAT2
GLYMA12G16252	K7LUK3
GLYMA12G16291	K7LUK4
GLYMA12G16526	K7LUM1
GLYMA12G16606	K7LUM7
GLYMA12G16940	K7LUP7
GLYMA12G17251	K7LUQ9
GLYMA12G17940	K7LUS2
GLYMA12G22160	I1LSY9
GLYMA12G24250	I1LT47
GLYMA12G26836	K7LV64
GLYMA12G29947	K7LVJ7
GLYMA12G30253	K7LVL9
GLYMA12G30561	K7LVN4
GLYMA12G31060	I1LTW2
GLYMA12G31090	I1LTW6
GLYMA12G32000	I1LU53
GLYMA12G32070	I1LU65
GLYMA12G32111	K7LVX0
GLYMA12G32280	I1LU87
GLYMA12G32381	K7LVZ2
GLYMA12G33020	I1LUF4
GLYMA12G33070	H9TN50
GLYMA12G33670	I1LUL1
GLYMA12G34470	I1LUT4
GLYMA12G35020	K7LWC8
GLYMA12G35411	K7LWE4
GLYMA12G35475	K7LWE8
GLYMA12G35580	K7LWF1
GLYMA12G35650	K7LWF5
GLYMA12G36371	K7LWK7
GLYMA12G36411	K7LWK8
GLYMA12G36440	I1LVC2
GLYMA12G36510	K7LWL6
GLYMA12G36540	I1LVD0
GLYMA12G36600	I1LVD6
GLYMA12G36650	I1LVE2
GLYMA13G00211	K7LWR0
GLYMA13G00380	I1LVK7
GLYMA13G00460	I1LVL3
GLYMA13G00720	I1LVN7
GLYMA13G00790	I1LVP1
GLYMA13G01050	K7LWV7
GLYMA13G01070	I1LVS3
GLYMA13G02860	K7LX44
GLYMA13G04561	K7LXC4
GLYMA13G04571	K7LXC5
GLYMA13G04580	K7LXC6
GLYMA13G05710	K7LXJ2
GLYMA13G06060	I1LWR6
GLYMA13G06870	K7LXQ0
GLYMA13G06910	I1LWX1
GLYMA13G08940	I1LX98
GLYMA13G09060	I1LXA5
GLYMA13G10090	I1LXG2
GLYMA13G10640	I1LXK1
GLYMA13G10811	K7LYA6
GLYMA13G10840	I1LXL6
GLYMA13G11150	K7LYB7
GLYMA13G11730	K7LYF1
GLYMA13G12059	K7LYM3
GLYMA13G12077	K7LYN1
GLYMA13G12170	I1LXU3
GLYMA13G12340	K7LYP5
GLYMA13G12540	K7LYQ3
GLYMA13G13466	K7LYR2
GLYMA13G14563	K7LYS7
GLYMA13G15590	K7LYT2
GLYMA13G16137	K7LYT6
GLYMA13G16490	K7LYW4
GLYMA13G16560	K7LYW5
GLYMA13G16960	K7LZ10
GLYMA13G16983	K7LZ11
GLYMA13G17220	I1LY81
GLYMA13G17890	I1LYF2
GLYMA13G18240	I1LYI3
GLYMA13G18790	K7LZC5
GLYMA13G18840	K7LZD2
GLYMA13G18910	K7LZD6
GLYMA13G19400	K7LZH3
GLYMA13G19650	K7LZJ0
GLYMA13G21063	K7LZT6
GLYMA13G21211	K7LZU4
GLYMA13G21880	K7LZX9
GLYMA13G22200	I1LZL0
GLYMA13G22310	K7M010
GLYMA13G22350	I1LZM1
GLYMA13G22595	K7M022
GLYMA13G23031	K7M049
GLYMA13G23101	K7M055
GLYMA13G23130	C6T577
GLYMA13G23470	I1LZW9
GLYMA13G23550	I1LZX7
GLYMA13G23600	K7M078
GLYMA13G23620	K7M080
GLYMA13G23760	C6SYA4
GLYMA13G23790	C6T9Z5
GLYMA13G23810	K7M088
GLYMA13G23840	I1M016
GLYMA13G23910	I1M022
GLYMA13G24240	I1M054
GLYMA13G24555	K7M0C3
GLYMA13G24590	I1M086
GLYMA13G24611	K7M0C9
GLYMA13G24940	I1M0C1
GLYMA13G24955	K7M0E0
GLYMA13G25120	I1M0D9
GLYMA13G25160	K7M0F0
GLYMA13G25181	K7M0F1
GLYMA13G25260	I1M0E6
GLYMA13G25380	I1M0F7
GLYMA13G25550	K7M0H3
GLYMA13G25740	I1M0J2
GLYMA13G25900	K7M0K1
GLYMA13G25990	K7M0K8
GLYMA13G26020	K7M0L0
GLYMA13G26040	K7M0L1
GLYMA13G26250	I1M0N7
GLYMA13G26260	I1M0N8
GLYMA13G26310	I1M0P3
GLYMA13G26470	K7M0P1
GLYMA13G27000	K7M0S7
GLYMA13G27300	K7M0U4
GLYMA13G28020	I1M156
GLYMA13G28060	I1M158
GLYMA13G28200	K7M0Y4
GLYMA13G28660	K7M122
GLYMA13G28761	K7M123
GLYMA13G29190	I1M1I1
GLYMA13G29300	I1M1J2
GLYMA13G29591	K7M171
GLYMA13G30306	K7M1C5
GLYMA13G30530	I1M1W3
GLYMA13G30860	I1M1Z5
GLYMA13G30880	I1M1Z7
GLYMA13G30950	I1M206
GLYMA13G32200	I1M2E6
GLYMA13G32420	K7M1T4
GLYMA13G33010	K7M1W1
GLYMA13G33070	K7M1W8
GLYMA13G33100	C6TGM5
GLYMA13G33560	I1M2S4
GLYMA13G33880	K7M228
GLYMA13G34187	K7M249
GLYMA13G34290	P93164
GLYMA13G34685	K7M282
GLYMA13G34690	K7M283
GLYMA13G34810	I1M340
GLYMA13G34830	K7M294
GLYMA13G34850	I1M344
GLYMA13G34950	I1M355
GLYMA13G35033	K7M2A6
GLYMA13G35080	I1M365
GLYMA13G35200	I1M379
GLYMA13G35300	I1M392
GLYMA13G35500	K7M2D4
GLYMA13G35750	I1M3D6
GLYMA13G35910	I1M3E9
GLYMA13G36520	K7M2I1
GLYMA13G36660	I1M3L7
GLYMA13G36670	I1M3L8
GLYMA13G37080	I1M3R0
GLYMA13G37285	K7M2P1
GLYMA13G37530	C6SWN3
GLYMA13G38000	I1M3Z9
GLYMA13G38621	K7M2X5
GLYMA13G38660	I1M459
GLYMA13G38710	I1M466
GLYMA13G38990	K7M2Z0
GLYMA13G39016	K7M2Z1
GLYMA13G39030	K7M2Z3
GLYMA13G39160	I1M4B5
GLYMA13G39490	K7M324
GLYMA13G39510	K7M325
GLYMA13G39620	I1M4G2
GLYMA13G39950	I1M4J1
GLYMA13G40310	I1M4M7
GLYMA13G40360	I1M4N3
GLYMA13G40400	P08960
GLYMA13G41045	K7M3E0
GLYMA13G42320	I1M597
GLYMA13G42340	I1M599
GLYMA13G43630	I1M5L7
GLYMA13G44100	P04672
GLYMA14G00600	I1M652
GLYMA14G00870	I1M678
GLYMA14G01070	K7M483
GLYMA14G01405	K7M4A3
GLYMA14G01970	I1M6J2
GLYMA14G02320	K7M4G1
GLYMA14G02385	K7M4G5
GLYMA14G02590	K7M4I4
GLYMA14G02710	I1M6S1
GLYMA14G03010	I1M6V8
GLYMA14G03020	K7M4L3
GLYMA14G03130	K7M4M1
GLYMA14G03420	I1M6Z6
GLYMA14G04433	K7M4U3
GLYMA14G04455	K7M4U7
GLYMA14G04550	N/A
GLYMA14G04710	K7M4V5
GLYMA14G04890	I1M7D1
GLYMA14G04900	K7M4W3
GLYMA14G05013	K7M4X2
GLYMA14G05180	K7M4Y2
GLYMA14G05200	K7M4Y5
GLYMA14G05470	H2BER5
GLYMA14G05730	I1M7M0
GLYMA14G05760	I1M7M1
GLYMA14G05820	K7M531
GLYMA14G05850	N/A
GLYMA14G06285	K7M546
GLYMA14G06430	I1M7T4
GLYMA14G06710	I1M7X5
GLYMA14G06930	K7M583
GLYMA14G06945	K7M584
GLYMA14G06970	I1M806
GLYMA14G07150	I1M829
GLYMA14G07160	I1M830
GLYMA14G07221	K7M5B0
GLYMA14G07510	I1M861
GLYMA14G07540	I1M863
GLYMA14G07830	I1M893
GLYMA14G07940	Q9SPJ5
GLYMA14G08350	I1M8F6
GLYMA14G08430	I1M8G3
GLYMA14G08610	I1M8H6
GLYMA14G08734	K7M5J5
GLYMA14G08748	K7M5J6
GLYMA14G08790	K7M5J9
GLYMA14G08880	I1M8J9
GLYMA14G09500	K7M5N5
GLYMA14G09580	I1M8R6
GLYMA14G09741	K7M5P5
GLYMA14G11883	K7M605
GLYMA14G12180	I1M9A6
GLYMA14G12194	K7M623
GLYMA14G12560	K7M635
GLYMA14G13333	K7M673
GLYMA14G14290	K7M6B8
GLYMA14G15820	I1M9M1
GLYMA14G17334	K7M6K3
GLYMA14G21230	I1M9Y2
GLYMA14G23840	I1MA44
GLYMA14G23870	K7M6W3
GLYMA14G24220	B2ZGR3
GLYMA14G24388	K7M6Z1
GLYMA14G24510	K7M6Z9
GLYMA14G24545	K7M700
GLYMA14G24580	K7M702
GLYMA14G24670	K7M713
GLYMA14G24730	K7M717
GLYMA14G24900	I1MA92
GLYMA14G25073	K7M723
GLYMA14G25186	K7M726
GLYMA14G27363	K7M773
GLYMA14G28376	K7M790
GLYMA14G33161	K7M7E2
GLYMA14G33490	I1MAM5
GLYMA14G33630	I1MAM7
GLYMA14G33650	K7M7G9
GLYMA14G34035	K7M7I4
GLYMA14G34681	K7M7L0
GLYMA14G35310	K7M7P1
GLYMA14G35440	K7M7Q0
GLYMA14G35650	K7M7R1
GLYMA14G35750	I1MAY4
GLYMA14G36000	K7M7S8
GLYMA14G36020	I1MB02
GLYMA14G37420	K7M817
GLYMA14G38220	C6SWU0
GLYMA14G38240	I1MBJ4
GLYMA14G39045	K7M8C2
GLYMA14G39180	I1MBS3
GLYMA14G39260	I1MBT1
GLYMA14G39451	K7M8E3
GLYMA14G39630	I1MBW8
GLYMA14G39650	I1MBX0
GLYMA14G40450	I1MC45
GLYMA14G40580	I1MC59
GLYMA15G01510	I1MCK1
GLYMA15G01540	I1MCK5
GLYMA15G01610	I1MCL9
GLYMA15G03080	K7M969
GLYMA15G03610	I1MD79
GLYMA15G04280	I1MDF1
GLYMA15G05350	I1MDQ8
GLYMA15G05551	K7M9P4
GLYMA15G05610	K7M9P5
GLYMA15G05856	K7M9Q9
GLYMA15G05970	I1MDX4
GLYMA15G06360	K7M9U9
GLYMA15G07700	I1MEE5
GLYMA15G08030	I1MEJ1
GLYMA15G08910	I1MES5
GLYMA15G08941	K7MAB8
GLYMA15G09270	K7MAD5
GLYMA15G09340	I1MEW5
GLYMA15G09420	K7MAE4
GLYMA15G09790	K7MAG8
GLYMA15G10140	I1MF38
GLYMA15G10160	C6TAG6
GLYMA15G10870	I1MFB9
GLYMA15G10880	I1MFC1
GLYMA15G10960	K7MAP4
GLYMA15G11430	I1MFH0
GLYMA15G11500	I1MFH5
GLYMA15G11520	I1MFH7
GLYMA15G11583	K7MAS3
GLYMA15G11610	K7MAS4
GLYMA15G11850	I1MFK9
GLYMA15G12510	K7MAW2
GLYMA15G12620	K7MAX0
GLYMA15G12740	I1MFT3
GLYMA15G12770	K7MAX5
GLYMA15G12850	I1MFU7
GLYMA15G12890	I1MFV0
GLYMA15G12910	K7MAY5
GLYMA15G13051	K7MB05
GLYMA15G13170	K7MB11
GLYMA15G13260	K7MB18
GLYMA15G13290	I1MG01
GLYMA15G13390	I1MG12
GLYMA15G13690	I1MG36
GLYMA15G13770	I1MG44
GLYMA15G13785	K7MB41
GLYMA15G13990	I1MG62
GLYMA15G14121	K7MB56
GLYMA15G14470	K7MB77
GLYMA15G15010	I1MGE6
GLYMA15G15700	K7MBD2
GLYMA15G16000	I1MGM8
GLYMA15G16030	C6TKW0
GLYMA15G16041	K7MBF4
GLYMA15G16100	I1MGN4
GLYMA15G16183	K7MBG5
GLYMA15G16441	K7MBI2
GLYMA15G16975	K7MBL0
GLYMA15G17430	I1MGY6
GLYMA15G17550	I1MGZ4
GLYMA15G17600	I1MGZ7
GLYMA15G17630	K7MBQ9
GLYMA15G17710	K7MBS2
GLYMA15G17920	C6T482
GLYMA15G17932	K7MBT9
GLYMA15G17968	K7MBU4
GLYMA15G18024	K7MBU7
GLYMA15G18120	I1MH45
GLYMA15G18150	I1MH47
GLYMA15G18241	K7MBW3
GLYMA15G18280	I1MH58
GLYMA15G19690	K7MC48
GLYMA15G21391	K7MCC3
GLYMA15G21400	I1MHP1
GLYMA15G21951	K7MCE4
GLYMA15G22801	K7MCH4
GLYMA15G23171	K7MCI0
GLYMA15G23180	I1MHU8
GLYMA15G23215	K7MCI5
GLYMA15G23411	K7MCJ4
GLYMA15G23450	K7MCJ7
GLYMA15G24273	K7MCM3
GLYMA15G29952	K7MCW9
GLYMA15G31290	C6TD20
GLYMA15G32300	I1MID5
GLYMA15G32330	I1MID6
GLYMA15G34636	K7MD27
GLYMA15G35221	K7MD43
GLYMA15G35290	K7MD49
GLYMA15G35330	K7MD50
GLYMA15G35435	K7MD56
GLYMA15G35440	I1MII8
GLYMA15G36085	K7MD85
GLYMA15G37410	K7MDE0
GLYMA15G37431	K7MDE2
GLYMA15G37451	K7MDE3
GLYMA15G37475	K7MDE4
GLYMA15G38125	Q2PMR2
GLYMA15G39410	K7MDN7
GLYMA15G39454	K7MDP0
GLYMA15G39642	K7MDR5
GLYMA15G39721	K7MDS0
GLYMA15G39765	K7MDS4
GLYMA15G39845	K7MDT3
GLYMA15G39924	K7MDU1
GLYMA15G40450	C6SWI3
GLYMA15G40710	I1MJ68
GLYMA15G40990	I1MJ93
GLYMA15G41000	I1MJ94
GLYMA15G41071	K7MDZ6
GLYMA15G41500	K7ME11
GLYMA15G41555	K7ME13
GLYMA15G41590	K7ME15
GLYMA15G41650	I1MJD8
GLYMA15G41901	K7ME24
GLYMA15G41986	K7ME27
GLYMA15G42450	K7ME56
GLYMA15G42460	I1MJK2
GLYMA15G42880	I1MJN1
GLYMA15G43050	I1MJP9
GLYMA15G43150	I1MJQ6
GLYMA15G43243	K7MEA0
GLYMA15G43289	K7MEA2
GLYMA16G00711	K7MEE6
GLYMA16G00820	I1MJY9
GLYMA16G01390	I1MK43
GLYMA16G01951	K7MEN3
GLYMA16G01980	I1MKB1
GLYMA16G02040	K7MEP3
GLYMA16G02100	I1MKC7
GLYMA16G02180	K7MEQ6
GLYMA16G02200	K7MEQ8
GLYMA16G02230	K7MER0
GLYMA16G02320	K7MER4
GLYMA16G02340	I1MKF0
GLYMA16G02620	K7MET2
GLYMA16G02770	K7MEU2
GLYMA16G02780	I1MKJ1
GLYMA16G03125	K7MEX5
GLYMA16G03210	I1MKN6
GLYMA16G03700	K7MF04
GLYMA16G03830	C6T284
GLYMA16G03875	K7MF14
GLYMA16G04321	K7MF39
GLYMA16G04400	I1ML09
GLYMA16G04410	I1ML10
GLYMA16G04735	K7MF62
GLYMA16G05050	I1ML78
GLYMA16G05070	K7MF75
GLYMA16G05110	I1ML85
GLYMA16G05120	I1ML86
GLYMA16G05190	I1ML94
GLYMA16G05273	K7MF97
GLYMA16G05290	I1ML98
GLYMA16G05320	K7MF98
GLYMA16G05441	K7MFA2
GLYMA16G05480	K7MFA4
GLYMA16G06050	I1MLH3
GLYMA16G06151	K7MFD3
GLYMA16G06290	K7MFE2
GLYMA16G06451	K7MFF4
GLYMA16G06645	K7MFG4
GLYMA16G06665	K7MFG5
GLYMA16G06760	K7MFH5
GLYMA16G06870	K7MFH8
GLYMA16G07071	K7MFI9
GLYMA16G07081	Q2PMM5
GLYMA16G07180	K7MFJ6
GLYMA16G07230	K7MFJ9
GLYMA16G07240	I1MLR4
GLYMA16G07526	K7MFL7
GLYMA16G08065	K7MFQ2
GLYMA16G08170	K7MFR6
GLYMA16G08390	I1MLZ9
GLYMA16G08530	K7MFT6
GLYMA16G08860	K7MFU7
GLYMA16G08975	K7MFV5
GLYMA16G09351	K7MFX4
GLYMA16G09405	K7MFX7
GLYMA16G09705	K7MFY1
GLYMA16G09930	I1MM72
GLYMA16G10760	I1MM93
GLYMA16G13493	K7MG50
GLYMA16G13540	K7MG56
GLYMA16G17542	K7MGC9
GLYMA16G21111	K7MGK9
GLYMA16G21210	I1MMS3
GLYMA16G21560	I1MMT4
GLYMA16G21580	I1MMT6
GLYMA16G21904	K7MGQ4
GLYMA16G22213	K7MGR1
GLYMA16G22354	K7MGR6
GLYMA16G22460	K7MGS1
GLYMA16G24751	K7MH58
GLYMA16G24940	I1MNC5
GLYMA16G25010	I1MNC7
GLYMA16G25032	K7MH73
GLYMA16G25045	K7MH74
GLYMA16G25071	K7MH77
GLYMA16G25110	I1MND3
GLYMA16G25140	I1MND5
GLYMA16G25361	K7MH95
GLYMA16G25370	I1MNF7
GLYMA16G25880	I1MNK2
GLYMA16G26160	I1MNM8
GLYMA16G26260	I1MNN7
GLYMA16G26590	K7MHG4
GLYMA16G26810	I1MNT1
GLYMA16G26980	K7MHI6
GLYMA16G27060	C6TEY0
GLYMA16G27090	I1MNV8
GLYMA16G27950	I1MP48
GLYMA16G28040	I1MP55
GLYMA16G28115	K7MHR3
GLYMA16G28900	I1MPC0
GLYMA16G30190	I1MPM3
GLYMA16G30430	K7MI68
GLYMA16G30561	K7MI76
GLYMA16G30815	K7MI94
GLYMA16G31475	K7MIE1
GLYMA16G31700	K7MIF6
GLYMA16G32280	I1MQ20
GLYMA16G32571	K7MIN9
GLYMA16G32980	K7MIR4
GLYMA16G33000	I1MQ93
GLYMA16G34585	K7MJ22
GLYMA17G02911	K7MJM7
GLYMA17G02981	K7MJN0
GLYMA17G03155	K7MJN7
GLYMA17G03191	K7MJN9
GLYMA17G03210	I1MRL3
GLYMA17G03280	K7MJP2
GLYMA17G03310	I1MRM2
GLYMA17G03420	K7MJP6
GLYMA17G03680	I1MRQ7
GLYMA17G03710	I1MRR0
GLYMA17G03930	I1MRS6
GLYMA17G03940	K7MJS2
GLYMA17G04020	K7MJT1
GLYMA17G04110	I1MRU4
GLYMA17G04120	I1MRU5
GLYMA17G04510	K7MJV5
GLYMA17G04520	K7MJV6
GLYMA17G04610	I1MRZ2
GLYMA17G04650	I1MRZ6
GLYMA17G04790	K7MJX3
GLYMA17G05042	K7MJY5
GLYMA17G05080	I1MS42
GLYMA17G05190	I1MS51
GLYMA17G05220	I1MS55
GLYMA17G05250	I1MS58
GLYMA17G05420	I1MS74
GLYMA17G05670	N/A
GLYMA17G06130	C6T5A6
GLYMA17G06200	I1MSG4
GLYMA17G06370	I1MSI3
GLYMA17G06450	C6TKE5
GLYMA17G06610	I1MSK8
GLYMA17G06640	I1MSL2
GLYMA17G06720	K7MK48
GLYMA17G06860	I1MSN7
GLYMA17G07920	I1MSZ8
GLYMA17G07970	I1MT03
GLYMA17G08986	K7MKK5
GLYMA17G09000	K7MKK7
GLYMA17G09260	I1MTD0
GLYMA17G09310	I1MTD7
GLYMA17G09551	K7MKP6
GLYMA17G09860	I1MTI7
GLYMA17G10860	I1MTT8
GLYMA17G10960	K7MKX1
GLYMA17G10980	I1MTV0
GLYMA17G11310	C6SYV5
GLYMA17G11631	K7ML09
GLYMA17G12020	K7ML37
GLYMA17G12481	K7ML58
GLYMA17G13371	K7MLC2
GLYMA17G13570	I1MUL3
GLYMA17G15085	K7MLL0
GLYMA17G18310	K7MM20
GLYMA17G18330	K7MM22
GLYMA17G18420	K7MM24
GLYMA17G18457	K7MM26
GLYMA17G18464	K7MM27
GLYMA17G18480	N/A
GLYMA17G18550	I1MVU5
GLYMA17G18693	K7MM34
GLYMA17G18731	K7MM35
GLYMA17G20110	K7MM63
GLYMA17G20473	K7MM89
GLYMA17G21540	I1MW20
GLYMA17G23801	K7MMF2
GLYMA17G23821	K7MMF4
GLYMA17G23830	I1MW55
GLYMA17G23840	K7MMF6
GLYMA17G25117	K7MMI7
GLYMA17G26630	K7MML4
GLYMA17G29257	K7MMQ8
GLYMA17G29710	I1MWJ4
GLYMA17G29750	I1MWJ8
GLYMA17G31940	I1MWS3
GLYMA17G32492	K7MN49
GLYMA17G34330	I1MX77
GLYMA17G35170	I1MXG3
GLYMA17G35396	K7MNL3
GLYMA17G35671	K7MNM2
GLYMA17G35880	K7MNN6
GLYMA17G36360	I1MXR8
GLYMA17G36385	K7MNR8
GLYMA17G36500	I1MXS7
GLYMA17G36600	K7MNT6
GLYMA17G37180	I1MXY6
GLYMA17G38080	I1MY63
GLYMA18G00381	K7MP54
GLYMA18G01410	I1MYJ7
GLYMA18G01434	K7MPB5
GLYMA18G01560	I1MYL5
GLYMA18G01570	K7MPC4
GLYMA18G01600	I1MYL9
GLYMA18G01660	K7MPC9
GLYMA18G01850	I1MYP4
GLYMA18G01970	N/A
GLYMA18G02120	I1MYS9
GLYMA18G02770	I1MYZ6
GLYMA18G02970	I1MZ14
GLYMA18G02980	I1MZ15
GLYMA18G03190	K7MPK2
GLYMA18G03211	K7MPK4
GLYMA18G03250	I1MZ36
GLYMA18G03591	K7MPM7
GLYMA18G03750	K7MPN4
GLYMA18G03860	K7MPN9
GLYMA18G04060	K7MPQ1
GLYMA18G04090	I1MZB0
GLYMA18G04140	K7MPQ7
GLYMA18G04365	K7MPS4
GLYMA18G04430	K7MPS6
GLYMA18G04580	I1MZE8
GLYMA18G04710	K7MPT8
GLYMA18G04880	K7MPV4
GLYMA18G05201	K7MPX6
GLYMA18G05441	K7MPY9
GLYMA18G05460	K7MPZ0
GLYMA18G05527	K7MPZ5
GLYMA18G05610	K7MQ03
GLYMA18G06170	I1MZS6
GLYMA18G06480	I1MZV2
GLYMA18G06490	I1MZV3
GLYMA18G06510	K7MQ59
GLYMA18G06710	Q2N2K0
GLYMA18G07661	K7MQD0
GLYMA18G07651	K7MQC8
GLYMA18G07726	K7MQD6
GLYMA18G07825	K7MQE2
GLYMA18G07900	I1N055
GLYMA18G08060	K7MQF0
GLYMA18G08630	K7MQI6
GLYMA18G08671	K7MQJ1
GLYMA18G08720	I1N0B2
GLYMA18G08870	I1N0C1
GLYMA18G08885	K7MQK8
GLYMA18G08961	K7MQL1
GLYMA18G09120	K7MQM6
GLYMA18G09421	K7MQP0
GLYMA18G09516	K7MQP4
GLYMA18G09550	K7MQP6
GLYMA18G09590	K7MQP7
GLYMA18G09758	K7MQQ4
GLYMA18G10550	I1N0L8
GLYMA18G10580	K7MQT8
GLYMA18G11390	K7MQY4
GLYMA18G11512	K7MQZ2
GLYMA18G12573	K7MR52
GLYMA18G12590	I1N0W0
GLYMA18G12646	C6T4Y0
GLYMA18G12830	K7MR70
GLYMA18G13105	K7MR85
GLYMA18G13150	K7MR95
GLYMA18G13175	K7MR96
GLYMA18G13800	I1N115
GLYMA18G14390	I1N120
GLYMA18G14655	K7MRF2
GLYMA18G14770	I1N138
GLYMA18G15050	I1N151
GLYMA18G15100	K7MRI0
GLYMA18G15950	I1N171
GLYMA18G16200	I1N183
GLYMA18G16790	K7MRQ3
GLYMA18G17143	K7MRR7
GLYMA18G17565	K7MRU4
GLYMA18G18120	K7MRV5
GLYMA18G18130	I1N1E0
GLYMA18G21030	K7MS52
GLYMA18G22830	K7MS78
GLYMA18G22940	I1N1P3
GLYMA18G23174	K7MS88
GLYMA18G28360	K7MSD6
GLYMA18G29380	I1N1U5
GLYMA18G29451	K7MSE7
GLYMA18G29605	K7MSF8
GLYMA18G32201	Q2PMP0
GLYMA18G32211	K7MSH6
GLYMA18G32760	I1N1Y7
GLYMA18G33230	I1N203
GLYMA18G34362	K7MSN0
GLYMA18G35370	I1N259
GLYMA18G38450	C6T3A8
GLYMA18G38570	I1N2E1
GLYMA18G38874	K7MT09
GLYMA18G39570	I1N2G2
GLYMA18G39625	K7MT31
GLYMA18G39791	K7MT39
GLYMA18G40340	K7MT74
GLYMA18G40590	K7MT82
GLYMA18G41090	K7MTA4
GLYMA18G41235	K7MTA7
GLYMA18G41903	K7MTC6
GLYMA18G41961	K7MTC9
GLYMA18G42180	K7MTD8
GLYMA18G42204	K7MTE0
GLYMA18G42401	K7MTE9
GLYMA18G42480	I1N2U4
GLYMA18G42620	K7MTF6
GLYMA18G42930	K7MTH7
GLYMA18G43066	K7MTI7
GLYMA18G43110	I1N2X9
GLYMA18G43300	K7MTL0
GLYMA18G43740	I1N322
GLYMA18G44053	K7MTQ5
GLYMA18G44081	K7MTQ8
GLYMA18G44180	K7MTR3
GLYMA18G44425	K7MTS6
GLYMA18G44540	K7MTT7
GLYMA18G44635	K7MTU4
GLYMA18G45140	I1N3D6
GLYMA18G45320	I1N3F1
GLYMA18G45391	K7MU03
GLYMA18G45453	K7MU08
GLYMA18G45520	K7MU14
GLYMA18G46026	K7MU46
GLYMA18G46480	N/A
GLYMA18G46490	I1N3N5
GLYMA18G46740	K7MUA5
GLYMA18G46790	K7MUB1
GLYMA18G47450	I1N3W4
GLYMA18G48070	K7MUI7
GLYMA18G48080	I1N421
GLYMA18G48126	K7MUJ1
GLYMA18G48143	K7MUJ2
GLYMA18G48343	K7MUK3
GLYMA18G48600	I1N464
GLYMA18G48670	I1N470
GLYMA18G48910	I1N491
GLYMA18G49031	K7MUQ5
GLYMA18G49177	K7MUR6
GLYMA18G49273	K7MUS3
GLYMA18G49301	K7MUS5
GLYMA18G49470	I1N4E0
GLYMA18G49480	I1N4E1
GLYMA18G49670	K7MUU8
GLYMA18G49980	I1N4I4
GLYMA18G49990	C6TD17
GLYMA18G50070	K7MUX8
GLYMA18G50300	K7MUY8
GLYMA18G50450	I1N4M5
GLYMA18G50540	I1N4N1
GLYMA18G50650	I1N4N5
GLYMA18G50681	K7MV04
GLYMA18G50840	I1N4Q2
GLYMA18G50930	K7MV27
GLYMA18G51546	K7MV70
GLYMA18G51741	K7MV82
GLYMA18G51920	I1N4Z1
GLYMA18G51960	I1N4Z4
GLYMA18G52030	K7MV96
GLYMA18G52050	K7MV97
GLYMA18G52221	K7MVA7
GLYMA18G52530	I1N546
GLYMA18G52661	K7MVD4
GLYMA18G52760	I1N567
GLYMA18G53220	I1N5A3
GLYMA18G53795	K7MVL1
GLYMA19G00510	K7MVQ1
GLYMA19G01700	I1N5X8
GLYMA19G01940	I1N5Z8
GLYMA19G02085	K7MW01
GLYMA19G02355	K7MW21
GLYMA19G02400	I1N630
GLYMA19G02420	I1N631
GLYMA19G03410	I1N696
GLYMA19G06110	K7MWJ4
GLYMA19G06911	K7MWN2
GLYMA19G06920	K7MWN3
GLYMA19G06981	K7MWN6
GLYMA19G07245	K7MWQ0
GLYMA19G07534	K7MWR0
GLYMA19G07580	K7MWR2
GLYMA19G07650	I1N6X6
GLYMA19G07665	K7MWR7
GLYMA19G07700	K7MWR9
GLYMA19G07750	I1N6Y3
GLYMA19G09370	K7MWT6
GLYMA19G09760	I1N710
GLYMA19G10040	I1N720
GLYMA19G10150	K7MWU8
GLYMA19G10720	I1N729
GLYMA19G10800	I1N730
GLYMA19G11360	K7MWW2
GLYMA19G13400	K7MWX5
GLYMA19G16710	K7MX00
GLYMA19G25280	K7MXD6
GLYMA19G27010	K7MXJ6
GLYMA19G27250	C6SZ88
GLYMA19G27650	K7MXN0
GLYMA19G27831	K7MXN8
GLYMA19G28325	K7MXQ7
GLYMA19G28452	K7MXR8
GLYMA19G28541	K7MXS4
GLYMA19G28660	I1N870
GLYMA19G29031	K7MXV2
GLYMA19G29050	I1N8A2
GLYMA19G29210	C6T1W3
GLYMA19G29497	K7MXX6
GLYMA19G30281	K7MY12
GLYMA19G30290	I1N8K6
GLYMA19G30421	K7MY19
GLYMA19G30610	K7MY30
GLYMA19G30760	K7MY39
GLYMA19G30810	I1N8P7
GLYMA19G30820	K7MY41
GLYMA19G30900	K7MY45
GLYMA19G30940	I1N8Q8
GLYMA19G31120	I1N8S9
GLYMA19G31491	K7MY70
GLYMA19G31662	K7MY83
GLYMA19G32150	I1N910
GLYMA19G32340	K7MYD7
GLYMA19G32520	K7MYE1
GLYMA19G32610	I1N949
GLYMA19G32770	I1N964
GLYMA19G33070	I1N995
GLYMA19G33140	I1N9A4
GLYMA19G33370	I1N9C7
GLYMA19G33431	K7MYI3
GLYMA19G33530	K7MYI8
GLYMA19G33720	K7MYJ7
GLYMA19G34440	I1N9N3
GLYMA19G34500	K7MYN5
GLYMA19G34605	K7MYN9
GLYMA19G34683	K7MYP3
GLYMA19G34696	K7MYP4
GLYMA19G34870	I1N9R8
GLYMA19G35470	I1N9Y4
GLYMA19G35970	I1NA26
GLYMA19G36063	K7MYX8
GLYMA19G36180	I1NA53
GLYMA19G36300	I1NA68
GLYMA19G36630	I1NA97
GLYMA19G37051	K7MZ38
GLYMA19G37240	C6T3U0
GLYMA19G37410	I1NAH6
GLYMA19G37550	I1NAJ0
GLYMA19G37900	I1NAM5
GLYMA19G38085	K7MZ92
GLYMA19G38120	I1NAP6
GLYMA19G38190	I1NAQ4
GLYMA19G38340	K7MZA2
GLYMA19G38385	K7MZA5
GLYMA19G40170	I1NBA2
GLYMA19G40840	I1NBH3
GLYMA19G41130	K7MZP4
GLYMA19G41230	I1NBM0
GLYMA19G41371	K7MZR5
GLYMA19G41700	K7MZU6
GLYMA19G41760	C6T583
GLYMA19G42400	I1NBZ9
GLYMA19G42500	K7MZZ1
GLYMA19G42690	K7N002
GLYMA19G42710	K7N003
GLYMA19G42830	I1NC40
GLYMA19G42880	K7N011
GLYMA19G43320	I1NC85
GLYMA19G43510	I1NCA5
GLYMA19G44023	K7N082
GLYMA19G44150	K7N088
GLYMA19G44220	I1NCH8
GLYMA19G44280	I1NCI6
GLYMA19G44401	K7N0A7
GLYMA19G44451	K7N0B6
GLYMA19G44510	I1NCL8
GLYMA19G44540	I1NCM4
GLYMA19G44910	I1NCQ6
GLYMA19G44916	K7N0E2
GLYMA19G44950	I1NCR2
GLYMA20G00210	I1NCV2
GLYMA20G00260	I1NCV6
GLYMA20G00540	I1NCX8
GLYMA20G00850	I1ND00
GLYMA20G01310	I1ND39
GLYMA20G01370	I1ND44
GLYMA20G01391	K7N0P2
GLYMA20G01570	I1ND62
GLYMA20G01580	I1ND63
GLYMA20G01820	K7N0R3
GLYMA20G02500	I1NDD7
GLYMA20G02561	K7N0V4
GLYMA20G02580	I1NDE1
GLYMA20G02760	I1NDF8
GLYMA20G10820	I1NE20
GLYMA20G10866	K7N1L5
GLYMA20G12940	K7N1T1
GLYMA20G20010	I1NEJ6
GLYMA20G24110	I1NF90
GLYMA20G25120	I1NFK8
GLYMA20G26490	I1NFX3
GLYMA20G27320	I1NG49
GLYMA20G27480	I1NG63
GLYMA20G27660	I1NG75
GLYMA20G28500	I1NGF9
GLYMA20G29850	K7N3R0
GLYMA20G31170	I1NH67
GLYMA20G32160	I1NHH0
GLYMA20G32865	K7N4C9
GLYMA20G32960	K7N4D5
GLYMA20G35020	I1NI79
GLYMA20G35051	K7N4R9
GLYMA20G35270	K7N4T6
GLYMA20G35280	I1NIA4
GLYMA20G35290	I1NIA5
GLYMA20G35320	I1NIA9
GLYMA20G35504	K7N4V0
GLYMA20G35650	N/A
GLYMA20G35710	I1NIE2
GLYMA20G35741	K7N4W1
GLYMA20G35790	K7N4W4
GLYMA20G35921	K7N4X7
GLYMA20G36451	K7N503
GLYMA20G36480	I1NIM2
GLYMA20G36760	I1NIQ4
GLYMA20G37560	K7N574
GLYMA20G37571	K7N575
GLYMA20G37600	I1NIX5
GLYMA20G37630	I1NIX8
GLYMA20G37690	I1NIY4
GLYMA20G37861	K7N592
GLYMA20G38250	I1NJ40
GLYMA20G38710	I1NJ83
GLYMA20G39100	I1NJC5
GLYMA20G39280	I1NJE1
GLYMA20G39305	K7N5K1
GLYMA20G39360	K7N5K2
GLYMA20G39510	K7N5K6
GLYMA02G00890	I1JB92
GLYMA02G02690	I1JBS3
GLYMA02G03200	K7K641
GLYMA02G03350	K7K646
GLYMA02G03361	K7K647
GLYMA02G03606	K7K664
GLYMA02G03655	K7K666
GLYMA02G03695	K7K669
GLYMA02G03750	I1JC08
GLYMA02G03760	I1JC09
GLYMA02G04230	I1JC53
GLYMA02G04540	I1JC85
GLYMA02G04561	K7K6C8
GLYMA02G05020	K7K6F7
GLYMA02G06790	K7K6Q4
GLYMA02G06820	C6SYG4
GLYMA02G06882	C6TJQ7
GLYMA02G07210	I1JCY5
GLYMA02G07350	K7K6T4
GLYMA02G07410	K7K6T8
GLYMA02G07530	I1JD17
GLYMA02G07830	I1JD46
GLYMA02G07895	K7K6W5
GLYMA02G07961	K7K6W8
GLYMA02G08061	K7K6X3
GLYMA02G08210	I1JD80
GLYMA02G08550	I1JDA7
GLYMA02G08570	K7K706
GLYMA02G08780	K7K713
GLYMA02G08901	K7K721
GLYMA02G08910	I1JDD6
GLYMA02G09050	I1JDE9
GLYMA02G09201	K7K739
GLYMA02G09670	I1JDK3
GLYMA02G09841	K7K790
GLYMA02G13630	I1JEK3
GLYMA02G13700	I1JEK9
GLYMA02G13740	I1JEL3
GLYMA02G14310	I1JEQ5
GLYMA02G15130	I1JEV7
GLYMA02G15270	K7K849
GLYMA02G15490	I1JEZ1
GLYMA02G15561	K7K884
GLYMA02G15550	I1JEZ9
GLYMA02G15620	K7K889
GLYMA02G15745	K7K894
GLYMA02G16280	I1JF70
GLYMA02G16650	K7K8E6
GLYMA02G16950	I1JFD9
GLYMA02G26410	K7K8V2
GLYMA02G26530	K7K8W2
GLYMA02G27171	K7K8Z0
GLYMA02G28830	I1JFZ6
GLYMA02G29380	I1JG22
GLYMA02G31011	K7K991
GLYMA02G31020	K7K992
GLYMA02G31396	K7K9A8
GLYMA02G31470	K7K9B2
GLYMA02G31837	K7K9C1
GLYMA02G32058	K7K9C7
GLYMA02G32086	K7K9C9
GLYMA02G33550	I1JGB3
GLYMA02G33830	K7K9D9
GLYMA02G33910	K7K9E2
GLYMA02G34470	I1JGD2
GLYMA02G34640	C6TK31
GLYMA02G34726	K7K9H0
GLYMA02G35443	K7K9K9
GLYMA02G35660	K7K9L8
GLYMA02G36481	K7K9R0
GLYMA02G36610	K7K9R7
GLYMA02G36630	I1JGQ7
GLYMA02G37271	K7K9V6
GLYMA02G37330	I1JGW6
GLYMA02G37470	I1JGX7
GLYMA02G37670	I1JGZ3
GLYMA02G37850	K7K9X4
GLYMA02G37910	K7K9X9
GLYMA02G38061	K7K9Y8
GLYMA02G38070	K7K9Y9
GLYMA02G38255	K7KA14
GLYMA02G38290	K7KA17
GLYMA02G38510	I1JH65
GLYMA02G38601	K7KA39
GLYMA02G38611	K7KA40
GLYMA02G38673	K7KA43
GLYMA02G38743	K7KA46
GLYMA02G38921	K7KA53
GLYMA02G38980	K7KA55
GLYMA02G39070	I1JHB9
GLYMA02G39130	I1JHC4
GLYMA02G39220	K7KA67
GLYMA02G39241	K7KA68
GLYMA02G39360	I1JHE9
GLYMA02G39365	K7KA74
GLYMA02G39421	K7KA80
GLYMA02G39470	I1JHF8
GLYMA02G39531	K7KA85
GLYMA02G39730	K7KA96
GLYMA02G39771	K7KA98
GLYMA02G40320	I1JHM5
GLYMA02G40806	K7KAG8
GLYMA02G41015	K7KAI5
GLYMA02G41240	K7KAJ6
GLYMA02G42150	I1JI57
GLYMA02G42490	I1JI97
GLYMA02G42500	I1JI98
GLYMA02G43423	K7KAZ3
GLYMA02G43521	K7KB01
GLYMA02G44250	I1JIR0
GLYMA02G44540	I1JIU4
GLYMA02G44801	K7KB79
GLYMA02G44860	I1JIY0
GLYMA02G45990	I1JJ86
GLYMA02G46180	I1JJB3
GLYMA02G46390	I1JJD4
GLYMA02G46441	K7KBI1
GLYMA02G46550	C6TIL0
GLYMA02G46750	I1JJH3
GLYMA02G46950	K7KBM2
GLYMA02G47083	K7KBN1
GLYMA03G00400	K7KBV8
GLYMA03G00430	I1JK00
GLYMA03G00610	I1JK21
GLYMA03G00780	K7KBY8
GLYMA03G01580	K7KC57
GLYMA03G01741	K7KC71
GLYMA03G01790	I1JKD5
GLYMA03G01835	K7KC79
GLYMA03G01931	K7KC89
GLYMA03G01980	K7KC92
GLYMA03G01990	K7KC93
GLYMA03G02171	K7KCA7
GLYMA03G02271	K7KCB6
GLYMA03G02310	I1JKI5
GLYMA03G02360	K7KCB8
GLYMA03G02546	K7KCD5
GLYMA03G02620	I1JKK9
GLYMA03G02895	K7KCF7
GLYMA03G02970	K7KCG1
GLYMA03G03100	K7KCH1
GLYMA03G03110	K7KCH2
GLYMA03G03170	I1JKP5
GLYMA03G03200	N/A
GLYMA03G03731	K7KCJ7
GLYMA03G03950	K7KCL2
GLYMA03G04030	K7KCL5
GLYMA03G04100	K7KCM0
GLYMA03G04121	K7KCM3
GLYMA03G04380	I1JKY0
GLYMA03G04410	I1JKY2
GLYMA03G04480	I1JKY6
GLYMA03G04651	K7KCQ3
GLYMA03G04780	I1JL05
GLYMA03G05030	K7KCR3
GLYMA03G05095	K7KCR6
GLYMA03G05570	K7KCT9
GLYMA03G06360	I1JL77
GLYMA03G06483	K7KCY5
GLYMA03G06804	K7KCZ6
GLYMA03G06950	K7KD03
GLYMA03G06976	K7KD04
GLYMA03G07121	K7KD09
GLYMA03G07323	K7KD25
GLYMA03G07411	K7KD30
GLYMA03G07550	K7KD34
GLYMA03G07910	I1JLF2
GLYMA03G08050	K7KD57
GLYMA03G08679	K7KD73
GLYMA03G08910	K7KD85
GLYMA03G09061	K7KD92
GLYMA03G12080	I1JLM5
GLYMA03G12251	K7KDE5
GLYMA03G14180	K7KDG2
GLYMA03G14640	I1JLR7
GLYMA03G14960	K7KDI7
GLYMA03G16296	K7KDL7
GLYMA03G16450	I1JLY4
GLYMA03G17360	K7KDP5
GLYMA03G17384	K7KDP7
GLYMA03G18170	K7KDQ0
GLYMA03G18430	I1JM24
GLYMA03G20260	K7KDT9
GLYMA03G21620	I1JM64
GLYMA03G22060	I1JM77
GLYMA03G22071	K7KDV8
GLYMA03G22190	I1JM82
GLYMA03G22945	K7KE01
GLYMA03G23881	K7KE28
GLYMA03G24216	K7KE48
GLYMA03G24250	K7KE50
GLYMA03G24320	I1JMH8
GLYMA03G24660	I1JMJ0
GLYMA03G24690	K7KE70
GLYMA03G25790	C6SY94
GLYMA03G26796	K7KEG2
GLYMA03G27195	K7KEH7
GLYMA03G28860	I1JN94
GLYMA03G29160	K7KEU7
GLYMA03G29250	I1JNC4
GLYMA03G29280	I1JNC7
GLYMA03G29431	K7KEW7
GLYMA03G29460	K7KEX2
GLYMA03G29701	K7KEZ7
GLYMA03G29721	K7KEZ8
GLYMA03G30516	K7KF48
GLYMA03G30530	I1JNQ1
GLYMA03G30600	I1JNQ4
GLYMA03G30870	K7KF75
GLYMA03G31000	I1JNU1
GLYMA03G31820	I1JP21
GLYMA03G31930	I1JP30
GLYMA03G32540	K7KFK1
GLYMA03G33120	K7KFP6
GLYMA03G33311	K7KFQ5
GLYMA03G33770	I1JPL8
GLYMA03G33930	K7KFT5
GLYMA03G35040	I1JPZ0
GLYMA03G37191	K7KGB4
GLYMA03G37510	I1JQP4
GLYMA03G37730	I1JQR2
GLYMA03G38570	I1JR02
GLYMA03G39020	I1JR47
GLYMA03G39250	K7KGL4
GLYMA03G39781	K7KGP3
GLYMA03G42090	I1JS27
GLYMA03G42175	K7KH55
GLYMA03G42301	K7KH74
GLYMA03G42360	I1JS65
GLYMA03G42430	I1JS74
GLYMA03G42500	K7KH90
GLYMA04G00340	I1JSC2
GLYMA04G00680	I1JSF5
GLYMA04G00741	K7KHF2
GLYMA04G00890	I1JSH7
GLYMA04G00910	K7KHG1
GLYMA04G01770	K7KHL3
GLYMA04G01971	K7KHN2
GLYMA04G02021	K7KHN5
GLYMA04G02060	I1JSX0
GLYMA04G02190	K7KHP0
GLYMA04G02960	I1JT58
GLYMA04G03011	K7KHS8
GLYMA04G03040	I1JT68
GLYMA04G03270	I1JT90
GLYMA04G03300	K7KHU3
GLYMA04G03340	I1JTA1
GLYMA04G03420	C6SX97
GLYMA04G03540	K7KHV7
GLYMA04G03560	I1JTC7
GLYMA04G03661	K7KHW2
GLYMA04G06681	K7KIG1
GLYMA04G06810	I1JU99
GLYMA04G07820	K7KIP5
GLYMA04G08000	I1JUM8
GLYMA04G08085	K7KIR6
GLYMA04G08131	K7KIR9
GLYMA04G08700	K7KIV7
GLYMA04G08847	K7KIW5
GLYMA04G08854	K7KIW6
GLYMA04G09020	I1JUW6
GLYMA04G09630	K7KJ13
GLYMA04G09880	K7KJ30
GLYMA04G09965	K7KJ35
GLYMA04G10151	K7KJ53
GLYMA04G10481	K7KJ72
GLYMA04G10950	I1JVD5
GLYMA04G12064	K7KJC9
GLYMA04G21413	K7KK30
GLYMA04G21470	I1JW87
GLYMA04G22020	K7KK36
GLYMA04G26230	I1JWF3
GLYMA04G26810	K7KK95
GLYMA04G32270	K7KKG1
GLYMA04G33950	I1JWX1
GLYMA04G36580	I1JXE9
GLYMA04G38330	I1JXW0
GLYMA04G39110	I1JY21
GLYMA04G39850	I1JY98
GLYMA04G39980	I1JYB3
GLYMA04G40020	I1JYB7
GLYMA04G40150	I1JYC9
GLYMA04G40170	I1JYD1
GLYMA04G40220	K7KLP9
GLYMA04G40276	K7KLQ3
GLYMA04G40325	K7KLR2
GLYMA04G40450	I1JYG1
GLYMA04G40570	K7KLS2
GLYMA04G40740	I1JYJ0
GLYMA04G40823	C6T3M7
GLYMA04G40861	K7KLU2
GLYMA04G40970	I1JYL1
GLYMA04G41701	K7KLZ5
GLYMA04G41800	I1JYV9
GLYMA04G41845	K7KLZ9
GLYMA04G41870	I1JYW6
GLYMA04G41960	I1JYX3
GLYMA04G42054	K7KM32
GLYMA04G42120	I1JYY5
GLYMA04G42174	K7KM41
GLYMA04G42182	K7KM44
GLYMA04G42280	K7KM50
GLYMA04G42405	K7KM54
GLYMA04G42441	K7KM56
GLYMA04G42470	I1JZ20
GLYMA04G43011	K7KM78
GLYMA04G43310	I1JZA9
GLYMA05G01090	I1JZP8
GLYMA05G01100	K7KMJ1
GLYMA05G01770	I1JZW5
GLYMA05G03210	I1K0A0
GLYMA05G03281	K7KMW6
GLYMA05G03660	C6TNA0
GLYMA05G03800	K7KN01
GLYMA05G03830	I1K0H0
GLYMA05G04180	I1K0K3
GLYMA05G04320	I1K0L9
GLYMA05G04350	I1K0M3
GLYMA05G04390	I1K0M5
GLYMA05G04470	I1K0N2
GLYMA05G04590	K7KN38
GLYMA05G04610	I1K0P8
GLYMA05G05221	K7KN73
GLYMA05G08001	K7KNH6
GLYMA05G08140	I1K1C3
GLYMA05G08300	I1K1E0
GLYMA05G08470	K7KNK5
GLYMA05G08570	I1K1G1
GLYMA05G08680	I1K1H3
GLYMA05G09100	K7KNP7
GLYMA05G09190	C6TL11
GLYMA05G09370	I1K1Q2
GLYMA05G17994	K7KP56
GLYMA05G18342	K7KP66
GLYMA05G18376	K7KP68
GLYMA05G21440	K7KPB4
GLYMA05G21820	I1K2A3
GLYMA05G22460	K7KPG8
GLYMA05G24770	K7KPS2
GLYMA05G25270	I1K2V0
GLYMA05G25420	I1K2W5
GLYMA05G25630	I1K2Y2
GLYMA05G25720	K7KPW4
GLYMA05G26940	I1K3C7
GLYMA05G26990	I1K3D2
GLYMA05G27480	I1K3H2
GLYMA05G27560	K7KQ84
GLYMA05G27621	K7KQ87
GLYMA05G28050	K7KQA8
GLYMA05G28230	I1K3P9
GLYMA05G28340	I1K3Q9
GLYMA05G28400	I1K3R6
GLYMA05G28540	K7KQD8
GLYMA05G28790	I1K3V8
GLYMA05G28850	I1K3W3
GLYMA05G28950	I1K3X4
GLYMA05G29215	K7KQI8
GLYMA05G29220	K7KQI9
GLYMA05G29240	K7KQJ0
GLYMA05G29280	I1K414
GLYMA05G29420	K7KQJ9
GLYMA05G29460	K7KQK0
GLYMA05G29641	K7KQK6
GLYMA05G29921	K7KQM9
GLYMA05G32270	I1K4W6
GLYMA05G32281	K7KR50
GLYMA05G32445	K7KR58
GLYMA05G32630	I1K505
GLYMA05G32740	K7KR76
GLYMA05G32750	K7KR77
GLYMA05G32770	K7KR80
GLYMA05G32841	K7KR82
GLYMA05G33150	I1K550
GLYMA05G33270	I1K560
GLYMA05G33820	I1K5C1
GLYMA05G34360	C5NTE7
GLYMA05G34650	I1K5L1
GLYMA05G34680	I1K5L6
GLYMA05G34870	I1K5N7
GLYMA05G34890	I1K5P0
GLYMA05G34900	I1K5P1
GLYMA05G35151	K7KRL4
GLYMA05G35190	I1K5S7
GLYMA05G35270	I1K5T4
GLYMA05G35440	K7KRN1
GLYMA05G35550	I1K5V9
GLYMA05G35721	K7KRQ3
GLYMA05G35781	K7KRR1
GLYMA05G35820	I1K5Y6
GLYMA05G36170	I1K626
GLYMA05G36380	I1K647
GLYMA05G36760	K7KRV7
GLYMA05G36930	I1K6A1
GLYMA05G36963	C6SW29
GLYMA05G36970	I1K6A3
GLYMA05G37260	I1K6C6
GLYMA05G37530	K7KS06
GLYMA05G37580	K7KS12
GLYMA05G37740	I1K6H6
GLYMA05G37830	I1K6I8
GLYMA05G37891	K7KS34
GLYMA05G37930	I1K6K2
GLYMA05G38030	I1K6L3
GLYMA05G38231	K7KS64
GLYMA05G38360	I1K6Q7
GLYMA05G38370	K7KS68
GLYMA05G38460	K7KS73
GLYMA05G38580	K7KS83
GLYMA06G01087	K7KSE0
GLYMA06G01620	I1K784
GLYMA06G02366	K7KSL1
GLYMA06G02373	K7KSL2
GLYMA06G02540	I1K7I4
GLYMA06G02921	K7KSP9
GLYMA06G03551	K7KSU6
GLYMA06G03600	K7KSV2
GLYMA06G03930	K7KSX0
GLYMA06G04100	K7KSX5
GLYMA06G04346	K7KSZ9
GLYMA06G04353	K7KT00
GLYMA06G04510	I1K817
GLYMA06G05310	I1K8B2
GLYMA06G06190	K7KTC3
GLYMA06G07301	K7KTJ7
GLYMA06G07600	I1K8Z3
GLYMA06G07760	I1K911
GLYMA06G07966	K7KTQ0
GLYMA06G08345	K7KTS3
GLYMA06G09150	I1K9F5
GLYMA06G09650	I1K9K9
GLYMA06G10290	I1K9S6
GLYMA06G11361	K7KUF2
GLYMA06G11741	K7KUH5
GLYMA06G11951	K7KUI5
GLYMA06G11960	K7KUI8
GLYMA06G12510	I1KAG1
GLYMA06G12580	I1KAG8
GLYMA06G12650	I1KAH8
GLYMA06G13671	K7KUU3
GLYMA06G13740	I1KAW5
GLYMA06G13960	I1KAZ6
GLYMA06G14000	I1KAZ9
GLYMA06G14060	I1KB05
GLYMA06G14521	K7KUZ2
GLYMA06G14571	K7KUZ7
GLYMA06G14590	I1KB54
GLYMA06G15050	I1KBA6
GLYMA06G15100	I1KBB3
GLYMA06G15123	K7KV37
GLYMA06G15220	I1KBC5
GLYMA06G15550	I1KBG6
GLYMA06G15840	I1KBI8
GLYMA06G16780	I1KBS6
GLYMA06G17250	I1KBX2
GLYMA06G17700	K7KVJ3
GLYMA06G17910	I1KC37
GLYMA06G17940	I1KC45
GLYMA06G18150	I1KC74
GLYMA06G18170	I1KC76
GLYMA06G18710	I1KCB3
GLYMA06G18781	K7KVN9
GLYMA06G18880	K7KVP6
GLYMA06G18985	K7KVQ5
GLYMA06G19380	I1KCG1
GLYMA06G19390	I1KCG2
GLYMA06G19441	K7KVT0
GLYMA06G20081	K7KVV8
GLYMA06G20310	I1KCQ0
GLYMA06G20860	I1KCT5
GLYMA06G21315	K7KW12
GLYMA06G21442	K7KW20
GLYMA06G21440	I1KCX1
GLYMA06G22136	K7KW67
GLYMA06G22296	K7KW79
GLYMA06G22545	K7KW87
GLYMA06G22760	I1KD42
GLYMA06G22781	K7KW97
GLYMA06G22804	K7KWA0
GLYMA06G23234	K7KWC0
GLYMA06G23630	K7KWD9
GLYMA06G24540	I1KDA4
GLYMA06G24620	K7KWH0
GLYMA06G24715	K7KWH6
GLYMA06G28580	K7KWK5
GLYMA06G29790	I1KDG1
GLYMA06G30612	K7KWN9
GLYMA06G32693	K7KWR3
GLYMA06G32700	K7KWR5
GLYMA06G34387	K7KWU7
GLYMA06G35786	K7KWY0
GLYMA06G36590	C6TJW6
GLYMA06G36670	I1KDU7
GLYMA06G37915	K7KX51
GLYMA06G37950	K7KX52
GLYMA06G38725	K7KX87
GLYMA06G39232	K7KX98
GLYMA06G39444	K7KXA4
GLYMA06G39581	K7KXA7
GLYMA06G39673	K7KXB1
GLYMA06G39690	I1KE48
GLYMA06G39810	I1KE57
GLYMA06G40161	K7KXD6
GLYMA06G40420	K7KXE5
GLYMA06G40601	K7KXF5
GLYMA06G40710	I1KE93
GLYMA06G40720	K7KXF9
GLYMA06G40820	K7KXG4
GLYMA06G40841	K7KXG8
GLYMA06G40920	I1KEB0
GLYMA06G41117	K7KXI5
GLYMA06G41140	K7KXI6
GLYMA06G41276	K7KXJ4
GLYMA06G41318	K7KXJ8
GLYMA06G41326	K7KXJ9
GLYMA06G41380	K7KXK5
GLYMA06G41404	K7KXK7
GLYMA06G41430	I1KEE0
GLYMA06G41785	K7KXN5
GLYMA06G43000	I1KEN0
GLYMA06G43130	K7KXT5
GLYMA06G43546	K7KXV3
GLYMA06G43610	I1KET3
GLYMA06G43641	K7KXX0
GLYMA06G43711	K7KXX6
GLYMA06G43721	K7KXX9
GLYMA06G43760	I1KEU6
GLYMA06G43800	I1KEU9
GLYMA06G44330	I1KEY5
GLYMA06G44476	K7KY18
GLYMA06G44701	K7KY31
GLYMA06G44770	K7KY34
GLYMA06G44780	I1KF20
GLYMA06G44810	I1KF24
GLYMA06G45120	K7KY60
GLYMA06G45171	K7KY63
GLYMA06G45261	K7KY67
GLYMA06G45331	K7KY70
GLYMA06G45490	I1KF79
GLYMA06G45531	K7KY77
GLYMA06G45880	K7KY96
GLYMA06G46021	K7KYA4
GLYMA06G46627	K7KYD8
GLYMA06G46721	K7KYE7
GLYMA06G47025	K7KYG4
GLYMA06G47070	I1KFL9
GLYMA06G47300	K7KYH8
GLYMA06G47370	K7KYJ1
GLYMA06G47450	I1KFQ2
GLYMA06G47540	K7KYJ7
GLYMA06G47580	K7KYJ9
GLYMA06G47810	I1KFT5
GLYMA06G47870	I1KFU2
GLYMA06G48231	K7KYQ4
GLYMA07G01050	K7KYX4
GLYMA07G01310	I1KGD7
GLYMA07G01630	I1KGG4
GLYMA07G01671	K7KZ08
GLYMA07G01740	I1KGH7
GLYMA07G01770	K7KZ13
GLYMA07G01851	K7KZ22
GLYMA07G02350	I1KGQ0
GLYMA07G03790	I1KH55
GLYMA07G04200	I1KHA5
GLYMA07G04280	K7KZJ2
GLYMA07G04560	I1KHD6
GLYMA07G04620	I1KHE2
GLYMA07G05250	I1KHK5
GLYMA07G06230	I1KHW1
GLYMA07G06440	K7KZW7
GLYMA07G06820	K7KZZ0
GLYMA07G06840	I1KI23
GLYMA07G06990	I1KI31
GLYMA07G07250	K7L024
GLYMA07G07290	I1KI61
GLYMA07G07360	I1KI68
GLYMA07G07440	I1KI77
GLYMA07G08550	K7L0B8
GLYMA07G08620	K7L0D0
GLYMA07G09280	I1KIP3
GLYMA07G09380	K7L0G1
GLYMA07G09420	I1KIQ3
GLYMA07G09850	I1KIU4
GLYMA07G09990	I1KIV4
GLYMA07G10080	I1KIW1
GLYMA07G10150	K7L0J5
GLYMA07G10460	I1KIZ4
GLYMA07G10860	I1KJ12
GLYMA07G11150	K7L0S1
GLYMA07G11280	I1KJ32
GLYMA07G11290	K7L0S6
GLYMA07G11300	I1KJ34
GLYMA07G11495	K7L0U0
GLYMA07G11800	I1KJ78
GLYMA07G12180	K7L0Y5
GLYMA07G15260	I1KJT1
GLYMA07G15281	K7L1E2
GLYMA07G15310	I1KJT6
GLYMA07G15590	K7L1F4
GLYMA07G16450	I1KK34
GLYMA07G16510	I1KK37
GLYMA07G16860	I1KK63
GLYMA07G17250	I1KK90
GLYMA07G17380	I1KK97
GLYMA07G17490	I1KKA5
GLYMA07G18225	K7L1V8
GLYMA07G18890	K7L1X7
GLYMA07G19021	K7L1Y2
GLYMA07G19040	K7L1Y4
GLYMA07G19180	I1KKK2
GLYMA07G20920	K7L238
GLYMA07G21640	K7L254
GLYMA07G22340	K7L258
GLYMA07G24292	K7L271
GLYMA07G28040	K7L2E0
GLYMA07G28990	I1KL09
GLYMA07G30360	I1KL77
GLYMA07G30771	K7L2L2
GLYMA07G30800	I1KLC0
GLYMA07G31000	I1KLE0
GLYMA07G31560	I1KLJ0
GLYMA07G31811	K7L2R2
GLYMA07G32150	I1KLP5
GLYMA07G32276	K7L2T4
GLYMA07G32450	I1KLR4
GLYMA07G32480	I1KLR6
GLYMA07G32590	I1KLS6
GLYMA07G32620	I1KLS9
GLYMA07G32640	K7L2V8
GLYMA07G32710	I1KLT7
GLYMA07G32720	I1KLT8
GLYMA07G32750	I1KLU0
GLYMA07G33640	I1KM08
GLYMA07G36851	K7L3J9
GLYMA07G39130	I1KNE4
GLYMA07G39250	K7L3Y2
GLYMA07G39290	I1KNG5
GLYMA07G39410	I1KNH8
GLYMA08G01620	I1KP87
GLYMA08G02245	K7L4G6
GLYMA08G02300	K7L4G9
GLYMA08G02345	K7L4H4
GLYMA08G02970	K7L4L6
GLYMA08G03080	I1KPP8
GLYMA08G03250	K7L4N6
GLYMA08G03270	K7L4N7
GLYMA08G03460	I1KPT7
GLYMA08G03480	C6SW35
GLYMA08G03525	K7L4P7
GLYMA08G03590	I1KPV2
GLYMA08G03710	I1KPW4
GLYMA08G03890	K7L4Q8
GLYMA08G04070	K7L4R6
GLYMA08G04210	I1KQ12
GLYMA08G04241	K7L4S9
GLYMA08G04290	I1KQ18
GLYMA08G05521	K7L514
GLYMA08G05831	K7L532
GLYMA08G05840	K7L533
GLYMA08G09120	I1KRH6
GLYMA08G10660	I1KRY4
GLYMA08G10930	K7L5W1
GLYMA08G11825	K7L626
GLYMA08G12080	I1KSC3
GLYMA08G13100	I1KSM9
GLYMA08G13470	I1KSS0
GLYMA08G13635	K7L6B9
GLYMA08G14080	K7L6F9
GLYMA08G16346	K7L6X7
GLYMA08G16800	K7L705
GLYMA08G16880	I1KTR5
GLYMA08G18801	K7L7C3
GLYMA08G20120	I1KUP1
GLYMA08G20210	I1KUQ2
GLYMA08G20350	K7L7K3
GLYMA08G20360	K7L7K5
GLYMA08G20700	C6SXM6
GLYMA08G21430	I1KV13
GLYMA08G21630	K7L7S9
GLYMA08G21650	I1KV37
GLYMA08G22160	I1KV95
GLYMA08G22900	I1KVH1
GLYMA08G23110	K7L806
GLYMA08G23391	K7L828
GLYMA08G23510	C6T4Z8
GLYMA08G23590	I1KVP5
GLYMA08G23730	Q9SEH8
GLYMA08G25140	I1KW31
GLYMA08G26010	I1KW85
GLYMA08G26070	I1KW91
GLYMA08G26090	I1KW96
GLYMA08G26123	K7L8I4
GLYMA08G26150	I1KWA0
GLYMA08G27090	I1KWF9
GLYMA08G27210	I1KWG6
GLYMA08G27646	K7L8R2
GLYMA08G27777	K7L8R7
GLYMA08G27830	K7L8S2
GLYMA08G28175	K7L8U4
GLYMA08G28320	I1KWN1
GLYMA08G28400	I1KWN6
GLYMA08G28571	K7L8V5
GLYMA08G28580	I1KWP7
GLYMA08G28765	K7L8W2
GLYMA08G28880	I1KWR2
GLYMA08G39910	K7L9K2
GLYMA08G43102	K7LA62
GLYMA08G43140	I1KYA6
GLYMA08G43155	K7LA64
GLYMA08G43190	K7LA65
GLYMA08G43200	K7LA66
GLYMA08G43258	K7LA71
GLYMA08G43266	K7LA72
GLYMA08G43274	K7LA73
GLYMA08G43490	I1KYD8
GLYMA08G43576	K7LA94
GLYMA08G43590	I1KYE8
GLYMA08G44510	K7LAD3
GLYMA08G44530	I1KYM9
GLYMA08G45130	I1KYU0
GLYMA08G45585	K7LAK6
GLYMA08G46130	I1KZ24
GLYMA08G46145	K7LAM8
GLYMA08G46360	I1KZ48
GLYMA08G46430	I1KZ54
GLYMA08G46596	K7LAQ2
GLYMA08G46641	K7LAQ5
GLYMA08G47240	I1KZD3
GLYMA08G47830	I1KZJ5
GLYMA08G48101	K7LAY2
GLYMA09G00595	K7LB39
GLYMA09G00711	K7LB48
GLYMA09G01080	I1KZW8
GLYMA09G01240	K7LB65
GLYMA09G01750	K7LB95
GLYMA09G01795	K7LB97
GLYMA09G02690	I1L0E0
GLYMA09G03690	I1L0M9
GLYMA09G03731	K7LBK5
GLYMA09G03740	K7LBK6
GLYMA09G03900	I1L0P8
GLYMA09G04850	I1L0Y2
GLYMA09G04930	I1L0Y9
GLYMA09G05050	K7LBT4
GLYMA09G05300	K7LBU6
GLYMA09G05340	I1L130
GLYMA09G05520	I1L145
GLYMA09G05781	K7LBW3
GLYMA09G06180	I1L198
GLYMA09G06330	K7LC01
GLYMA09G06365	K7LC02
GLYMA09G06755	K7LC23
GLYMA09G06760	K7LC24
GLYMA09G06950	I1L1F8
GLYMA09G07010	C6T4H6
GLYMA09G07020	K7LC39
GLYMA09G07040	C6TCR3
GLYMA09G07051	K7LC40
GLYMA09G07090	I1L1G9
GLYMA09G07120	I1L1H2
GLYMA09G07490	I1L1K3
GLYMA09G07550	K7LC70
GLYMA09G07730	K7LC81
GLYMA09G07750	I1L1M4
GLYMA09G07760	K7LC82
GLYMA09G07850	K7LC90
GLYMA09G08051	K7LC93
GLYMA09G08190	I1L1R4
GLYMA09G08370	I1L1T5
GLYMA09G08603	K7LCB7
GLYMA09G08670	I1L1V3
GLYMA09G08883	K7LCD4
GLYMA09G09213	K7LCF1
GLYMA09G09865	K7LCJ1
GLYMA09G09990	I1L218
GLYMA09G10196	K7LCK2
GLYMA09G10238	K7LCK4
GLYMA09G11570	K7LCM7
GLYMA09G11820	I1L271
GLYMA09G11883	K7LCP9
GLYMA09G12040	I1L287
GLYMA09G12198	N/A
GLYMA09G14350	K7LCU9
GLYMA09G15343	K7LCY7
GLYMA09G16020	K7LD25
GLYMA09G21860	K7LDF7
GLYMA09G23136	K7LDH9
GLYMA09G24790	K7LDN6
GLYMA09G25042	K7LDQ3
GLYMA09G26026	K7LDU5
GLYMA09G27196	K7LDZ9
GLYMA09G27390	I1L3F9
GLYMA09G28345	K7LE45
GLYMA09G28640	I1L3P5
GLYMA09G28780	I1L3Q6
GLYMA09G29890	I1L3Z1
GLYMA09G30180	I1L415
GLYMA09G30200	K7LEG1
GLYMA09G30390	C6T3D6
GLYMA09G30430	I1L439
GLYMA09G30534	K7LEH7
GLYMA09G30560	K7LEH9
GLYMA09G30621	K7LEI4
GLYMA09G30820	K7LEK2
GLYMA09G31170	I1L494
GLYMA09G31795	K7LEQ6
GLYMA09G32340	I1L4I4
GLYMA09G32460	I1L4J6
GLYMA09G32890	I1L4P1
GLYMA09G32970	K7LEW9
GLYMA09G33030	I1L4Q1
GLYMA09G33260	I1L4S6
GLYMA09G33290	I1L4S8
GLYMA09G33744	K7LF26
GLYMA09G33770	K7LF29
GLYMA09G33800	K7LF31
GLYMA09G33971	K7LF34
GLYMA09G34061	K7LF40
GLYMA09G34131	K7LF46
GLYMA09G34210	K7LF50
GLYMA09G34250	K7LF52
GLYMA09G34261	K7LF54
GLYMA09G34370	I1L535
GLYMA09G34440	I1L543
GLYMA09G34580	K7LF73
GLYMA09G34590	K7LF74
GLYMA09G34791	K7LF88
GLYMA09G37070	I1L5V5
GLYMA09G37300	K7LFR0
GLYMA09G37710	K7LFT3
GLYMA09G38020	K7LFW0
GLYMA09G38140	K7LFW3
GLYMA09G38160	K7LFW4
GLYMA09G38300	I1L672
GLYMA09G38331	K7LFX5
GLYMA09G38700	K7LFZ2
GLYMA09G38830	K7LFZ8
GLYMA09G39180	K7LG23
GLYMA09G39410	I1L6I8
GLYMA09G39570	C6TJM7
GLYMA09G39603	K7LG54
GLYMA09G39690	K7LG70
[truncated: 11 more rows]

## Sheet: G. soja_Non-syn_InDels_KEGG
Additional file 5: Functional classification of non-synonymous SNPs and InDels into diverse pathways
Gene ID	Uniprot ID	KEGG pathway (No of genes with Non-Synonymous InDels)	Uniprot ID	Gene
GLYMA10G00230	K7LGN5	gmx01100 Metabolic pathways (64)	B0ZSJ5	100170743 GPPS; geranyl-diphosphate synthase
GLYMA10G00527	K7LGP6		C6SWI3	100305752 uncharacterized LOC100305752
GLYMA10G01450	I1L7N2		I1JQM2	100306303 NADH dehydrogenase [ubiquinone] iron-sulfur protein 5-B
GLYMA10G01450	I1L7N2		C6SWU0	100499801 uncharacterized LOC100499801
GLYMA10G01571	K7LGU1		I1KNL7	100500596 probable acetyl-CoA acetyltransferase, cytosolic 2
GLYMA10G01620	K7LGU6		I1NJ56	100527041 beta-hexosaminidase 1
GLYMA10G01720	I1L7Q6		K7LT36	100775306 endochitinase PR4-like
GLYMA10G01720	I1L7Q6		F6KBT1	100775373 AOC1; allene oxide cyclase 4, chloroplastic-like
GLYMA10G02400	I1L7W4		I1KJ50	100775694 prostaglandin E synthase 2
GLYMA10G03200	I1L838		I1KM01	100776065 glycoprotein 3-alpha-L-fucosyltransferase A-like
GLYMA10G03241	K7LH22		I1N8G9	100776166 probable 2-isopropylmalate synthase
GLYMA10G03300	K7LH24		I1L9Z8	100777027 formate--tetrahydrofolate ligase-like
GLYMA10G03320	I1L850		B0M1B1	100777153 peroxisomal (S)-2-hydroxy-acid oxidase GLO1-like
GLYMA10G03530	K7LH36		I1KY49	100779280 spermidine hydroxycinnamoyl transferase-like
GLYMA10G03530	K7LH36		I1KAA1	100780485 chlorophyllide a oxygenase, chloroplastic-like
GLYMA10G03570	I1L878		K7K1Z6	100780534 chorismate mutase 3, chloroplastic
GLYMA10G03580	I1L879		I1MQL2	100783965 sucrose synthase 7-like
GLYMA10G03941	K7LH77		I1MTH5	100784845 1-deoxy-D-xylulose 5-phosphate reductoisomerase, chloroplastic-like
GLYMA10G03941	K7LH79		C6T7G0	100785541 beta-carotene 3-hydroxylase 1, chloroplastic-like
GLYMA10G03941	K7LH77		I1J6T1	100785554 chalcone synthase 6-like
GLYMA10G03941	K7LH79		I1KBS4	100785669 ferrochelatase-2, chloroplastic
GLYMA10G03941	K7LH77		I1J9H6	100785725 cysteine desulfurase, mitochondrial-like
GLYMA10G03941	K7LH79		C6TIE6	100786050 NADH dehydrogenase [ubiquinone] flavoprotein 2, mitochondrial-like
GLYMA10G03941	K7LH77		I1M3V1	100787080 photosystem II repair protein PSB27-H1, chloroplastic-like
GLYMA10G03941	K7LH79		K7KIL6	100787937 probable 1-deoxy-D-xylulose-5-phosphate synthase, chloroplastic
GLYMA10G04090	I1L8C6		I1M1F2	100789211 mannosyl-oligosaccharide 1,2-alpha-mannosidase MNS3-like
GLYMA10G04210	I1L8D5		C6T788	100790890 L-allo-threonine aldolase-like
GLYMA10G04320	I1L8E5		K7KIE3	100791095 chorismate mutase 2-like
GLYMA10G04340	I1L8E6		K7M2J5	100791323 bifunctional riboflavin kinase/FMN phosphatase-like
GLYMA10G04450	K7LHB8		K7KL77	100791811 palmitoyl-acyl carrier protein thioesterase, chloroplastic-like
GLYMA10G04530	I1L8G7		C6THA0	100792107 spermidine synthase 1-like
GLYMA10G04530	I1L8G7		I1NA38	100792493 ATP phosphoribosyltransferase 2, chloroplastic-like
GLYMA10G04890	K7LHE4		C6T9Z5	100794313 formate dehydrogenase 1, mitochondrial-like
GLYMA10G04890	K7LHE4		I1JFT4	100795276 linoleate 13S-lipoxygenase 2-1, chloroplastic
GLYMA10G05080	K7LHF0		I1LYP8	100796585 NADH dehydrogenase [ubiquinone] 1 alpha subcomplex subunit 9, mitochondrial
GLYMA10G05210	I1L8M4		I1NJ37	100796914 PLDZ; phospholipase D p1-like
GLYMA10G05280	K7LHG0		I1L3H8	100797004 glycosyltransferase family 64 protein C4
GLYMA10G05290	K7LHG1		I1LQG7	100797626 linoleate 13S-lipoxygenase 2-1, chloroplastic-like
GLYMA10G05370	I1L8N6		I1N5X2	100798144 peroxidase 31-like
GLYMA10G05430	I1L8P1		K7MEA2	100798570 protein PHYLLO, chloroplastic
GLYMA10G05920	I1L8V0		I1MWN3	100798781 probable indole-3-pyruvate monooxygenase YUCCA4
GLYMA10G06050	I1L8V9		K7LEZ7	100799481 probable 1-deoxy-D-xylulose-5-phosphate synthase 2, chloroplastic
GLYMA10G06150	I1L8X0		K7KH90	100800065 linoleate 13S-lipoxygenase 3-1, chloroplastic-like
GLYMA10G06150	I1L8X0		I1JCQ8	100800210 cytochrome P450 90B1-like
GLYMA10G06345	K7LHN1		I1KAH8	100801203 probable indole-3-pyruvate monooxygenase YUCCA11
GLYMA10G06345	K7LHN1		C6TK31	100801463 UDP-N-acetylglucosamine--dolichyl-phosphate N-acetylglucosaminephosphotransferase-like
GLYMA10G06402	K7LHN3		I1LEQ8	100802732 probable fructose-bisphosphate aldolase 3, chloroplastic
GLYMA10G06690	I1L912		I1NJ83	100806314 protoheme IX farnesyltransferase, mitochondrial-like
GLYMA10G07831	K7LHT8		K7KKZ6	100807013 tryptophan aminotransferase-related protein 2-like
GLYMA10G07935	K7LHU4		I1KJ12	100808490 chlorophyllase-1-like
GLYMA10G07935	K7LHU4		I1K9W3	100809016 phospho-2-dehydro-3-deoxyheptonate aldolase 1, chloroplastic-like
GLYMA10G08120	I1L9B4		I1JCB0	100812677 serine acetyltransferase 2-like
GLYMA10G08560	I1L9E6		I1LLU9	100813250 peroxidase 4-like
GLYMA10G09368	K7LHZ7		I1LSI2	100813623 cyanogenic beta-glucosidase-like
GLYMA10G09368	K7LHZ7		K7KCA7	100815908 lysophospholipid acyltransferase LPEAT2-like
GLYMA10G09557	K7LI06		K7LN47	100816628 probable prolyl 4-hydroxylase 9
GLYMA10G09600	I1L9J0		I1JBV5	100816737 pyruvate dehydrogenase E1 component subunit alpha-1, mitochondrial
GLYMA10G09640	I1L9J2		K7MXY9	100816974 probable S-sulfocysteine synthase, chloroplastic
GLYMA10G10130	K7LI28		I1L5P6	100817982 uncharacterized LOC100817982
GLYMA10G10167	K7LI31		I1KGR3	100820075 shikimate O-hydroxycinnamoyltransferase
GLYMA10G11557	K7LI78		K7KVP6	100820582 tryptophan aminotransferase-related protein 2-like
GLYMA10G11591	K7LI81		I1MMY2	106796344 endochitinase-like
GLYMA10G11960	K7LI96		Q9SEH8	547540 MAN1; mannosyl-oligosaccharide 1,2-alpha-mannosidase
GLYMA10G12040	K7LIA0		Q5GKZ7	548005 DAGAT1; diacylglycerol acyltransferase
GLYMA10G13840	I1L9Z8	gmx01110 Biosynthesis of secondary metabolites (44)	B0ZSJ5	100170743 GPPS; geranyl-diphosphate synthase
GLYMA10G14660	I1LA07		I1KNL7	100500596 probable acetyl-CoA acetyltransferase, cytosolic 2
GLYMA10G14660	I1LA07		F6KBT1	100775373 AOC1; allene oxide cyclase 4, chloroplastic-like
GLYMA10G15751	K7LIH9		I1JH49	100775580 glycerol-3-phosphate dehydrogenase [NAD(+)] 2, chloroplastic
GLYMA10G17020	K7LIJ8		I1K772	100776052 3-ketoacyl-CoA synthase 4-like
GLYMA10G17020	K7LIJ8		I1N8G9	100776166 probable 2-isopropylmalate synthase
GLYMA10G22710	K7LIT6		B0M1B1	100777153 peroxisomal (S)-2-hydroxy-acid oxidase GLO1-like
GLYMA10G23150	K7LIV0		I1KY49	100779280 spermidine hydroxycinnamoyl transferase-like
GLYMA10G23721	K7LIW8		I1KAA1	100780485 chlorophyllide a oxygenase, chloroplastic-like
GLYMA10G24625	K7LJ07		K7K1Z6	100780534 chorismate mutase 3, chloroplastic
GLYMA10G25956	K7LJ36		K7L2K6	100782471 (3S,6E)-nerolidol synthase 1
GLYMA10G26092	K7LJ38		K7L2K8	100783015 (3S,6E)-nerolidol synthase 1-like
GLYMA10G26206	K7LJ41		I1MTH5	100784845 1-deoxy-D-xylulose 5-phosphate reductoisomerase, chloroplastic-like
GLYMA10G26206	K7LJ41		C6T7G0	100785541 beta-carotene 3-hydroxylase 1, chloroplastic-like
GLYMA10G26250	K7LJ45		I1J6T1	100785554 chalcone synthase 6-like
GLYMA10G28091	K7LJC5		I1KBS4	100785669 ferrochelatase-2, chloroplastic
GLYMA10G28650	K7LJF7		K7KIL6	100787937 probable 1-deoxy-D-xylulose-5-phosphate synthase, chloroplastic
GLYMA10G28700	I1LB33		K7MPK4	100789842 cytochrome P450 90A1-like
GLYMA10G28710	I1LB34		I1K217	100790419 salicylic acid-binding protein 2-like
GLYMA10G29010	I1LB66		C6T788	100790890 L-allo-threonine aldolase-like
GLYMA10G29040	I1LB70		K7KIE3	100791095 chorismate mutase 2-like
GLYMA10G29040	I1LB70		K7M2J5	100791323 bifunctional riboflavin kinase/FMN phosphatase-like
GLYMA10G29110	K7LJI2		I1NA38	100792493 ATP phosphoribosyltransferase 2, chloroplastic-like
GLYMA10G29270	I1LBA4		I1JFT4	100795276 linoleate 13S-lipoxygenase 2-1, chloroplastic
GLYMA10G29300	K7LJI9		I1NJ37	100796914 PLDZ; phospholipase D p1-like
GLYMA10G29700	C6SWP5		I1LQG7	100797626 linoleate 13S-lipoxygenase 2-1, chloroplastic-like
GLYMA10G29700	I1LBD9		I1N5X2	100798144 peroxidase 31-like
GLYMA10G29700	K7LJM1		K7MEA2	100798570 protein PHYLLO, chloroplastic
GLYMA10G30040	K7LJP2		K7LEZ7	100799481 probable 1-deoxy-D-xylulose-5-phosphate synthase 2, chloroplastic
GLYMA10G30180	I1LBI7		K7KH90	100800065 linoleate 13S-lipoxygenase 3-1, chloroplastic-like
GLYMA10G30420	K7LJR9		I1JCQ8	100800210 cytochrome P450 90B1-like
GLYMA10G30420	K7LJR9		I1LEQ8	100802732 probable fructose-bisphosphate aldolase 3, chloroplastic
GLYMA10G30595	K7LJS6		I1M3J1	100805270 gibberellin 2-beta-dioxygenase 8-like
GLYMA10G30595	K7LJS6		I1NJ83	100806314 protoheme IX farnesyltransferase, mitochondrial-like
GLYMA10G30850	I1LBP9		I1KJ12	100808490 chlorophyllase-1-like
GLYMA10G30880	I1LBQ3		I1K9W3	100809016 phospho-2-dehydro-3-deoxyheptonate aldolase 1, chloroplastic-like
GLYMA10G30880	I1LBQ4		I1MS82	100812119 alpha-farnesene synthase-like
GLYMA10G30880	C6T788		I1JCB0	100812677 serine acetyltransferase 2-like
GLYMA10G31331	K7LJX3		I1LLU9	100813250 peroxidase 4-like
GLYMA10G31370	I1LBV8		I1LSI2	100813623 cyanogenic beta-glucosidase-like
GLYMA10G31370	I1LBV9		I1JBV5	100816737 pyruvate dehydrogenase E1 component subunit alpha-1, mitochondrial
GLYMA10G31370	I1LBV8		K7MXY9	100816974 probable S-sulfocysteine synthase, chloroplastic
GLYMA10G31370	I1LBV9		I1JUH8	100818754 gibberellin 3-beta-dioxygenase 1-like
GLYMA10G31370	I1LBV8		I1KGR3	100820075 shikimate O-hydroxycinnamoyltransferase
GLYMA10G31370	I1LBV9	gmx04075 Plant hormone signal transduction (16)	K7MDC5	100101881 BZIP98; transcription factor TGA6
GLYMA10G31370	I1LBV8		A4ZGU1	100101890 BZIP10; transcription factor bZIP10
GLYMA10G31370	I1LBV9		K7LZD6	100779400 auxin-responsive protein IAA11-like
GLYMA10G31530	I1LBX1		I1L8D5	100780775 ethylene-responsive transcription factor 1B-like
GLYMA10G31530	I1LBX2		I1KAC0	100786187 two-component response regulator ORR9-like
GLYMA10G31530	I1LBX1		I1KBS6	100786190 serine/threonine-protein kinase SRK2A-like
GLYMA10G31530	I1LBX2		I1KXW5	100800166 transcription factor PIF4-like
GLYMA10G31800	K7LJZ6		K7MYP4	100801682 ethylene-responsive transcription factor 1B-like
GLYMA10G31800	K7LJZ7		K7KPS2	100804180 BRASSINOSTEROID INSENSITIVE 1-associated receptor kinase 1-like
GLYMA10G31800	K7LJZ6		C6TEQ8	100804782 auxin-responsive protein IAA27-like
GLYMA10G31800	K7LJZ7		I1KLU0	100805830 mitogen-activated protein kinase homolog MMK1-like
GLYMA10G32040	I1LC16		I1J7S8	100808164 auxin-responsive protein SAUR36-like
GLYMA10G32430	I1LC56		I1JTI5	100811295 BRI1 kinase inhibitor 1-like
GLYMA10G32461	K7LK46		I1NAM6	100818567 protein ABSCISIC ACID-INSENSITIVE 5-like
GLYMA10G32610	K7LK60		I1LMC8	547719 GAI2; DELLA protein GAI 2
GLYMA10G32610	I1LC74		I1NFV7	547740 cyclin d3
GLYMA10G32610	K7LK60	gmx04141 Protein processing in endoplasmic reticulum (11)	C6SZ88	100306406 uncharacterized LOC100306406
GLYMA10G32610	I1LC74		C6SWU0	100499801 uncharacterized LOC100499801
GLYMA10G32785	K7LK72		I1KQ73	100779271 plant UBX domain-containing protein 2-like
GLYMA10G32800	I1LC91		I1M1F2	100789211 mannosyl-oligosaccharide 1,2-alpha-mannosidase MNS3-like
GLYMA10G32920	K7LK82		I1L0Y9	100789271 chaperone protein dnaJ 49-like
GLYMA10G32920	I1LCA5		I1NC86	100794435 peptide-N(4)-(N-acetyl-beta-glucosaminyl)asparagine amidase-like
GLYMA10G32920	K7LK82		I1LK05	100807536 ubiquitin fusion degradation protein 1 homolog
GLYMA10G32920	I1LCA5		C6TIN6	100809066 putative DNA repair protein RAD23-3-like
GLYMA10G33116	K7LK95		I1N055	100809457 uncharacterized LOC100809457
GLYMA10G33331	K7LKA8		I1MGM3	100820432 chaperone protein dnaJ 49-like
GLYMA10G33435	K7LKB1		Q9SEH8	547540 MAN1; mannosyl-oligosaccharide 1,2-alpha-mannosidase
GLYMA10G33870	I1LCJ5	gmx01230 Biosynthesis of amino acids (9)	I1N8G9	100776166 probable 2-isopropylmalate synthase
GLYMA10G33870	I1LCJ5		K7K1Z6	100780534 chorismate mutase 3, chloroplastic
GLYMA10G33880	K7LKD7		C6T788	100790890 L-allo-threonine aldolase-like
GLYMA10G33880	K7LKD7		K7KIE3	100791095 chorismate mutase 2-like
GLYMA10G33906	K7LKD8		I1NA38	100792493 ATP phosphoribosyltransferase 2, chloroplastic-like
GLYMA10G34030	I1LCL1		I1LEQ8	100802732 probable fructose-bisphosphate aldolase 3, chloroplastic
GLYMA10G34030	I1LCL2		I1K9W3	100809016 phospho-2-dehydro-3-deoxyheptonate aldolase 1, chloroplastic-like
GLYMA10G34030	I1LCL1		I1JCB0	100812677 serine acetyltransferase 2-like
GLYMA10G34030	I1LCL2		K7MXY9	100816974 probable S-sulfocysteine synthase, chloroplastic
GLYMA10G34360	I1LCP1	gmx04626 Plant-pathogen interaction (9)	B6EBD5	100194421 SGT1-2
GLYMA10G34360	I1LCP1		I1JX56	100783672 probable cyclic nucleotide-gated ion channel 16
GLYMA10G34810	I1LCT2		I1N0L8	100784890 disease resistance protein RPM1-like
GLYMA10G34810	I1LCT2		I1KYA7	100802130 disease resistance protein RPM1-like
GLYMA10G35120	I1LCV9		K7KPS2	100804180 BRASSINOSTEROID INSENSITIVE 1-associated receptor kinase 1-like
GLYMA10G35290	I1LCY6		I1JIW4	100819061 calcium-dependent protein kinase 34-like
GLYMA10G35290	I1LCY6		I1LD80	102666917 calcium-dependent protein kinase 4-like
GLYMA10G35340	K7LKL6		K7L684	102668045 disease resistance protein At4g27190-like
GLYMA10G35587	K7LKM6		I1L879	106794887 calmodulin-like
GLYMA10G35587	K7LKM6	gmx04016 MAPK signaling pathway - plant (9)	K7MHS5	100101886 BZIP130; transcription factor VIP1
GLYMA10G35741	K7LKP0		I1L8D5	100780775 ethylene-responsive transcription factor 1B-like
GLYMA10G35741	C6T5B7		I1K4X4	100782281 protein MKS1-like
GLYMA10G35741	K7LKP0		I1KBS6	100786190 serine/threonine-protein kinase SRK2A-like
GLYMA10G35741	C6T5B7		K7MYP4	100801682 ethylene-responsive transcription factor 1B-like
GLYMA10G35741	K7LKP0		K7KPS2	100804180 BRASSINOSTEROID INSENSITIVE 1-associated receptor kinase 1-like
GLYMA10G35741	C6T5B7		I1KLU0	100805830 mitogen-activated protein kinase homolog MMK1-like
GLYMA10G35741	K7LKP0		I1L879	106794887 calmodulin-like
GLYMA10G35741	C6T5B7		I1MMY2	106796344 endochitinase-like
GLYMA10G35741	K7LKP0	gmx03008 Ribosome biogenesis in eukaryotes (8)	I1LQ02	100775301 probable nucleolar protein 5-2
GLYMA10G35741	C6T5B7		K7MZ38	100775810 WD repeat-containing protein 3-like
GLYMA10G35741	K7LKP0		I1LHS8	100776157 nucleolar protein 6-like
GLYMA10G35741	C6T5B7		I1M0S2	100776746 uncharacterized LOC100776746
GLYMA10G35741	K7LKP0		C6TAF1	100778294 ribosomal RNA small subunit methyltransferase NEP1-like
GLYMA10G35741	C6T5B7		K7KZF1	100792757 WD repeat-containing protein 43-like
GLYMA10G35781	K7LKP5		I1ME19	100806023 U3 small nucleolar RNA-associated protein 18 homolog
GLYMA10G35910	I1LD56		I1L3P5	100813909 eukaryotic translation initiation factor 6-2
GLYMA10G36055	K7LKR7	gmx01200 Carbon metabolism (8)	I1KNL7	100500596 probable acetyl-CoA acetyltransferase, cytosolic 2
GLYMA10G36100	I1LD80		I1L9Z8	100777027 formate--tetrahydrofolate ligase-like
GLYMA10G36260	I1LD96		B0M1B1	100777153 peroxisomal (S)-2-hydroxy-acid oxidase GLO1-like
GLYMA10G36260	I1LD96		C6T9Z5	100794313 formate dehydrogenase 1, mitochondrial-like
GLYMA10G36340	K7LKS8		I1LEQ8	100802732 probable fructose-bisphosphate aldolase 3, chloroplastic
GLYMA10G36340	I1LDA6		I1JCB0	100812677 serine acetyltransferase 2-like
GLYMA10G36750	I1LDE6		I1JBV5	100816737 pyruvate dehydrogenase E1 component subunit alpha-1, mitochondrial
GLYMA10G36810	I1LDF2		K7MXY9	100816974 probable S-sulfocysteine synthase, chloroplastic
GLYMA10G36920	K7LKW4	gmx00900 Terpenoid backbone biosynthesis (6)	B0ZSJ5	100170743 GPPS; geranyl-diphosphate synthase
GLYMA10G36960	I1LDG6		I1M003	100306703 protein farnesyltransferase subunit beta
GLYMA10G37420	I1LDK7		I1KNL7	100500596 probable acetyl-CoA acetyltransferase, cytosolic 2
GLYMA10G37520	K7LKZ8		I1MTH5	100784845 1-deoxy-D-xylulose 5-phosphate reductoisomerase, chloroplastic-like
GLYMA10G37640	I1LDM9		K7KIL6	100787937 probable 1-deoxy-D-xylulose-5-phosphate synthase, chloroplastic
GLYMA10G38640	I1LDX6		K7LEZ7	100799481 probable 1-deoxy-D-xylulose-5-phosphate synthase 2, chloroplastic
GLYMA10G38640	I1LDX6	gmx00380 Tryptophan metabolism (5)	I1KNL7	100500596 probable acetyl-CoA acetyltransferase, cytosolic 2
GLYMA10G38640	I1LDX6		I1MWN3	100798781 probable indole-3-pyruvate monooxygenase YUCCA4
GLYMA10G39030	I1LE20		I1KAH8	100801203 probable indole-3-pyruvate monooxygenase YUCCA11
GLYMA10G39510	K7LLA4		K7KKZ6	100807013 tryptophan aminotransferase-related protein 2-like
GLYMA10G39521	K7LLA5		K7KVP6	100820582 tryptophan aminotransferase-related protein 2-like
GLYMA10G39660	I1LE76	gmx00940 Phenylpropanoid biosynthesis (5)	I1KY49	100779280 spermidine hydroxycinnamoyl transferase-like
GLYMA10G39920	I1LEA5		I1N5X2	100798144 peroxidase 31-like
GLYMA10G39950	K7LLD8		I1LLU9	100813250 peroxidase 4-like
GLYMA10G39950	K7LLD9		I1LSI2	100813623 cyanogenic beta-glucosidase-like
GLYMA10G39950	K7LLD8		I1KGR3	100820075 shikimate O-hydroxycinnamoyltransferase
GLYMA10G39950	K7LLD9	gmx03010 Ribosome (5)	C6SVY3	100499730 uncharacterized LOC100499730
GLYMA10G40010	I1LEA9		C6SW35	100499742 uncharacterized LOC100499742
GLYMA10G40070	I1LEB4		I1NA53	100796712 60S ribosomal protein L4-like
GLYMA10G40070	I1LEB4		C6TFG0	100810569 40S ribosomal protein S9-2
GLYMA10G40070	I1LEB4		I1JU90	100818289 60S ribosomal protein L39
GLYMA10G40090	K7LLE6	gmx03040 Spliceosome (5)	C6T5W6	100527929 sm-like protein LSM5
GLYMA10G40090	K7LLE6		I1JCD2	100800398 serine/arginine-rich splicing factor SR45a-like
GLYMA10G40381	K7LLG0		K7KW68	100801928 glycine-rich cell wall structural protein 1.8-like
GLYMA10G40381	K7LLF9		K7LBJ6	100807830 DEAD-box ATP-dependent RNA helicase 40-like
GLYMA10G40381	K7LLF8		I1JMX0	100819802 UBP1-associated protein 2A-like
GLYMA10G40381	K7LLG0	gmx04144 Endocytosis (4)	I1LUW6	100780452 probable ADP-ribosylation factor GTPase-activating protein AGD5
GLYMA10G40381	K7LLF9		I1NJ37	100796914 PLDZ; phospholipase D p1-like
GLYMA10G40381	K7LLF8		I1JHE9	100808189 clathrin heavy chain 1-like
GLYMA10G40381	K7LLG0		I1KE48	100815076 probable ADP-ribosylation factor GTPase-activating protein AGD5
GLYMA10G40381	K7LLF9	gmx03018 RNA degradation (4)	C6T5W6	100527929 sm-like protein LSM5
GLYMA10G40381	K7LLF8		I1KUU0	100778935 chaperonin CPN60-like 2, mitochondrial
GLYMA10G40450	I1LEF6		I1M8P0	100784442 polyadenylate-binding protein 2
GLYMA10G40450	K7LLG7		I1KID2	100801402 DEAD-box ATP-dependent RNA helicase 8-like
GLYMA10G40450	I1LEF6	gmx00592 alpha-Linolenic acid metabolism (4)	F6KBT1	100775373 AOC1; allene oxide cyclase 4, chloroplastic-like
GLYMA10G40450	K7LLG7		I1JFT4	100795276 linoleate 13S-lipoxygenase 2-1, chloroplastic
GLYMA10G40701	K7LLI0		I1LQG7	100797626 linoleate 13S-lipoxygenase 2-1, chloroplastic-like
GLYMA10G40701	K7LLI0		K7KH90	100800065 linoleate 13S-lipoxygenase 3-1, chloroplastic-like
GLYMA10G40870	I1LEJ7	gmx00190 Oxidative phosphorylation (4)	I1JQM2	100306303 NADH dehydrogenase [ubiquinone] iron-sulfur protein 5-B
GLYMA10G40870	K7LLI7		C6TIE6	100786050 NADH dehydrogenase [ubiquinone] flavoprotein 2, mitochondrial-like
GLYMA10G40870	K7LLI6		I1LYP8	100796585 NADH dehydrogenase [ubiquinone] 1 alpha subcomplex subunit 9, mitochondrial
GLYMA10G40870	I1LEJ7		I1NJ83	100806314 protoheme IX farnesyltransferase, mitochondrial-like
GLYMA10G40870	K7LLI7	gmx03060 Protein export (4)	C6SZ58	100306385 uncharacterized LOC100306385
GLYMA10G40870	K7LLI6		C6SWP5	100499792 uncharacterized LOC100499792
GLYMA10G40980	K7LLJ1		I1NIQ4	100807037 sec-independent protein translocase protein TATA, chloroplastic-like
GLYMA10G40980	K7LLJ1		I1N055	100809457 uncharacterized LOC100809457
GLYMA10G41170	I1LEM8	gmx00510 N-Glycan biosynthesis (4)	C6SWU0	100499801 uncharacterized LOC100499801
GLYMA10G41300	I1LEN8		I1M1F2	100789211 mannosyl-oligosaccharide 1,2-alpha-mannosidase MNS3-like
GLYMA10G41300	I1LEN8		C6TK31	100801463 UDP-N-acetylglucosamine--dolichyl-phosphate N-acetylglucosaminephosphotransferase-like
GLYMA10G41450	I1LEQ8		Q9SEH8	547540 MAN1; mannosyl-oligosaccharide 1,2-alpha-mannosidase
GLYMA10G41450	I1LEQ9	gmx00860 Porphyrin and chlorophyll metabolism (4)	I1KAA1	100780485 chlorophyllide a oxygenase, chloroplastic-like
GLYMA10G41450	I1LEQ8		I1KBS4	100785669 ferrochelatase-2, chloroplastic
GLYMA10G41450	I1LEQ9		I1NJ83	100806314 protoheme IX farnesyltransferase, mitochondrial-like
GLYMA10G41573	K7LLQ0		I1KJ12	100808490 chlorophyllase-1-like
GLYMA10G41661	K7LLQ1	gmx03015 mRNA surveillance pathway (3)	I1M8P0	100784442 polyadenylate-binding protein 2
GLYMA10G41740	I1LET8		K7LVE4	100806136 cleavage and polyadenylation specificity factor subunit 3-I
GLYMA10G41740	K7LLQ6		I1MLV4	100814231 WD repeat-containing protein 82-like
GLYMA10G41740	I1LET8	gmx00270 Cysteine and methionine metabolism (3)	C6THA0	100792107 spermidine synthase 1-like
GLYMA10G41740	K7LLQ6		I1JCB0	100812677 serine acetyltransferase 2-like
GLYMA10G41990	I1LEW1		K7MXY9	100816974 probable S-sulfocysteine synthase, chloroplastic
GLYMA10G42171	K7LLT5	gmx03013 RNA transport (3)	I1M0S2	100776746 uncharacterized LOC100776746
GLYMA10G42310	I1LEY9		I1M8P0	100784442 polyadenylate-binding protein 2
GLYMA10G42420	K7LLU9		I1LHI3	100805204 nuclear pore complex protein NUP58-like
GLYMA10G42560	I1LF15	gmx00970 Aminoacyl-tRNA biosynthesis (3)	I1NAJ0	100784904 threonine--tRNA ligase, chloroplastic/mitochondrial 2
GLYMA10G42660	I1LF27		I1K0Q4	100801732 asparagine--tRNA ligase, chloroplastic/mitochondrial
GLYMA10G42740	I1LF37		I1JC08	100802879 threonine--tRNA ligase, mitochondrial 1-like
GLYMA10G42740	I1LF37	gmx00730 Thiamine metabolism (3)	I1J9H6	100785725 cysteine desulfurase, mitochondrial-like
GLYMA10G42740	I1LF37		K7KIL6	100787937 probable 1-deoxy-D-xylulose-5-phosphate synthase, chloroplastic
GLYMA10G42740	I1LF37		K7LEZ7	100799481 probable 1-deoxy-D-xylulose-5-phosphate synthase 2, chloroplastic
GLYMA10G42740	I1LF37	gmx00620 Pyruvate metabolism (3)	I1KNL7	100500596 probable acetyl-CoA acetyltransferase, cytosolic 2
GLYMA10G42740	I1LF37		I1N8G9	100776166 probable 2-isopropylmalate synthase
GLYMA10G42740	I1LF37		I1JBV5	100816737 pyruvate dehydrogenase E1 component subunit alpha-1, mitochondrial
GLYMA10G42740	I1LF37	gmx00052 Galactose metabolism (3)	B2ZF65	100790775 galactinol--sucrose galactosyltransferase
GLYMA10G43020	I1LF70		K7LBA9	100819413 probable galactinol--sucrose galactosyltransferase 2
GLYMA10G43020	I1LF69		K7MVP9	102661857 galactinol--sucrose galactosyltransferase-like
GLYMA10G43020	K7LLZ1	gmx00195 Photosynthesis (3)	C6SWI3	100305752 uncharacterized LOC100305752
GLYMA10G43120	I1LF80		I1MVE7	100782906 ferredoxin-2-like
GLYMA10G43120	I1LF81		I1M3V1	100787080 photosystem II repair protein PSB27-H1, chloroplastic-like
GLYMA10G43120	I1LF79	gmx00564 Glycerophospholipid metabolism (3)	I1JH49	100775580 glycerol-3-phosphate dehydrogenase [NAD(+)] 2, chloroplastic
GLYMA10G43120	I1LF80		I1NJ37	100796914 PLDZ; phospholipase D p1-like
GLYMA10G43120	I1LF81		K7KCA7	100815908 lysophospholipid acyltransferase LPEAT2-like
GLYMA10G43120	I1LF79	gmx00480 Glutathione metabolism (3)	I1KP94	100306295 probable phospholipid hydroperoxide glutathione peroxidase
GLYMA10G43120	I1LF80		C6THA0	100792107 spermidine synthase 1-like
GLYMA10G43120	I1LF81		Q43758	553156 APX1; ascorbate peroxidase 1, cytosolic
GLYMA10G43120	I1LF79	gmx00520 Amino sugar and nucleotide sugar metabolism (3)	I1NJ56	100527041 beta-hexosaminidase 1
GLYMA10G43120	I1LF80		K7LT36	100775306 endochitinase PR4-like
GLYMA10G43120	I1LF81		I1MMY2	106796344 endochitinase-like
GLYMA10G43120	I1LF79	gmx00400 Phenylalanine, tyrosine and tryptophan biosynthesis (3)	K7K1Z6	100780534 chorismate mutase 3, chloroplastic
GLYMA10G43120	I1LF80		K7KIE3	100791095 chorismate mutase 2-like
GLYMA10G43120	I1LF81		I1K9W3	100809016 phospho-2-dehydro-3-deoxyheptonate aldolase 1, chloroplastic-like
GLYMA10G43120	I1LF79	gmx00941 Flavonoid biosynthesis (3)	I1KY49	100779280 spermidine hydroxycinnamoyl transferase-like
GLYMA10G43120	I1LF80		I1J6T1	100785554 chalcone synthase 6-like
GLYMA10G43120	I1LF81		I1KGR3	100820075 shikimate O-hydroxycinnamoyltransferase
GLYMA10G43120	I1LF79	gmx04146 Peroxisome (3)	B0M1B1	100777153 peroxisomal (S)-2-hydroxy-acid oxidase GLO1-like
GLYMA10G43131	K7LLZ8		I1LTU2	100805776 fatty acyl-CoA reductase 3
GLYMA10G43190	I1LF87		I1NG15	100816797 PXMP2/4 family protein 4-like
GLYMA10G43720	K7LM28	gmx00591 Linoleic acid metabolism (3)	I1JFT4	100795276 linoleate 13S-lipoxygenase 2-1, chloroplastic
GLYMA10G43720	I1LFD5		I1LQG7	100797626 linoleate 13S-lipoxygenase 2-1, chloroplastic-like
GLYMA10G43720	K7LM28		K7KH90	100800065 linoleate 13S-lipoxygenase 3-1, chloroplastic-like
GLYMA10G43720	I1LFD5	gmx00630 Glyoxylate and dicarboxylate metabolism (3)	I1KNL7	100500596 probable acetyl-CoA acetyltransferase, cytosolic 2
GLYMA10G43880	K7LM32		B0M1B1	100777153 peroxisomal (S)-2-hydroxy-acid oxidase GLO1-like
GLYMA11G00300	I1LFN9		C6T9Z5	100794313 formate dehydrogenase 1, mitochondrial-like
GLYMA11G00300	C6SYE2	gmx00500 Starch and sucrose metabolism (3)	I1MQL2	100783965 sucrose synthase 7-like
GLYMA11G00650	I1LFS6		I1LGW4	100784912 beta-amylase 3, chloroplastic
GLYMA11G01501	K7LMH8		I1LSI2	100813623 cyanogenic beta-glucosidase-like
GLYMA11G01501	K7LMH8	gmx00590 Arachidonic acid metabolism (2)	I1KP94	100306295 probable phospholipid hydroperoxide glutathione peroxidase
GLYMA11G01595	K7LMI3		I1KJ50	100775694 prostaglandin E synthase 2
GLYMA11G01595	K7N4T7	gmx03030 DNA replication (2)	K7LF83	100778597 replication protein A 70 kDa DNA-binding subunit A-like
GLYMA11G01595	K7LMI3		I1LJ93	100782586 DNA replication licensing factor MCM4-like
GLYMA11G01595	K7N4T7	gmx04712 Circadian rhythm - plant (2)	I1J6T1	100785554 chalcone synthase 6-like
GLYMA11G01721	K7LMI7		I1KQC3	100812253 FKF; adagio protein 3-like
GLYMA11G02410	I1LGD8	gmx00511 Other glycan degradation (2)	I1NJ56	100527041 beta-hexosaminidase 1
GLYMA11G02410	I1LGD7		I1MYZ6	100804658 cytosolic endo-beta-N-acetylglucosaminidase 1-like
GLYMA11G02410	I1LGD6	gmx01212 Fatty acid metabolism (2)	I1KNL7	100500596 probable acetyl-CoA acetyltransferase, cytosolic 2
GLYMA11G02410	I1LGD8		K7KL77	100791811 palmitoyl-acyl carrier protein thioesterase, chloroplastic-like
GLYMA11G02410	I1LGD7	gmx00904 Diterpenoid biosynthesis (2)	I1M3J1	100805270 gibberellin 2-beta-dioxygenase 8-like
GLYMA11G02410	I1LGD6		I1JUH8	100818754 gibberellin 3-beta-dioxygenase 1-like
GLYMA11G02420	I1LGD9	gmx03430 Mismatch repair (2)	K7LF83	100778597 replication protein A 70 kDa DNA-binding subunit A-like
GLYMA11G02760	K7LMQ3		K7N3P1	100789883 DNA mismatch repair protein MSH3
GLYMA11G02760	K7LMQ3	gmx00310 Lysine degradation (2)	I1KNL7	100500596 probable acetyl-CoA acetyltransferase, cytosolic 2
GLYMA11G02970	I1LGI8		K7KWM0	100791481 histone-lysine N-methyltransferase ASHR3
GLYMA11G03090	I1LGK0	gmx00910 Nitrogen metabolism (2)	I1N5Q1	100781868 carbonic anhydrase, chloroplastic
GLYMA11G03130	I1LGK4		I1MAM5	100818642 nitrate reductase [NADH] 2
GLYMA11G03130	I1LGK4	gmx04120 Ubiquitin mediated proteolysis (2)	I1LMG8	100785428 anaphase-promoting complex subunit 2-like
GLYMA11G03200	K7LMR7		I1KMM0	100789933 E3 ubiquitin-protein ligase UPL6-like
GLYMA11G03200	I1LGK9	gmx00945 Stilbenoid, diarylheptanoid and gingerol biosynthesis (2)	I1KY49	100779280 spermidine hydroxycinnamoyl transferase-like
GLYMA11G03200	K7LMR7		I1KGR3	100820075 shikimate O-hydroxycinnamoyltransferase
GLYMA11G03200	I1LGK9	gmx00920 Sulfur metabolism (2)	I1JCB0	100812677 serine acetyltransferase 2-like
GLYMA11G03441	K7LMS6		K7MXY9	100816974 probable S-sulfocysteine synthase, chloroplastic
GLYMA11G03790	I1LGS4	gmx00902 Monoterpenoid biosynthesis (2)	K7L2K6	100782471 (3S,6E)-nerolidol synthase 1
GLYMA11G03835	K7LMW1		K7L2K8	100783015 (3S,6E)-nerolidol synthase 1-like
GLYMA11G03861	K7LMW2	gmx00030 Pentose phosphate pathway (2)	I1MIW3	100801418 ribokinase-like
GLYMA11G03981	K7LMW9		I1LEQ8	100802732 probable fructose-bisphosphate aldolase 3, chloroplastic
GLYMA11G04210	I1LGW4	gmx00565 Ether lipid metabolism (2)	I1NJ37	100796914 PLDZ; phospholipase D p1-like
GLYMA11G04350	I1LGX5		K7KCA7	100815908 lysophospholipid acyltransferase LPEAT2-like
GLYMA11G04740	K7LN11	gmx00010 Glycolysis / Gluconeogenesis (2)	I1LEQ8	100802732 probable fructose-bisphosphate aldolase 3, chloroplastic
GLYMA11G04787	K7LN14		I1JBV5	100816737 pyruvate dehydrogenase E1 component subunit alpha-1, mitochondrial
GLYMA11G04787	K7LN14	gmx00330 Arginine and proline metabolism (2)	C6THA0	100792107 spermidine synthase 1-like
GLYMA11G05380	K7LN47		K7LN47	100816628 probable prolyl 4-hydroxylase 9
GLYMA11G05560	K7LN60	gmx03440 Homologous recombination (2)	K7LF83	100778597 replication protein A 70 kDa DNA-binding subunit A-like
GLYMA11G05620	I1LHA9		K7LAJ5	100806733 SNF2 domain-containing protein CLASSY 3-like
GLYMA11G05620	I1LHA9	gmx03420 Nucleotide excision repair (2)	K7LF83	100778597 replication protein A 70 kDa DNA-binding subunit A-like
GLYMA11G05720	I1LHC4		C6TIN6	100809066 putative DNA repair protein RAD23-3-like
GLYMA11G06020	K7LN78	gmx00905 Brassinosteroid biosynthesis (2)	K7MPK4	100789842 cytochrome P450 90A1-like
GLYMA11G06270	K7LN97		I1JCQ8	100800210 cytochrome P450 90B1-like
GLYMA11G06270	K7LN97	gmx04070 Phosphatidylinositol signaling system (1)	I1L879	106794887 calmodulin-like
GLYMA11G06350	I1LHI3	gmx00240 Pyrimidine metabolism (1)	I1L5P6	100817982 uncharacterized LOC100817982
GLYMA11G06350	K7LNA0	gmx00051 Fructose and mannose metabolism (1)	I1LEQ8	100802732 probable fructose-bisphosphate aldolase 3, chloroplastic
GLYMA11G06350	I1LHI3	gmx00020 Citrate cycle (TCA cycle) (1)	I1JBV5	100816737 pyruvate dehydrogenase E1 component subunit alpha-1, mitochondrial
GLYMA11G06350	K7LNA0	gmx00230 Purine metabolism (1)	I1L5P6	100817982 uncharacterized LOC100817982
GLYMA11G06711	K7LNC6	gmx00670 One carbon pool by folate (1)	I1L9Z8	100777027 formate--tetrahydrofolate ligase-like
GLYMA11G06770	K7LNC9	gmx00603 Glycosphingolipid biosynthesis - globo and isoglobo series (1)	I1NJ56	100527041 beta-hexosaminidase 1
GLYMA11G06770	I1LHM1	gmx00040 Pentose and glucuronate interconversions (1)	I1MYL5	100782388 probable pectate lyase 5
GLYMA11G06911	K7LND7	gmx00710 Carbon fixation in photosynthetic organisms (1)	I1LEQ8	100802732 probable fructose-bisphosphate aldolase 3, chloroplastic
GLYMA11G06990	I1LHP1	gmx00531 Glycosaminoglycan degradation (1)	I1NJ56	100527041 beta-hexosaminidase 1
GLYMA11G07000	I1LHP3	gmx00901 Indole alkaloid biosynthesis (1)	I1K217	100790419 salicylic acid-binding protein 2-like
GLYMA11G07000	I1LHP2	gmx00604 Glycosphingolipid biosynthesis - ganglio series (1)	I1NJ56	100527041 beta-hexosaminidase 1
GLYMA11G07020	I1LHP6	gmx00740 Riboflavin metabolism (1)	K7M2J5	100791323 bifunctional riboflavin kinase/FMN phosphatase-like
GLYMA11G07020	I1LHP6	gmx00410 beta-Alanine metabolism (1)	C6THA0	100792107 spermidine synthase 1-like
GLYMA11G07040	I1LHP8	gmx04122 Sulfur relay system (1)	I1J9H6	100785725 cysteine desulfurase, mitochondrial-like
GLYMA11G07040	I1LHP8	gmx00640 Propanoate metabolism (1)	I1KNL7	100500596 probable acetyl-CoA acetyltransferase, cytosolic 2
GLYMA11G07050	I1LHP9	gmx01210 2-Oxocarboxylic acid metabolism (1)	I1N8G9	100776166 probable 2-isopropylmalate synthase
GLYMA11G07340	I1LHS8	gmx00561 Glycerolipid metabolism (1)	Q5GKZ7	548005 DAGAT1; diacylglycerol acyltransferase
GLYMA11G08131	K7LNK0	gmx00909 Sesquiterpenoid and triterpenoid biosynthesis (1)	I1MS82	100812119 alpha-farnesene synthase-like
GLYMA11G08730	K7LNM8	gmx00061 Fatty acid biosynthesis (1)	K7KL77	100791811 palmitoyl-acyl carrier protein thioesterase, chloroplastic-like
GLYMA11G08940	I1LI95	gmx00340 Histidine metabolism (1)	I1NA38	100792493 ATP phosphoribosyltransferase 2, chloroplastic-like
GLYMA11G09011	K7LNN6	gmx04136 Autophagy - other (1)	K7M7X6	100818104 autophagy-related protein 13-like
GLYMA11G09040	I1LIA2	gmx00906 Carotenoid biosynthesis (1)	C6T7G0	100785541 beta-carotene 3-hydroxylase 1, chloroplastic-like
GLYMA11G09080	I1LIA6	gmx00072 Synthesis and degradation of ketone bodies (1)	I1KNL7	100500596 probable acetyl-CoA acetyltransferase, cytosolic 2
GLYMA11G09080	I1LIA6	gmx00062 Fatty acid elongation (1)	I1K772	100776052 3-ketoacyl-CoA synthase 4-like
GLYMA11G09411	K7LNR3	gmx00073 Cutin, suberine and wax biosynthesis (1)	I1LTU2	100805776 fatty acyl-CoA reductase 3
GLYMA11G09500	K7LNR9	gmx00071 Fatty acid degradation (1)	I1KNL7	100500596 probable acetyl-CoA acetyltransferase, cytosolic 2
GLYMA11G09761	K7LNS8	gmx03020 RNA polymerase (1)	I1L5P6	100817982 uncharacterized LOC100817982
GLYMA11G09825	K7LNS9	gmx00053 Ascorbate and aldarate metabolism (1)	Q43758	553156 APX1; ascorbate peroxidase 1, cytosolic
GLYMA11G09825	K7LNS9	gmx00280 Valine, leucine and isoleucine degradation (1)	I1KNL7	100500596 probable acetyl-CoA acetyltransferase, cytosolic 2
GLYMA11G09840	I1LIJ1	gmx00290 Valine, leucine and isoleucine biosynthesis (1)	I1N8G9	100776166 probable 2-isopropylmalate synthase
GLYMA11G09850	K7LNT0	gmx04130 SNARE interactions in vesicular transport (1)	I1N120	100780765 membrin-11-like
GLYMA11G09940	K7LNT2	gmx00260 Glycine, serine and threonine metabolism (1)	C6T788	100790890 L-allo-threonine aldolase-like
GLYMA11G09950	K7LNT3	gmx00650 Butanoate metabolism (1)	I1KNL7	100500596 probable acetyl-CoA acetyltransferase, cytosolic 2
GLYMA11G09950	I1LIK2	gmx00460 Cyanoamino acid metabolism (1)	I1LSI2	100813623 cyanogenic beta-glucosidase-like
GLYMA11G09950	K7LNT5	gmx00130 Ubiquinone and other terpenoid-quinone biosynthesis (1)	K7MEA2	100798570 protein PHYLLO, chloroplastic
GLYMA11G09950	K7LNT4
GLYMA11G09950	K7LNT3
GLYMA11G09950	I1LIK2
GLYMA11G09950	K7LNT5
GLYMA11G09950	K7LNT4
GLYMA11G09950	K7LNT3
GLYMA11G09950	I1LIK2
GLYMA11G09950	K7LNT5
GLYMA11G09950	K7LNT4
GLYMA11G09950	K7LNT3
GLYMA11G09950	I1LIK2
GLYMA11G09950	K7LNT5
GLYMA11G09950	K7LNT4
GLYMA11G10281	K7LNV5
GLYMA11G10281	K7LNV4
GLYMA11G10520	C6TAF1
GLYMA11G10520	C6TAF1
GLYMA11G11190	K7LP19
GLYMA11G11190	K7LP19
GLYMA11G11200	I1LIX9
GLYMA11G11336	K7LP26
GLYMA11G11336	K7LP25
GLYMA11G11336	K7LP26
GLYMA11G11336	K7LP25
GLYMA11G11610	I1LJ31
GLYMA11G11610	I1LJ32
GLYMA11G11610	I1LJ31
GLYMA11G11610	I1LJ32
GLYMA11G11700	I1LJ44
GLYMA11G11720	I1LJ47
GLYMA11G11791	K7LP48
GLYMA11G11813	K7LP50
GLYMA11G12060	N/A
GLYMA11G12070	I1LJ88
GLYMA11G12110	I1LJ93
GLYMA11G12436	K7LP92
GLYMA11G12436	K7LP92
GLYMA11G12443	K7LP94
GLYMA11G12670	I1LJF4
GLYMA11G12800	I1LJG5
GLYMA11G12800	I1LJG4
GLYMA11G12800	I1LJG5
GLYMA11G12800	I1LJG4
GLYMA11G13040	I1LJJ0
GLYMA11G13060	I1LJJ3
GLYMA11G13060	I1LJJ2
GLYMA11G13060	I1LJJ3
GLYMA11G13060	I1LJJ2
GLYMA11G13111	K7LPC2
GLYMA11G13111	K7LPC2
GLYMA11G13400	K7LPE6
GLYMA11G13791	K7LPH9
GLYMA11G14050	I1LJV0
GLYMA11G14050	I1LJU7
GLYMA11G14050	I1LJV0
GLYMA11G14050	I1LJU7
GLYMA11G14050	I1LJV0
GLYMA11G14050	I1LJU7
GLYMA11G14050	I1LJV0
GLYMA11G14050	I1LJU7
GLYMA11G14070	I1LJV1
GLYMA11G14070	I1LJV1
GLYMA11G14340	I1LJX6
GLYMA11G14660	I1LK05
GLYMA11G14920	K7LPP4
GLYMA11G15460	I1LK84
GLYMA11G15580	I1LK99
GLYMA11G15580	K7LPT2
GLYMA11G15580	K7LPT7
GLYMA11G15580	K7LPT6
GLYMA11G15580	I1LK99
GLYMA11G15580	K7LPT2
GLYMA11G15580	K7LPT7
GLYMA11G15580	K7LPT6
GLYMA11G15580	I1LK99
GLYMA11G15580	K7LPT2
GLYMA11G15580	K7LPT7
GLYMA11G15580	K7LPT6
GLYMA11G15580	I1LK99
GLYMA11G15580	K7LPT2
GLYMA11G15580	K7LPT7
GLYMA11G15580	K7LPT6
GLYMA11G15680	I1LKA7
GLYMA11G15680	I1LKA8
GLYMA11G15680	Q43758
GLYMA11G15720	I1LKB6
GLYMA11G15841	K7LPV5
GLYMA11G15841	K7LPV5
GLYMA11G15860	I1LKD2
GLYMA11G15950	K7LPW5
GLYMA11G18160	I1LKL7
GLYMA11G18160	I1LKL7
GLYMA11G18390	K7LQ42
GLYMA11G18420	I1LKN3
GLYMA11G18455	K7LQ45
GLYMA11G18700	I1LKP1
GLYMA11G19080	I1LKS8
GLYMA11G19570	K7LQ90
GLYMA11G19650	K7LQ94
GLYMA11G19910	I1LL03
GLYMA11G20240	K7LQD5
GLYMA11G20240	K7LQD5
GLYMA11G20240	K7LQD5
GLYMA11G20500	I1LL51
GLYMA11G20580	K7LQG1
GLYMA11G20910	K7LQH8
GLYMA11G21061	K7LQI3
GLYMA11G21190	I1LLA1
GLYMA11G21190	I1LLA2
GLYMA11G21190	I1LLA3
GLYMA11G21340	K7LQJ8
GLYMA11G21472	K7LQK6
GLYMA11G21472	K7LQK6
GLYMA11G21472	K7LQK6
GLYMA11G21670	I1LLD8
GLYMA11G21670	I1LLD8
GLYMA11G21670	I1LLD8
GLYMA11G21700	K7LQM7
GLYMA11G21700	K7LQM5
GLYMA11G21700	K7LQM7
GLYMA11G21700	K7LQM5
GLYMA11G21700	K7LQM7
GLYMA11G21700	K7LQM5
GLYMA11G23516	K7LQP5
GLYMA11G25540	I1LLG1
GLYMA11G25860	K7LQR4
GLYMA11G25860	I1LLH2
GLYMA11G25950	I1LLH5
GLYMA11G27070	K7LQT6
GLYMA11G27070	K7LQT6
GLYMA11G29440	I1LLR9
GLYMA11G29760	I1LLT9
GLYMA11G29900	K7LR22
GLYMA11G29950	K7LR24
GLYMA11G30010	I1LLU9
GLYMA11G30060	K7LR28
GLYMA11G30080	C6SXN3
GLYMA11G30080	C6SXN3
GLYMA11G31180	K7LR52
GLYMA11G31310	I1LLY4
GLYMA11G31310	I1LLY3
GLYMA11G31310	I1LLY4
GLYMA11G31310	I1LLY3
GLYMA11G31367	K7LR62
GLYMA11G31367	K7LR62
GLYMA11G31673	K7LR82
GLYMA11G31721	K7LR84
GLYMA11G32610	I1LM53
GLYMA11G33050	K7LRF4
GLYMA11G33251	K7LRG3
GLYMA11G33690	I1LMC4
GLYMA11G33720	I1LMC8
GLYMA11G33831	K7LRI7
GLYMA11G34170	I1LMG8
GLYMA11G34250	I1LMH6
GLYMA11G34490	C6ZRT3
GLYMA11G34500	I1LMJ6
GLYMA11G34500	I1LMJ6
GLYMA11G34590	K7LRM4
GLYMA11G34710	I1LML4
GLYMA11G34710	I1LML4
GLYMA11G34970	I1LMP1
GLYMA11G35090	I1LMQ1
GLYMA11G35290	K7LRQ9
GLYMA11G35362	K7LRR3
GLYMA11G35362	K7LRR3
GLYMA11G35880	I1LMX3
GLYMA11G36440	I1LN14
GLYMA11G36440	I1LN13
GLYMA11G36440	I1LN14
GLYMA11G36440	I1LN13
GLYMA11G36860	N/A
GLYMA11G36930	K7LRY7
GLYMA11G37390	K7LS14
GLYMA11G37390	K7LS13
GLYMA11G37390	K7LS14
GLYMA11G37390	K7LS13
GLYMA11G37680	K7LS28
GLYMA11G37680	K7LS28
GLYMA11G37680	K7LS28
GLYMA11G38110	K7LS58
GLYMA11G38110	I1LNK6
GLYMA11G38110	K7LS58
GLYMA11G38110	I1LNK6
GLYMA11G38110	K7LS58
GLYMA11G38110	I1LNK6
GLYMA11G38110	K7LS58
GLYMA11G38110	I1LNK6
GLYMA11G38180	I1LNL4
GLYMA12G00570	I1LNQ5
GLYMA12G00690	I1LNR7
GLYMA12G00690	I1LNR7
GLYMA12G01020	I1LNV9
GLYMA12G01420	I1LP02
GLYMA12G01420	I1LP02
GLYMA12G01490	K7LSE4
GLYMA12G01490	K7LSE4
GLYMA12G01570	I1LP19
GLYMA12G01570	I1LP20
GLYMA12G02000	I1LP72
GLYMA12G02030	K7LSH8
GLYMA12G02670	I1LPG2
GLYMA12G02890	K7LSP5
GLYMA12G02890	I1LPI5
GLYMA12G02890	K7LSP5
GLYMA12G02890	I1LPI5
GLYMA12G03170	I1LPK6
GLYMA12G04050	K7LSV7
GLYMA12G04050	I1LPW5
GLYMA12G04050	K7LSV7
GLYMA12G04050	I1LPW5
GLYMA12G04050	K7LSV7
GLYMA12G04050	I1LPW5
GLYMA12G04110	I1LPX2
GLYMA12G04228	K7LSW7
GLYMA12G04244	K7LSW9
GLYMA12G04376	K7LSX4
GLYMA12G04400	I1LQ02
GLYMA12G04400	I1LQ03
GLYMA12G04466	K7LSY3
GLYMA12G04466	K7LSY3
GLYMA12G04670	I1LQ29
GLYMA12G04670	I1LQ31
GLYMA12G04670	I1LQ32
GLYMA12G04670	I1LQ33
GLYMA12G04670	I1LQ29
GLYMA12G04670	I1LQ31
GLYMA12G04670	I1LQ32
GLYMA12G04670	I1LQ33
GLYMA12G04670	I1LQ29
GLYMA12G04670	I1LQ31
GLYMA12G04670	I1LQ32
GLYMA12G04670	I1LQ33
GLYMA12G04670	I1LQ29
GLYMA12G04670	I1LQ31
GLYMA12G04670	I1LQ32
GLYMA12G04670	I1LQ33
GLYMA12G04800	K7LSZ8
GLYMA12G04800	I1LQ44
GLYMA12G04835	K7LSZ9
GLYMA12G04835	K7LSZ9
GLYMA12G05172	K7LT24
GLYMA12G05172	K7LT24
GLYMA12G05301	K7LT36
GLYMA12G05301	K7LT36
GLYMA12G05520	K7LT54
GLYMA12G05530	I1LQD2
GLYMA12G05650	K7LT63
GLYMA12G05840	I1LQG7
GLYMA12G05856	K7LT78
GLYMA12G06180	N/A
GLYMA12G06420	K7LTA5
GLYMA12G06580	K7LTB1
GLYMA12G06606	K7LTB3
GLYMA12G07270	I1LQV7
GLYMA12G07290	I1LQV9
GLYMA12G07290	I1LQW0
GLYMA12G07290	I1LQV9
GLYMA12G07290	I1LQW0
GLYMA12G07350	I1LQW9
GLYMA12G07361	K7LTF2
GLYMA12G07420	I1LQX5
GLYMA12G07420	I1LQX5
GLYMA12G07590	I1LQZ0
GLYMA12G07590	K7LTG6
GLYMA12G07590	I1LQZ0
GLYMA12G07590	K7LTG6
GLYMA12G07830	K7LTI5
GLYMA12G07926	K7LTJ5
GLYMA12G08270	K7LTM0
GLYMA12G08270	K7LTM0
GLYMA12G08860	I1LRB1
GLYMA12G08860	K7LTQ8
GLYMA12G08950	K7LTR1
GLYMA12G09030	K7LTR6
GLYMA12G09060	I1LRC7
GLYMA12G09060	I1LRC7
GLYMA12G09140	K7LTS0
GLYMA12G09140	K7LTS0
GLYMA12G09330	K7LTS5
GLYMA12G09501	K7LTT9
GLYMA12G09501	K7LTT9
GLYMA12G09586	K7LTU8
GLYMA12G09586	K7LTU8
GLYMA12G09660	I1LRI2
GLYMA12G09670	I1LRI3
GLYMA12G10040	K7LTX3
GLYMA12G10040	K7LTX3
GLYMA12G10070	I1LRL6
GLYMA12G10260	K7LTY2
GLYMA12G10620	K7LTZ3
GLYMA12G10650	K7LTZ6
GLYMA12G10650	K7LTZ4
GLYMA12G10650	K7LTZ6
GLYMA12G10650	K7LTZ4
GLYMA12G10650	K7LTZ6
GLYMA12G10650	K7LTZ4
GLYMA12G11110	K7LU13
GLYMA12G11110	I1LRU1
GLYMA12G11110	K7LU13
GLYMA12G11110	I1LRU1
GLYMA12G11110	K7LU13
GLYMA12G11110	I1LRU1
GLYMA12G11110	K7LU13
GLYMA12G11110	I1LRU1
GLYMA12G11850	I1LRY8
GLYMA12G11850	I1LRY8
GLYMA12G11850	I1LRY8
GLYMA12G12230	I1LS00
GLYMA12G12496	K7LU72
GLYMA12G12740	I1LS25
GLYMA12G12740	I1LS24
GLYMA12G12740	I1LS25
GLYMA12G12740	I1LS24
GLYMA12G12870	I1LS37
GLYMA12G12870	I1LS37
GLYMA12G12975	K7LU91
GLYMA12G12990	K7LU92
GLYMA12G13180	I1LS51
GLYMA12G13270	I1LS58
GLYMA12G13270	I1LS59
GLYMA12G13270	I1LS58
GLYMA12G13270	I1LS59
GLYMA12G13280	I1LS60
GLYMA12G13300	I1LS62
GLYMA12G13315	K7LUA1
GLYMA12G13380	K7LUA5
GLYMA12G13380	K7LUA5
GLYMA12G14200	I1LSA4
GLYMA12G14442	K7LUD8
GLYMA12G15410	K7LUH5
GLYMA12G15620	I1LSI2
GLYMA12G15725	K7LUI2
GLYMA12G15750	K7LUI3
GLYMA12G15850	K7LUI7
GLYMA12G15850	K7LUI7
GLYMA12G15850	K7LUI7
GLYMA12G15860	K7LUI8
GLYMA12G16252	K7LUK3
GLYMA12G16291	K7LUK4
GLYMA12G16291	K7LUK4
GLYMA12G16606	K7LUM7
GLYMA12G16606	K7LUM7
GLYMA12G16623	K7LUM8
GLYMA12G17251	K7LUQ9
GLYMA12G17450	I1LSR9
GLYMA12G21135	K7LUX7
GLYMA12G22160	I1LSY9
GLYMA12G22230	I1LSZ1
GLYMA12G22321	K7LUY9
GLYMA12G22321	K7LUY9
GLYMA12G23331	K7LV16
GLYMA12G23331	K7LV16
GLYMA12G23331	K7LV16
GLYMA12G23331	K7LV16
GLYMA12G23331	K7LV16
GLYMA12G23331	K7LV16
GLYMA12G28832	K7LVC9
GLYMA12G28832	K7LVD1
GLYMA12G28832	K7LVD0
GLYMA12G28832	K7LVC9
GLYMA12G28832	K7LVD1
GLYMA12G28832	K7LVD0
GLYMA12G28890	I1LTD2
GLYMA12G28910	I1LTD6
GLYMA12G28910	I1LTD5
GLYMA12G28910	I1LTD6
GLYMA12G28910	I1LTD5
GLYMA12G29031	K7LVE4
GLYMA12G29060	I1LTF0
GLYMA12G29060	I1LTF0
GLYMA12G29370	K7LVG2
GLYMA12G29471	K7LVG6
GLYMA12G29520	I1LTI1
GLYMA12G30510	K7LVN1
GLYMA12G30561	K7LVN4
GLYMA12G30561	K7LVN5
GLYMA12G30561	K7LVN6
GLYMA12G30561	K7LVN4
GLYMA12G30561	K7LVN5
GLYMA12G30561	K7LVN6
GLYMA12G30561	K7LVN4
GLYMA12G30561	K7LVN5
GLYMA12G30561	K7LVN6
GLYMA12G30630	I1LTR6
GLYMA12G30870	I1LTU2
GLYMA12G31060	I1LTW2
GLYMA12G31060	I1LTW2
GLYMA12G31080	K7LVS1
GLYMA12G31880	K7LVV7
GLYMA12G32070	I1LU66
GLYMA12G32070	I1LU65
GLYMA12G32111	K7LVX3
GLYMA12G32111	K7LVX0
GLYMA12G32111	K7LVX1
GLYMA12G32111	K7LVX3
GLYMA12G32111	K7LVX0
GLYMA12G32111	K7LVX1
GLYMA12G32111	K7LVX3
GLYMA12G32111	K7LVX0
GLYMA12G32111	K7LVX1
GLYMA12G32111	K7LVX3
GLYMA12G32111	K7LVX0
GLYMA12G32111	K7LVX1
GLYMA12G32111	K7LVX3
GLYMA12G32111	K7LVX0
GLYMA12G32111	K7LVX1
GLYMA12G32111	K7LVX3
GLYMA12G32111	K7LVX0
GLYMA12G32111	K7LVX1
GLYMA12G32111	K7LVX3
GLYMA12G32111	K7LVX0
GLYMA12G32111	K7LVX1
GLYMA12G32111	K7LVX3
GLYMA12G32111	K7LVX0
GLYMA12G32111	K7LVX1
GLYMA12G32111	K7LVX3
GLYMA12G32111	K7LVX0
GLYMA12G32111	K7LVX1
GLYMA12G32111	K7LVX3
GLYMA12G32111	K7LVX0
GLYMA12G32111	K7LVX1
GLYMA12G32111	K7LVX3
GLYMA12G32111	K7LVX0
GLYMA12G32111	K7LVX1
GLYMA12G32111	K7LVX3
GLYMA12G32111	K7LVX0
GLYMA12G32111	K7LVX1
GLYMA12G32340	I1LU92
GLYMA12G32760	I1LUD0
GLYMA12G32760	I1LUD1
GLYMA12G32760	I1LUD0
GLYMA12G32760	I1LUD1
GLYMA12G32780	I1LUD4
GLYMA12G32780	K7LW07
GLYMA12G32780	I1LUD4
GLYMA12G32780	K7LW07
GLYMA12G32780	I1LUD4
GLYMA12G32780	K7LW07
GLYMA12G32795	K7LW08
GLYMA12G32795	K7LW08
GLYMA12G32795	K7LW08
GLYMA12G32795	K7LW08
GLYMA12G33191	K7LW31
GLYMA12G33350	I1LUI1
GLYMA12G33350	I1LUI0
GLYMA12G33350	I1LUI1
GLYMA12G33350	I1LUI0
GLYMA12G33360	I1LUI2
GLYMA12G33530	C6T1A1
GLYMA12G33600	C6TGZ0
GLYMA12G33711	K7LW58
GLYMA12G33711	K7LW58
GLYMA12G33850	I1LUM8
GLYMA12G34061	K7LW77
GLYMA12G34061	K7LW77
GLYMA12G34090	K7LW82
GLYMA12G34090	K7LW80
GLYMA12G34090	I1LUQ2
GLYMA12G34090	K7LW81
GLYMA12G34090	K7LW82
GLYMA12G34090	K7LW80
GLYMA12G34090	I1LUQ2
GLYMA12G34090	K7LW81
GLYMA12G34480	K7LWA1
GLYMA12G34830	I1LUW5
GLYMA12G34840	I1LUW6
GLYMA12G35020	K7LWC8
GLYMA12G35020	K7LWC9
GLYMA12G35020	K7LWC8
GLYMA12G35020	K7LWC9
GLYMA12G35140	K7LWD1
GLYMA12G35500	K7LWE9
GLYMA12G35650	K7LWF5
GLYMA12G35690	K7LWF7
GLYMA12G35690	K7LWF7
GLYMA12G35720	I1LV51
GLYMA12G35850	K7LWG8
GLYMA12G35850	K7LWG8
GLYMA12G36241	K7LWJ5
GLYMA12G36241	K7LWJ4
GLYMA12G36241	K7LWJ5
GLYMA12G36241	K7LWJ4
GLYMA12G36440	I1LVC2
GLYMA12G36510	K7LWL7
GLYMA12G36510	K7LWL6
GLYMA12G36510	K7LWL7
GLYMA12G36510	K7LWL6
GLYMA12G36650	I1LVE2
GLYMA12G36650	K7LWM2
GLYMA12G36675	K7LWM8
GLYMA12G36675	K7LWM8
GLYMA12G36790	K7LWN3
GLYMA12G36851	K7LWN6
GLYMA12G36930	K7LWP0
GLYMA12G36980	K7LWP3
GLYMA13G00211	K7LWR0
GLYMA13G00211	K7LWR0
GLYMA13G00790	I1LVP1
GLYMA13G00790	I1LVP1
GLYMA13G00870	I1LVQ2
GLYMA13G01050	K7LWV7
GLYMA13G01791	K7LWZ2
GLYMA13G01980	I1LW01
GLYMA13G02134	K7LX07
GLYMA13G02146	K7LX08
GLYMA13G02691	K7LX40
GLYMA13G02790	I1LW53
GLYMA13G03340	K7LX57
GLYMA13G03410	K7LX62
GLYMA13G03450	I1LW87
GLYMA13G04100	I1LWC4
GLYMA13G04140	I1LWC6
GLYMA13G04200	K7LXA7
GLYMA13G04561	K7LXC4
GLYMA13G04580	K7LXC6
GLYMA13G05250	K7LXG9
GLYMA13G05250	K7LXH1
GLYMA13G05250	K7LXH0
GLYMA13G05250	K7LXG8
GLYMA13G05250	I1LWJ3
GLYMA13G05250	K7LXG9
GLYMA13G05250	K7LXH1
GLYMA13G05250	K7LXH0
GLYMA13G05250	K7LXG8
GLYMA13G05250	I1LWJ3
GLYMA13G05250	K7LXG9
GLYMA13G05250	K7LXH1
GLYMA13G05250	K7LXH0
GLYMA13G05250	K7LXG8
GLYMA13G05250	I1LWJ3
GLYMA13G05250	K7LXG9
GLYMA13G05250	K7LXH1
GLYMA13G05250	K7LXH0
GLYMA13G05250	K7LXG8
GLYMA13G05250	I1LWJ3
GLYMA13G05250	K7LXG9
GLYMA13G05250	K7LXH1
GLYMA13G05250	K7LXH0
GLYMA13G05250	K7LXG8
GLYMA13G05250	I1LWJ3
GLYMA13G05275	K7LXH2
GLYMA13G05441	K7LXH7
GLYMA13G05441	K7LXH7
GLYMA13G05710	K7LXJ3
GLYMA13G05710	K7LXJ2
GLYMA13G05710	K7LXJ3
GLYMA13G05710	K7LXJ2
GLYMA13G05780	I1LWN8		Fungi - 10	Plants - 47
GLYMA13G05901	K7LXK3
GLYMA13G05901	K7LXK3
GLYMA13G06240	K7LXM4
GLYMA13G06300	K7LXM8
GLYMA13G06541	K7LXN8
GLYMA13G06541	K7LXN8
GLYMA13G06910	I1LWX1
GLYMA13G07070	K7LXQ9
GLYMA13G07540	K7LXT1
GLYMA13G07540	K7LXT1
GLYMA13G07750	I1LX36
GLYMA13G07750	I1LX36
GLYMA13G07760	I1LX37
GLYMA13G08101	K7LXY7
GLYMA13G08101	K7LXY7
GLYMA13G08101	K7LXY7
GLYMA13G08810	K7LXZ9
GLYMA13G08940	I1LX98
GLYMA13G08940	I1LX98
GLYMA13G08940	I1LX98
GLYMA13G09420	K7LY31
GLYMA13G09742	K7LY52
GLYMA13G09755	K7LY53
GLYMA13G09865	K7LY59
GLYMA13G09890	K7LY60
GLYMA13G09890	K7LY60
GLYMA13G10410	K7LY81
GLYMA13G10410	K7LY84
GLYMA13G10410	K7LY81
GLYMA13G10410	K7LY84
GLYMA13G10410	K7LY81
GLYMA13G10410	K7LY84
GLYMA13G10410	K7LY81
GLYMA13G10410	K7LY84
GLYMA13G10640	I1LXK1
GLYMA13G10685	K7LYA0
GLYMA13G10811	K7LYA6
GLYMA13G10811	K7LYA6
GLYMA13G11090	I1LXM2
GLYMA13G11150	K7LYB7
GLYMA13G11243	K7LYC4
GLYMA13G11243	K7LYC4
GLYMA13G12059	K7LYM3
GLYMA13G12059	K7LYM3
GLYMA13G12059	K7LYM3
GLYMA13G12071	K7LYH6
GLYMA13G12077	K7LYN1
GLYMA13G12077	K7LYN1
GLYMA13G12077	K7LYN1
GLYMA13G12077	K7LYN1
GLYMA13G12077	K7LYN1
GLYMA13G12077	K7LYN1
GLYMA13G12102	K7LYM5
GLYMA13G12170	I1LXU3
GLYMA13G12210	I1LXU6
GLYMA13G13911	K7LYS0
GLYMA13G14563	K7LYS7
GLYMA13G16560	K7LYW5
GLYMA13G16560	Q5GKZ7
GLYMA13G16560	K7LYW5
GLYMA13G16560	Q5GKZ7
GLYMA13G16917	K7LYZ9
GLYMA13G16960	K7LZ10
GLYMA13G16960	K7LZ10
GLYMA13G16983	K7LZ11
GLYMA13G16983	K7LZ11
GLYMA13G18240	I1LYI3
GLYMA13G18340	I1LYJ3
GLYMA13G18790	K7LZC5
GLYMA13G18910	K7LZD6
GLYMA13G18950	I1LYP7
GLYMA13G18950	I1LYP8
GLYMA13G19060	I1LYQ8
GLYMA13G19060	I1LYQ8
GLYMA13G19120	K7LZF1
GLYMA13G19120	K7LZF0
GLYMA13G19120	I1LYR5
GLYMA13G19120	K7LZF1
GLYMA13G19120	K7LZF0
GLYMA13G19120	I1LYR5
GLYMA13G19120	K7LZF1
GLYMA13G19120	K7LZF0
GLYMA13G19120	I1LYR5
GLYMA13G19400	K7LZH3
GLYMA13G19400	K7LZH3
GLYMA13G19400	K7LZH3
GLYMA13G19400	K7LZH3
GLYMA13G19550	I1LYW0
GLYMA13G19580	I1LYW3
GLYMA13G19650	K7LZJ0
GLYMA13G19660	I1LYX0
GLYMA13G20180	I1LZ26
GLYMA13G20231	K7LZN2
GLYMA13G20231	K7LZN2
GLYMA13G20382	K7LZP0
GLYMA13G20382	K7LZP0
GLYMA13G20960	C6T4N0
GLYMA13G21030	I1LZB2
GLYMA13G21030	I1LZB2
GLYMA13G21063	K7LZT6
GLYMA13G21211	K7LZU4
GLYMA13G21291	Q39871
GLYMA13G21840	I1LZI0
GLYMA13G21880	K7LZX9
GLYMA13G21960	I1LZI8
GLYMA13G22271	K7M008
GLYMA13G22961	K7M044
GLYMA13G22961	K7M045
GLYMA13G22961	K7M043
GLYMA13G22961	K7M044
GLYMA13G22961	K7M045
GLYMA13G22961	K7M043
GLYMA13G22961	K7M044
GLYMA13G22961	K7M045
GLYMA13G22961	K7M043
GLYMA13G22990	K7M046
GLYMA13G22990	K7M046
GLYMA13G23130	C6T577
GLYMA13G23130	C6T577
GLYMA13G23221	K7M063
GLYMA13G23221	K7M063
GLYMA13G23330	K7M073
GLYMA13G23470	I1LZW9
GLYMA13G23550	I1LZX7
GLYMA13G23600	K7M078
GLYMA13G23600	K7M079
GLYMA13G23600	K7M078
GLYMA13G23600	K7M079
GLYMA13G23720	I1LZZ7
GLYMA13G23780	I1M003
GLYMA13G23790	I1M005
GLYMA13G23790	C6T9Z5
GLYMA13G23810	K7M088
GLYMA13G23910	I1M022
GLYMA13G24000	I1M032
GLYMA13G24150	I1M048
GLYMA13G24380	I1M070
GLYMA13G24611	K7M0C9
GLYMA13G24720	I1M099
GLYMA13G24760	N/A
GLYMA13G24940	I1M0C1
GLYMA13G24955	K7M0E0
GLYMA13G25150	I1M0E2
GLYMA13G25150	I1M0E2
GLYMA13G25350	K7M0F8
GLYMA13G25550	K7M0H3
GLYMA13G25550	K7M0H3
GLYMA13G25620	I1M0I1
GLYMA13G25620	I1M0I1
GLYMA13G25708	K7M0I5
GLYMA13G25900	K7M0K1
GLYMA13G25911	K7M0K2
GLYMA13G25950	K7M0K5
GLYMA13G26470	K7M0P3
GLYMA13G26470	K7M0P1
GLYMA13G26680	I1M0S2
GLYMA13G27300	K7M0U4
GLYMA13G27390	K7M0V1
GLYMA13G27390	I1M0Z0
GLYMA13G27390	K7M0V1
GLYMA13G27390	I1M0Z0
GLYMA13G27470	I1M0Z7
GLYMA13G28660	K7M122
GLYMA13G28800	I1M1D8
GLYMA13G28910	I1M1F2
GLYMA13G28910	I1M1F3
GLYMA13G29160	I1M1H9
GLYMA13G29190	I1M1I1
GLYMA13G29300	I1M1J2
GLYMA13G29450	I1M1L6
GLYMA13G29591	K7M171
GLYMA13G29591	K7M171
GLYMA13G29720	K7M176
GLYMA13G30015	K7M198
GLYMA13G30030	K7M199
GLYMA13G30030	K7M199
GLYMA13G30306	K7M1C5
GLYMA13G30610	K7M1E8
GLYMA13G30710	I1M1X7
GLYMA13G30880	I1M1Z7
GLYMA13G30890	I1M1Z8
GLYMA13G30950	I1M206
GLYMA13G31180	K7M1J4
GLYMA13G31180	I1M227
GLYMA13G31180	K7M1J4
GLYMA13G31180	I1M227
GLYMA13G31980	K7M1Q0
GLYMA13G32010	K7M1Q2
GLYMA13G32010	K7M1Q2
GLYMA13G32331	K7M1S6
GLYMA13G32331	K7M1S4
GLYMA13G32331	K7M1S6
GLYMA13G32331	K7M1S4
GLYMA13G32331	K7M1S6
GLYMA13G32331	K7M1S4
GLYMA13G32331	K7M1S6
GLYMA13G32331	K7M1S4
GLYMA13G32420	K7M1T4
GLYMA13G32770	I1M2K7
GLYMA13G32881	K7M1V6
GLYMA13G33070	K7M1W8
GLYMA13G33090	K7M1W9
GLYMA13G33090	K7M1W9
GLYMA13G33100	C6TGM5
GLYMA13G33172	K7M1X7
GLYMA13G33172	K7M1X7
GLYMA13G33560	I1M2S4
GLYMA13G33660	I1M2T2
GLYMA13G33761	K7M220
GLYMA13G33817	K7M225
GLYMA13G33880	K7M228
GLYMA13G33901	K7M231
GLYMA13G33901	K7M229
GLYMA13G33901	K7M230
GLYMA13G33901	K7M231
GLYMA13G33901	K7M229
GLYMA13G33901	K7M230
GLYMA13G33901	K7M231
GLYMA13G33901	K7M229
GLYMA13G33901	K7M230
GLYMA13G33975	K7M236
GLYMA13G34290	I1M2Y5
GLYMA13G34380	K7M267
GLYMA13G34380	K7M267
GLYMA13G34960	I1M356
GLYMA13G34960	K7M2A1
GLYMA13G34960	I1M356
GLYMA13G34960	K7M2A1
GLYMA13G35033	K7M2A6
GLYMA13G35033	K7M2A6
GLYMA13G35300	I1M392
GLYMA13G35365	K7M2C8
GLYMA13G35410	K7M2D1
GLYMA13G35410	K7M2C9
GLYMA13G35410	K7M2D0
GLYMA13G35451	K7M2D2
GLYMA13G35451	K7M2D2
GLYMA13G35491	K7M2D3
GLYMA13G35750	I1M3D6
GLYMA13G35910	I1M3E9
GLYMA13G35970	I1M3F5
GLYMA13G35970	K7M2F5
GLYMA13G35970	I1M3F5
GLYMA13G35970	K7M2F5
GLYMA13G36360	I1M3J1
GLYMA13G36520	K7M2I1
GLYMA13G36520	K7M2I1
GLYMA13G36701	K7M2J5
GLYMA13G37285	K7M2P1
GLYMA13G37451	K7M2Q0
GLYMA13G37510	I1M3V1
GLYMA13G37510	I1M3V1
GLYMA13G37680	I1M3W6
GLYMA13G37680	I1M3W7
GLYMA13G37680	I1M3W6
GLYMA13G37680	I1M3W7
GLYMA13G38621	K7M2X5
GLYMA13G38621	K7M2X5
GLYMA13G38870	I1M489
GLYMA13G38950	I1M495
GLYMA13G39220	I1M4C0
GLYMA13G39360	K7M310
GLYMA13G39370	I1M4D8
GLYMA13G39620	I1M4G2
GLYMA13G39950	I1M4J1
GLYMA13G40310	I1M4M7
GLYMA13G40310	I1M4M7
GLYMA13G40310	I1M4M7
GLYMA13G40400	I1M4N7
GLYMA13G40950	I1M4U8
GLYMA13G41031	K7M3D9
GLYMA13G41210	K7M3F1
GLYMA13G41210	K7M3F2
GLYMA13G41210	K7M3F3
GLYMA13G41210	K7M3F1
GLYMA13G41210	K7M3F2
GLYMA13G41210	K7M3F3
GLYMA13G41210	K7M3F1
GLYMA13G41210	K7M3F2
GLYMA13G41210	K7M3F3
GLYMA13G41210	K7M3F1
GLYMA13G41210	K7M3F2
GLYMA13G41210	K7M3F3
GLYMA13G41210	K7M3F1
GLYMA13G41210	K7M3F2
GLYMA13G41210	K7M3F3
GLYMA13G41210	K7M3F1
GLYMA13G41210	K7M3F2
GLYMA13G41210	K7M3F3
GLYMA13G41310	I1M4Y4
GLYMA13G41531	K7M3H4
GLYMA13G41550	I1M512
GLYMA13G41610	I1M523
GLYMA13G41610	I1M522
GLYMA13G41610	I1M523
GLYMA13G41610	I1M522
GLYMA13G41941	K7M3J5
GLYMA13G42280	K7M3L3
GLYMA13G42280	K7M3L3
GLYMA13G42320	I1M597
GLYMA13G42340	I1M599
GLYMA13G42490	I1M5B1
GLYMA13G42490	I1M5B1
GLYMA13G42520	K7M3M8
GLYMA13G42670	I1M5C8
GLYMA13G43150	K7M3S1
GLYMA13G43180	I1M5H4
GLYMA13G43180	I1M5H4
GLYMA13G43860	K7M3W8
GLYMA13G44080	I1M5S4
GLYMA13G44100	C6TH86
GLYMA13G44100	C6TH86
GLYMA13G44100	C6TH86
GLYMA13G44270	K7M3Y7
GLYMA13G44270	K7M3Y7
GLYMA13G44560	I1M5X5
GLYMA14G00360	I1M635
GLYMA14G01070	K7M483
GLYMA14G01070	K7M484
GLYMA14G01070	K7M483
GLYMA14G01070	K7M484
GLYMA14G01231	K7M492
GLYMA14G01231	K7M492
GLYMA14G01405	K7M4A3
GLYMA14G01405	K7M4A3
GLYMA14G01405	K7M4A3
GLYMA14G01405	K7M4A3
GLYMA14G01405	K7M4A3
GLYMA14G01405	K7M4A3
GLYMA14G01405	K7M4A3
GLYMA14G01620	I1M6F0
GLYMA14G01720	I1M6F9
GLYMA14G01970	I1M6J2
GLYMA14G02130	I1M6L3
GLYMA14G02191	K7M4F4
GLYMA14G02230	I1M6M6
GLYMA14G02271	K7M4F8
GLYMA14G02320	K7M4G1
GLYMA14G02340	I1M6N2
GLYMA14G02340	I1M6N2
GLYMA14G02450	I1M6P0
GLYMA14G02590	K7M4I4
GLYMA14G02630	B0ZSJ5
GLYMA14G03130	K7M4M1
GLYMA14G03270	I1M6X9
GLYMA14G03270	K7M4M6
GLYMA14G03270	I1M6X9
GLYMA14G03270	K7M4M6
GLYMA14G03350	K7M4N4
GLYMA14G03420	I1M6Z6
GLYMA14G04040	K7M4R7
GLYMA14G04040	I1M760
GLYMA14G04040	K7M4R7
GLYMA14G04040	I1M760
GLYMA14G04433	K7M4U3
GLYMA14G04455	K7M4U7
GLYMA14G04731	K7M4V7
GLYMA14G04860	I1M7C9
GLYMA14G04890	I1M7D1
GLYMA14G04890	K7M4W2
GLYMA14G04890	I1M7D1
GLYMA14G04890	K7M4W2
GLYMA14G04980	K7M4X1
GLYMA14G04980	K7M4X1
GLYMA14G05090	I1M7F0
GLYMA14G05280	K7M4Z4
GLYMA14G05280	K7M4Z2
GLYMA14G05280	I1M7H1
GLYMA14G05280	K7M4Z4
GLYMA14G05280	K7M4Z2
GLYMA14G05280	I1M7H1
GLYMA14G05280	K7M4Z4
GLYMA14G05280	K7M4Z2
GLYMA14G05280	I1M7H1
GLYMA14G05280	K7M4Z4
GLYMA14G05280	K7M4Z2
GLYMA14G05280	I1M7H1
GLYMA14G05280	K7M4Z4
GLYMA14G05280	K7M4Z2
GLYMA14G05280	I1M7H1
GLYMA14G05280	K7M4Z4
GLYMA14G05280	K7M4Z2
GLYMA14G05280	I1M7H1
GLYMA14G05280	K7M4Z4
GLYMA14G05280	K7M4Z2
GLYMA14G05280	I1M7H1
GLYMA14G05280	K7M4Z4
GLYMA14G05280	K7M4Z2
GLYMA14G05280	I1M7H1
GLYMA14G05663	K7M519
GLYMA14G05820	K7M531
GLYMA14G06020	K7M535
GLYMA14G06290	I1M7R9
GLYMA14G06290	I1M7R9
GLYMA14G06430	I1M7T4
GLYMA14G06570	I1M7V3
GLYMA14G06710	I1M7X5
GLYMA14G06970	I1M806
GLYMA14G06970	I1M807
GLYMA14G06970	I1M806
GLYMA14G06970	I1M807
GLYMA14G06970	I1M806
GLYMA14G06970	I1M807
GLYMA14G06970	I1M806
GLYMA14G06970	I1M807
GLYMA14G07221	K7M5B0
GLYMA14G07221	K7M5B0
GLYMA14G07221	K7M5B0
GLYMA14G07540	I1M863
GLYMA14G08190	K7M5G1
GLYMA14G08300	I1M8F2
GLYMA14G08350	I1M8F6
GLYMA14G08430	I1M8G3
GLYMA14G08560	I1M8H3
GLYMA14G08610	I1M8H6
GLYMA14G08610	I1M8H6
GLYMA14G08610	I1M8H6
GLYMA14G08610	I1M8H6
GLYMA14G08610	I1M8H6
GLYMA14G08610	I1M8H6
GLYMA14G08790	K7M5J9
GLYMA14G09231	K7M5M8
GLYMA14G09231	K7M5M7
GLYMA14G09231	K7M5M6
GLYMA14G09231	K7M5M8
GLYMA14G09231	K7M5M7
GLYMA14G09231	K7M5M6
GLYMA14G09231	K7M5M8
GLYMA14G09231	K7M5M7
GLYMA14G09231	K7M5M6
GLYMA14G09300	I1M8P0
GLYMA14G09361	K7M5N2
GLYMA14G09580	I1M8R6
GLYMA14G09580	I1M8R6
GLYMA14G09871	K7M5Q5
GLYMA14G10100	K7M5R8
GLYMA14G10100	K7M5R9
GLYMA14G10100	K7M5R8
GLYMA14G10100	K7M5R9
GLYMA14G10100	K7M5R8
GLYMA14G10100	K7M5R9
GLYMA14G10100	K7M5R8
GLYMA14G10100	K7M5R9
GLYMA14G10370	I1M8Y0
GLYMA14G10760	I1M915
GLYMA14G10790	I1M919
GLYMA14G10790	I1M918
GLYMA14G10790	I1M920
GLYMA14G11400	I1M961
GLYMA14G11400	I1M962
GLYMA14G11400	I1M961
GLYMA14G11400	I1M962
GLYMA14G12300	I1M9B0
GLYMA14G12470	K7M634
GLYMA14G12540	I1M9B9
GLYMA14G12540	I1M9B9
GLYMA14G12540	I1M9B9
GLYMA14G12560	K7M635
GLYMA14G13251	K7M667
GLYMA14G13251	K7M666
GLYMA14G13251	K7M668
GLYMA14G13251	K7M669
GLYMA14G13251	K7M670
GLYMA14G13251	K7M667
GLYMA14G13251	K7M666
GLYMA14G13251	K7M668
GLYMA14G13251	K7M669
GLYMA14G13251	K7M670
GLYMA14G13251	K7M667
GLYMA14G13251	K7M666
GLYMA14G13251	K7M668
GLYMA14G13251	K7M669
GLYMA14G13251	K7M670
GLYMA14G13271	K7M671
GLYMA14G13333	K7M673
GLYMA14G13828	K7M689
GLYMA14G13828	K7M689
GLYMA14G15820	I1M9M1
GLYMA14G15820	K7M6F1
GLYMA14G16040	I1M9M2
GLYMA14G16231	K7M6G1
GLYMA14G16470	K7M6G5
GLYMA14G17334	K7M6K3
GLYMA14G18380	K7M6M7
GLYMA14G20000	I1M9W6
GLYMA14G21901	K7M6S1
GLYMA14G22780	K7M6U0
GLYMA14G22930	K7M6U4
GLYMA14G22930	K7M6U4
GLYMA14G22940	I1MA16
GLYMA14G23840	I1MA44
GLYMA14G23895	K7M6W4
GLYMA14G24388	K7M6Z1
GLYMA14G24491	K7M6Z7
GLYMA14G24650	K7M711
GLYMA14G24710	K7M716
GLYMA14G24730	K7M717
GLYMA14G24730	K7M717
GLYMA14G25430	I1MAA3
GLYMA14G27363	K7M773
GLYMA14G27456	K7M774
GLYMA14G28376	K7M790
GLYMA14G33490	I1MAM5
GLYMA14G33913	K7M7I1
GLYMA14G34035	K7M7I4
GLYMA14G34470	I1MAR8
GLYMA14G34880	I1MAT8
GLYMA14G35310	K7M7P1
GLYMA14G35440	K7M7Q0
GLYMA14G35440	K7M7Q1
GLYMA14G35440	K7M7Q0
GLYMA14G35440	K7M7Q1
GLYMA14G35770	I1MAY5
GLYMA14G36000	K7M7S8
GLYMA14G36020	I1MB02
GLYMA14G36020	K7M7T0
GLYMA14G36020	I1MB02
GLYMA14G36020	K7M7T0
GLYMA14G36210	I1MB18
GLYMA14G36210	I1MB19
GLYMA14G36210	I1MB18
GLYMA14G36210	I1MB19
GLYMA14G36225	K7M7U7
GLYMA14G36345	K7M7V8
GLYMA14G36480	I1MB38
GLYMA14G36553	K7M7X6
GLYMA14G36553	K7M7X6
GLYMA14G36590	I1MB49
GLYMA14G37460	K7M818
GLYMA14G37590	K7M826
GLYMA14G37741	K7M840
GLYMA14G37750	K7M841
GLYMA14G37770	I1MBF9
GLYMA14G38220	I1MBJ2
GLYMA14G38220	C6SWU0
GLYMA14G38240	I1MBJ4
GLYMA14G38468	K7M880
GLYMA14G38550	I1MBL2
GLYMA14G38700	K7M894
GLYMA14G38700	K7M896
GLYMA14G38700	K7M894
GLYMA14G38700	K7M896
GLYMA14G38700	K7M894
GLYMA14G38700	K7M896
GLYMA14G38985	K7M8B4
GLYMA14G39210	I1MBS6
GLYMA14G39260	I1MBT1
GLYMA14G39260	K7M8D2
GLYMA14G39451	K7M8E3
GLYMA14G39451	K7M8E3
GLYMA14G39950	I1MC04
GLYMA14G40080	K7M8I5
GLYMA15G00360	I1MC87
GLYMA15G00570	I1MCA9
GLYMA15G00790	I1MCD1
GLYMA15G00790	I1MCD2
GLYMA15G00790	I1MCD1
GLYMA15G00790	I1MCD2
GLYMA15G00810	I1MCD3
GLYMA15G00880	K7M8S0
GLYMA15G00880	K7M8S0
GLYMA15G00885	K7M8S4
GLYMA15G00885	K7M8S3
GLYMA15G00885	K7M8S2
GLYMA15G00885	K7M8S4
GLYMA15G00885	K7M8S3
GLYMA15G00885	K7M8S2
GLYMA15G00885	K7M8S4
GLYMA15G00885	K7M8S3
GLYMA15G00885	K7M8S2
GLYMA15G00900	C6TIE6
GLYMA15G01260	I1MCH6
GLYMA15G01610	I1MCL9
GLYMA15G01610	I1MCL9
GLYMA15G01610	I1MCL9
GLYMA15G01610	I1MCL9
GLYMA15G01610	I1MCL9
GLYMA15G01740	K7M8Z0
GLYMA15G01790	K7M8Z2
GLYMA15G02220	I1MCU3
GLYMA15G02220	K7M919
GLYMA15G02220	I1MCU3
GLYMA15G02220	K7M919
GLYMA15G02220	I1MCU3
GLYMA15G02220	K7M919
GLYMA15G02325	K7M928
GLYMA15G03080	K7M969
GLYMA15G03350	K7M987
GLYMA15G03350	K7M987
GLYMA15G03360	K7M988
GLYMA15G03380	K7M989
GLYMA15G03380	I1MD56
GLYMA15G03400	C6TER2
GLYMA15G03420	I1MD60
GLYMA15G03453	K7M992
GLYMA15G03610	I1MD79
GLYMA15G03695	K7M9B2
GLYMA15G03695	K7M9B2
GLYMA15G03695	K7M9B2
GLYMA15G03980	K7M9C6
GLYMA15G04050	I1MDC7
GLYMA15G04050	I1MDC7
GLYMA15G04100	I1MDD3
GLYMA15G04160	I1MDD9
GLYMA15G04280	I1MDF1
GLYMA15G04490	K7M9G2
GLYMA15G04550	I1MDH7
GLYMA15G04570	Q4FH86
GLYMA15G04693	K7M9I1
GLYMA15G04805	K7M9J2
GLYMA15G04805	K7M9J2
GLYMA15G04881	K7M9K0
GLYMA15G05065	K7M9L9
GLYMA15G05350	I1MDQ8
GLYMA15G05420	K7M9P0
GLYMA15G05440	I1MDS3
GLYMA15G05440	I1MDS2
GLYMA15G05440	I1MDS3
GLYMA15G05440	I1MDS2
GLYMA15G05470	I1MDS5
GLYMA15G05510	I1MDS8
GLYMA15G05540	I1MDT1
GLYMA15G05551	K7M9P4
GLYMA15G05610	K7M9P5
GLYMA15G05641	K7M9P6
GLYMA15G05641	K7M9P6
GLYMA15G06270	I1ME01
GLYMA15G06270	I1ME01
GLYMA15G06270	I1ME01
GLYMA15G06270	I1ME01
GLYMA15G06360	K7M9V0
GLYMA15G06360	K7M9U9
GLYMA15G06360	K7M9V0
GLYMA15G06360	K7M9U9
GLYMA15G06450	I1ME19
GLYMA15G07290	I1MEA0
GLYMA15G07700	I1MEE5
GLYMA15G07810	I1MEF8
GLYMA15G07841	K7MA44
GLYMA15G08000	K7MA55
GLYMA15G08000	K7MA55
GLYMA15G08281	K7MA70
GLYMA15G08281	K7MA71
GLYMA15G08281	K7MA70
GLYMA15G08281	K7MA71
GLYMA15G08413	K7MA80
GLYMA15G08510	K7MA84
GLYMA15G08941	K7MAB8
GLYMA15G08941	K7MAB8
GLYMA15G09240	N/A
GLYMA15G09270	K7MAD5
GLYMA15G09340	I1MEW5
GLYMA15G10100	K7MAI5
GLYMA15G10140	K7MAI9
GLYMA15G10140	K7MAI8
GLYMA15G10140	I1MF38
GLYMA15G10160	C6TAG6
GLYMA15G10280	I1MF49
GLYMA15G10280	I1MF49
GLYMA15G10500	I1MF75
GLYMA15G10500	K7MAL4
GLYMA15G10860	I1MFB8
GLYMA15G10960	K7MAP4
GLYMA15G11200	K7MAQ4
GLYMA15G11300	I1MFF8
GLYMA15G11300	K7MAR2
GLYMA15G11610	K7MAS4
GLYMA15G12020	K7MAU2
GLYMA15G12130	I1MFN3
GLYMA15G12130	I1MFN3
GLYMA15G12281	K7MAU8
GLYMA15G12620	K7MAX0
GLYMA15G12910	K7MAY5
GLYMA15G13170	K7MB11
GLYMA15G13690	I1MG36
GLYMA15G13760	I1MG43
GLYMA15G13980	K7MB48
GLYMA15G13990	I1MG62
GLYMA15G14040	N/A
GLYMA15G15010	I1MGE6
GLYMA15G15010	I1MGE6
GLYMA15G15010	I1MGE6
GLYMA15G15780	K7MBE0
GLYMA15G15930	I1MGM2
GLYMA15G15930	I1MGM3
GLYMA15G15930	I1MGM2
GLYMA15G15930	I1MGM3
GLYMA15G16000	I1MGM8
GLYMA15G16100	I1MGN4
GLYMA15G16183	K7MBG5
GLYMA15G16360	I1MGQ0
GLYMA15G16670	I1MGT0
GLYMA15G16860	K7MBK3
GLYMA15G16975	K7MBL0
GLYMA15G16975	K7MBL1
GLYMA15G16975	K7MBL0
GLYMA15G16975	K7MBL1
GLYMA15G17430	I1MGY6
GLYMA15G17430	I1MGY6
GLYMA15G17565	K7MBQ5
GLYMA15G17565	K7MBQ6
GLYMA15G17565	K7MBQ5
GLYMA15G17565	K7MBQ6
GLYMA15G17565	K7MBQ5
GLYMA15G17565	K7MBQ6
GLYMA15G17565	K7MBQ5
GLYMA15G17565	K7MBQ6
GLYMA15G17710	K7MBS2
GLYMA15G17710	K7MBS2
GLYMA15G17880	I1MH31
GLYMA15G17880	I1MH29
GLYMA15G17880	C6THW1
GLYMA15G17880	I1MH31
GLYMA15G17880	I1MH29
GLYMA15G17880	C6THW1
GLYMA15G17900	I1MH34
GLYMA15G17900	I1MH33
GLYMA15G17900	I1MH34
GLYMA15G17900	I1MH33
GLYMA15G17968	K7MBU4
GLYMA15G18241	K7MBW3
GLYMA15G18280	I1MH58
GLYMA15G18360	I1MH66
GLYMA15G18871	K7MC02
GLYMA15G18871	K7MC02
GLYMA15G19540	K7MC36
GLYMA15G19540	K7MC35
GLYMA15G19540	K7MC36
GLYMA15G19540	K7MC35
GLYMA15G19660	K7MC44
GLYMA15G19660	K7MC44
GLYMA15G19690	K7MC48
GLYMA15G19731	K7MC50
GLYMA15G19750	K7MC51
GLYMA15G19750	K7MC51
GLYMA15G19980	K7MC63
GLYMA15G19980	K7MC63
GLYMA15G21371	K7MCC1
GLYMA15G21391	K7MCC3
GLYMA15G21400	I1MHP1
GLYMA15G21427	K7MCC5
GLYMA15G21444	K7MCC6
GLYMA15G21951	K7MCE4
GLYMA15G23171	K7MCI0
GLYMA15G23411	K7MCJ4
GLYMA15G23450	K7MCJ7
GLYMA15G23450	K7MCJ8
GLYMA15G23450	K7MCJ7
GLYMA15G23450	K7MCJ8
GLYMA15G23500	K7MCJ9
GLYMA15G24273	K7MCM3
GLYMA15G24273	K7MCM3
GLYMA15G24273	K7MCM3
GLYMA15G24273	K7MCM3
GLYMA15G27610	K7MCR5
GLYMA15G31290	C6TD20
GLYMA15G34636	K7MD27
GLYMA15G35156	K7MD39
GLYMA15G35330	K7MD50
GLYMA15G35330	K7MD50
GLYMA15G35351	K7MD51
GLYMA15G35440	I1MII8
GLYMA15G37170	I1MIN1
GLYMA15G37170	I1MIN1
GLYMA15G37170	I1MIN1
GLYMA15G37170	I1MIN1
GLYMA15G37220	K7MDC5
GLYMA15G37220	K7MDC4
GLYMA15G37220	K7MDC5
GLYMA15G37220	K7MDC4
GLYMA15G37240	I1MIN6
GLYMA15G37410	K7MDE1
GLYMA15G37410	K7MDE0
GLYMA15G37431	K7MDE2
GLYMA15G37451	K7MDE3
GLYMA15G37475	K7MDE4
GLYMA15G37475	K7MDE4
GLYMA15G37631	K7MDF1
GLYMA15G37860	I1MIS4
GLYMA15G37970	I1MIT2
GLYMA15G38125	K7MDI1
GLYMA15G38190	C6T0U5
GLYMA15G38361	K7MDI6
GLYMA15G38501	K7MDJ4
GLYMA15G38501	K7MDJ4
GLYMA15G38510	I1MIW3
GLYMA15G39220	K7MDM9
GLYMA15G39220	K7MDM8
GLYMA15G39220	K7MDM9
GLYMA15G39220	K7MDM8
GLYMA15G39235	K7MDN0
GLYMA15G39235	K7MDN0
GLYMA15G39370	K7MDN4
GLYMA15G39454	K7MDP0
GLYMA15G39472	K7MDP4
GLYMA15G39472	K7MDP3
GLYMA15G39472	K7MDP1
GLYMA15G39472	K7MDP4
GLYMA15G39472	K7MDP3
GLYMA15G39472	K7MDP1
GLYMA15G39472	K7MDP4
GLYMA15G39472	K7MDP3
GLYMA15G39472	K7MDP1
GLYMA15G39472	K7MDP4
GLYMA15G39472	K7MDP3
GLYMA15G39472	K7MDP1
GLYMA15G39472	K7MDP4
GLYMA15G39472	K7MDP3
GLYMA15G39472	K7MDP1
GLYMA15G39472	K7MDP4
GLYMA15G39472	K7MDP3
GLYMA15G39472	K7MDP1
GLYMA15G39642	K7MDR7
GLYMA15G39642	K7MDR5
GLYMA15G39642	K7MDR7
GLYMA15G39642	K7MDR5
GLYMA15G39642	K7MDR7
GLYMA15G39642	K7MDR5
GLYMA15G39721	K7MDS0
GLYMA15G39721	K7MDS0
GLYMA15G39765	K7MDS4
GLYMA15G39924	K7MDU1
GLYMA15G40120	K7MDU6
GLYMA15G40420	K7MDW2
GLYMA15G40450	C6SWI3
GLYMA15G40520	I1MJ53
GLYMA15G40610	I1MJ61
GLYMA15G40635	K7MDX2
GLYMA15G40720	K7MDY1
GLYMA15G40720	I1MJ69
GLYMA15G40720	K7MDY2
GLYMA15G40720	K7MDY0
GLYMA15G40720	K7MDX7
GLYMA15G40720	K7MDY1
GLYMA15G40720	I1MJ69
GLYMA15G40720	K7MDY2
GLYMA15G40720	K7MDY0
GLYMA15G40720	K7MDX7
GLYMA15G40720	K7MDY1
GLYMA15G40720	I1MJ69
GLYMA15G40720	K7MDY2
GLYMA15G40720	K7MDY0
GLYMA15G40720	K7MDX7
GLYMA15G40810	I1MJ79
GLYMA15G40810	I1MJ79
GLYMA15G40840	I1MJ84
GLYMA15G40990	I1MJ93
GLYMA15G41071	K7MDZ6
GLYMA15G41071	K7MDZ6
GLYMA15G41555	K7ME13
GLYMA15G41555	K7ME13
GLYMA15G41590	K7ME15
GLYMA15G41670	I1MJD9
GLYMA15G41860	K7ME22
GLYMA15G41970	I1MJG1
GLYMA15G42380	I1MJJ6
GLYMA15G42860	I1MJM9
GLYMA15G42880	I1MJN1
GLYMA15G43289	K7MEA2
GLYMA15G43289	K7MEA3
GLYMA15G43289	K7MEA2
GLYMA15G43289	K7MEA3
GLYMA16G00270	K7MEB4
GLYMA16G00315	K7MEC1
GLYMA16G00430	I1MJU9
GLYMA16G00541	K7MED3
GLYMA16G00541	K7MED5
GLYMA16G00541	K7MED4
GLYMA16G00541	K7MED3
GLYMA16G00541	K7MED5
GLYMA16G00541	K7MED4
GLYMA16G00541	K7MED3
GLYMA16G00541	K7MED5
GLYMA16G00541	K7MED4
GLYMA16G00580	I1MJW9
GLYMA16G00580	I1MJW9
GLYMA16G00971	K7MEH4
GLYMA16G00971	K7MEH2
GLYMA16G00971	K7MEH3
GLYMA16G00971	K7MEH1
GLYMA16G00971	K7MEH4
GLYMA16G00971	K7MEH2
GLYMA16G00971	K7MEH3
GLYMA16G00971	K7MEH1
GLYMA16G00971	K7MEH4
GLYMA16G00971	K7MEH2
GLYMA16G00971	K7MEH3
GLYMA16G00971	K7MEH1
GLYMA16G00971	K7MEH4
GLYMA16G00971	K7MEH2
GLYMA16G00971	K7MEH3
GLYMA16G00971	K7MEH1
GLYMA16G01410	I1MK50
GLYMA16G01410	K7MEK6
GLYMA16G01410	I1MK51
GLYMA16G01410	I1MK50
GLYMA16G01410	K7MEK6
GLYMA16G01410	I1MK51
GLYMA16G01410	I1MK50
GLYMA16G01410	K7MEK6
GLYMA16G01410	I1MK51
GLYMA16G01530	I1MK61
GLYMA16G01530	I1MK61
GLYMA16G01530	I1MK61
GLYMA16G01630	I1MK75
GLYMA16G01630	I1MK74
GLYMA16G01630	I1MK73
GLYMA16G01630	I1MK72
GLYMA16G01630	I1MK75
GLYMA16G01630	I1MK74
GLYMA16G01630	I1MK73
GLYMA16G01630	I1MK72
GLYMA16G01630	I1MK75
GLYMA16G01630	I1MK74
GLYMA16G01630	I1MK73
GLYMA16G01630	I1MK72
GLYMA16G01660	I1MK77
GLYMA16G02020	K7MEP1
GLYMA16G02100	I1MKC7
GLYMA16G02340	I1MKF0
GLYMA16G02350	I1MKF1
GLYMA16G02620	K7MET2
GLYMA16G02770	K7MEU4
GLYMA16G02770	K7MEU2
GLYMA16G02770	K7MEU4
GLYMA16G02770	K7MEU2
GLYMA16G02780	I1MKJ1
GLYMA16G02880	K7MEV8
GLYMA16G02951	K7MEW2
GLYMA16G03210	I1MKN6
GLYMA16G03286	C6TI27
GLYMA16G03303	K7MEY4
GLYMA16G03375	K7MEY7
GLYMA16G04060	I1MKX0
GLYMA16G04060	K7MF25
GLYMA16G04060	I1MKX1
GLYMA16G04060	I1MKX0
GLYMA16G04060	K7MF25
GLYMA16G04060	I1MKX1
GLYMA16G04656	K7MF58
GLYMA16G04990	K7MF70
GLYMA16G05030	I1ML75
GLYMA16G05050	I1ML78
GLYMA16G05050	I1ML78
GLYMA16G05050	I1ML78
GLYMA16G05070	K7MF75
GLYMA16G05110	I1ML85
GLYMA16G05220	I1ML96
GLYMA16G05390	I1MLA8
GLYMA16G05390	E7CZZ3
GLYMA16G05390	I1MLA8
GLYMA16G05390	E7CZZ3
GLYMA16G06091	K7MFD1
GLYMA16G06621	K7MFG3
GLYMA16G06640	C7S8B8
GLYMA16G06645	K7MFG4
GLYMA16G06665	K7MFG5
GLYMA16G06670	I1MLM3
GLYMA16G06690	I1MLM5
GLYMA16G07071	K7MFI9
GLYMA16G07081	K7MFJ0
GLYMA16G07100	K7MFJ1
GLYMA16G07230	K7MFJ9
GLYMA16G07810	I1MLV4
GLYMA16G07810	K7MFP1
GLYMA16G07810	K7MFP0
GLYMA16G07810	I1MLV4
GLYMA16G07810	K7MFP1
GLYMA16G07810	K7MFP0
GLYMA16G07845	K7MFP2
GLYMA16G07845	K7MFP2
GLYMA16G07920	I1MLW1
GLYMA16G07927	K7MFP6
GLYMA16G07927	K7MFP5
GLYMA16G07927	K7MFP6
GLYMA16G07927	K7MFP5
GLYMA16G08001	K7MFQ0
GLYMA16G08420	I1MM03
GLYMA16G08450	K7MFT2
GLYMA16G08530	K7MFT6
GLYMA16G08975	K7MFV5
GLYMA16G09351	K7MFX4
GLYMA16G09405	K7MFX7
GLYMA16G09405	K7MFX7
GLYMA16G09740	K7MFY3
GLYMA16G09740	I1MM65
GLYMA16G09740	I1MM66
GLYMA16G09740	K7MFY3
GLYMA16G09740	I1MM65
GLYMA16G09740	I1MM66
GLYMA16G09740	K7MFY3
GLYMA16G09740	I1MM65
GLYMA16G09740	I1MM66
GLYMA16G13540	K7MG64
GLYMA16G13540	K7MG56
GLYMA16G13540	K7MG57
GLYMA16G13540	K7MG64
GLYMA16G13540	K7MG56
GLYMA16G13540	K7MG57
GLYMA16G13540	K7MG64
GLYMA16G13540	K7MG56
GLYMA16G13540	K7MG57
GLYMA16G13540	K7MG64
GLYMA16G13540	K7MG56
GLYMA16G13540	K7MG57
GLYMA16G13540	K7MG64
GLYMA16G13540	K7MG56
GLYMA16G13540	K7MG57
GLYMA16G13540	K7MG64
GLYMA16G13540	K7MG56
GLYMA16G13540	K7MG57
GLYMA16G15166	K7MG84
GLYMA16G15166	K7MG85
GLYMA16G17097	K7MGA7
GLYMA16G17104	K7MGA8
GLYMA16G17104	K7MGA9
GLYMA16G17542	K7MGC9
GLYMA16G17600	K7MGD3
GLYMA16G18060	I1MML8
GLYMA16G20795	K7MGK6
GLYMA16G21111	K7MGK9
GLYMA16G21370	I1MMS7
GLYMA16G21580	I1MMT6
GLYMA16G21580	I1MMT6
GLYMA16G21580	I1MMT6
GLYMA16G21904	K7MGQ4
GLYMA16G22213	K7MGR1
GLYMA16G22680	I1MMY2
GLYMA16G23790	K7MH08
GLYMA16G23790	K7MH08
GLYMA16G23930	K7MH15
GLYMA16G23930	K7MH15
GLYMA16G23930	K7MH15
GLYMA16G24200	K7MH22
GLYMA16G24230	I1MN79
GLYMA16G24680	K7MH50
GLYMA16G24680	I1MNA8
GLYMA16G24680	K7MH51
GLYMA16G24680	K7MH50
GLYMA16G24680	I1MNA8
GLYMA16G24680	K7MH51
GLYMA16G24680	K7MH50
GLYMA16G24680	I1MNA8
GLYMA16G24680	K7MH51
GLYMA16G24831	K7MH61
GLYMA16G24831	K7MH61
GLYMA16G24831	K7MH61
GLYMA16G24831	K7MH61
GLYMA16G25010	I1MNC7
GLYMA16G25032	K7MH73
GLYMA16G25032	K7MH73
GLYMA16G25433	K7MHA2
GLYMA16G25450	I1MNG5
GLYMA16G25450	K7MHA4
GLYMA16G25476	K7MHA5
GLYMA16G25500	I1MNH0
GLYMA16G25540	I1MNH3
GLYMA16G25550	I1MNH4
GLYMA16G25680	K7MHB5
GLYMA16G25770	K7MHC0
GLYMA16G25770	K7MHC0
GLYMA16G25880	I1MNK2
GLYMA16G25880	I1MNK2
GLYMA16G26160	I1MNM9
GLYMA16G26160	K7MHE1
GLYMA16G26160	I1MNM8
GLYMA16G26160	K7MHE2
GLYMA16G26160	K7MHE4
GLYMA16G26160	I1MNM9
GLYMA16G26160	K7MHE1
GLYMA16G26160	I1MNM8
GLYMA16G26160	K7MHE2
GLYMA16G26160	K7MHE4
GLYMA16G26260	I1MNN7
GLYMA16G26311	K7MHF0
GLYMA16G26311	K7MHF0
GLYMA16G26311	K7MHF0
GLYMA16G26311	K7MHF0
GLYMA16G26535	K7MHG0
GLYMA16G26810	I1MNT1
GLYMA16G27532	K7MHM4
GLYMA16G27720	K7MHN7
GLYMA16G27950	I1MP48
GLYMA16G28040	I1MP55
GLYMA16G28111	K7MHR1
GLYMA16G28111	K7MHR2
GLYMA16G28120	K7MHR4
GLYMA16G28161	K7MHR6
GLYMA16G28240	I1MP72
GLYMA16G28370	K7MHS5
[truncated: 3,951 more rows]
